# Supplementary material
Source: publisher figshare collection journal article supplement (https://acs.figshare.com/ndownloader/files/6999173)
Supplement: Supplementary file 1 [file 6999173]

data_2016sot0010a_r_100k
_audit_creation_date              2016-08-01
_audit_creation_method
;
Olex2 1.2
(compiled 2016.02.19 svn.r3266 for OlexSys, GUI svn.r5155)
;
_publ_contact_author_address      ?
_publ_contact_author_email        ?
_publ_contact_author_name         ''
_publ_contact_author_phone        ?
_publ_section_references
;
Burla, M.C., Caliandro, R., Camalli, M., Carrozzini, B., Cascarano, G.L.,
 De Caro, L., Giacovazzo, C., Polidori, G., Siliqi, D., Spagna, R.
 (2007). J. Appl. Cryst. 40, 609-613.

Dolomanov, O.V., Bourhis, L.J., Gildea, R.J, Howard, J.A.K. & Puschmann, H.
 (2009), J. Appl. Cryst. 42, 339-341.

Sheldrick, G.M. (2015). Acta Cryst. C71, 3-8.
;
_chemical_name_common             ?
_chemical_name_systematic         ?
_chemical_formula_moiety          '1(Cs), F, C38 H48 N10, 2(C2 H6 O)'
_chemical_formula_sum             'C42 H60 Cs F N10 O2'
_chemical_formula_weight          888.91
_chemical_melting_point           ?
loop_
  _atom_type_symbol
  _atom_type_description
  _atom_type_scat_dispersion_real
  _atom_type_scat_dispersion_imag
  _atom_type_scat_source
 'C' 'C' 0.0033 0.0016 'International Tables Vol C Tables 4.2.6.8 and 6.1.1.4'
 'H' 'H' 0.0000 0.0000 'International Tables Vol C Tables 4.2.6.8 and 6.1.1.4'
 'Cs' 'Cs' -0.3680 2.1192
 'International Tables Vol C Tables 4.2.6.8 and 6.1.1.4'
 'F' 'F' 0.0171 0.0103 'International Tables Vol C Tables 4.2.6.8 and 6.1.1.4'
 'N' 'N' 0.0061 0.0033 'International Tables Vol C Tables 4.2.6.8 and 6.1.1.4'
 'O' 'O' 0.0106 0.0060 'International Tables Vol C Tables 4.2.6.8 and 6.1.1.4'

_shelx_space_group_comment
;
The symmetry employed for this shelxl refinement is uniquely defined
by the following loop, which should always be used as a source of
symmetry information in preference to the above space-group names.
They are only intended as comments.
;
_space_group_crystal_system       'triclinic'
_space_group_IT_number            2
_space_group_name_H-M_alt         'P -1'
_space_group_name_Hall            '-P 1'
loop_
  _space_group_symop_operation_xyz
 'x, y, z'
 '-x, -y, -z'

_cell_length_a                    11.5405(3)
_cell_length_b                    20.3342(4)
_cell_length_c                    20.4173(5)
_cell_angle_alpha                 117.361(2)
_cell_angle_beta                  97.175(2)
_cell_angle_gamma                 90.5504(18)
_cell_volume                      4209.68(19)
_cell_formula_units_Z             4
_cell_measurement_reflns_used     55544
_cell_measurement_temperature     100(2)
_cell_measurement_theta_max       28.699
_cell_measurement_theta_min       2.966
_shelx_estimated_absorpt_T_max    ?
_shelx_estimated_absorpt_T_min    ?
_exptl_absorpt_coefficient_mu     0.932
_exptl_absorpt_correction_T_max   1.00000
_exptl_absorpt_correction_T_min   0.70925
_exptl_absorpt_correction_type    multi-scan
_exptl_absorpt_process_details
;
Jacobson, R. (1998). REQAB. Private communication to the 
CrysAlisPro, Agilent Technologies,
Version 1.171.37.35 (release 13-08-2014 CrysAlis171 .NET)
(compiled Aug 13 2014,18:06:01)
;
_exptl_absorpt_special_details    ?
_exptl_crystal_colour             'clear grayish colourless'
_exptl_crystal_colour_lustre      clear
_exptl_crystal_colour_modifier    grayish
_exptl_crystal_colour_primary     colourless
_exptl_crystal_density_diffrn     1.403
_exptl_crystal_density_meas       ?
_exptl_crystal_density_method     ?
_exptl_crystal_description        plate
_exptl_crystal_F_000              1848
_exptl_crystal_preparation
'slow diffusion of a CsF solution in ethanol into the DCM solution of calix'
_exptl_crystal_recrystallization_method ?
_exptl_crystal_size_max           0.06
_exptl_crystal_size_mid           0.04
_exptl_crystal_size_min           0.01
_exptl_transmission_factor_max    ?
_exptl_transmission_factor_min    ?
_diffrn_reflns_av_R_equivalents   0.0333
_diffrn_reflns_av_unetI/netI      0.0381
_diffrn_reflns_Laue_measured_fraction_full 0.998
_diffrn_reflns_Laue_measured_fraction_max 0.998
_diffrn_reflns_limit_h_max        15
_diffrn_reflns_limit_h_min        -15
_diffrn_reflns_limit_k_max        27
_diffrn_reflns_limit_k_min        -27
_diffrn_reflns_limit_l_max        27
_diffrn_reflns_limit_l_min        -27
_diffrn_reflns_number             55544
_diffrn_reflns_point_group_measured_fraction_full 0.998
_diffrn_reflns_point_group_measured_fraction_max 0.998
_diffrn_reflns_theta_full         25.242
_diffrn_reflns_theta_max          28.699
_diffrn_reflns_theta_min          2.966
_diffrn_ambient_temperature       100(2)
_diffrn_detector                  'CCD area detector'
_diffrn_detector_area_resol_mean  28.5714
_diffrn_detector_type             'Rigaku HG Saturn724+ (2x2 bin mode)'
_diffrn_measured_fraction_theta_full 0.998
_diffrn_measured_fraction_theta_max 0.998
_diffrn_measurement_device        'four-circle \k diffractometer'
_diffrn_measurement_device_type   'Rigaku AFC12 FRE-HF'
_diffrn_measurement_device_type2  'Rigaku AFC12 (Right)'
_diffrn_measurement_method        'profile data from \w-scans'
_diffrn_measurement_specimen_support 'MiTeGen MicroMesh'
_diffrn_radiation_collimation     0.3
_diffrn_radiation_monochromator   'Confocal mirrors, HF Varimax'
_diffrn_radiation_probe           x-ray
_diffrn_radiation_type            MoK\a
_diffrn_radiation_wavelength      0.71073
_diffrn_source                    'Rotating Anode'
_diffrn_source_current            55.0
_diffrn_source_power              2.475
_diffrn_source_target             Mo
_diffrn_source_type               'Rotating Anode'
_diffrn_source_voltage            45.0
_diffrn_special_details           ?
_reflns_Friedel_coverage          0.000
_reflns_Friedel_fraction_full     .
_reflns_Friedel_fraction_max      .
_reflns_number_gt                 17410
_reflns_number_total              21736
_reflns_special_details
;
 Reflections were merged by SHELXL according to the crystal
 class for the calculation of statistics and refinement.
 
 _reflns_Friedel_fraction is defined as the number of unique
 Friedel pairs measured divided by the number that would be
 possible theoretically, ignoring centric projections and
 systematic absences.
;
_reflns_threshold_expression      'I > 2\s(I)'
_computing_cell_refinement
;
CrystalClear-SM Expert 3.1 b27 (Rigaku, 2013)
;
_computing_data_collection
;
CrystalClear-SM Expert 3.1 b27 (Rigaku, 2013)
;
_computing_data_reduction
;
CrystalClear-SM Expert 3.1 b27 (Rigaku, 2013)
;
_computing_molecular_graphics     'Olex2 (Dolomanov et al., 2009)'
_computing_publication_material   'Olex2 (Dolomanov et al., 2009)'
_computing_structure_refinement   'ShelXL (Sheldrick, 2015)'
_computing_structure_solution     'SIR2004 (Burla et al., 2007)'
_refine_diff_density_max          2.354
_refine_diff_density_min          -1.323
_refine_diff_density_rms          0.095
_refine_ls_extinction_coef        .
_refine_ls_extinction_method      none
_refine_ls_goodness_of_fit_ref    1.027
_refine_ls_hydrogen_treatment     mixed
_refine_ls_matrix_type            full
_refine_ls_number_parameters      1068
_refine_ls_number_reflns          21736
_refine_ls_number_restraints      890
_refine_ls_R_factor_all           0.0697
_refine_ls_R_factor_gt            0.0532
_refine_ls_restrained_S_all       1.035
_refine_ls_shift/su_max           0.002
_refine_ls_shift/su_mean          0.000
_refine_ls_structure_factor_coef  Fsqd
_refine_ls_weighting_details
'w=1/[\s^2^(Fo^2^)+(0.0492P)^2^+10.7966P] where P=(Fo^2^+2Fc^2^)/3'
_refine_ls_weighting_scheme       calc
_refine_ls_wR_factor_gt           0.1229
_refine_ls_wR_factor_ref          0.1312
_refine_special_details           
;
In one macrocycles the Cs position appears to oscillate around the 
central position. This has been modelled as 3 extra positons each 
with 5% occupancies. The position of the oxygen of the ethanol 
sitting between the 2 macrocycles is disordered 50/50. Geometric 
restraints were applied to the ethanol and thermal parameter 
constraints were applied in both cases.
;
_olex2_refinement_description
;
1. Fixed Uiso
 At 1.2 times of:
  All C(H) groups, All C(H,H) groups, All C(H,H,H,H) groups, All N(H) groups
 At 1.5 times of:
  All C(H,H,H) groups, All O(H) groups
2. Restrained distances
 C77-C78
 1.54 with sigma of 0.02
 C78-O3A
 1.4 with sigma of 0.02
3. Uiso/Uaniso restraints and constraints
Uanis(Cs2C) = Uanis(Cs2A) = Uanis(Cs2B) = Uanis(Cs2D)
4. Rigid body (RIGU) restrains
 All non-hydrogen atoms
 with sigma for 1-2 distances of 0.001 and sigma for 1-3 distances of 0.001
5. Others
 Fixed Sof: H78C(0.5) H78D(0.5) H78A(0.5) H78B(0.5) O3A(0.5) H3A(0.5)
 Cs2A(0.85) Cs2D(0.05) Cs2B(0.05) Cs2C(0.05) O3B(0.5) H3B(0.5)
6.a Secondary CH2 refined with riding coordinates:
 C38(H38A,H38B), C65(H65A,H65B), C76(H76A,H76B), C27(H27A,H27B), C28(H28A,
 H28B), C37(H37A,H37B), C66(H66A,H66B), C75(H75A,H75B), C72(H72A,H72B),
 C80(H80A,H80B), C31(H31A,H31B), C33(H33A,H33B), C71(H71A,H71B), C70(H70A,H70B),
  C32(H32A,H32B), C69(H69A,H69B), C34(H34A,H34B), C84(H84A,H84B), C78(H78C,
 H78D), C78(H78A,H78B), C82(H82A,H82B)
6.b Aromatic/amide H refined with riding coordinates:
 N11(H11), N1(H1), N3(H3), N4(H4), N2(H2), N14(H14), N13(H13), N12(H12),
 C55(H55), C5(H5), C17(H17), C56(H56), C4(H4A), C42(H42), C43(H43), C25(H25),
 C18(H18), C24(H24), C30(H30), C63(H63), C49(H49), C68(H68), C12(H12A),
 C50(H50), C35(H35), C11(H11A), C73(H73), C62(H62)
6.c Tetrahedral OH refined with riding coordinates:
 O3A(H3A), O3B(H3B)
6.d Idealised Me refined as rotating group:
 C39(H39A,H39B,H39C), C1(H1A,H1B,H1C), C14(H14A,H14B,H14C), C60(H60A,H60B,
 H60C), C9(H9A,H9B,H9C), C20(H20A,H20B,H20C), C47(H47A,H47B,H47C), C58(H58A,
 H58B,H58C), C8(H8A,H8B,H8C), C22(H22A,H22B,H22C), C79(H79A,H79B,H79C),
 C83(H83A,H83B,H83C), C77(H77A,H77B,H77C), C81(H81A,H81B,H81C)
6.e Idealised tetrahedral OH refined as rotating group:
 O2(H2A), O1(H1D), O4(H4B)
;
_atom_sites_solution_hydrogens    mixed
_atom_sites_solution_primary      direct
_atom_sites_solution_secondary    ?
loop_
  _atom_site_label
  _atom_site_type_symbol
  _atom_site_fract_x
  _atom_site_fract_y
  _atom_site_fract_z
  _atom_site_U_iso_or_equiv
  _atom_site_adp_type
  _atom_site_occupancy
  _atom_site_site_symmetry_order
  _atom_site_calc_flag
  _atom_site_refinement_flags_posn
  _atom_site_refinement_flags_adp
  _atom_site_refinement_flags_occupancy
  _atom_site_disorder_assembly
  _atom_site_disorder_group
 Cs1 Cs 1.89336(2) 0.26501(2) -0.27849(2) 0.03001(6) Uani 1 1 d . U . . .
 F1 F 1.57638(15) 0.16811(9) -0.27542(10) 0.0218(4) Uani 1 1 d . U . . .
 N11 N 1.1969(2) 0.39551(13) 0.28584(13) 0.0188(4) Uani 1 1 d . U . . .
 H11 H 1.1214 0.3873 0.2843 0.023 Uiso 1 1 calc R . . . .
 O2 O 1.1165(2) 0.33397(14) -0.15477(14) 0.0349(5) Uani 1 1 d . U . . .
 H2A H 1.1580 0.3086 -0.1396 0.052 Uiso 1 1 calc GR . . . .
 N1 N 1.5889(2) 0.30470(13) -0.27647(14) 0.0196(4) Uani 1 1 d . U . . .
 H1 H 1.5724 0.2612 -0.2790 0.023 Uiso 1 1 calc R . . . .
 N3 N 1.7938(2) 0.10828(14) -0.27480(14) 0.0198(4) Uani 1 1 d . U . . .
 H3 H 1.7191 0.1160 -0.2733 0.024 Uiso 1 1 calc R . . . .
 N4 N 1.7176(2) 0.26600(14) -0.14483(14) 0.0195(5) Uani 1 1 d . U . . .
 H4 H 1.6646 0.2327 -0.1792 0.023 Uiso 1 1 calc R . . . .
 N2 N 1.6605(2) 0.14571(14) -0.40791(14) 0.0210(5) Uani 1 1 d . U . . .
 H2 H 1.6138 0.1444 -0.3775 0.025 Uiso 1 1 calc R . . . .
 O1 O 1.3585(3) 0.11075(17) -0.33863(17) 0.0479(7) Uani 1 1 d . U . . .
 H1D H 1.4272 0.1281 -0.3180 0.072 Uiso 1 1 calc GR . . . .
 N14 N 1.1176(2) 0.35258(14) 0.41625(14) 0.0218(5) Uani 1 1 d . U . . .
 H14 H 1.0570 0.3566 0.3879 0.026 Uiso 1 1 calc R . . . .
 N7 N 1.3275(2) 0.15747(16) -0.09900(15) 0.0265(5) Uani 1 1 d . U . . .
 N13 N 0.9822(2) 0.19541(13) 0.27924(14) 0.0221(5) Uani 1 1 d . U . . .
 H13 H 0.9630 0.2390 0.2838 0.026 Uiso 1 1 calc R . . . .
 N12 N 1.0519(2) 0.24439(13) 0.15132(14) 0.0199(5) Uani 1 1 d . U . . .
 H12 H 1.0131 0.2765 0.1852 0.024 Uiso 1 1 calc R . . . .
 N5 N 1.2837(2) 0.25631(15) -0.10412(15) 0.0245(5) Uani 1 1 d . U . . .
 N18 N 0.6595(2) 0.34875(17) 0.10638(16) 0.0297(5) Uani 1 1 d . U . . .
 N6 N 1.2397(2) 0.19199(16) -0.11455(15) 0.0267(5) Uani 1 1 d . U . . .
 N17 N 0.8519(3) 0.60235(17) 0.34042(17) 0.0363(6) Uani 1 1 d . U . . .
 N8 N 1.3936(3) -0.08233(17) -0.32518(18) 0.0370(6) Uani 1 1 d . U . . .
 C40 C 1.2368(3) 0.46192(17) 0.42545(17) 0.0221(5) Uani 1 1 d . U . . .
 C44 C 1.2528(3) 0.37573(16) 0.22446(17) 0.0199(5) Uani 1 1 d . U . . .
 C41 C 1.2766(3) 0.43007(16) 0.35004(17) 0.0206(5) Uani 1 1 d . U . . .
 C16 C 1.8427(3) 0.07036(16) -0.33888(17) 0.0203(5) Uani 1 1 d . U . . .
 C38 C 1.6526(3) -0.00113(16) -0.41107(17) 0.0220(5) Uani 1 1 d . U . . .
 H38A H 1.6051 0.0381 -0.3793 0.026 Uiso 1 1 calc R . . . .
 H38B H 1.6077 -0.0270 -0.4618 0.026 Uiso 1 1 calc R . . . .
 N20 N 0.5966(3) 0.24583(18) 0.09645(18) 0.0358(6) Uani 1 1 d . U . . .
 C64 C 1.2172(3) 0.39969(17) 0.44455(17) 0.0234(5) Uani 1 1 d . U . . .
 C55 C 1.0164(3) 0.07657(17) 0.22924(18) 0.0252(6) Uani 1 1 d . U . . .
 H55 H 1.0239 0.0265 0.1942 0.030 Uiso 1 1 calc R . . . .
 N19 N 0.5660(3) 0.31248(18) 0.10985(18) 0.0367(6) Uani 1 1 d . U . . .
 C13 C 1.7433(3) 0.09644(17) -0.43644(17) 0.0234(5) Uani 1 1 d . U . . .
 C5 C 1.6237(3) 0.39138(17) -0.30952(18) 0.0255(6) Uani 1 1 d . U . . .
 H5 H 1.6341 0.4161 -0.3384 0.031 Uiso 1 1 calc R . . . .
 C65 C 1.1231(3) 0.50124(16) 0.42380(17) 0.0217(5) Uani 1 1 d . U . . .
 H65A H 1.0591 0.4637 0.3903 0.026 Uiso 1 1 calc R . . . .
 H65B H 1.1007 0.5255 0.4745 0.026 Uiso 1 1 calc R . . . .
 N10 N 1.5626(3) -0.12382(17) -0.3275(2) 0.0407(7) Uani 1 1 d . U . . .
 C19 C 1.8787(2) 0.13241(16) -0.21338(17) 0.0200(5) Uani 1 1 d . U . . .
 C17 C 1.9603(3) 0.07120(17) -0.31792(18) 0.0245(6) Uani 1 1 d . U . . .
 H17 H 2.0164 0.0491 -0.3505 0.029 Uiso 1 1 calc R . . . .
 C56 C 1.0423(3) 0.10753(17) 0.30781(18) 0.0253(6) Uani 1 1 d . U . . .
 H56 H 1.0699 0.0819 0.3349 0.030 Uiso 1 1 calc R . . . .
 C54 C 0.9786(3) 0.13173(16) 0.21277(17) 0.0215(5) Uani 1 1 d . U . . .
 C3 C 1.6106(2) 0.37072(16) -0.21147(17) 0.0196(5) Uani 1 1 d . U . . .
 C4 C 1.6331(3) 0.42508(17) -0.23110(18) 0.0256(6) Uani 1 1 d . U . . .
 H4A H 1.6518 0.4763 -0.1978 0.031 Uiso 1 1 calc R . . . .
 C6 C 1.5970(3) 0.31688(16) -0.33670(17) 0.0203(5) Uani 1 1 d . U . . .
 C42 C 1.3847(3) 0.42993(18) 0.32878(18) 0.0260(6) Uani 1 1 d . U . . .
 H42 H 1.4568 0.4493 0.3612 0.031 Uiso 1 1 calc R . . . .
 C43 C 1.3694(3) 0.39552(18) 0.24953(18) 0.0260(6) Uani 1 1 d . U . . .
 H43 H 1.4296 0.3877 0.2195 0.031 Uiso 1 1 calc R . . . .
 C25 C 1.8103(3) 0.37422(18) -0.06366(18) 0.0259(6) Uani 1 1 d . U . . .
 H25 H 1.8298 0.4260 -0.0340 0.031 Uiso 1 1 calc R . . . .
 C39 C 1.3324(3) 0.51814(19) 0.48448(18) 0.0296(7) Uani 1 1 d . U . . .
 H39A H 1.4028 0.4926 0.4878 0.044 Uiso 1 1 calc GR . . . .
 H39B H 1.3043 0.5412 0.5329 0.044 Uiso 1 1 calc GR . . . .
 H39C H 1.3513 0.5566 0.4704 0.044 Uiso 1 1 calc GR . . . .
 C18 C 1.9839(3) 0.11101(17) -0.23860(18) 0.0240(6) Uani 1 1 d . U . . .
 H18 H 2.0583 0.1209 -0.2088 0.029 Uiso 1 1 calc R . . . .
 C15 C 1.7682(3) 0.03595(17) -0.41453(18) 0.0228(5) Uani 1 1 d . U . . .
 C1 C 1.6064(3) 0.45616(17) -0.07785(18) 0.0264(6) Uani 1 1 d . U . . .
 H1A H 1.6764 0.4839 -0.0777 0.040 Uiso 1 1 calc GR . . . .
 H1B H 1.6068 0.4595 -0.0284 0.040 Uiso 1 1 calc GR . . . .
 H1C H 1.5362 0.4773 -0.0903 0.040 Uiso 1 1 calc GR . . . .
 C24 C 1.8789(3) 0.31639(18) -0.06411(18) 0.0254(6) Uani 1 1 d . U . . .
 H24 H 1.9529 0.3228 -0.0348 0.030 Uiso 1 1 calc R . . . .
 C48 C 1.1415(3) 0.26285(16) 0.12271(16) 0.0199(5) Uani 1 1 d . U . . .
 C26 C 1.7104(3) 0.34153(16) -0.11400(16) 0.0200(5) Uani 1 1 d . U . . .
 C29 C 1.4007(3) 0.26289(17) -0.08127(16) 0.0216(5) Uani 1 1 d . U . . .
 C76 C 0.8249(3) 0.17314(16) 0.14532(16) 0.0219(5) Uani 1 1 d . U . . .
 H76A H 0.7657 0.1500 0.1611 0.026 Uiso 1 1 calc R . . . .
 H76B H 0.8424 0.2253 0.1843 0.026 Uiso 1 1 calc R . . . .
 C23 C 1.8199(2) 0.24989(17) -0.11407(16) 0.0199(5) Uani 1 1 d . U . . .
 C2 C 1.6060(3) 0.37477(16) -0.13576(17) 0.0211(5) Uani 1 1 d . U . . .
 C14 C 1.8349(3) -0.02218(19) -0.47229(19) 0.0297(7) Uani 1 1 d . U . . .
 H14A H 1.9053 0.0020 -0.4766 0.045 Uiso 1 1 calc GR . . . .
 H14B H 1.7846 -0.0462 -0.5207 0.045 Uiso 1 1 calc GR . . . .
 H14C H 1.8576 -0.0596 -0.4565 0.045 Uiso 1 1 calc GR . . . .
 N9 N 1.4586(3) -0.12704(19) -0.3081(2) 0.0465(7) Uani 1 1 d . U . . .
 N15 N 1.0306(3) 0.63462(17) 0.34845(19) 0.0399(6) Uani 1 1 d . U . . .
 C67 C 1.0263(3) 0.58287(17) 0.37294(18) 0.0281(6) Uani 1 1 d . U . . .
 C27 C 1.4919(3) 0.33119(17) -0.13965(16) 0.0207(5) Uani 1 1 d . U . . .
 H27A H 1.4240 0.3541 -0.1532 0.025 Uiso 1 1 calc R . . . .
 H27B H 1.4907 0.2796 -0.1799 0.025 Uiso 1 1 calc R . . . .
 C53 C 0.9380(3) 0.13171(16) 0.13942(16) 0.0209(5) Uani 1 1 d . U . . .
 C10 C 1.6605(3) 0.19743(17) -0.43341(17) 0.0226(5) Uani 1 1 d . U . . .
 C45 C 1.0791(3) 0.38844(18) 0.14712(19) 0.0252(6) Uani 1 1 d . U . . .
 C36 C 1.5640(3) -0.07545(17) -0.35676(18) 0.0271(6) Uani 1 1 d . U . . .
 N16 N 0.9252(3) 0.64593(19) 0.32869(19) 0.0433(7) Uani 1 1 d . U . . .
 C74 C 0.7092(3) 0.23998(19) 0.08484(17) 0.0266(6) Uani 1 1 d . U . . .
 C28 C 1.4777(3) 0.32899(18) -0.06721(17) 0.0239(6) Uani 1 1 d . U . . .
 H28A H 1.5557 0.3275 -0.0417 0.029 Uiso 1 1 calc R . . . .
 H28B H 1.4434 0.3748 -0.0338 0.029 Uiso 1 1 calc R . . . .
 C30 C 1.4292(3) 0.19975(18) -0.07795(19) 0.0268(6) Uani 1 1 d . U . . .
 H30 H 1.5046 0.1879 -0.0638 0.032 Uiso 1 1 calc R . . . .
 C57 C 1.0206(3) 0.18079(16) 0.33764(17) 0.0222(5) Uani 1 1 d . U . . .
 C59 C 1.0270(3) 0.23981(17) 0.41800(17) 0.0248(5) Uani 1 1 d . U . . .
 C46 C 1.1835(3) 0.34207(16) 0.14704(17) 0.0212(5) Uani 1 1 d . U . . .
 C60 C 1.0488(4) 0.2027(2) 0.4684(2) 0.0337(7) Uani 1 1 d . U . . .
 H60A H 0.9859 0.1640 0.4548 0.051 Uiso 1 1 calc GR . . . .
 H60B H 1.0504 0.2400 0.5205 0.051 Uiso 1 1 calc GR . . . .
 H60C H 1.1241 0.1803 0.4621 0.051 Uiso 1 1 calc GR . . . .
 C61 C 1.1256(3) 0.29807(17) 0.43850(17) 0.0241(5) Uani 1 1 d . U . . .
 C63 C 1.2903(3) 0.3750(2) 0.4854(2) 0.0339(7) Uani 1 1 d . U . . .
 H63 H 1.3658 0.3968 0.5117 0.041 Uiso 1 1 calc R . . . .
 C51 C 1.0319(3) 0.16829(16) 0.11926(16) 0.0198(5) Uani 1 1 d . U . . .
 C49 C 1.1796(3) 0.19776(17) 0.07226(18) 0.0256(6) Uani 1 1 d . U . . .
 H49 H 1.2412 0.1932 0.0439 0.031 Uiso 1 1 calc R . . . .
 C37 C 1.6708(3) -0.05695(17) -0.38045(18) 0.0256(6) Uani 1 1 d . U . . .
 H37A H 1.6966 -0.1032 -0.4193 0.031 Uiso 1 1 calc R . . . .
 H37B H 1.7342 -0.0362 -0.3373 0.031 Uiso 1 1 calc R . . . .
 C68 C 0.9123(3) 0.56163(19) 0.3686(2) 0.0316(6) Uani 1 1 d . U . . .
 H68 H 0.8820 0.5266 0.3820 0.038 Uiso 1 1 calc R . . . .
 C66 C 1.1372(3) 0.55932(17) 0.3972(2) 0.0283(6) Uani 1 1 d . U . . .
 H66A H 1.1832 0.6036 0.4381 0.034 Uiso 1 1 calc R . . . .
 H66B H 1.1830 0.5391 0.3551 0.034 Uiso 1 1 calc R . . . .
 C12 C 1.7979(3) 0.1176(2) -0.4801(2) 0.0350(8) Uani 1 1 d . U . . .
 H12A H 1.8598 0.0941 -0.5069 0.042 Uiso 1 1 calc R . . . .
 C9 C 1.5724(3) 0.28863(19) -0.46978(19) 0.0313(7) Uani 1 1 d . U . . .
 H9A H 1.5157 0.3266 -0.4586 0.047 Uiso 1 1 calc GR . . . .
 H9B H 1.5512 0.2495 -0.5213 0.047 Uiso 1 1 calc GR . . . .
 H9C H 1.6509 0.3113 -0.4636 0.047 Uiso 1 1 calc GR . . . .
 C50 C 1.1104(3) 0.13839(17) 0.07005(18) 0.0249(6) Uani 1 1 d . U . . .
 H50 H 1.1173 0.0870 0.0397 0.030 Uiso 1 1 calc R . . . .
 C52 C 0.9121(3) 0.05087(17) 0.07882(19) 0.0266(6) Uani 1 1 d . U . . .
 C75 C 0.7731(3) 0.17212(19) 0.07202(18) 0.0276(6) Uani 1 1 d . U . . .
 H75A H 0.8370 0.1691 0.0428 0.033 Uiso 1 1 calc R . . . .
 H75B H 0.7184 0.1274 0.0425 0.033 Uiso 1 1 calc R . . . .
 C35 C 1.4553(3) -0.04933(19) -0.3559(2) 0.0308(6) Uani 1 1 d . U . . .
 H35 H 1.4286 -0.0152 -0.3732 0.037 Uiso 1 1 calc R . . . .
 C7 C 1.5712(3) 0.25491(17) -0.41642(17) 0.0232(5) Uani 1 1 d . U . . .
 C20 C 1.7433(3) 0.12767(19) -0.12962(19) 0.0262(6) Uani 1 1 d . U . . .
 H20A H 1.6754 0.1262 -0.1644 0.039 Uiso 1 1 calc GR . . . .
 H20B H 1.7246 0.1524 -0.0786 0.039 Uiso 1 1 calc GR . . . .
 H20C H 1.7632 0.0769 -0.1420 0.039 Uiso 1 1 calc GR . . . .
 C47 C 1.2612(3) 0.34344(19) 0.09220(19) 0.0297(7) Uani 1 1 d . U . . .
 H47A H 1.2875 0.3949 0.1069 0.045 Uiso 1 1 calc GR . . . .
 H47B H 1.2165 0.3210 0.0419 0.045 Uiso 1 1 calc GR . . . .
 H47C H 1.3295 0.3152 0.0926 0.045 Uiso 1 1 calc GR . . . .
 C11 C 1.7454(3) 0.1810(2) -0.4783(2) 0.0344(7) Uani 1 1 d . U . . .
 H11A H 1.7657 0.2074 -0.5038 0.041 Uiso 1 1 calc R . . . .
 C58 C 0.9100(3) 0.27561(18) 0.42922(18) 0.0267(6) Uani 1 1 d . U . . .
 H58A H 0.8967 0.3010 0.3984 0.040 Uiso 1 1 calc GR . . . .
 H58B H 0.9120 0.3116 0.4818 0.040 Uiso 1 1 calc GR . . . .
 H58C H 0.8464 0.2371 0.4146 0.040 Uiso 1 1 calc GR . . . .
 C73 C 0.7497(3) 0.3058(2) 0.09065(19) 0.0306(6) Uani 1 1 d . U . . .
 H73 H 0.8258 0.3185 0.0848 0.037 Uiso 1 1 calc R . . . .
 C8 C 1.4492(3) 0.21620(18) -0.42946(19) 0.0280(6) Uani 1 1 d . U . . .
 H8A H 1.4479 0.1937 -0.3962 0.042 Uiso 1 1 calc GR . . . .
 H8B H 1.4316 0.1775 -0.4814 0.042 Uiso 1 1 calc GR . . . .
 H8C H 1.3903 0.2528 -0.4191 0.042 Uiso 1 1 calc GR . . . .
 C21 C 1.8489(3) 0.17115(17) -0.13554(17) 0.0221(5) Uani 1 1 d . U . . .
 C62 C 1.2328(3) 0.3111(2) 0.4811(2) 0.0332(7) Uani 1 1 d . U . . .
 H62 H 1.2634 0.2823 0.5040 0.040 Uiso 1 1 calc R . . . .
 C22 C 1.9545(3) 0.1730(2) -0.08074(19) 0.0285(6) Uani 1 1 d . U . . .
 H22A H 1.9705 0.1222 -0.0912 0.043 Uiso 1 1 calc GR . . . .
 H22B H 1.9371 0.2006 -0.0296 0.043 Uiso 1 1 calc GR . . . .
 H22C H 2.0232 0.1976 -0.0864 0.043 Uiso 1 1 calc GR . . . .
 C72 C 0.6561(4) 0.4270(2) 0.1259(2) 0.0403(8) Uani 1 1 d . U . . .
 H72A H 0.5745 0.4380 0.1153 0.048 Uiso 1 1 calc R . . . .
 H72B H 0.7045 0.4389 0.0954 0.048 Uiso 1 1 calc R . . . .
 C80 C 1.1283(3) 0.4088(2) -0.0992(2) 0.0333(7) Uani 1 1 d . U . . .
 H80A H 1.2101 0.4295 -0.0904 0.040 Uiso 1 1 calc R . . . .
 H80B H 1.1090 0.4122 -0.0519 0.040 Uiso 1 1 calc R . . . .
 C31 C 1.3046(4) 0.0842(2) -0.1038(2) 0.0402(8) Uani 1 1 d . U . . .
 H31A H 1.2202 0.0772 -0.1021 0.048 Uiso 1 1 calc R . . . .
 H31B H 1.3488 0.0836 -0.0593 0.048 Uiso 1 1 calc R . . . .
 C33 C 1.2628(4) 0.0075(2) -0.2426(2) 0.0439(8) Uani 1 1 d . U . . .
 H33A H 1.2872 0.0458 -0.2564 0.053 Uiso 1 1 calc R . . . .
 H33B H 1.1799 0.0132 -0.2346 0.053 Uiso 1 1 calc R . . . .
 C79 C 1.0459(3) 0.4523(2) -0.1251(2) 0.0368(8) Uani 1 1 d . U . . .
 H79A H 1.0611 0.4452 -0.1740 0.055 Uiso 1 1 calc GR . . . .
 H79B H 1.0585 0.5052 -0.0891 0.055 Uiso 1 1 calc GR . . . .
 H79C H 0.9648 0.4348 -0.1288 0.055 Uiso 1 1 calc GR . . . .
 C71 C 0.7031(4) 0.4755(2) 0.2098(2) 0.0439(9) Uani 1 1 d . U . . .
 H71A H 0.6616 0.4581 0.2392 0.053 Uiso 1 1 calc R . . . .
 H71B H 0.7873 0.4683 0.2184 0.053 Uiso 1 1 calc R . . . .
 C70 C 0.6890(4) 0.5567(2) 0.2375(2) 0.0422(8) Uani 1 1 d . U . . .
 H70A H 0.6058 0.5639 0.2255 0.051 Uiso 1 1 calc R . . . .
 H70B H 0.7361 0.5755 0.2114 0.051 Uiso 1 1 calc R . . . .
 C32 C 1.3362(4) 0.0198(2) -0.1719(2) 0.0434(8) Uani 1 1 d . U . . .
 H32A H 1.4193 0.0280 -0.1755 0.052 Uiso 1 1 calc R . . . .
 H32B H 1.3285 -0.0258 -0.1662 0.052 Uiso 1 1 calc R . . . .
 C69 C 0.7267(4) 0.6011(2) 0.3204(2) 0.0443(8) Uani 1 1 d . U . . .
 H69A H 0.7041 0.6526 0.3373 0.053 Uiso 1 1 calc R . . . .
 H69B H 0.6854 0.5792 0.3463 0.053 Uiso 1 1 calc R . . . .
 C34 C 1.2736(4) -0.0707(2) -0.3076(2) 0.0458(8) Uani 1 1 d . U . . .
 H34A H 1.2480 -0.1089 -0.2940 0.055 Uiso 1 1 calc R . . . .
 H34B H 1.2207 -0.0772 -0.3525 0.055 Uiso 1 1 calc R . . . .
 C84 C 1.2826(6) 0.1596(4) -0.3023(4) 0.0843(17) Uani 1 1 d . U . . .
 H84A H 1.2226 0.1315 -0.2924 0.101 Uiso 1 1 calc R . . . .
 H84B H 1.3261 0.1950 -0.2532 0.101 Uiso 1 1 calc R . . . .
 C83 C 1.2249(9) 0.2001(6) -0.3298(5) 0.154(5) Uani 1 1 d . U . . .
 H83A H 1.1710 0.1673 -0.3748 0.231 Uiso 1 1 calc GR . . . .
 H83B H 1.2810 0.2275 -0.3424 0.231 Uiso 1 1 calc GR . . . .
 H83C H 1.1804 0.2353 -0.2925 0.231 Uiso 1 1 calc GR . . . .
 C78 C 1.4525(5) 0.1010(3) 0.1100(3) 0.0684(13) Uani 1 1 d D U . . .
 H78C H 1.4215 0.1472 0.1455 0.082 Uiso 0.5 1 calc R . P A 2
 H78D H 1.5312 0.0991 0.1343 0.082 Uiso 0.5 1 calc R . P A 2
 H78A H 1.5347 0.0919 0.1217 0.082 Uiso 0.5 1 calc R . P B 1
 H78B H 1.4429 0.0940 0.0582 0.082 Uiso 0.5 1 calc R . P B 1
 C77 C 1.3804(5) 0.0406(3) 0.1079(4) 0.0715(14) Uani 1 1 d D U . . .
 H77A H 1.2984 0.0436 0.0906 0.107 Uiso 1 1 calc GR . . . .
 H77B H 1.3871 0.0448 0.1580 0.107 Uiso 1 1 calc GR . . . .
 H77C H 1.4071 -0.0071 0.0738 0.107 Uiso 1 1 calc GR . . . .
 O3A O 1.4720(7) 0.1132(4) 0.0514(4) 0.071(2) Uani 0.5 1 d D U P C 2
 H3A H 1.4753 0.0723 0.0137 0.106 Uiso 0.5 1 calc R . P C 2
 F2 F 0.97591(15) 0.33522(9) 0.28563(9) 0.0209(3) Uani 1 1 d . U . . .
 O4 O 0.7917(2) 0.39880(15) 0.34540(15) 0.0388(6) Uani 1 1 d . U . . .
 H4B H 0.8496 0.3749 0.3291 0.058 Uiso 1 1 calc GR . . . .
 C82 C 0.6911(4) 0.3592(2) 0.3012(2) 0.0450(9) Uani 1 1 d . U . . .
 H82A H 0.7016 0.3403 0.2484 0.054 Uiso 1 1 calc R . . . .
 H82B H 0.6267 0.3928 0.3109 0.054 Uiso 1 1 calc R . . . .
 C81 C 0.6562(4) 0.2951(3) 0.3136(3) 0.0545(11) Uani 1 1 d . U . . .
 H81A H 0.5914 0.2645 0.2751 0.082 Uiso 1 1 calc GR . . . .
 H81B H 0.6314 0.3138 0.3628 0.082 Uiso 1 1 calc GR . . . .
 H81C H 0.7232 0.2651 0.3109 0.082 Uiso 1 1 calc GR . . . .
 Cs2A Cs 1.27797(8) 0.23093(4) 0.28063(5) 0.03827(13) Uani 0.85 1 d . U P D 1
 Cs2D Cs 1.3124(7) 0.2456(5) 0.2970(5) 0.03827(13) Uani 0.05 1 d . U P E 1
 Cs2B Cs 1.2491(10) 0.2283(8) 0.2847(9) 0.03827(13) Uani 0.05 1 d . U P F 1
 Cs2C Cs 1.2782(14) 0.2171(6) 0.2611(6) 0.03827(13) Uani 0.05 1 d . U P G 1
 O3B O 1.4435(5) 0.1670(4) 0.1498(4) 0.0491(13) Uani 0.5 1 d . U P C 1
 H3B H 1.4080 0.1853 0.1243 0.074 Uiso 0.5 1 calc R . P C 1
 H45A H 1.027(3) 0.393(2) 0.180(2) 0.022(9) Uiso 1 1 d . . . . .
 H52A H 0.887(3) 0.049(2) 0.031(2) 0.031(10) Uiso 1 1 d . . . . .
 H52B H 0.979(3) 0.024(2) 0.076(2) 0.027(9) Uiso 1 1 d . . . . .
 H45B H 1.108(3) 0.439(2) 0.164(2) 0.022(9) Uiso 1 1 d . . . . .
 H45C H 1.036(4) 0.366(2) 0.098(3) 0.046(12) Uiso 1 1 d . . . . .
 H52C H 0.845(4) 0.024(2) 0.087(2) 0.040(11) Uiso 1 1 d . . . . .

loop_
  _atom_site_aniso_label
  _atom_site_aniso_U_11
  _atom_site_aniso_U_22
  _atom_site_aniso_U_33
  _atom_site_aniso_U_23
  _atom_site_aniso_U_13
  _atom_site_aniso_U_12
 Cs1 0.02902(11) 0.02901(11) 0.03800(12) 0.02237(9) -0.00164(8) -0.00558(8)
 F1 0.0203(8) 0.0197(8) 0.0254(9) 0.0105(7) 0.0026(7) 0.0011(6)
 N11 0.0187(9) 0.0166(10) 0.0194(9) 0.0064(8) 0.0051(7) 0.0021(8)
 O2 0.0367(14) 0.0313(11) 0.0333(12) 0.0136(10) -0.0011(10) 0.0060(9)
 N1 0.0225(12) 0.0167(9) 0.0208(9) 0.0102(7) 0.0022(8) 0.0009(8)
 N3 0.0178(9) 0.0209(11) 0.0244(9) 0.0135(8) 0.0038(7) 0.0026(8)
 N4 0.0181(10) 0.0206(9) 0.0197(10) 0.0099(8) 0.0005(8) -0.0001(7)
 N2 0.0246(11) 0.0214(10) 0.0209(11) 0.0125(9) 0.0056(9) 0.0031(8)
 O1 0.0363(14) 0.0545(17) 0.0548(17) 0.0322(15) -0.0135(12) -0.0159(12)
 N14 0.0246(10) 0.0228(10) 0.0202(11) 0.0117(9) 0.0030(8) 0.0064(8)
 N7 0.0271(11) 0.0288(10) 0.0254(12) 0.0127(9) 0.0089(9) 0.0028(8)
 N13 0.0342(13) 0.0132(9) 0.0211(9) 0.0088(8) 0.0085(8) 0.0055(8)
 N12 0.0257(11) 0.0145(9) 0.0180(10) 0.0047(8) 0.0095(8) 0.0027(7)
 N5 0.0217(10) 0.0299(11) 0.0236(12) 0.0133(10) 0.0056(8) 0.0022(8)
 N18 0.0275(11) 0.0362(10) 0.0251(13) 0.0143(9) 0.0019(9) 0.0058(8)
 N6 0.0244(10) 0.0306(11) 0.0263(13) 0.0132(10) 0.0079(9) 0.0016(8)
 N17 0.0486(12) 0.0317(13) 0.0305(14) 0.0144(11) 0.0108(9) 0.0193(9)
 N8 0.0446(12) 0.0289(13) 0.0376(15) 0.0149(12) 0.0096(10) -0.0083(9)
 C40 0.0213(11) 0.0222(10) 0.0194(10) 0.0064(8) 0.0043(8) 0.0034(8)
 C44 0.0222(10) 0.0155(11) 0.0213(9) 0.0067(8) 0.0081(7) 0.0027(8)
 C41 0.0196(10) 0.0181(11) 0.0205(9) 0.0058(8) 0.0041(7) 0.0028(8)
 C16 0.0224(10) 0.0165(11) 0.0261(9) 0.0126(8) 0.0067(7) 0.0028(8)
 C38 0.0243(11) 0.0171(11) 0.0247(13) 0.0099(10) 0.0031(9) 0.0024(9)
 N20 0.0264(11) 0.0379(12) 0.0405(16) 0.0162(11) 0.0043(10) 0.0029(9)
 C64 0.0239(11) 0.0248(10) 0.0198(12) 0.0088(9) 0.0037(9) 0.0051(8)
 C55 0.0329(15) 0.0164(10) 0.0285(11) 0.0106(9) 0.0107(10) 0.0053(10)
 N19 0.0287(11) 0.0397(12) 0.0415(17) 0.0185(12) 0.0054(10) 0.0054(9)
 C13 0.0264(12) 0.0224(10) 0.0239(12) 0.0120(10) 0.0066(10) 0.0045(9)
 C5 0.0311(15) 0.0204(11) 0.0277(11) 0.0130(9) 0.0058(10) 0.0006(9)
 C65 0.0237(11) 0.0166(11) 0.0222(13) 0.0059(10) 0.0068(9) 0.0029(9)
 N10 0.0543(14) 0.0290(13) 0.0477(17) 0.0241(14) 0.0128(12) 0.0027(11)
 C19 0.0191(10) 0.0201(11) 0.0255(9) 0.0147(8) 0.0028(7) 0.0014(8)
 C17 0.0226(11) 0.0232(13) 0.0302(12) 0.0137(10) 0.0069(8) 0.0046(9)
 C56 0.0322(15) 0.0197(11) 0.0293(11) 0.0141(9) 0.0109(10) 0.0079(10)
 C54 0.0279(13) 0.0146(10) 0.0221(9) 0.0071(8) 0.0096(8) 0.0035(9)
 C3 0.0184(12) 0.0172(10) 0.0222(9) 0.0083(8) 0.0026(8) 0.0011(8)
 C4 0.0310(15) 0.0187(11) 0.0272(11) 0.0107(9) 0.0049(10) -0.0009(9)
 C6 0.0204(12) 0.0203(10) 0.0227(9) 0.0123(7) 0.0025(8) 0.0020(8)
 C42 0.0205(11) 0.0272(14) 0.0254(11) 0.0075(10) 0.0058(8) 0.0018(9)
 C43 0.0220(11) 0.0267(14) 0.0257(11) 0.0081(10) 0.0080(8) 0.0019(9)
 C25 0.0242(12) 0.0251(11) 0.0243(13) 0.0090(10) -0.0006(10) -0.0024(9)
 C39 0.0266(13) 0.0308(14) 0.0221(13) 0.0047(11) 0.0033(10) -0.0012(11)
 C18 0.0195(11) 0.0248(13) 0.0308(12) 0.0153(10) 0.0042(8) 0.0033(9)
 C15 0.0250(11) 0.0194(10) 0.0259(10) 0.0116(8) 0.0053(8) 0.0038(8)
 C1 0.0307(15) 0.0198(11) 0.0242(13) 0.0062(9) 0.0049(11) 0.0025(10)
 C24 0.0220(11) 0.0291(11) 0.0233(12) 0.0117(10) -0.0003(9) -0.0015(9)
 C48 0.0246(11) 0.0182(9) 0.0157(11) 0.0062(8) 0.0064(9) 0.0014(7)
 C26 0.0206(10) 0.0205(10) 0.0189(11) 0.0090(9) 0.0037(8) 0.0000(7)
 C29 0.0207(10) 0.0266(11) 0.0178(12) 0.0096(9) 0.0067(9) 0.0033(8)
 C76 0.0260(11) 0.0189(12) 0.0179(11) 0.0054(10) 0.0062(9) 0.0011(9)
 C23 0.0161(10) 0.0267(10) 0.0199(11) 0.0135(8) 0.0028(8) 0.0011(7)
 C2 0.0218(10) 0.0186(10) 0.0211(10) 0.0078(8) 0.0029(8) 0.0006(8)
 C14 0.0334(15) 0.0270(13) 0.0286(13) 0.0114(11) 0.0094(11) 0.0091(11)
 N9 0.0575(14) 0.0369(15) 0.0541(19) 0.0265(15) 0.0168(13) -0.0017(11)
 N15 0.0589(14) 0.0284(13) 0.0374(16) 0.0184(13) 0.0112(11) 0.0089(10)
 C67 0.0436(12) 0.0178(12) 0.0221(13) 0.0061(11) 0.0140(10) 0.0117(9)
 C27 0.0207(11) 0.0211(12) 0.0197(11) 0.0085(10) 0.0044(9) 0.0024(9)
 C53 0.0266(11) 0.0143(10) 0.0197(10) 0.0053(8) 0.0072(8) 0.0010(8)
 C10 0.0300(12) 0.0219(10) 0.0196(12) 0.0128(9) 0.0032(9) 0.0022(9)
 C45 0.0301(13) 0.0225(13) 0.0244(14) 0.0120(12) 0.0042(11) 0.0032(10)
 C36 0.0366(12) 0.0152(12) 0.0259(14) 0.0073(11) 0.0019(10) -0.0046(9)
 N16 0.0608(14) 0.0339(14) 0.0389(16) 0.0189(13) 0.0116(11) 0.0123(11)
 C74 0.0267(11) 0.0323(11) 0.0179(13) 0.0098(10) 0.0003(9) 0.0020(9)
 C28 0.0236(13) 0.0263(12) 0.0203(12) 0.0091(10) 0.0056(9) 0.0004(10)
 C30 0.0251(11) 0.0291(11) 0.0289(15) 0.0149(11) 0.0072(10) 0.0047(9)
 C57 0.0293(14) 0.0194(10) 0.0234(9) 0.0132(8) 0.0096(8) 0.0055(9)
 C59 0.0354(12) 0.0218(10) 0.0219(10) 0.0128(9) 0.0085(8) 0.0089(8)
 C46 0.0255(11) 0.0178(10) 0.0202(10) 0.0082(8) 0.0061(8) 0.0004(8)
 C60 0.0509(19) 0.0310(15) 0.0288(14) 0.0207(13) 0.0104(13) 0.0106(14)
 C61 0.0326(11) 0.0236(10) 0.0199(12) 0.0127(9) 0.0061(9) 0.0091(8)
 C63 0.0319(13) 0.0378(14) 0.0345(16) 0.0207(13) -0.0027(11) 0.0046(11)
 C51 0.0251(11) 0.0146(10) 0.0171(11) 0.0046(8) 0.0056(9) 0.0011(8)
 C49 0.0287(13) 0.0188(10) 0.0247(13) 0.0042(9) 0.0121(11) 0.0006(9)
 C37 0.0314(13) 0.0172(12) 0.0274(14) 0.0106(11) 0.0010(10) 0.0000(10)
 C68 0.0414(12) 0.0269(13) 0.0305(16) 0.0147(13) 0.0124(10) 0.0152(10)
 C66 0.0371(13) 0.0177(12) 0.0316(15) 0.0106(12) 0.0139(11) 0.0055(10)
 C12 0.0435(16) 0.0345(15) 0.0407(17) 0.0247(14) 0.0226(14) 0.0143(13)
 C9 0.0437(18) 0.0294(15) 0.0269(14) 0.0189(12) 0.0023(12) 0.0040(13)
 C50 0.0289(13) 0.0171(10) 0.0243(13) 0.0041(9) 0.0107(11) 0.0014(9)
 C52 0.0360(16) 0.0155(11) 0.0238(13) 0.0037(9) 0.0108(11) -0.0009(10)
 C75 0.0297(14) 0.0303(13) 0.0205(12) 0.0097(10) 0.0042(10) 0.0031(10)
 C35 0.0349(12) 0.0239(13) 0.0335(16) 0.0133(13) 0.0049(10) -0.0051(10)
 C7 0.0295(12) 0.0213(10) 0.0207(10) 0.0120(8) 0.0011(8) 0.0023(8)
 C20 0.0238(12) 0.0328(14) 0.0301(15) 0.0215(13) 0.0037(10) 0.0007(10)
 C47 0.0362(15) 0.0285(15) 0.0261(13) 0.0124(12) 0.0119(11) -0.0015(12)
 C11 0.0451(16) 0.0342(14) 0.0375(16) 0.0247(13) 0.0194(14) 0.0119(12)
 C58 0.0360(13) 0.0237(13) 0.0220(14) 0.0107(12) 0.0095(10) 0.0078(10)
 C73 0.0279(12) 0.0347(12) 0.0305(16) 0.0158(11) 0.0057(10) 0.0058(9)
 C8 0.0292(12) 0.0259(14) 0.0295(15) 0.0147(12) -0.0011(10) 0.0018(10)
 C21 0.0193(11) 0.0267(11) 0.0248(10) 0.0160(8) 0.0027(8) 0.0024(8)
 C62 0.0368(13) 0.0354(14) 0.0317(15) 0.0203(13) 0.0001(11) 0.0073(10)
 C22 0.0237(12) 0.0405(17) 0.0279(13) 0.0220(13) 0.0019(10) 0.0055(11)
 C72 0.0382(18) 0.0387(12) 0.0452(16) 0.0207(11) 0.0051(13) 0.0092(11)
 C80 0.0369(17) 0.0306(13) 0.0298(15) 0.0130(12) 0.0002(12) 0.0004(11)
 C31 0.0449(19) 0.0308(12) 0.0486(17) 0.0197(11) 0.0148(14) 0.0037(11)
 C33 0.0417(18) 0.0408(16) 0.0483(15) 0.0179(13) 0.0158(13) -0.0018(13)
 C79 0.0424(18) 0.0316(15) 0.0318(18) 0.0121(14) -0.0002(14) 0.0045(13)
 C71 0.040(2) 0.0410(14) 0.0457(16) 0.0170(12) 0.0006(14) 0.0107(12)
 C70 0.0437(19) 0.0441(15) 0.0420(15) 0.0224(12) 0.0071(13) 0.0141(13)
 C32 0.0457(19) 0.0325(14) 0.0492(15) 0.0146(12) 0.0157(13) 0.0037(13)
 C69 0.0484(15) 0.0444(17) 0.0412(15) 0.0200(13) 0.0094(11) 0.0210(12)
 C34 0.0442(15) 0.0411(16) 0.0477(17) 0.0153(14) 0.0148(12) -0.0107(12)
 C84 0.071(3) 0.114(4) 0.069(3) 0.043(3) 0.011(2) 0.021(3)
 C83 0.181(8) 0.239(9) 0.143(7) 0.148(7) 0.124(6) 0.150(8)
 C78 0.072(3) 0.064(2) 0.072(3) 0.034(2) 0.009(2) -0.002(2)
 C77 0.056(3) 0.065(2) 0.101(4) 0.049(3) -0.002(3) -0.003(2)
 O3A 0.077(5) 0.064(4) 0.067(3) 0.028(3) 0.005(3) -0.015(4)
 F2 0.0232(8) 0.0164(8) 0.0219(8) 0.0073(7) 0.0056(7) 0.0033(6)
 O4 0.0378(12) 0.0418(14) 0.0380(13) 0.0164(11) 0.0178(10) 0.0166(10)
 C82 0.0409(16) 0.0509(19) 0.0451(19) 0.0222(16) 0.0128(14) 0.0108(14)
 C81 0.058(2) 0.053(2) 0.050(3) 0.0233(19) 0.002(2) -0.0011(18)
 Cs2A 0.0404(4) 0.0297(3) 0.0506(4) 0.0241(3) 0.0037(4) 0.0104(3)
 Cs2D 0.0404(4) 0.0297(3) 0.0506(4) 0.0241(3) 0.0037(4) 0.0104(3)
 Cs2B 0.0404(4) 0.0297(3) 0.0506(4) 0.0241(3) 0.0037(4) 0.0104(3)
 Cs2C 0.0404(4) 0.0297(3) 0.0506(4) 0.0241(3) 0.0037(4) 0.0104(3)
 O3B 0.049(3) 0.058(2) 0.055(3) 0.037(2) 0.018(3) -0.002(2)

_geom_special_details
;
 All esds (except the esd in the dihedral angle between two l.s. planes)
 are estimated using the full covariance matrix.  The cell esds are taken
 into account individually in the estimation of esds in distances, angles
 and torsion angles; correlations between esds in cell parameters are only
 used when they are defined by crystal symmetry.  An approximate (isotropic)
 treatment of cell esds is used for estimating esds involving l.s. planes.
;
loop_
  _geom_bond_atom_site_label_1
  _geom_bond_atom_site_label_2
  _geom_bond_distance
  _geom_bond_site_symmetry_2
  _geom_bond_publ_flag
 N11 H11 0.8800 . ?
 N11 C44 1.375(4) . ?
 N11 C41 1.378(4) . ?
 O2 H2A 0.8400 . ?
 O2 C80 1.412(4) . ?
 N1 H1 0.8800 . ?
 N1 C3 1.378(4) . ?
 N1 C6 1.375(4) . ?
 N3 H3 0.8800 . ?
 N3 C16 1.375(4) . ?
 N3 C19 1.375(4) . ?
 N4 H4 0.8800 . ?
 N4 C26 1.374(4) . ?
 N4 C23 1.381(4) . ?
 N2 H2 0.8800 . ?
 N2 C13 1.370(4) . ?
 N2 C10 1.371(4) . ?
 O1 H1D 0.8400 . ?
 O1 C84 1.344(7) . ?
 N14 H14 0.8800 . ?
 N14 C64 1.370(4) . ?
 N14 C61 1.377(4) . ?
 N7 N6 1.326(4) . ?
 N7 C30 1.347(4) . ?
 N7 C31 1.467(5) . ?
 N13 H13 0.8800 . ?
 N13 C54 1.375(4) . ?
 N13 C57 1.379(4) . ?
 N12 H12 0.8800 . ?
 N12 C48 1.376(4) . ?
 N12 C51 1.379(4) . ?
 N5 N6 1.311(4) . ?
 N5 C29 1.357(4) . ?
 N18 N19 1.329(4) . ?
 N18 C73 1.339(4) . ?
 N18 C72 1.455(5) . ?
 N17 N16 1.337(5) . ?
 N17 C68 1.360(4) . ?
 N17 C69 1.449(5) . ?
 N8 N9 1.323(5) . ?
 N8 C35 1.357(4) . ?
 N8 C34 1.468(5) . ?
 C40 C41 1.506(4) . ?
 C40 C64 1.508(5) . ?
 C40 C65 1.548(4) . ?
 C40 C39 1.535(4) . ?
 C44 C43 1.366(4) . ?
 C44 C46 1.512(4) . ?
 C41 C42 1.370(4) . ?
 C16 C17 1.368(4) . ?
 C16 C15 1.510(4) . ?
 C38 H38A 0.9900 . ?
 C38 H38B 0.9900 . ?
 C38 C15 1.551(4) . ?
 C38 C37 1.532(4) . ?
 N20 N19 1.315(4) . ?
 N20 C74 1.347(4) . ?
 C64 C63 1.369(5) . ?
 C55 H55 0.9500 . ?
 C55 C56 1.417(5) . ?
 C55 C54 1.371(4) . ?
 C13 C15 1.508(4) . ?
 C13 C12 1.366(5) . ?
 C5 H5 0.9500 . ?
 C5 C4 1.411(5) . ?
 C5 C6 1.369(4) . ?
 C65 H65A 0.9900 . ?
 C65 H65B 0.9900 . ?
 C65 C66 1.525(4) . ?
 N10 N9 1.320(5) . ?
 N10 C36 1.366(4) . ?
 C19 C18 1.374(4) . ?
 C19 C21 1.502(4) . ?
 C17 H17 0.9500 . ?
 C17 C18 1.426(5) . ?
 C56 H56 0.9500 . ?
 C56 C57 1.365(4) . ?
 C54 C53 1.512(4) . ?
 C3 C4 1.370(4) . ?
 C3 C2 1.517(4) . ?
 C4 H4A 0.9500 . ?
 C6 C7 1.521(4) . ?
 C42 H42 0.9500 . ?
 C42 C43 1.423(5) . ?
 C43 H43 0.9500 . ?
 C25 H25 0.9500 . ?
 C25 C24 1.421(5) . ?
 C25 C26 1.374(4) . ?
 C39 H39A 0.9800 . ?
 C39 H39B 0.9800 . ?
 C39 H39C 0.9800 . ?
 C18 H18 0.9500 . ?
 C15 C14 1.531(4) . ?
 C1 H1A 0.9800 . ?
 C1 H1B 0.9800 . ?
 C1 H1C 0.9800 . ?
 C1 C2 1.529(4) . ?
 C24 H24 0.9500 . ?
 C24 C23 1.369(4) . ?
 C48 C46 1.505(4) . ?
 C48 C49 1.371(4) . ?
 C26 C2 1.505(4) . ?
 C29 C28 1.496(4) . ?
 C29 C30 1.358(4) . ?
 C76 H76A 0.9900 . ?
 C76 H76B 0.9900 . ?
 C76 C53 1.547(4) . ?
 C76 C75 1.531(4) . ?
 C23 C21 1.506(4) . ?
 C2 C27 1.553(4) . ?
 C14 H14A 0.9800 . ?
 C14 H14B 0.9800 . ?
 C14 H14C 0.9800 . ?
 N15 C67 1.360(4) . ?
 N15 N16 1.290(5) . ?
 C67 C68 1.360(5) . ?
 C67 C66 1.478(5) . ?
 C27 H27A 0.9900 . ?
 C27 H27B 0.9900 . ?
 C27 C28 1.529(4) . ?
 C53 C51 1.508(4) . ?
 C53 C52 1.533(4) . ?
 C10 C7 1.513(4) . ?
 C10 C11 1.364(5) . ?
 C45 C46 1.537(4) . ?
 C45 H45A 0.93(4) . ?
 C45 H45B 0.97(4) . ?
 C45 H45C 0.95(5) . ?
 C36 C37 1.484(5) . ?
 C36 C35 1.366(5) . ?
 C74 C75 1.501(5) . ?
 C74 C73 1.360(5) . ?
 C28 H28A 0.9900 . ?
 C28 H28B 0.9900 . ?
 C30 H30 0.9500 . ?
 C57 C59 1.515(4) . ?
 C59 C60 1.531(4) . ?
 C59 C61 1.507(5) . ?
 C59 C58 1.533(4) . ?
 C46 C47 1.529(4) . ?
 C60 H60A 0.9800 . ?
 C60 H60B 0.9800 . ?
 C60 H60C 0.9800 . ?
 C61 C62 1.368(5) . ?
 C63 H63 0.9500 . ?
 C63 C62 1.414(5) . ?
 C51 C50 1.370(4) . ?
 C49 H49 0.9500 . ?
 C49 C50 1.422(4) . ?
 C37 H37A 0.9900 . ?
 C37 H37B 0.9900 . ?
 C68 H68 0.9500 . ?
 C66 H66A 0.9900 . ?
 C66 H66B 0.9900 . ?
 C12 H12A 0.9500 . ?
 C12 C11 1.416(5) . ?
 C9 H9A 0.9800 . ?
 C9 H9B 0.9800 . ?
 C9 H9C 0.9800 . ?
 C9 C7 1.532(4) . ?
 C50 H50 0.9500 . ?
 C52 H52A 0.96(4) . ?
 C52 H52B 0.95(4) . ?
 C52 H52C 1.01(4) . ?
 C75 H75A 0.9900 . ?
 C75 H75B 0.9900 . ?
 C35 H35 0.9500 . ?
 C7 C8 1.538(5) . ?
 C20 H20A 0.9800 . ?
 C20 H20B 0.9800 . ?
 C20 H20C 0.9800 . ?
 C20 C21 1.547(4) . ?
 C47 H47A 0.9800 . ?
 C47 H47B 0.9800 . ?
 C47 H47C 0.9800 . ?
 C11 H11A 0.9500 . ?
 C58 H58A 0.9800 . ?
 C58 H58B 0.9800 . ?
 C58 H58C 0.9800 . ?
 C73 H73 0.9500 . ?
 C8 H8A 0.9800 . ?
 C8 H8B 0.9800 . ?
 C8 H8C 0.9800 . ?
 C21 C22 1.536(4) . ?
 C62 H62 0.9500 . ?
 C22 H22A 0.9800 . ?
 C22 H22B 0.9800 . ?
 C22 H22C 0.9800 . ?
 C72 H72A 0.9900 . ?
 C72 H72B 0.9900 . ?
 C72 C71 1.550(6) . ?
 C80 H80A 0.9900 . ?
 C80 H80B 0.9900 . ?
 C80 C79 1.512(5) . ?
 C31 H31A 0.9900 . ?
 C31 H31B 0.9900 . ?
 C31 C32 1.498(5) . ?
 C33 H33A 0.9900 . ?
 C33 H33B 0.9900 . ?
 C33 C32 1.491(6) . ?
 C33 C34 1.554(6) . ?
 C79 H79A 0.9800 . ?
 C79 H79B 0.9800 . ?
 C79 H79C 0.9800 . ?
 C71 H71A 0.9900 . ?
 C71 H71B 0.9900 . ?
 C71 C70 1.498(6) . ?
 C70 H70A 0.9900 . ?
 C70 H70B 0.9900 . ?
 C70 C69 1.507(6) . ?
 C32 H32A 0.9900 . ?
 C32 H32B 0.9900 . ?
 C69 H69A 0.9900 . ?
 C69 H69B 0.9900 . ?
 C34 H34A 0.9900 . ?
 C34 H34B 0.9900 . ?
 C84 H84A 0.9900 . ?
 C84 H84B 0.9900 . ?
 C84 C83 1.335(10) . ?
 C83 H83A 0.9800 . ?
 C83 H83B 0.9800 . ?
 C83 H83C 0.9800 . ?
 C78 H78C 0.9900 . ?
 C78 H78D 0.9900 . ?
 C78 H78A 0.9900 . ?
 C78 H78B 0.9900 . ?
 C78 C77 1.460(7) . ?
 C78 O3A 1.370(8) . ?
 C78 O3B 1.221(8) . ?
 C77 H77A 0.9800 . ?
 C77 H77B 0.9800 . ?
 C77 H77C 0.9800 . ?
 O3A H3A 0.8400 . ?
 O4 H4B 0.8400 . ?
 O4 C82 1.365(5) . ?
 C82 H82A 0.9900 . ?
 C82 H82B 0.9900 . ?
 C82 C81 1.497(7) . ?
 C81 H81A 0.9800 . ?
 C81 H81B 0.9800 . ?
 C81 H81C 0.9800 . ?
 O3B H3B 0.8400 . ?

loop_
  _geom_angle_atom_site_label_1
  _geom_angle_atom_site_label_2
  _geom_angle_atom_site_label_3
  _geom_angle
  _geom_angle_site_symmetry_1
  _geom_angle_site_symmetry_3
  _geom_angle_publ_flag
 C44 N11 H11 125.0 . . ?
 C44 N11 C41 110.0(2) . . ?
 C41 N11 H11 125.0 . . ?
 C80 O2 H2A 109.5 . . ?
 C3 N1 H1 125.0 . . ?
 C6 N1 H1 125.0 . . ?
 C6 N1 C3 110.0(2) . . ?
 C16 N3 H3 124.9 . . ?
 C16 N3 C19 110.1(2) . . ?
 C19 N3 H3 124.9 . . ?
 C26 N4 H4 124.9 . . ?
 C26 N4 C23 110.3(2) . . ?
 C23 N4 H4 124.9 . . ?
 C13 N2 H2 124.8 . . ?
 C13 N2 C10 110.4(3) . . ?
 C10 N2 H2 124.8 . . ?
 C84 O1 H1D 109.5 . . ?
 C64 N14 H14 124.8 . . ?
 C64 N14 C61 110.5(3) . . ?
 C61 N14 H14 124.8 . . ?
 N6 N7 C30 110.8(3) . . ?
 N6 N7 C31 119.8(3) . . ?
 C30 N7 C31 129.3(3) . . ?
 C54 N13 H13 125.1 . . ?
 C54 N13 C57 109.8(2) . . ?
 C57 N13 H13 125.1 . . ?
 C48 N12 H12 124.9 . . ?
 C48 N12 C51 110.2(2) . . ?
 C51 N12 H12 124.9 . . ?
 N6 N5 C29 109.2(3) . . ?
 N19 N18 C73 110.9(3) . . ?
 N19 N18 C72 119.4(3) . . ?
 C73 N18 C72 129.4(3) . . ?
 N5 N6 N7 107.2(3) . . ?
 N16 N17 C68 110.8(3) . . ?
 N16 N17 C69 120.1(3) . . ?
 C68 N17 C69 129.0(4) . . ?
 N9 N8 C35 110.7(3) . . ?
 N9 N8 C34 121.1(3) . . ?
 C35 N8 C34 128.1(4) . . ?
 C41 C40 C64 108.6(2) . . ?
 C41 C40 C65 109.5(3) . . ?
 C41 C40 C39 109.6(3) . . ?
 C64 C40 C65 111.1(2) . . ?
 C64 C40 C39 108.5(3) . . ?
 C39 C40 C65 109.5(3) . . ?
 N11 C44 C46 120.6(3) . . ?
 C43 C44 N11 107.5(3) . . ?
 C43 C44 C46 131.9(3) . . ?
 N11 C41 C40 120.7(3) . . ?
 C42 C41 N11 107.1(3) . . ?
 C42 C41 C40 132.2(3) . . ?
 N3 C16 C15 121.1(3) . . ?
 C17 C16 N3 107.2(3) . . ?
 C17 C16 C15 131.7(3) . . ?
 H38A C38 H38B 107.7 . . ?
 C15 C38 H38A 108.8 . . ?
 C15 C38 H38B 108.8 . . ?
 C37 C38 H38A 108.8 . . ?
 C37 C38 H38B 108.8 . . ?
 C37 C38 C15 113.9(3) . . ?
 N19 N20 C74 109.6(3) . . ?
 N14 C64 C40 122.4(3) . . ?
 C63 C64 N14 107.2(3) . . ?
 C63 C64 C40 130.3(3) . . ?
 C56 C55 H55 126.1 . . ?
 C54 C55 H55 126.1 . . ?
 C54 C55 C56 107.8(3) . . ?
 N20 N19 N18 106.6(3) . . ?
 N2 C13 C15 122.3(3) . . ?
 C12 C13 N2 107.1(3) . . ?
 C12 C13 C15 130.5(3) . . ?
 C4 C5 H5 126.0 . . ?
 C6 C5 H5 126.0 . . ?
 C6 C5 C4 108.0(3) . . ?
 C40 C65 H65A 109.2 . . ?
 C40 C65 H65B 109.2 . . ?
 H65A C65 H65B 107.9 . . ?
 C66 C65 C40 112.2(3) . . ?
 C66 C65 H65A 109.2 . . ?
 C66 C65 H65B 109.2 . . ?
 N9 N10 C36 109.3(3) . . ?
 N3 C19 C21 121.6(3) . . ?
 C18 C19 N3 107.5(3) . . ?
 C18 C19 C21 130.8(3) . . ?
 C16 C17 H17 126.0 . . ?
 C16 C17 C18 108.1(3) . . ?
 C18 C17 H17 126.0 . . ?
 C55 C56 H56 126.1 . . ?
 C57 C56 C55 107.7(3) . . ?
 C57 C56 H56 126.1 . . ?
 N13 C54 C53 120.9(3) . . ?
 C55 C54 N13 107.2(3) . . ?
 C55 C54 C53 131.8(3) . . ?
 N1 C3 C2 121.9(3) . . ?
 C4 C3 N1 107.0(3) . . ?
 C4 C3 C2 131.0(3) . . ?
 C5 C4 H4A 126.1 . . ?
 C3 C4 C5 107.8(3) . . ?
 C3 C4 H4A 126.1 . . ?
 N1 C6 C7 122.1(3) . . ?
 C5 C6 N1 107.1(3) . . ?
 C5 C6 C7 130.7(3) . . ?
 C41 C42 H42 126.1 . . ?
 C41 C42 C43 107.8(3) . . ?
 C43 C42 H42 126.1 . . ?
 C44 C43 C42 107.7(3) . . ?
 C44 C43 H43 126.2 . . ?
 C42 C43 H43 126.2 . . ?
 C24 C25 H25 126.2 . . ?
 C26 C25 H25 126.2 . . ?
 C26 C25 C24 107.5(3) . . ?
 C40 C39 H39A 109.5 . . ?
 C40 C39 H39B 109.5 . . ?
 C40 C39 H39C 109.5 . . ?
 H39A C39 H39B 109.5 . . ?
 H39A C39 H39C 109.5 . . ?
 H39B C39 H39C 109.5 . . ?
 C19 C18 C17 107.1(3) . . ?
 C19 C18 H18 126.4 . . ?
 C17 C18 H18 126.4 . . ?
 C16 C15 C38 109.7(3) . . ?
 C16 C15 C14 109.8(3) . . ?
 C13 C15 C16 108.2(2) . . ?
 C13 C15 C38 110.8(3) . . ?
 C13 C15 C14 108.6(3) . . ?
 C14 C15 C38 109.7(3) . . ?
 H1A C1 H1B 109.5 . . ?
 H1A C1 H1C 109.5 . . ?
 H1B C1 H1C 109.5 . . ?
 C2 C1 H1A 109.5 . . ?
 C2 C1 H1B 109.5 . . ?
 C2 C1 H1C 109.5 . . ?
 C25 C24 H24 125.9 . . ?
 C23 C24 C25 108.2(3) . . ?
 C23 C24 H24 125.9 . . ?
 N12 C48 C46 122.6(3) . . ?
 C49 C48 N12 107.2(3) . . ?
 C49 C48 C46 130.2(3) . . ?
 N4 C26 C2 121.6(2) . . ?
 C25 C26 N4 107.2(3) . . ?
 C25 C26 C2 131.2(3) . . ?
 N5 C29 C28 122.4(3) . . ?
 N5 C29 C30 107.7(3) . . ?
 C30 C29 C28 129.8(3) . . ?
 H76A C76 H76B 107.8 . . ?
 C53 C76 H76A 108.9 . . ?
 C53 C76 H76B 108.9 . . ?
 C75 C76 H76A 108.9 . . ?
 C75 C76 H76B 108.9 . . ?
 C75 C76 C53 113.2(2) . . ?
 N4 C23 C21 121.8(3) . . ?
 C24 C23 N4 106.8(3) . . ?
 C24 C23 C21 131.3(3) . . ?
 C3 C2 C1 108.9(3) . . ?
 C3 C2 C27 108.8(2) . . ?
 C1 C2 C27 109.9(2) . . ?
 C26 C2 C3 110.5(2) . . ?
 C26 C2 C1 109.2(2) . . ?
 C26 C2 C27 109.5(2) . . ?
 C15 C14 H14A 109.5 . . ?
 C15 C14 H14B 109.5 . . ?
 C15 C14 H14C 109.5 . . ?
 H14A C14 H14B 109.5 . . ?
 H14A C14 H14C 109.5 . . ?
 H14B C14 H14C 109.5 . . ?
 N10 N9 N8 107.3(3) . . ?
 N16 N15 C67 109.0(3) . . ?
 N15 C67 C68 108.9(3) . . ?
 N15 C67 C66 119.0(3) . . ?
 C68 C67 C66 132.1(3) . . ?
 C2 C27 H27A 108.7 . . ?
 C2 C27 H27B 108.7 . . ?
 H27A C27 H27B 107.6 . . ?
 C28 C27 C2 114.4(2) . . ?
 C28 C27 H27A 108.7 . . ?
 C28 C27 H27B 108.7 . . ?
 C54 C53 C76 109.4(2) . . ?
 C54 C53 C52 108.2(3) . . ?
 C51 C53 C54 110.6(2) . . ?
 C51 C53 C76 110.1(2) . . ?
 C51 C53 C52 109.0(2) . . ?
 C52 C53 C76 109.5(3) . . ?
 N2 C10 C7 122.1(3) . . ?
 C11 C10 N2 106.9(3) . . ?
 C11 C10 C7 130.8(3) . . ?
 C46 C45 H45A 117(2) . . ?
 C46 C45 H45B 109(2) . . ?
 C46 C45 H45C 108(3) . . ?
 H45A C45 H45B 103(3) . . ?
 H45A C45 H45C 107(3) . . ?
 H45B C45 H45C 113(3) . . ?
 N10 C36 C37 122.3(3) . . ?
 C35 C36 N10 107.1(3) . . ?
 C35 C36 C37 130.6(3) . . ?
 N15 N16 N17 107.7(3) . . ?
 N20 C74 C75 123.1(3) . . ?
 N20 C74 C73 107.5(3) . . ?
 C73 C74 C75 129.4(3) . . ?
 C29 C28 C27 111.7(2) . . ?
 C29 C28 H28A 109.3 . . ?
 C29 C28 H28B 109.3 . . ?
 C27 C28 H28A 109.3 . . ?
 C27 C28 H28B 109.3 . . ?
 H28A C28 H28B 107.9 . . ?
 N7 C30 C29 105.2(3) . . ?
 N7 C30 H30 127.4 . . ?
 C29 C30 H30 127.4 . . ?
 N13 C57 C59 121.5(3) . . ?
 C56 C57 N13 107.4(3) . . ?
 C56 C57 C59 131.0(3) . . ?
 C57 C59 C60 108.6(3) . . ?
 C57 C59 C58 109.2(3) . . ?
 C60 C59 C58 109.0(3) . . ?
 C61 C59 C57 111.0(3) . . ?
 C61 C59 C60 108.9(3) . . ?
 C61 C59 C58 110.2(3) . . ?
 C44 C46 C45 109.2(2) . . ?
 C44 C46 C47 109.5(3) . . ?
 C48 C46 C44 110.3(2) . . ?
 C48 C46 C45 110.4(3) . . ?
 C48 C46 C47 108.9(2) . . ?
 C47 C46 C45 108.6(3) . . ?
 C59 C60 H60A 109.5 . . ?
 C59 C60 H60B 109.5 . . ?
 C59 C60 H60C 109.5 . . ?
 H60A C60 H60B 109.5 . . ?
 H60A C60 H60C 109.5 . . ?
 H60B C60 H60C 109.5 . . ?
 N14 C61 C59 122.3(3) . . ?
 C62 C61 N14 106.5(3) . . ?
 C62 C61 C59 131.1(3) . . ?
 C64 C63 H63 126.2 . . ?
 C64 C63 C62 107.5(3) . . ?
 C62 C63 H63 126.2 . . ?
 N12 C51 C53 122.2(3) . . ?
 C50 C51 N12 106.9(3) . . ?
 C50 C51 C53 130.9(3) . . ?
 C48 C49 H49 126.2 . . ?
 C48 C49 C50 107.6(3) . . ?
 C50 C49 H49 126.2 . . ?
 C38 C37 H37A 108.9 . . ?
 C38 C37 H37B 108.9 . . ?
 C36 C37 C38 113.4(3) . . ?
 C36 C37 H37A 108.9 . . ?
 C36 C37 H37B 108.9 . . ?
 H37A C37 H37B 107.7 . . ?
 N17 C68 C67 103.6(3) . . ?
 N17 C68 H68 128.2 . . ?
 C67 C68 H68 128.2 . . ?
 C65 C66 H66A 108.5 . . ?
 C65 C66 H66B 108.5 . . ?
 C67 C66 C65 115.0(3) . . ?
 C67 C66 H66A 108.5 . . ?
 C67 C66 H66B 108.5 . . ?
 H66A C66 H66B 107.5 . . ?
 C13 C12 H12A 126.2 . . ?
 C13 C12 C11 107.6(3) . . ?
 C11 C12 H12A 126.2 . . ?
 H9A C9 H9B 109.5 . . ?
 H9A C9 H9C 109.5 . . ?
 H9B C9 H9C 109.5 . . ?
 C7 C9 H9A 109.5 . . ?
 C7 C9 H9B 109.5 . . ?
 C7 C9 H9C 109.5 . . ?
 C51 C50 C49 108.1(3) . . ?
 C51 C50 H50 126.0 . . ?
 C49 C50 H50 126.0 . . ?
 C53 C52 H52A 110(2) . . ?
 C53 C52 H52B 111(2) . . ?
 C53 C52 H52C 113(2) . . ?
 H52A C52 H52B 109(3) . . ?
 H52A C52 H52C 105(3) . . ?
 H52B C52 H52C 109(3) . . ?
 C76 C75 H75A 109.2 . . ?
 C76 C75 H75B 109.2 . . ?
 C74 C75 C76 112.0(3) . . ?
 C74 C75 H75A 109.2 . . ?
 C74 C75 H75B 109.2 . . ?
 H75A C75 H75B 107.9 . . ?
 N8 C35 C36 105.5(3) . . ?
 N8 C35 H35 127.2 . . ?
 C36 C35 H35 127.2 . . ?
 C6 C7 C9 108.8(3) . . ?
 C6 C7 C8 109.6(3) . . ?
 C10 C7 C6 112.0(2) . . ?
 C10 C7 C9 108.9(3) . . ?
 C10 C7 C8 108.6(3) . . ?
 C9 C7 C8 108.8(3) . . ?
 H20A C20 H20B 109.5 . . ?
 H20A C20 H20C 109.5 . . ?
 H20B C20 H20C 109.5 . . ?
 C21 C20 H20A 109.5 . . ?
 C21 C20 H20B 109.5 . . ?
 C21 C20 H20C 109.5 . . ?
 C46 C47 H47A 109.5 . . ?
 C46 C47 H47B 109.5 . . ?
 C46 C47 H47C 109.5 . . ?
 H47A C47 H47B 109.5 . . ?
 H47A C47 H47C 109.5 . . ?
 H47B C47 H47C 109.5 . . ?
 C10 C11 C12 108.1(3) . . ?
 C10 C11 H11A 126.0 . . ?
 C12 C11 H11A 126.0 . . ?
 C59 C58 H58A 109.5 . . ?
 C59 C58 H58B 109.5 . . ?
 C59 C58 H58C 109.5 . . ?
 H58A C58 H58B 109.5 . . ?
 H58A C58 H58C 109.5 . . ?
 H58B C58 H58C 109.5 . . ?
 N18 C73 C74 105.3(3) . . ?
 N18 C73 H73 127.3 . . ?
 C74 C73 H73 127.3 . . ?
 C7 C8 H8A 109.5 . . ?
 C7 C8 H8B 109.5 . . ?
 C7 C8 H8C 109.5 . . ?
 H8A C8 H8B 109.5 . . ?
 H8A C8 H8C 109.5 . . ?
 H8B C8 H8C 109.5 . . ?
 C19 C21 C23 111.7(2) . . ?
 C19 C21 C20 109.4(3) . . ?
 C19 C21 C22 109.0(3) . . ?
 C23 C21 C20 109.5(2) . . ?
 C23 C21 C22 108.3(3) . . ?
 C22 C21 C20 108.9(3) . . ?
 C61 C62 C63 108.3(3) . . ?
 C61 C62 H62 125.8 . . ?
 C63 C62 H62 125.8 . . ?
 C21 C22 H22A 109.5 . . ?
 C21 C22 H22B 109.5 . . ?
 C21 C22 H22C 109.5 . . ?
 H22A C22 H22B 109.5 . . ?
 H22A C22 H22C 109.5 . . ?
 H22B C22 H22C 109.5 . . ?
 N18 C72 H72A 109.7 . . ?
 N18 C72 H72B 109.7 . . ?
 N18 C72 C71 110.0(3) . . ?
 H72A C72 H72B 108.2 . . ?
 C71 C72 H72A 109.7 . . ?
 C71 C72 H72B 109.7 . . ?
 O2 C80 H80A 110.0 . . ?
 O2 C80 H80B 110.0 . . ?
 O2 C80 C79 108.6(3) . . ?
 H80A C80 H80B 108.4 . . ?
 C79 C80 H80A 110.0 . . ?
 C79 C80 H80B 110.0 . . ?
 N7 C31 H31A 108.4 . . ?
 N7 C31 H31B 108.4 . . ?
 N7 C31 C32 115.3(3) . . ?
 H31A C31 H31B 107.5 . . ?
 C32 C31 H31A 108.4 . . ?
 C32 C31 H31B 108.4 . . ?
 H33A C33 H33B 107.9 . . ?
 C32 C33 H33A 109.2 . . ?
 C32 C33 H33B 109.2 . . ?
 C32 C33 C34 112.0(4) . . ?
 C34 C33 H33A 109.2 . . ?
 C34 C33 H33B 109.2 . . ?
 C80 C79 H79A 109.5 . . ?
 C80 C79 H79B 109.5 . . ?
 C80 C79 H79C 109.5 . . ?
 H79A C79 H79B 109.5 . . ?
 H79A C79 H79C 109.5 . . ?
 H79B C79 H79C 109.5 . . ?
 C72 C71 H71A 108.8 . . ?
 C72 C71 H71B 108.8 . . ?
 H71A C71 H71B 107.7 . . ?
 C70 C71 C72 114.0(3) . . ?
 C70 C71 H71A 108.8 . . ?
 C70 C71 H71B 108.8 . . ?
 C71 C70 H70A 109.1 . . ?
 C71 C70 H70B 109.1 . . ?
 C71 C70 C69 112.3(3) . . ?
 H70A C70 H70B 107.9 . . ?
 C69 C70 H70A 109.1 . . ?
 C69 C70 H70B 109.1 . . ?
 C31 C32 H32A 108.8 . . ?
 C31 C32 H32B 108.8 . . ?
 C33 C32 C31 113.9(4) . . ?
 C33 C32 H32A 108.8 . . ?
 C33 C32 H32B 108.8 . . ?
 H32A C32 H32B 107.7 . . ?
 N17 C69 C70 111.9(3) . . ?
 N17 C69 H69A 109.2 . . ?
 N17 C69 H69B 109.2 . . ?
 C70 C69 H69A 109.2 . . ?
 C70 C69 H69B 109.2 . . ?
 H69A C69 H69B 107.9 . . ?
 N8 C34 C33 112.5(3) . . ?
 N8 C34 H34A 109.1 . . ?
 N8 C34 H34B 109.1 . . ?
 C33 C34 H34A 109.1 . . ?
 C33 C34 H34B 109.1 . . ?
 H34A C34 H34B 107.8 . . ?
 O1 C84 H84A 106.6 . . ?
 O1 C84 H84B 106.6 . . ?
 H84A C84 H84B 106.6 . . ?
 C83 C84 O1 122.8(6) . . ?
 C83 C84 H84A 106.6 . . ?
 C83 C84 H84B 106.6 . . ?
 C84 C83 H83A 109.5 . . ?
 C84 C83 H83B 109.5 . . ?
 C84 C83 H83C 109.5 . . ?
 H83A C83 H83B 109.5 . . ?
 H83A C83 H83C 109.5 . . ?
 H83B C83 H83C 109.5 . . ?
 H78C C78 H78D 106.0 . . ?
 H78A C78 H78B 106.3 . . ?
 C77 C78 H78C 105.3 . . ?
 C77 C78 H78D 105.3 . . ?
 C77 C78 H78A 106.1 . . ?
 C77 C78 H78B 106.1 . . ?
 O3A C78 H78C 105.3 . . ?
 O3A C78 H78D 105.3 . . ?
 O3A C78 C77 128.0(6) . . ?
 O3B C78 H78A 106.1 . . ?
 O3B C78 H78B 106.1 . . ?
 O3B C78 C77 124.8(6) . . ?
 C78 C77 H77A 109.5 . . ?
 C78 C77 H77B 109.5 . . ?
 C78 C77 H77C 109.5 . . ?
 H77A C77 H77B 109.5 . . ?
 H77A C77 H77C 109.5 . . ?
 H77B C77 H77C 109.5 . . ?
 C78 O3A H3A 109.5 . . ?
 C82 O4 H4B 109.5 . . ?
 O4 C82 H82A 108.9 . . ?
 O4 C82 H82B 108.9 . . ?
 O4 C82 C81 113.5(4) . . ?
 H82A C82 H82B 107.7 . . ?
 C81 C82 H82A 108.9 . . ?
 C81 C82 H82B 108.9 . . ?
 C82 C81 H81A 109.5 . . ?
 C82 C81 H81B 109.5 . . ?
 C82 C81 H81C 109.5 . . ?
 H81A C81 H81B 109.5 . . ?
 H81A C81 H81C 109.5 . . ?
 H81B C81 H81C 109.5 . . ?
 C78 O3B H3B 109.5 . . ?

loop_
  _geom_torsion_atom_site_label_1
  _geom_torsion_atom_site_label_2
  _geom_torsion_atom_site_label_3
  _geom_torsion_atom_site_label_4
  _geom_torsion
  _geom_torsion_site_symmetry_1
  _geom_torsion_site_symmetry_2
  _geom_torsion_site_symmetry_3
  _geom_torsion_site_symmetry_4
  _geom_torsion_publ_flag
 N11 C44 C43 C42 -1.3(4) . . . . ?
 N11 C44 C46 C48 -74.2(3) . . . . ?
 N11 C44 C46 C45 47.3(4) . . . . ?
 N11 C44 C46 C47 166.0(3) . . . . ?
 N11 C41 C42 C43 1.1(4) . . . . ?
 N1 C3 C4 C5 0.6(4) . . . . ?
 N1 C3 C2 C1 -167.4(3) . . . . ?
 N1 C3 C2 C26 72.7(3) . . . . ?
 N1 C3 C2 C27 -47.6(4) . . . . ?
 N1 C6 C7 C10 -67.0(4) . . . . ?
 N1 C6 C7 C9 172.6(3) . . . . ?
 N1 C6 C7 C8 53.7(4) . . . . ?
 N3 C16 C17 C18 -0.1(3) . . . . ?
 N3 C16 C15 C38 -41.3(4) . . . . ?
 N3 C16 C15 C13 79.7(3) . . . . ?
 N3 C16 C15 C14 -162.0(3) . . . . ?
 N3 C19 C18 C17 -1.3(3) . . . . ?
 N3 C19 C21 C23 -74.8(3) . . . . ?
 N3 C19 C21 C20 46.7(4) . . . . ?
 N3 C19 C21 C22 165.6(3) . . . . ?
 N4 C26 C2 C3 -76.3(3) . . . . ?
 N4 C26 C2 C1 163.9(3) . . . . ?
 N4 C26 C2 C27 43.5(4) . . . . ?
 N4 C23 C21 C19 71.0(3) . . . . ?
 N4 C23 C21 C20 -50.3(4) . . . . ?
 N4 C23 C21 C22 -168.9(3) . . . . ?
 N2 C13 C15 C16 -78.0(4) . . . . ?
 N2 C13 C15 C38 42.2(4) . . . . ?
 N2 C13 C15 C14 162.8(3) . . . . ?
 N2 C13 C12 C11 -0.6(4) . . . . ?
 N2 C10 C7 C6 75.6(4) . . . . ?
 N2 C10 C7 C9 -164.0(3) . . . . ?
 N2 C10 C7 C8 -45.6(4) . . . . ?
 N2 C10 C11 C12 0.1(4) . . . . ?
 N14 C64 C63 C62 0.2(4) . . . . ?
 N14 C61 C62 C63 0.5(4) . . . . ?
 N7 C31 C32 C33 -66.7(5) . . . . ?
 N13 C54 C53 C76 -45.7(4) . . . . ?
 N13 C54 C53 C51 75.7(3) . . . . ?
 N13 C54 C53 C52 -165.0(3) . . . . ?
 N13 C57 C59 C60 168.9(3) . . . . ?
 N13 C57 C59 C61 -71.5(4) . . . . ?
 N13 C57 C59 C58 50.2(4) . . . . ?
 N12 C48 C46 C44 73.3(4) . . . . ?
 N12 C48 C46 C45 -47.4(4) . . . . ?
 N12 C48 C46 C47 -166.5(3) . . . . ?
 N12 C48 C49 C50 0.4(4) . . . . ?
 N12 C51 C50 C49 0.0(4) . . . . ?
 N5 C29 C28 C27 -70.1(4) . . . . ?
 N5 C29 C30 N7 -0.1(3) . . . . ?
 N18 C72 C71 C70 -172.6(3) . . . . ?
 N6 N7 C30 C29 -0.2(4) . . . . ?
 N6 N7 C31 C32 102.8(4) . . . . ?
 N6 N5 C29 C28 177.7(3) . . . . ?
 N6 N5 C29 C30 0.3(3) . . . . ?
 C40 C41 C42 C43 -176.3(3) . . . . ?
 C40 C64 C63 C62 -175.1(3) . . . . ?
 C40 C65 C66 C67 162.7(3) . . . . ?
 C44 N11 C41 C40 175.9(3) . . . . ?
 C44 N11 C41 C42 -1.9(3) . . . . ?
 C41 N11 C44 C43 2.0(3) . . . . ?
 C41 N11 C44 C46 -175.3(3) . . . . ?
 C41 C40 C64 N14 -79.7(3) . . . . ?
 C41 C40 C64 C63 94.9(4) . . . . ?
 C41 C40 C65 C66 -54.4(3) . . . . ?
 C41 C42 C43 C44 0.1(4) . . . . ?
 C16 N3 C19 C18 1.3(3) . . . . ?
 C16 N3 C19 C21 -175.9(3) . . . . ?
 C16 C17 C18 C19 0.9(4) . . . . ?
 N20 C74 C75 C76 -84.9(4) . . . . ?
 N20 C74 C73 N18 0.6(4) . . . . ?
 C64 N14 C61 C59 177.8(3) . . . . ?
 C64 N14 C61 C62 -0.4(4) . . . . ?
 C64 C40 C41 N11 80.4(3) . . . . ?
 C64 C40 C41 C42 -102.5(4) . . . . ?
 C64 C40 C65 C66 -174.4(3) . . . . ?
 C64 C63 C62 C61 -0.4(4) . . . . ?
 C55 C56 C57 N13 -0.1(4) . . . . ?
 C55 C56 C57 C59 176.7(3) . . . . ?
 C55 C54 C53 C76 134.3(3) . . . . ?
 C55 C54 C53 C51 -104.3(4) . . . . ?
 C55 C54 C53 C52 15.1(5) . . . . ?
 N19 N18 C73 C74 -0.5(4) . . . . ?
 N19 N18 C72 C71 92.0(4) . . . . ?
 N19 N20 C74 C75 176.7(3) . . . . ?
 N19 N20 C74 C73 -0.6(4) . . . . ?
 C13 N2 C10 C7 174.7(3) . . . . ?
 C13 N2 C10 C11 -0.5(4) . . . . ?
 C13 C12 C11 C10 0.3(5) . . . . ?
 C5 C6 C7 C10 117.4(4) . . . . ?
 C5 C6 C7 C9 -3.1(5) . . . . ?
 C5 C6 C7 C8 -122.0(4) . . . . ?
 C65 C40 C41 N11 -41.2(4) . . . . ?
 C65 C40 C41 C42 136.0(4) . . . . ?
 C65 C40 C64 N14 40.7(4) . . . . ?
 C65 C40 C64 C63 -144.6(4) . . . . ?
 N10 C36 C37 C38 -179.6(3) . . . . ?
 N10 C36 C35 N8 0.8(4) . . . . ?
 C19 N3 C16 C17 -0.7(3) . . . . ?
 C19 N3 C16 C15 178.3(3) . . . . ?
 C17 C16 C15 C38 137.5(3) . . . . ?
 C17 C16 C15 C13 -101.6(4) . . . . ?
 C17 C16 C15 C14 16.8(5) . . . . ?
 C56 C55 C54 N13 0.7(4) . . . . ?
 C56 C55 C54 C53 -179.3(3) . . . . ?
 C56 C57 C59 C60 -7.5(5) . . . . ?
 C56 C57 C59 C61 112.1(4) . . . . ?
 C56 C57 C59 C58 -126.2(4) . . . . ?
 C54 N13 C57 C56 0.6(4) . . . . ?
 C54 N13 C57 C59 -176.6(3) . . . . ?
 C54 C55 C56 C57 -0.4(4) . . . . ?
 C54 C53 C51 N12 -78.6(3) . . . . ?
 C54 C53 C51 C50 101.5(4) . . . . ?
 C3 N1 C6 C5 -0.2(3) . . . . ?
 C3 N1 C6 C7 -176.7(3) . . . . ?
 C3 C2 C27 C28 178.4(2) . . . . ?
 C4 C5 C6 N1 0.5(4) . . . . ?
 C4 C5 C6 C7 176.7(3) . . . . ?
 C4 C3 C2 C1 11.8(4) . . . . ?
 C4 C3 C2 C26 -108.1(4) . . . . ?
 C4 C3 C2 C27 131.6(3) . . . . ?
 C6 N1 C3 C4 -0.3(3) . . . . ?
 C6 N1 C3 C2 179.1(3) . . . . ?
 C6 C5 C4 C3 -0.7(4) . . . . ?
 C43 C44 C46 C48 109.2(4) . . . . ?
 C43 C44 C46 C45 -129.3(4) . . . . ?
 C43 C44 C46 C47 -10.6(5) . . . . ?
 C25 C24 C23 N4 0.8(4) . . . . ?
 C25 C24 C23 C21 -177.9(3) . . . . ?
 C25 C26 C2 C3 104.8(4) . . . . ?
 C25 C26 C2 C1 -14.9(5) . . . . ?
 C25 C26 C2 C27 -135.3(3) . . . . ?
 C39 C40 C41 N11 -161.3(3) . . . . ?
 C39 C40 C41 C42 15.9(5) . . . . ?
 C39 C40 C64 N14 161.2(3) . . . . ?
 C39 C40 C64 C63 -24.1(5) . . . . ?
 C39 C40 C65 C66 65.8(3) . . . . ?
 C18 C19 C21 C23 108.8(4) . . . . ?
 C18 C19 C21 C20 -129.8(3) . . . . ?
 C18 C19 C21 C22 -10.9(5) . . . . ?
 C15 C16 C17 C18 -179.0(3) . . . . ?
 C15 C38 C37 C36 163.2(3) . . . . ?
 C15 C13 C12 C11 -175.8(3) . . . . ?
 C1 C2 C27 C28 -62.4(3) . . . . ?
 C24 C25 C26 N4 -0.3(4) . . . . ?
 C24 C25 C26 C2 178.6(3) . . . . ?
 C24 C23 C21 C19 -110.4(4) . . . . ?
 C24 C23 C21 C20 128.2(3) . . . . ?
 C24 C23 C21 C22 9.7(5) . . . . ?
 C48 N12 C51 C53 -179.6(3) . . . . ?
 C48 N12 C51 C50 0.3(4) . . . . ?
 C48 C49 C50 C51 -0.3(4) . . . . ?
 C26 N4 C23 C24 -1.1(3) . . . . ?
 C26 N4 C23 C21 177.8(3) . . . . ?
 C26 C25 C24 C23 -0.3(4) . . . . ?
 C26 C2 C27 C28 57.6(3) . . . . ?
 C29 N5 N6 N7 -0.3(3) . . . . ?
 C76 C53 C51 N12 42.4(4) . . . . ?
 C76 C53 C51 C50 -137.5(3) . . . . ?
 C23 N4 C26 C25 0.9(3) . . . . ?
 C23 N4 C26 C2 -178.2(3) . . . . ?
 C2 C3 C4 C5 -178.7(3) . . . . ?
 C2 C27 C28 C29 -155.1(3) . . . . ?
 N9 N8 C35 C36 -0.5(4) . . . . ?
 N9 N8 C34 C33 108.0(4) . . . . ?
 N9 N10 C36 C37 176.9(3) . . . . ?
 N9 N10 C36 C35 -1.0(4) . . . . ?
 N15 C67 C68 N17 0.4(4) . . . . ?
 N15 C67 C66 C65 179.9(3) . . . . ?
 C67 N15 N16 N17 0.3(4) . . . . ?
 C53 C76 C75 C74 -150.0(3) . . . . ?
 C53 C51 C50 C49 179.8(3) . . . . ?
 C10 N2 C13 C15 176.3(3) . . . . ?
 C10 N2 C13 C12 0.7(4) . . . . ?
 C36 N10 N9 N8 0.7(4) . . . . ?
 N16 N17 C68 C67 -0.2(4) . . . . ?
 N16 N17 C69 C70 76.3(5) . . . . ?
 N16 N15 C67 C68 -0.5(4) . . . . ?
 N16 N15 C67 C66 178.6(3) . . . . ?
 C74 N20 N19 N18 0.3(4) . . . . ?
 C28 C29 C30 N7 -177.2(3) . . . . ?
 C30 N7 N6 N5 0.3(3) . . . . ?
 C30 N7 C31 C32 -79.6(5) . . . . ?
 C30 C29 C28 C27 106.7(4) . . . . ?
 C57 N13 C54 C55 -0.8(4) . . . . ?
 C57 N13 C54 C53 179.2(3) . . . . ?
 C57 C59 C61 N14 76.5(4) . . . . ?
 C57 C59 C61 C62 -105.7(4) . . . . ?
 C59 C61 C62 C63 -177.5(3) . . . . ?
 C46 C44 C43 C42 175.6(3) . . . . ?
 C46 C48 C49 C50 179.9(3) . . . . ?
 C60 C59 C61 N14 -164.0(3) . . . . ?
 C60 C59 C61 C62 13.8(5) . . . . ?
 C61 N14 C64 C40 175.9(3) . . . . ?
 C61 N14 C64 C63 0.2(4) . . . . ?
 C51 N12 C48 C46 -180.0(3) . . . . ?
 C51 N12 C48 C49 -0.5(4) . . . . ?
 C49 C48 C46 C44 -106.0(4) . . . . ?
 C49 C48 C46 C45 133.2(4) . . . . ?
 C49 C48 C46 C47 14.1(5) . . . . ?
 C37 C38 C15 C16 -53.9(3) . . . . ?
 C37 C38 C15 C13 -173.3(3) . . . . ?
 C37 C38 C15 C14 66.9(3) . . . . ?
 C37 C36 C35 N8 -176.8(3) . . . . ?
 C68 N17 N16 N15 -0.1(4) . . . . ?
 C68 N17 C69 C70 -100.7(5) . . . . ?
 C68 C67 C66 C65 -1.3(5) . . . . ?
 C66 C67 C68 N17 -178.5(3) . . . . ?
 C12 C13 C15 C16 96.5(4) . . . . ?
 C12 C13 C15 C38 -143.2(4) . . . . ?
 C12 C13 C15 C14 -22.7(5) . . . . ?
 C52 C53 C51 N12 162.5(3) . . . . ?
 C52 C53 C51 C50 -17.4(5) . . . . ?
 C75 C76 C53 C54 -176.7(2) . . . . ?
 C75 C76 C53 C51 61.6(3) . . . . ?
 C75 C76 C53 C52 -58.2(3) . . . . ?
 C75 C74 C73 N18 -176.4(3) . . . . ?
 C35 N8 N9 N10 -0.1(4) . . . . ?
 C35 N8 C34 C33 -68.7(5) . . . . ?
 C35 C36 C37 C38 -2.2(5) . . . . ?
 C7 C10 C11 C12 -174.5(3) . . . . ?
 C11 C10 C7 C6 -110.5(4) . . . . ?
 C11 C10 C7 C9 9.9(5) . . . . ?
 C11 C10 C7 C8 128.3(4) . . . . ?
 C58 C59 C61 N14 -44.6(4) . . . . ?
 C58 C59 C61 C62 133.2(4) . . . . ?
 C73 N18 N19 N20 0.2(4) . . . . ?
 C73 N18 C72 C71 -81.2(5) . . . . ?
 C73 C74 C75 C76 91.7(4) . . . . ?
 C21 C19 C18 C17 175.5(3) . . . . ?
 C72 N18 N19 N20 -174.2(3) . . . . ?
 C72 N18 C73 C74 173.1(3) . . . . ?
 C72 C71 C70 C69 175.3(4) . . . . ?
 C31 N7 N6 N5 178.4(3) . . . . ?
 C31 N7 C30 C29 -178.0(3) . . . . ?
 C71 C70 C69 N17 67.9(5) . . . . ?
 C32 C33 C34 N8 -61.5(5) . . . . ?
 C69 N17 N16 N15 -177.6(3) . . . . ?
 C69 N17 C68 C67 177.0(3) . . . . ?
 C34 N8 N9 N10 -177.4(3) . . . . ?
 C34 N8 C35 C36 176.5(3) . . . . ?
 C34 C33 C32 C31 -163.9(3) . . . . ?

_shelx_res_file
;
    2016sot0010a_r_100k.res created by SHELXL-2014/7

TITL 2016sot0010a_r_100k_a.res in P-1
REM Old TITL 2016sot0010a_R_100K in P-1 #2
REM SHELXT solution in P-1
REM R1 0.149, Rweak 0.012, Alpha 0.070, Orientation as input
REM Formula found by SHELXT: C95 N12 O5 I2
CELL 0.71073 11.540503 20.334161 20.417272 117.3612 97.1753 90.5504
ZERR 4 0.000258 0.000436 0.000506 0.0023 0.002 0.0018
LATT 1
SFAC C H Cs F N O
UNIT 168 240 4 4 40 8
DFIX 1.54 C77 C78
DFIX 1.4 C78 O3A
RIGU 0.001 0.001
EADP Cs2C Cs2A Cs2B Cs2D

L.S. 4 0 0
PLAN  20
TEMP -173.15
CONN 0 Cs1
CONN 0 Cs2A
CONN 0 Cs2D
CONN 0 Cs2B
CONN 0 Cs2C
BOND $H
CONF
MORE -1
fmap 2
acta
SHEL 7 0.74
OMIT -1 -1 8
OMIT -1 -2 5
OMIT 2 11 0
OMIT -1 -3 10
OMIT 0 -16 2
OMIT 0 16 3
OMIT 0 8 11
OMIT -1 -3 3
REM <olex2.extras>
REM <HklSrc "%.\\2016sot0010a_R_100K.hkl">
REM </olex2.extras>

WGHT    0.049200   10.796599
FVAR       0.21101
CS1   3    1.893363    0.265011   -0.278487    11.00000    0.02902    0.02901 =
         0.03800    0.02237   -0.00164   -0.00558
F1    4    1.576376    0.168106   -0.275416    11.00000    0.02030    0.01968 =
         0.02538    0.01052    0.00259    0.00112
N11   5    1.196908    0.395507    0.285840    11.00000    0.01869    0.01662 =
         0.01940    0.00642    0.00514    0.00208
AFIX  43
H11   2    1.121376    0.387297    0.284331    11.00000   -1.20000
AFIX   0

O2    6    1.116461    0.333970   -0.154768    11.00000    0.03669    0.03128 =
         0.03326    0.01362   -0.00115    0.00600
AFIX 147
H2A   2    1.157968    0.308600   -0.139621    11.00000   -1.50000
AFIX   0

N1    5    1.588916    0.304701   -0.276465    11.00000    0.02254    0.01669 =
         0.02083    0.01016    0.00215    0.00094
AFIX  43
H1    2    1.572355    0.261164   -0.279046    11.00000   -1.20000
AFIX   0
N3    5    1.793830    0.108275   -0.274805    11.00000    0.01779    0.02092 =
         0.02440    0.01349    0.00378    0.00257
AFIX  43
H3    2    1.719083    0.115986   -0.273308    11.00000   -1.20000
AFIX   0
N4    5    1.717620    0.266002   -0.144832    11.00000    0.01808    0.02064 =
         0.01966    0.00985    0.00045   -0.00007
AFIX  43
H4    2    1.664598    0.232671   -0.179250    11.00000   -1.20000
AFIX   0
N2    5    1.660478    0.145711   -0.407906    11.00000    0.02464    0.02139 =
         0.02089    0.01246    0.00557    0.00314
AFIX  43
H2    2    1.613840    0.144352   -0.377514    11.00000   -1.20000
AFIX   0

O1    6    1.358506    0.110747   -0.338635    11.00000    0.03628    0.05454 =
         0.05483    0.03223   -0.01354   -0.01594
AFIX 147
H1D   2    1.427223    0.128103   -0.317975    11.00000   -1.50000
AFIX   0

N14   5    1.117581    0.352575    0.416251    11.00000    0.02462    0.02275 =
         0.02018    0.01171    0.00302    0.00644
AFIX  43
H14   2    1.057017    0.356565    0.387852    11.00000   -1.20000
AFIX   0

N7    5    1.327531    0.157470   -0.098997    11.00000    0.02710    0.02881 =
         0.02536    0.01272    0.00891    0.00280
N13   5    0.982246    0.195410    0.279240    11.00000    0.03416    0.01319 =
         0.02113    0.00877    0.00849    0.00550
AFIX  43
H13   2    0.963033    0.238952    0.283841    11.00000   -1.20000
AFIX   0
N12   5    1.051910    0.244391    0.151316    11.00000    0.02575    0.01445 =
         0.01800    0.00468    0.00948    0.00266
AFIX  43
H12   2    1.013053    0.276542    0.185194    11.00000   -1.20000
AFIX   0

N5    5    1.283735    0.256311   -0.104116    11.00000    0.02173    0.02988 =
         0.02364    0.01326    0.00563    0.00224
N18   5    0.659516    0.348746    0.106378    11.00000    0.02749    0.03621 =
         0.02506    0.01435    0.00185    0.00575
N6    5    1.239702    0.191988   -0.114553    11.00000    0.02445    0.03056 =
         0.02630    0.01318    0.00786    0.00162
N17   5    0.851948    0.602352    0.340419    11.00000    0.04856    0.03170 =
         0.03045    0.01435    0.01080    0.01932
N8    5    1.393599   -0.082332   -0.325178    11.00000    0.04462    0.02892 =
         0.03758    0.01494    0.00956   -0.00833
C40   1    1.236777    0.461922    0.425447    11.00000    0.02127    0.02217 =
         0.01942    0.00635    0.00430    0.00337
C44   1    1.252772    0.375732    0.224460    11.00000    0.02218    0.01550 =
         0.02127    0.00670    0.00812    0.00271
C41   1    1.276641    0.430067    0.350044    11.00000    0.01960    0.01813 =
         0.02054    0.00578    0.00412    0.00278
C16   1    1.842733    0.070356   -0.338883    11.00000    0.02239    0.01653 =
         0.02606    0.01259    0.00670    0.00277
C38   1    1.652642   -0.001135   -0.411067    11.00000    0.02430    0.01715 =
         0.02466    0.00992    0.00313    0.00240
AFIX  23
H38A  2    1.605074    0.038101   -0.379311    11.00000   -1.20000
H38B  2    1.607653   -0.026955   -0.461848    11.00000   -1.20000
AFIX   0

N20   5    0.596558    0.245832    0.096455    11.00000    0.02641    0.03788 =
         0.04051    0.01619    0.00428    0.00291
C64   1    1.217163    0.399693    0.444547    11.00000    0.02390    0.02479 =
         0.01979    0.00877    0.00374    0.00505
C55   1    1.016389    0.076575    0.229236    11.00000    0.03291    0.01644 =
         0.02846    0.01062    0.01072    0.00529
AFIX  43
H55   2    1.023869    0.026535    0.194205    11.00000   -1.20000
AFIX   0
N19   5    0.565989    0.312478    0.109855    11.00000    0.02866    0.03967 =
         0.04151    0.01847    0.00539    0.00536

C13   1    1.743317    0.096436   -0.436436    11.00000    0.02640    0.02242 =
         0.02387    0.01199    0.00665    0.00450
C5    1    1.623723    0.391377   -0.309522    11.00000    0.03112    0.02043 =
         0.02769    0.01304    0.00577    0.00058
AFIX  43
H5    2    1.634108    0.416072   -0.338390    11.00000   -1.20000
AFIX   0

C65   1    1.123105    0.501239    0.423803    11.00000    0.02367    0.01661 =
         0.02218    0.00590    0.00682    0.00286
AFIX  23
H65A  2    1.059050    0.463700    0.390279    11.00000   -1.20000
H65B  2    1.100736    0.525532    0.474465    11.00000   -1.20000
AFIX   0

N10   5    1.562612   -0.123821   -0.327492    11.00000    0.05430    0.02898 =
         0.04772    0.02412    0.01279    0.00273
C19   1    1.878734    0.132405   -0.213381    11.00000    0.01909    0.02013 =
         0.02548    0.01470    0.00278    0.00138
C17   1    1.960260    0.071203   -0.317925    11.00000    0.02256    0.02323 =
         0.03016    0.01369    0.00693    0.00458
AFIX  43
H17   2    2.016360    0.049119   -0.350532    11.00000   -1.20000
AFIX   0

C56   1    1.042334    0.107527    0.307810    11.00000    0.03217    0.01965 =
         0.02934    0.01407    0.01092    0.00788
AFIX  43
H56   2    1.069911    0.081898    0.334885    11.00000   -1.20000
AFIX   0
C54   1    0.978558    0.131728    0.212773    11.00000    0.02795    0.01456 =
         0.02213    0.00707    0.00957    0.00352

C3    1    1.610566    0.370719   -0.211467    11.00000    0.01838    0.01725 =
         0.02223    0.00835    0.00260    0.00105
C4    1    1.633143    0.425077   -0.231097    11.00000    0.03100    0.01867 =
         0.02724    0.01070    0.00487   -0.00093
AFIX  43
H4A   2    1.651816    0.476334   -0.197828    11.00000   -1.20000
AFIX   0
C6    1    1.597004    0.316885   -0.336697    11.00000    0.02043    0.02032 =
         0.02273    0.01233    0.00250    0.00202

C42   1    1.384675    0.429925    0.328781    11.00000    0.02054    0.02715 =
         0.02540    0.00749    0.00582    0.00180
AFIX  43
H42   2    1.456837    0.449324    0.361152    11.00000   -1.20000
AFIX   0
C43   1    1.369437    0.395520    0.249532    11.00000    0.02201    0.02673 =
         0.02567    0.00807    0.00802    0.00190
AFIX  43
H43   2    1.429583    0.387721    0.219480    11.00000   -1.20000
AFIX   0

C25   1    1.810257    0.374222   -0.063661    11.00000    0.02421    0.02505 =
         0.02430    0.00899   -0.00058   -0.00242
AFIX  43
H25   2    1.829835    0.426028   -0.033959    11.00000   -1.20000
AFIX   0

C39   1    1.332440    0.518137    0.484481    11.00000    0.02662    0.03082 =
         0.02214    0.00472    0.00325   -0.00118
AFIX 137
H39A  2    1.402768    0.492578    0.487829    11.00000   -1.50000
H39B  2    1.304332    0.541159    0.532933    11.00000   -1.50000
H39C  2    1.351311    0.556572    0.470378    11.00000   -1.50000
AFIX   0

C18   1    1.983890    0.111012   -0.238604    11.00000    0.01952    0.02478 =
         0.03082    0.01528    0.00418    0.00334
AFIX  43
H18   2    2.058338    0.120885   -0.208803    11.00000   -1.20000
AFIX   0
C15   1    1.768168    0.035947   -0.414531    11.00000    0.02499    0.01940 =
         0.02587    0.01161    0.00533    0.00376
C1    1    1.606355    0.456155   -0.077854    11.00000    0.03074    0.01980 =
         0.02419    0.00620    0.00493    0.00253
AFIX 137
H1A   2    1.676359    0.483898   -0.077736    11.00000   -1.50000
H1B   2    1.606758    0.459466   -0.028400    11.00000   -1.50000
H1C   2    1.536189    0.477279   -0.090301    11.00000   -1.50000
AFIX   0
C24   1    1.878903    0.316394   -0.064113    11.00000    0.02200    0.02911 =
         0.02334    0.01172   -0.00028   -0.00153
AFIX  43
H24   2    1.952889    0.322795   -0.034816    11.00000   -1.20000
AFIX   0

C48   1    1.141454    0.262850    0.122710    11.00000    0.02462    0.01824 =
         0.01574    0.00624    0.00639    0.00143
C26   1    1.710444    0.341534   -0.114005    11.00000    0.02058    0.02054 =
         0.01888    0.00897    0.00372   -0.00001
C29   1    1.400747    0.262886   -0.081266    11.00000    0.02067    0.02662 =
         0.01779    0.00957    0.00673    0.00335
C76   1    0.824864    0.173140    0.145318    11.00000    0.02604    0.01886 =
         0.01794    0.00540    0.00615    0.00111
AFIX  23
H76A  2    0.765693    0.150007    0.161124    11.00000   -1.20000
H76B  2    0.842409    0.225347    0.184273    11.00000   -1.20000
AFIX   0

C23   1    1.819939    0.249885   -0.114074    11.00000    0.01606    0.02672 =
         0.01995    0.01348    0.00283    0.00106
C2    1    1.605982    0.374768   -0.135762    11.00000    0.02176    0.01861 =
         0.02107    0.00776    0.00286    0.00064
C14   1    1.834900   -0.022180   -0.472290    11.00000    0.03341    0.02700 =
         0.02860    0.01142    0.00936    0.00907
AFIX 137
H14A  2    1.905267    0.002049   -0.476627    11.00000   -1.50000
H14B  2    1.784567   -0.046170   -0.520706    11.00000   -1.50000
H14C  2    1.857581   -0.059627   -0.456510    11.00000   -1.50000
AFIX   0
N9    5    1.458608   -0.127044   -0.308065    11.00000    0.05747    0.03687 =
         0.05407    0.02654    0.01681   -0.00167

N15   5    1.030643    0.634619    0.348453    11.00000    0.05886    0.02841 =
         0.03743    0.01840    0.01124    0.00887
C67   1    1.026325    0.582870    0.372938    11.00000    0.04355    0.01782 =
         0.02210    0.00610    0.01404    0.01166
C27   1    1.491940    0.331194   -0.139650    11.00000    0.02066    0.02107 =
         0.01971    0.00852    0.00437    0.00235
AFIX  23
H27A  2    1.423965    0.354071   -0.153243    11.00000   -1.20000
H27B  2    1.490735    0.279596   -0.179859    11.00000   -1.20000
AFIX   0

C53   1    0.937953    0.131711    0.139420    11.00000    0.02658    0.01433 =
         0.01966    0.00525    0.00721    0.00103
C10   1    1.660528    0.197432   -0.433407    11.00000    0.02999    0.02193 =
         0.01960    0.01279    0.00325    0.00222
C45   1    1.079075    0.388438    0.147120    11.00000    0.03015    0.02249 =
         0.02435    0.01202    0.00421    0.00317
C36   1    1.564038   -0.075452   -0.356757    11.00000    0.03656    0.01525 =
         0.02591    0.00729    0.00189   -0.00457
N16   5    0.925195    0.645929    0.328692    11.00000    0.06079    0.03392 =
         0.03888    0.01889    0.01160    0.01228
C74   1    0.709188    0.239979    0.084837    11.00000    0.02665    0.03228 =
         0.01792    0.00979    0.00033    0.00199
C28   1    1.477690    0.328993   -0.067210    11.00000    0.02364    0.02629 =
         0.02027    0.00911    0.00564    0.00037
AFIX  23
H28A  2    1.555674    0.327513   -0.041693    11.00000   -1.20000
H28B  2    1.443401    0.374826   -0.033843    11.00000   -1.20000
AFIX   0
C30   1    1.429190    0.199750   -0.077950    11.00000    0.02514    0.02911 =
         0.02885    0.01491    0.00723    0.00467
AFIX  43
H30   2    1.504555    0.187926   -0.063829    11.00000   -1.20000
AFIX   0

C57   1    1.020598    0.180787    0.337643    11.00000    0.02933    0.01937 =
         0.02342    0.01319    0.00962    0.00548
C59   1    1.027049    0.239807    0.418004    11.00000    0.03537    0.02181 =
         0.02187    0.01282    0.00850    0.00887
C46   1    1.183469    0.342072    0.147035    11.00000    0.02550    0.01785 =
         0.02025    0.00820    0.00613    0.00041
C60   1    1.048843    0.202685    0.468385    11.00000    0.05089    0.03097 =
         0.02876    0.02067    0.01038    0.01060
AFIX 137
H60A  2    0.985923    0.164036    0.454833    11.00000   -1.50000
H60B  2    1.050428    0.239961    0.520494    11.00000   -1.50000
H60C  2    1.124129    0.180295    0.462079    11.00000   -1.50000
AFIX   0
C61   1    1.125579    0.298074    0.438502    11.00000    0.03256    0.02362 =
         0.01990    0.01269    0.00609    0.00907
C63   1    1.290278    0.375009    0.485353    11.00000    0.03192    0.03784 =
         0.03450    0.02067   -0.00269    0.00460
AFIX  43
H63   2    1.365841    0.396814    0.511695    11.00000   -1.20000
AFIX   0
C51   1    1.031850    0.168293    0.119262    11.00000    0.02515    0.01462 =
         0.01707    0.00462    0.00562    0.00109
C49   1    1.179619    0.197758    0.072256    11.00000    0.02869    0.01879 =
         0.02467    0.00416    0.01211    0.00060
AFIX  43
H49   2    1.241175    0.193150    0.043911    11.00000   -1.20000
AFIX   0

C37   1    1.670822   -0.056955   -0.380445    11.00000    0.03141    0.01719 =
         0.02741    0.01063    0.00101    0.00004
AFIX  23
H37A  2    1.696601   -0.103159   -0.419320    11.00000   -1.20000
H37B  2    1.734169   -0.036227   -0.337296    11.00000   -1.20000
AFIX   0

C68   1    0.912308    0.561634    0.368571    11.00000    0.04140    0.02694 =
         0.03053    0.01473    0.01236    0.01522
AFIX  43
H68   2    0.882007    0.526639    0.382006    11.00000   -1.20000
AFIX   0
C66   1    1.137231    0.559318    0.397164    11.00000    0.03714    0.01768 =
         0.03157    0.01055    0.01385    0.00546
AFIX  23
H66A  2    1.183213    0.603646    0.438096    11.00000   -1.20000
H66B  2    1.183035    0.539094    0.355066    11.00000   -1.20000
AFIX   0

C12   1    1.797880    0.117612   -0.480132    11.00000    0.04348    0.03454 =
         0.04068    0.02474    0.02260    0.01434
AFIX  43
H12A  2    1.859820    0.094085   -0.506908    11.00000   -1.20000
AFIX   0
C9    1    1.572354    0.288630   -0.469782    11.00000    0.04372    0.02937 =
         0.02685    0.01889    0.00234    0.00404
AFIX 137
H9A   2    1.515691    0.326585   -0.458583    11.00000   -1.50000
H9B   2    1.551233    0.249538   -0.521264    11.00000   -1.50000
H9C   2    1.650882    0.311331   -0.463632    11.00000   -1.50000
AFIX   0

C50   1    1.110353    0.138391    0.070049    11.00000    0.02895    0.01706 =
         0.02427    0.00413    0.01074    0.00138
AFIX  43
H50   2    1.117293    0.086951    0.039732    11.00000   -1.20000
AFIX   0
C52   1    0.912149    0.050867    0.078816    11.00000    0.03601    0.01550 =
         0.02381    0.00374    0.01081   -0.00085
C75   1    0.773112    0.172119    0.072024    11.00000    0.02966    0.03028 =
         0.02045    0.00968    0.00422    0.00311
AFIX  23
H75A  2    0.836988    0.169070    0.042797    11.00000   -1.20000
H75B  2    0.718396    0.127361    0.042476    11.00000   -1.20000
AFIX   0

C35   1    1.455335   -0.049330   -0.355923    11.00000    0.03492    0.02387 =
         0.03348    0.01332    0.00488   -0.00512
AFIX  43
H35   2    1.428586   -0.015240   -0.373222    11.00000   -1.20000
AFIX   0
C7    1    1.571193    0.254914   -0.416415    11.00000    0.02947    0.02134 =
         0.02074    0.01199    0.00113    0.00226
C20   1    1.743349    0.127670   -0.129619    11.00000    0.02379    0.03278 =
         0.03012    0.02150    0.00370    0.00071
AFIX 137
H20A  2    1.675441    0.126157   -0.164423    11.00000   -1.50000
H20B  2    1.724594    0.152402   -0.078639    11.00000   -1.50000
H20C  2    1.763170    0.076909   -0.142047    11.00000   -1.50000
AFIX   0

C47   1    1.261227    0.343444    0.092195    11.00000    0.03620    0.02853 =
         0.02608    0.01240    0.01190   -0.00146
AFIX 137
H47A  2    1.287506    0.394931    0.106907    11.00000   -1.50000
H47B  2    1.216550    0.321038    0.041923    11.00000   -1.50000
H47C  2    1.329453    0.315240    0.092616    11.00000   -1.50000
AFIX   0

C11   1    1.745388    0.180974   -0.478283    11.00000    0.04510    0.03419 =
         0.03746    0.02472    0.01936    0.01189
AFIX  43
H11A  2    1.765737    0.207409   -0.503844    11.00000   -1.20000
AFIX   0

C58   1    0.909987    0.275607    0.429224    11.00000    0.03599    0.02372 =
         0.02203    0.01067    0.00946    0.00783
AFIX 137
H58A  2    0.896686    0.300965    0.398423    11.00000   -1.50000
H58B  2    0.912046    0.311649    0.481809    11.00000   -1.50000
H58C  2    0.846398    0.237091    0.414612    11.00000   -1.50000
AFIX   0
C73   1    0.749695    0.305756    0.090647    11.00000    0.02789    0.03469 =
         0.03050    0.01578    0.00575    0.00583
AFIX  43
H73   2    0.825773    0.318492    0.084793    11.00000   -1.20000
AFIX   0

C8    1    1.449185    0.216202   -0.429456    11.00000    0.02922    0.02595 =
         0.02955    0.01471   -0.00108    0.00183
AFIX 137
H8A   2    1.447945    0.193667   -0.396177    11.00000   -1.50000
H8B   2    1.431579    0.177517   -0.481375    11.00000   -1.50000
H8C   2    1.390289    0.252758   -0.419127    11.00000   -1.50000
AFIX   0
C21   1    1.848879    0.171152   -0.135538    11.00000    0.01933    0.02669 =
         0.02479    0.01597    0.00266    0.00245

C62   1    1.232818    0.311139    0.481145    11.00000    0.03675    0.03538 =
         0.03167    0.02029    0.00012    0.00733
AFIX  43
H62   2    1.263437    0.282256    0.504009    11.00000   -1.20000
AFIX   0

C22   1    1.954487    0.173030   -0.080739    11.00000    0.02365    0.04055 =
         0.02794    0.02204    0.00191    0.00545
AFIX 137
H22A  2    1.970512    0.122161   -0.091183    11.00000   -1.50000
H22B  2    1.937137    0.200568   -0.029612    11.00000   -1.50000
H22C  2    2.023214    0.197561   -0.086448    11.00000   -1.50000
AFIX   0

C72   1    0.656072    0.427042    0.125906    11.00000    0.03820    0.03870 =
         0.04521    0.02073    0.00514    0.00916
AFIX  23
H72A  2    0.574539    0.438030    0.115259    11.00000   -1.20000
H72B  2    0.704488    0.438877    0.095402    11.00000   -1.20000
AFIX   0

C80   1    1.128318    0.408821   -0.099170    11.00000    0.03690    0.03062 =
         0.02985    0.01303    0.00024    0.00038
AFIX  23
H80A  2    1.210070    0.429525   -0.090366    11.00000   -1.20000
H80B  2    1.109029    0.412203   -0.051864    11.00000   -1.20000
AFIX   0

C31   1    1.304594    0.084179   -0.103764    11.00000    0.04494    0.03081 =
         0.04858    0.01973    0.01485    0.00367
AFIX  23
H31A  2    1.220218    0.077152   -0.102066    11.00000   -1.20000
H31B  2    1.348770    0.083594   -0.059258    11.00000   -1.20000
AFIX   0
C33   1    1.262820    0.007528   -0.242587    11.00000    0.04173    0.04085 =
         0.04831    0.01794    0.01583   -0.00176
AFIX  23
H33A  2    1.287236    0.045774   -0.256367    11.00000   -1.20000
H33B  2    1.179871    0.013224   -0.234605    11.00000   -1.20000
AFIX   0

C79   1    1.045927    0.452305   -0.125050    11.00000    0.04245    0.03156 =
         0.03184    0.01213   -0.00024    0.00445
AFIX 137
H79A  2    1.061082    0.445156   -0.173980    11.00000   -1.50000
H79B  2    1.058499    0.505181   -0.089146    11.00000   -1.50000
H79C  2    0.964788    0.434768   -0.128802    11.00000   -1.50000
AFIX   0

C71   1    0.703135    0.475511    0.209759    11.00000    0.03966    0.04098 =
         0.04571    0.01695    0.00061    0.01075
AFIX  23
H71A  2    0.661644    0.458071    0.239175    11.00000   -1.20000
H71B  2    0.787316    0.468324    0.218445    11.00000   -1.20000
AFIX   0
C70   1    0.688971    0.556726    0.237539    11.00000    0.04367    0.04410 =
         0.04197    0.02235    0.00710    0.01411
AFIX  23
H70A  2    0.605795    0.563933    0.225508    11.00000   -1.20000
H70B  2    0.736089    0.575482    0.211445    11.00000   -1.20000
AFIX   0

C32   1    1.336217    0.019760   -0.171903    11.00000    0.04573    0.03253 =
         0.04916    0.01458    0.01568    0.00370
AFIX  23
H32A  2    1.419328    0.028040   -0.175549    11.00000   -1.20000
H32B  2    1.328465   -0.025791   -0.166179    11.00000   -1.20000
AFIX   0

C69   1    0.726659    0.601054    0.320411    11.00000    0.04845    0.04444 =
         0.04121    0.01997    0.00940    0.02096
AFIX  23
H69A  2    0.704064    0.652578    0.337324    11.00000   -1.20000
H69B  2    0.685351    0.579186    0.346324    11.00000   -1.20000
AFIX   0

C34   1    1.273612   -0.070749   -0.307608    11.00000    0.04424    0.04108 =
         0.04772    0.01529    0.01484   -0.01066
AFIX  23
H34A  2    1.248007   -0.108919   -0.294042    11.00000   -1.20000
H34B  2    1.220676   -0.077190   -0.352543    11.00000   -1.20000
AFIX   0

C84   1    1.282574    0.159560   -0.302277    11.00000    0.07088    0.11447 =
         0.06876    0.04317    0.01077    0.02090
AFIX  23
H84A  2    1.222568    0.131467   -0.292383    11.00000   -1.20000
H84B  2    1.326111    0.195018   -0.253177    11.00000   -1.20000
AFIX   0
C83   1    1.224899    0.200114   -0.329847    11.00000    0.18131    0.23949 =
         0.14324    0.14770    0.12420    0.15042
AFIX 137
H83A  2    1.171024    0.167314   -0.374792    11.00000   -1.50000
H83B  2    1.280992    0.227466   -0.342432    11.00000   -1.50000
H83C  2    1.180358    0.235322   -0.292550    11.00000   -1.50000
AFIX   0

C78   1    1.452465    0.101046    0.109954    11.00000    0.07193    0.06354 =
         0.07173    0.03363    0.00912   -0.00235
PART 2
AFIX  23
H78C  2    1.421514    0.147198    0.145498    10.50000   -1.20000
H78D  2    1.531183    0.099138    0.134339    10.50000   -1.20000
AFIX  23
PART 0
PART 1
H78A  2    1.534727    0.091937    0.121661    10.50000   -1.20000
H78B  2    1.442879    0.094038    0.058227    10.50000   -1.20000
AFIX   0
PART 0
C77   1    1.380351    0.040601    0.107933    11.00000    0.05590    0.06546 =
         0.10120    0.04902   -0.00239   -0.00308
AFIX 137
H77A  2    1.298396    0.043556    0.090602    11.00000   -1.50000
H77B  2    1.387107    0.044764    0.158045    11.00000   -1.50000
H77C  2    1.407130   -0.007105    0.073795    11.00000   -1.50000
AFIX   0
PART 2
O3A   6    1.471990    0.113172    0.051407    10.50000    0.07749    0.06356 =
         0.06705    0.02804    0.00464   -0.01491
AFIX  83
H3A   2    1.475259    0.072268    0.013675    10.50000   -1.50000
AFIX   0

PART 0
F2    4    0.975909    0.335218    0.285626    11.00000    0.02318    0.01640 =
         0.02194    0.00734    0.00560    0.00332

O4    6    0.791685    0.398802    0.345398    11.00000    0.03777    0.04182 =
         0.03802    0.01644    0.01781    0.01656
AFIX 147
H4B   2    0.849555    0.374948    0.329073    11.00000   -1.50000
AFIX   0
C82   1    0.691053    0.359193    0.301245    11.00000    0.04092    0.05094 =
         0.04511    0.02218    0.01278    0.01079
AFIX  23
H82A  2    0.701583    0.340256    0.248369    11.00000   -1.20000
H82B  2    0.626743    0.392838    0.310866    11.00000   -1.20000
AFIX   0
C81   1    0.656247    0.295105    0.313583    11.00000    0.05781    0.05326 =
         0.04986    0.02333    0.00160   -0.00106
AFIX 137
H81A  2    0.591365    0.264455    0.275099    11.00000   -1.50000
H81B  2    0.631416    0.313788    0.362830    11.00000   -1.50000
H81C  2    0.723168    0.265109    0.310900    11.00000   -1.50000
AFIX   0

PART 1
CS2A  3    1.277974    0.230930    0.280629    10.85000    0.04043    0.02968 =
         0.05055    0.02413    0.00374    0.01037

CS2D  3    1.312389    0.245599    0.297020    10.05000    0.04043    0.02968 =
         0.05055    0.02413    0.00374    0.01037
CS2B  3    1.249075    0.228285    0.284704    10.05000    0.04043    0.02968 =
         0.05055    0.02413    0.00374    0.01037
CS2C  3    1.278216    0.217061    0.261106    10.05000    0.04043    0.02968 =
         0.05055    0.02413    0.00374    0.01037
O3B   6    1.443523    0.166958    0.149779    10.50000    0.04854    0.05848 =
         0.05540    0.03692    0.01767   -0.00203
AFIX  83
H3B   2    1.407991    0.185337    0.124346    10.50000   -1.50000
AFIX   0

PART 0
H45A  2    1.026526    0.393161    0.179687    11.00000    0.02204
H52A  2    0.887095    0.049054    0.031273    11.00000    0.03058
H52B  2    0.979494    0.023629    0.075922    11.00000    0.02715
H45B  2    1.108040    0.439391    0.163626    11.00000    0.02209
H45C  2    1.036259    0.365755    0.098464    11.00000    0.04627
H52C  2    0.844889    0.024395    0.087128    11.00000    0.04035
HKLF 4

REM  2016sot0010a_r_100k_a.res in P-1
REM R1 =  0.0532 for   17410 Fo > 4sig(Fo)  and  0.0697 for all   21736 data
REM   1068 parameters refined using    890 restraints

END

WGHT      0.0492     10.8059

REM Highest difference peak  2.354,  deepest hole -1.323,  1-sigma level  0.095
Q1    1   1.2817  0.1940 -0.3023  11.00000  0.05    1.71
Q2    1   0.6518  0.4965  0.2551  11.00000  0.05    1.25
Q3    1   1.9347  0.2495 -0.3094  11.00000  0.05    1.23
Q4    1   1.2910 -0.0506 -0.2334  11.00000  0.05    1.05
Q5    1   0.8535  0.6307  0.3276  11.00000  0.05    1.04
Q6    1   1.3214  0.0361 -0.2057  11.00000  0.05    1.01
Q7    1   0.8004  0.5743  0.3357  11.00000  0.05    0.96
Q8    1   0.7071  0.4908  0.1789  11.00000  0.05    0.90
Q9    1   1.8191  0.2624 -0.2995  11.00000  0.05    0.88
Q10   1   1.9846  0.2657 -0.2592  11.00000  0.05    0.70
Q11   1   0.9638  0.6274  0.3497  11.00000  0.05    0.70
Q12   1   1.3056 -0.1069 -0.3202  11.00000  0.05    0.64
Q13   1   0.6994  0.3168  0.3008  11.00000  0.05    0.61
Q14   1   1.8989  0.3083 -0.2749  11.00000  0.05    0.58
Q15   1   0.5666  0.2931  0.3189  11.00000  0.05    0.51
Q16   1   1.6212 -0.1414 -0.3461  11.00000  0.05    0.51
Q17   1   1.0626  0.3229 -0.2400  11.00000  0.05    0.50
Q18   1   1.6106 -0.0788 -0.3742  11.00000  0.05    0.50
Q19   1   1.4954  0.1910  0.1427  11.00000  0.05    0.49
Q20   1   1.3844  0.4189  0.2895  11.00000  0.05    0.47
;
_shelx_res_checksum               13160
_shelx_hkl_file
;
   0   0   2 3171.71   14.73
   0   0   2 1491.70    4.43
   0   0   2 3047.33    8.00
   0   0  -2 3384.28    7.11
   0   0   3  436.05    3.84
   0   0   3  449.93    7.24
   0   0  -3  396.39    3.71
   0   0   3  419.17    3.32
   0   0  -3  451.92    3.33
   0   0  -3  476.59    3.30
   0   0   3  471.71    3.14
   0   0   4  886.50    5.35
   0   0   4  864.60   10.60
   0   0   4  866.51    6.06
   0   0   4  863.53    4.68
   0   0  -4  873.58    5.18
   0   0   5 9964.07   38.82
   0   0   5 9407.21   17.20
   0   0  -5 9999.00   19.46
   0   0   5 9512.63   22.44
   0   0   6  969.25   13.10
   0   0  -6  952.80    6.71
   0   0   6  947.20    6.03
   0   0   7  867.91    6.18
   0   0  -7  889.38    6.97
   0   0   7  877.41   13.30
   0   0   8   10.88    1.01
   0   0   8    7.34    1.19
   0   0   8    6.92    2.36
   0   0  -8    7.98    1.10
   0   0   9   51.13    1.81
   0   0   9   49.33    3.89
   0   0  -9   47.38    2.01
   0   0   9   47.01    2.24
   0   0 -10   56.35    2.25
   0   0  10   52.80    1.96
   0   0  10   58.55    4.24
   0   0  10   54.98    2.48
   0   0  11  108.26    3.58
   0   0  11  102.22    5.54
   0   0 -11  107.34    3.14
   0   0  11  109.75    2.93
   0   0 -12   16.99    1.61
   0   0  12   15.15    1.39
   0   0  12   12.31    2.88
   0   0  12   13.08    1.68
   0   0  13  182.79    5.20
   0   0 -13  171.90    4.34
   0   0  13  172.92    7.30
   0   0  13  184.08    4.20
   0   0  14  645.52    8.20
   0   0  14  641.15   13.85
   0   0  14  630.33    9.83
   0   0  15   62.98    2.82
   0   0  15   55.83    3.18
   0   0  16  356.20    6.74
   0   0  16  357.71    7.89
   0   0  17   -0.28    1.24
   0   0  17    3.44    1.66
   0   0  18   53.70    3.04
   0   0  18   50.72    3.53
   0   0  19    1.57    1.72
   0   0  19    1.36    1.36
   0   0 -20  122.49    8.49
   0   0  20  123.98    5.51
   0   0  21   54.29    3.54
   0   0  21   60.60    4.03
   0   0 -21   60.16    6.65
   0   0  22    7.71    2.13
   0   0 -22    5.61    4.10
   0   0  22    9.56    2.42
   0   0  23   33.01    3.18
   0   0 -23   38.45    5.74
   0   0 -24   11.93    4.82
   0   0  24   10.37    2.36
   0  -1  25    7.47    2.33
   0  -1  24    4.02    1.93
   0   1 -24    0.24    3.73
   0   1 -23    4.32    4.06
   0  -1  23    4.57    1.87
   0  -1  23    4.00    2.00
   0   1 -22   -5.34    3.70
   0  -1  22   -1.52    1.72
   0  -1  22   -0.87    1.50
   0  -1  21    1.17    1.41
   0  -1  21    0.01    1.65
   0  -1  20    7.35    1.72
   0  -1  20    6.85    2.12
   0  -1  19   18.86    2.44
   0  -1  19   18.61    2.06
   0  -1  18    0.39    1.07
   0  -1  18    0.52    1.51
   0  -1  17    9.60    1.58
   0  -1  17    8.31    1.81
   0  -1  17   10.18    3.31
   0  -1  16   14.40    1.61
   0  -1  16   15.25    2.05
   0  -1  15    6.01    3.08
   0  -1  15    5.41    1.21
   0  -1  15    6.74    1.74
   0  -1  14   17.75    1.54
   0  -1  14   18.79    2.01
   0  -1  14   18.69    3.50
   0  -1  13    1.13    2.82
   0  -1  13    1.80    0.87
   0  -1  13    0.73    1.11
   0  -1  12    3.44    0.86
   0  -1  12    5.39    1.29
   0  -1  11    8.37    0.98
   0  -1  11    9.69    3.07
   0  -1  11    9.08    1.39
   0  -1  10   13.58    3.13
   0  -1  10   12.80    1.46
   0  -1  10   12.75    1.08
   0   1 -10   15.70    1.30
   0   1  -9   52.92    1.95
   0  -1   9   57.91    2.38
   0  -1   9   58.10    4.60
   0  -1   9   60.19    1.88
   0  -1   8   20.76    1.53
   0  -1   8   16.08    3.42
   0   1  -8   18.11    1.20
   0  -1   8   19.43    1.09
   0  -1   7   45.27    1.87
   0  -1   7   48.85    1.52
   0   1  -7   43.16    1.56
   0  -1   6   49.87    4.19
   0   1  -6   45.48    1.44
   0  -1   6   44.71    1.73
   0  -1   6   47.49    1.39
   0  -1   5   18.99    3.09
   0   1  -5   19.32    0.94
   0  -1   5   21.60    1.01
   0  -1   5   19.31    0.88
   0  -1   5   18.54    1.10
   0  -1   4   10.76    0.79
   0  -1   4    9.40    0.64
   0  -1   4   10.88    3.37
   0  -1   4   12.17    0.65
   0   1  -4   12.63    0.80
   0   1  -4   13.26    0.89
   0   1  -4   10.61    0.64
   0  -1   3   11.19    0.52
   0   1  -3   10.42    0.64
   0  -1   3   11.39    0.66
   0  -1   3   10.32    0.59
   0   1  -3    9.51    0.66
   0  -1   2    0.03    0.15
   0   1  -2   -0.19    0.18
   0   1  -2   -0.08    0.16
   0  -1   2   -0.17    0.18
   0   1   1    0.00    0.11
   0   1   1    0.14    0.12
   0  -1  -1   -0.16    0.13
   0  -1  -1   -0.13    0.11
   0  -1  -2    3.38    0.50
   0  -1  -2    2.49    0.33
   0  -1  -2    2.77    1.82
   0   1   2    2.21    0.44
   0   1   2    2.70    1.21
   0   1   2    2.98    0.48
   0  -1  -2    2.43    0.46
   0   1   2    2.94    0.36
   0   1   3   57.02    3.49
   0   1   3   62.53    2.04
   0   1   3   61.60    1.27
   0  -1  -3   63.78    1.68
   0   1   3   57.26    1.52
   0  -1  -3   62.21    1.45
   0  -1  -3   66.35    2.57
   0   1   3   60.10    1.42
   0  -1  -4    2.56    1.86
   0  -1  -4    3.66    0.69
   0   1   4    4.83    0.58
   0   1   4    0.01    2.72
   0   1   4    3.47    0.71
   0   1   4    6.37    1.42
   0  -1  -5    9.08    2.55
   0   1   5    8.49    0.73
   0  -1  -5    9.89    0.90
   0   1   5    8.21    0.96
   0   1   5    8.82    1.59
   0   1   6   17.15    2.14
   0  -1  -6   14.23    1.09
   0   1   6   13.37    0.93
   0   1   6   13.48    1.19
   0   1   7   10.63    1.17
   0   1   7   11.18    1.91
   0  -1  -7   11.49    1.10
   0   1   7    9.49    0.91
   0   1   8   27.55    2.60
   0  -1  -8   27.73    1.59
   0   1   8   31.89    1.50
   0   1   8   27.90    1.76
   0   1   9    5.77    1.18
   0   1   9    7.42    1.99
   0  -1  -9    7.06    1.08
   0   1   9    4.75    0.91
   0   1  10    1.04    1.10
   0   1  10    0.62    0.72
   0  -1 -10    1.17    1.00
   0   1  10    4.08    1.99
   0   1  11    0.32    1.04
   0   1  11    3.42    0.93
   0  -1 -11    2.40    1.08
   0   1  11    1.85    1.94
   0  -1 -12   18.29    1.72
   0   1  12   16.93    1.79
   0   1  12   15.50    1.46
   0  -1 -13    8.43    1.43
   0   1  13    7.08    1.46
   0   1  13    6.76    1.19
   0   1  14  100.58    4.12
   0   1  14  100.93    3.53
   0  -1 -14   94.99    3.54
   0   1  15    3.23    1.20
   0   1  15    3.86    1.58
   0   1  16   10.78    1.90
   0   1  16   10.35    1.64
   0   1  17    2.14    1.60
   0   1  17    2.64    1.22
   0   1  18    4.74    1.41
   0   1  18    3.46    1.83
   0  -1 -19   28.83    4.84
   0   1  19   25.96    2.54
   0   1  19   18.21    2.49
   0   1  20    2.58    1.81
   0  -1 -20   -2.15    3.48
   0   1  20    0.62    1.54
   0  -1 -21   13.15    4.49
   0   1  21   15.70    2.77
   0   1  22    6.42    2.20
   0   1  22    1.93    1.81
   0   1  23   10.50    2.45
   0  -1 -23    7.41    4.25
   0   1  24    2.82    2.17
   0   2 -25   32.73    5.64
   0  -2  25   40.52    3.50
   0   2 -24   -0.81    4.10
   0  -2  24    4.21    1.83
   0  -2  23   27.12    2.72
   0   2 -23   30.53    5.40
   0  -2  23   25.66    3.12
   0  -2  22    0.12    1.67
   0  -2  22    1.41    1.49
   0  -2  21   84.83    3.96
   0  -2  21   82.33    4.46
   0  -2  20  127.33    5.26
   0  -2  20  128.86    4.58
   0  -2  19   25.32    2.13
   0  -2  19   25.93    2.61
   0  -2  19   25.46    4.65
   0  -2  18   68.19    3.13
   0  -2  18   55.47    3.64
   0  -2  18   59.91    6.03
   0  -2  17    4.22    1.13
   0  -2  17    2.26    1.50
   0  -2  17    1.45    3.25
   0  -2  16  556.09    9.37
   0  -2  16  538.06   14.99
   0  -2  16  552.15    7.66
   0  -2  15   96.80    6.87
   0  -2  15   91.77    3.86
   0  -2  15   88.72    3.07
   0  -2  14  408.73    5.97
   0  -2  14  417.26    7.62
   0  -2  13   37.29    1.86
   0  -2  13   39.98    2.49
   0  -2  13   39.84    4.95
   0  -2  12   10.35    1.46
   0  -2  12   12.54    1.15
   0  -2  11  802.29   17.51
   0  -2  11  827.72    7.48
   0  -2  10  259.23   10.01
   0  -2  10  258.88    4.89
   0  -2  10  278.81    4.12
   0  -2   9 1467.39    8.85
   0  -2   9 1471.59   10.92
   0  -2   8   26.88    1.43
   0  -2   8   20.20    1.51
   0  -2   8   24.96    4.38
   0  -2   7 1499.45    8.09
   0  -2   7 1503.67    9.60
   0   2  -6 1915.56   27.94
   0  -2   6 1929.54    8.68
   0  -2   6 1947.02    9.98
   0  -2   5 2349.50    9.78
   0  -2   5 2376.37    9.38
   0  -2   4  103.17    1.90
   0   2  -4  111.90    2.00
   0   2  -4  110.51    2.32
   0  -2   4  105.82    2.00
   0   2  -3  128.15    1.75
   0   2  -3  166.17    2.41
   0  -2   3  157.26    2.21
   0  -2   3  119.33    1.60
   0  -2   2  441.99    3.26
   0   2  -2  709.18    4.16
   0  -2   1    0.02    0.17
   0  -2   0   -0.08    0.13
   0  -2   0   18.62    2.18
   0  -2  -1  750.88    5.48
   0   2   1  746.42    3.94
   0  -2  -1  753.97    4.11
   0  -2  -1  767.84    4.14
   0   2   1  746.52    4.18
   0   2   2  266.25    2.74
   0  -2  -2  271.66    3.09
   0   2   2  275.20    3.42
   0   2   2  273.00    2.95
   0   2   2  271.33    2.95
   0  -2  -2  261.02    2.79
   0  -2  -2  221.96    2.38
   0  -2  -2  219.47    3.98
   0   2   3    4.28    0.99
   0  -2  -3    3.45    2.76
   0   2   3    5.77    1.57
   0  -2  -3    3.48    1.02
   0   2   3    8.52    1.01
   0  -2  -3    8.42    0.98
   0   2   4 1563.18    7.73
   0   2   4 1584.90    8.96
   0  -2  -4 1551.58   12.36
   0   2   5 4343.54   16.25
   0  -2  -5 4302.51   25.19
   0   2   5 4280.15   13.82
   0   2   6  134.75    3.17
   0  -2  -6  136.13    2.95
   0   2   6  131.27    2.69
   0   2   7 3297.68   16.36
   0  -2  -7 3284.72   14.90
   0  -2  -8    2.08    0.90
   0   2   8    0.46    0.91
   0   2   8    2.11    0.84
   0   2   9  507.13    7.24
   0  -2  -9  503.31    6.53
   0   2   9  497.60    6.13
   0   2  10   17.97    1.41
   0   2  10   16.75    1.70
   0  -2 -10   18.12    1.58
   0   2  11  290.26    5.24
   0   2  11  301.17    6.31
   0  -2 -12  387.24    6.66
   0   2  12  397.62    7.50
   0   2  12  395.32    6.37
   0  -2 -13  289.34    6.03
   0   2  13  288.56    5.83
   0   2  13  293.09    6.60
   0  -2 -14  227.29    5.60
   0   2  14  245.21    6.34
   0   2  14  231.27    5.43
   0   2  15   22.14    2.08
   0  -2 -15   20.47    2.14
   0   2  15   16.42    2.22
   0   2  16   47.43    2.88
   0   2  16   47.12    3.29
   0   2  17    6.94    2.04
   0  -2 -17    6.49    3.39
   0   2  17    4.01    1.44
   0   2  18   86.57    4.96
   0  -2 -18   97.72    7.52
   0   2  19    4.81    2.13
   0   2  19    3.74    1.67
   0  -2 -20    6.99    3.19
   0   2  20    7.54    2.17
   0   2  20    8.51    2.12
   0   2  21    7.02    2.02
   0  -2 -21    4.29    3.56
   0   2  21   12.46    2.59
   0   2  22    4.88    2.12
   0  -2 -22    1.30    3.52
   0  -2 -23   26.95    5.37
   0   2  23   21.89    3.15
   0  -3  26    0.94    1.98
   0   3 -25   14.22    5.04
   0  -3  25   14.54    2.38
   0   3 -24    5.21    4.32
   0  -3  24    3.27    1.65
   0  -3  23    2.70    1.59
   0  -3  23   -0.17    1.63
   0  -3  22    0.81    1.50
   0  -3  22   -1.41    1.69
   0  -3  21    3.67    3.80
   0  -3  21   -0.45    1.28
   0  -3  21    1.07    1.71
   0  -3  20   20.93    2.61
   0  -3  20   17.76    4.27
   0  -3  20   27.97    2.33
   0  -3  19    6.08    1.83
   0  -3  19    9.02    1.54
   0  -3  19    8.21    3.91
   0  -3  18    2.96    1.12
   0  -3  18    5.51    1.69
   0  -3  17    0.43    1.32
   0  -3  17    0.49    1.03
   0  -3  16    3.70    1.06
   0  -3  16    5.75    4.04
   0  -3  16    4.28    1.46
   0  -3  15    3.04    1.03
   0  -3  15    4.55    1.35
   0  -3  15    4.72    3.63
   0  -3  14   27.94    1.74
   0  -3  14   29.05    2.20
   0  -3  14   26.74    4.72
   0  -3  13   13.85    3.99
   0  -3  13   12.74    1.64
   0  -3  13   14.51    1.32
   0  -3  12   24.94    1.93
   0  -3  12   26.43    1.52
   0  -3  12   30.45    4.66
   0  -3  11    2.72    1.01
   0  -3  11    3.61    3.45
   0  -3  11    2.73    0.79
   0  -3  10   18.37    1.49
   0  -3  10   20.03    1.29
   0  -3  10   19.63    4.36
   0  -3   9    7.80    1.06
   0  -3   9    5.40    0.83
   0  -3   8   11.69    1.01
   0   3  -8   14.15    5.58
   0  -3   8   11.89    1.12
   0   3  -7   17.01    5.23
   0  -3   7   15.20    1.12
   0  -3   7   13.16    1.07
   0  -3   6    6.67    0.80
   0  -3   6    6.87    0.85
   0  -3   5    0.61    0.50
   0  -3   5   -0.16    0.65
   0  -3   4    1.39    0.42
   0   3  -4    0.89    0.67
   0   3  -4    1.28    0.41
   0  -3   4    1.31    0.64
   0  -3   3    0.76    0.27
   0   3  -3    1.09    0.55
   0  -3   3    0.58    0.49
   0   3  -3    1.56    0.31
   0   3  -2    3.06    0.27
   0   3  -2    2.38    0.46
   0  -3   2    3.20    0.26
   0  -3   2    2.83    0.44
   0  -3   1    3.87    0.30
   0   3  -1    3.65    0.32
   0   3   0    1.36    0.29
   0   3   0    1.51    0.41
   0  -3   0    1.49    0.40
   0  -3   0    0.90    0.23
   0  -3   0    1.75    0.38
   0  -3   0    1.48    0.43
   0   3   0    1.29    0.33
   0  -3   0    1.55    0.31
   0  -3   0    1.45    0.33
   0   3   0    0.75    0.49
   0  -3  -1    9.97    0.66
   0  -3  -1    9.87    0.71
   0  -3  -1   10.66    0.96
   0  -3  -1   11.23    0.51
   0   3   1   10.22    0.43
   0   3   1    9.95    0.63
   0   3   2    0.92    0.53
   0  -3  -2    1.75    0.64
   0  -3  -2    0.85    1.09
   0  -3  -2    1.10    1.04
   0   3   2    0.57    0.43
   0   3   3   17.99    1.02
   0   3   3   17.79    1.09
   0  -3  -3   17.80    1.07
   0  -3  -3   18.45    2.34
   0   3   3   21.03    1.32
   0   3   4   76.13    2.21
   0  -3  -4   73.94    2.04
   0   3   4   82.31    2.06
   0  -3  -4   78.46    2.68
   0   3   5    0.38    0.71
   0   3   5   -0.15    0.68
   0  -3  -5   -1.06    1.43
   0  -3  -5    0.14    0.76
   0  -3  -6  106.75    2.77
   0   3   6  110.98    2.69
   0   3   6  103.52    2.90
   0  -3  -7    4.58    1.07
   0   3   7    4.82    1.15
   0   3   7    6.62    1.06
   0  -3  -8    2.33    0.94
   0   3   8    2.41    0.77
   0   3   8    1.76    1.01
   0   3   9    2.15    1.15
   0  -3  -9    2.94    1.10
   0   3   9    1.77    0.82
   0   3  10    1.37    0.83
   0  -3 -10    1.24    1.03
   0   3  10    0.30    1.07
   0   3  11    1.94    1.07
   0   3  11    0.37    0.92
   0  -3 -11    1.81    1.17
   0  -3 -12   -0.22    1.19
   0   3  12    1.29    1.29
   0   3  12    2.27    1.22
   0  -3 -13   11.65    1.77
   0   3  13   11.30    1.58
   0   3  13   13.58    2.01
   0   3  14    0.64    1.24
   0   3  14    1.80    1.46
   0  -3 -14    3.25    1.42
   0  -3 -15    9.67    3.24
   0   3  15   13.29    2.02
   0   3  15   13.61    1.92
   0  -3 -15   15.04    1.98
   0  -3 -16    6.97    1.80
   0   3  16    8.18    1.90
   0   3  16   11.61    1.79
   0  -3 -16    9.64    3.40
   0  -3 -17    5.23    3.24
   0   3  17    5.29    1.81
   0   3  17   11.14    1.90
   0  -3 -18    1.94    3.19
   0   3  18    2.01    1.60
   0   3  18    2.55    1.72
   0   3  19    0.39    1.64
   0  -3 -19    1.49    3.61
   0   3  19    0.60    1.63
   0   3  20    3.79    2.03
   0  -3 -20    7.24    3.51
   0   3  20    3.30    1.71
   0   3  21    3.31    2.14
   0  -3 -21    4.35    3.66
   0   3  21    4.58    2.06
   0  -3 -22    3.50    3.92
   0   3  22    2.02    1.84
   0   3  23    9.84    2.62
   0   4 -26    8.98    4.75
   0   4 -26    8.97    5.69
   0  -4  26   12.25    2.32
   0  -4  25   38.94    3.18
   0   4 -25   39.09    6.03
   0  -4  24   14.66    2.21
   0  -4  23   10.26    2.18
   0  -4  23    9.79    2.03
   0  -4  22    5.90    4.44
   0  -4  22    7.76    1.70
   0  -4  22    8.31    2.32
   0  -4  21   34.35    5.74
   0  -4  21   38.81    2.59
   0  -4  21   32.96    3.06
   0  -4  20   88.56    7.96
   0  -4  20   93.92    3.69
   0  -4  19   32.98    5.72
   0  -4  19   36.01    2.97
   0  -4  19   36.52    2.32
   0  -4  18    1.27    1.43
   0  -4  18   -0.07    3.72
   0  -4  18    0.34    1.06
   0  -4  17  154.78    4.99
   0  -4  17  162.69   10.07
   0  -4  17  152.47    4.05
   0  -4  16  452.07    8.15
   0  -4  16  440.86    6.52
   0  -4  15   53.54    2.38
   0  -4  15   57.28    2.97
   0  -4  14  595.06   17.92
   0  -4  14  617.48    8.77
   0  -4  14  643.28    7.29
   0  -4  13   18.40    1.45
   0  -4  13   20.18    1.81
   0  -4  13   22.48    4.87
   0  -4  12  138.06    3.28
   0  -4  12  140.20    3.87
   0  -4  11 1846.83   12.94
   0  -4  11 1812.13   11.15
   0  -4  10  577.27    6.84
   0  -4  10  568.93    6.10
   0  -4   9 1838.16   10.72
   0   4  -9 1829.20   33.72
   0  -4   8  444.61    5.31
   0  -4   8  459.56    5.48
   0  -4   7  529.04    5.58
   0  -4   7  549.02    5.24
   0  -4   6  531.49    4.65
   0  -4   6  536.58    5.49
   0  -4   5   58.76    1.42
   0  -4   5   63.08    2.03
   0   4  -5   65.25    1.57
   0  -4   4  683.45    3.59
   0  -4   4  673.07    5.69
   0   4  -3  563.16    4.84
   0  -4   3  552.24    4.73
   0   4  -3  572.33    6.34
   0  -4   2    6.47    0.70
   0  -4   2    5.28    0.38
   0   4  -2    5.11    0.38
   0  -4   1  296.27    2.38
   0   4  -1  284.31    2.67
   0   4  -1  285.56    2.50
   0  -4   1  291.23    2.72
   0  -4   0   41.23    0.87
   0  -4   0   45.02    1.16
   0   4   0   42.14    1.07
   0   4   0   44.21    1.49
   0   4   0   46.32    1.05
   0  -4   0   46.76    1.31
   0  -4   0   45.82    1.36
   0  -4   0   44.85    1.31
   0  -4  -1   29.09    1.31
   0   4   1   29.75    0.77
   0  -4  -1   35.43    1.69
   0  -4  -1   30.43    0.81
   0   4   1   31.09    1.17
   0  -4  -1   34.78    1.34
   0  -4  -2    3.21    1.21
   0   4   2    4.27    0.46
   0  -4  -2    4.01    0.85
   0   4   2    4.21    0.70
   0  -4  -2    3.45    0.79
   0  -4  -3  736.63    6.19
   0   4   3  745.19    6.16
   0  -4  -4  768.18    6.78
   0   4   4  827.18    7.14
   0  -4  -4  743.85    9.61
   0   4   4  798.61    7.10
   0   4   4  777.50    6.87
   0  -4  -4  719.05   12.44
   0  -4  -5   20.70    1.86
   0   4   5   25.84    1.50
   0   4   5   22.53    1.42
   0  -4  -5   17.54    3.76
   0  -4  -5   19.81    1.39
   0   4   6 1296.16   10.21
   0   4   6 1288.38    9.82
   0  -4  -6 1268.25    9.85
   0   4   7 1262.44   10.72
   0   4   7 1236.88   10.10
   0  -4  -7 1231.82   10.25
   0  -4  -8  294.78    5.28
   0   4   8  287.53    5.13
   0   4   8  290.04    5.55
   0   4   9  365.58    6.63
   0  -4  -9  356.46    6.08
   0   4  10    6.67    1.21
   0   4  10    8.50    1.45
   0  -4 -10    7.45    1.42
   0   4  11  167.76    4.53
   0   4  11  154.75    4.78
   0  -4 -11  169.83    4.68
   0   4  12    0.08    1.15
   0   4  12   -0.26    1.30
   0  -4 -12    0.57    1.29
   0  -4 -13  255.93    9.23
   0   4  13  266.80    6.58
   0  -4 -13  249.35    6.03
   0   4  13  250.13    6.02
   0  -4 -14    7.50    1.80
   0  -4 -14    4.47    2.86
   0   4  14    6.54    1.69
   0   4  14    6.73    1.76
   0  -4 -15   25.37    2.44
   0   4  15   25.95    2.63
   0  -4 -15   32.86    4.30
   0   4  15   34.19    2.72
   0   4  16    6.14    1.71
   0  -4 -16    1.56    1.52
   0   4  16    4.50    1.82
   0  -4 -16    7.55    3.17
   0  -4 -17   31.75    2.87
   0   4  17   29.75    2.86
   0   4  17   33.59    3.14
   0  -4 -17   38.98    4.92
   0  -4 -18   28.59    4.77
   0   4  18   30.44    3.06
   0   4  18   39.73    3.31
   0   4  19    9.60    2.36
   0   4  19   11.97    2.35
   0   4  20   47.03    3.95
   0  -4 -20   38.53    5.45
   0   4  20   33.89    3.54
   0  -4 -21   12.20    4.28
   0   4  21   17.79    3.03
   0  -4 -22   21.84    5.27
   0   4  22   29.06    3.58
   0  -5  27    1.03    1.71
   0   5 -26    4.62    4.35
   0  -5  26    0.85    1.59
   0  -5  25   -2.10    1.67
   0  -5  24   35.14    2.84
   0  -5  24   38.45    3.41
   0  -5  23    5.91    1.99
   0  -5  23    5.01    1.39
   0  -5  22   19.98    5.38
   0  -5  22   19.04    2.53
   0  -5  22   21.27    2.15
   0  -5  21    2.11    1.70
   0  -5  21    1.61    4.34
   0  -5  21    0.15    1.11
   0  -5  20    0.58    4.19
   0  -5  20    3.69    1.29
   0  -5  20    1.36    1.56
   0  -5  19   28.06    2.67
   0  -5  19   35.72    2.26
   0  -5  19   40.28    6.41
   0  -5  18    1.41    1.35
   0  -5  18    2.57    4.46
   0  -5  18    0.76    0.98
   0  -5  17   28.68    2.46
   0  -5  17   30.70    6.14
   0  -5  17   31.17    2.04
   0  -5  16    2.55    4.75
   0  -5  16    0.31    0.94
   0  -5  15    0.43    0.85
   0  -5  15    1.16    1.16
   0  -5  14   -0.11    1.04
   0  -5  14    3.33    4.14
   0  -5  14    1.20    0.88
   0  -5  13    2.09    4.01
   0  -5  13    0.72    1.01
   0  -5  13    1.23    0.88
   0  -5  12    2.76    0.95
   0  -5  12   -0.18    0.79
   0   5 -11    1.71    4.82
   0  -5  11    0.38    0.86
   0  -5  11   -0.17    0.76
   0  -5  10    4.65    1.00
   0  -5  10    4.75    0.96
   0   5 -10    7.25    5.56
   0   5  -9   -0.17    4.63
   0  -5   9    0.51    0.66
   0  -5   9    1.99    0.87
   0  -5   8   12.90    1.03
   0  -5   8   11.71    1.17
   0  -5   7   37.04    1.74
   0  -5   7   35.91    1.36
   0  -5   6    5.13    0.62
   0  -5   6    5.10    1.01
   0   5  -6    7.42    0.74
   0   5  -5   12.11    0.71
   0  -5   5   11.94    0.65
   0  -5   5   13.22    1.15
   0   5  -4    1.33    0.35
   0   5  -4    2.19    0.33
   0  -5   4    1.99    0.27
   0  -5   4    1.97    0.74
   0  -5   3   30.86    1.35
   0  -5   3   31.06    0.78
   0   5  -3   30.12    0.81
   0   5  -2   52.52    1.09
   0  -5   2   54.23    1.06
   0   5  -1    3.35    0.52
   0  -5   1    3.43    0.39
   0   5  -1    3.29    0.55
   0   5  -1    3.94    0.65
   0   5  -1    3.86    0.34
   0  -5   1    3.74    0.60
   0  -5   1    3.10    0.47
   0  -5   1    3.08    0.56
   0  -5   0   61.25    1.52
   0   5   0   55.11    1.22
   0  -5   0   60.14    1.63
   0  -5   0   59.66    1.16
   0   5   0   54.93    1.86
   0  -5   0   57.44    1.37
   0  -5   0   58.95    1.60
   0  -5  -1    6.64    1.05
   0   5   1    6.79    0.52
   0  -5  -1    6.29    0.82
   0   5   1    6.00    0.64
   0  -5  -1    6.91    0.54
   0   5   2    2.38    0.63
   0  -5  -2    2.28    1.16
   0  -5  -2    2.91    0.71
   0   5   2    1.78    0.39
   0  -5  -2    2.28    0.76
   0  -5  -3    2.38    1.23
   0   5   3    1.43    0.45
   0   5   3    0.82    0.62
   0  -5  -3    1.90    1.48
   0  -5  -3    1.36    0.73
   0   5   4   15.82    1.21
   0  -5  -4   14.79    1.85
   0  -5  -4   13.82    1.23
   0  -5  -4   12.66    2.50
   0   5   4   16.74    1.03
   0   5   5   45.50    2.04
   0   5   5   47.26    2.01
   0  -5  -5   44.28    2.74
   0  -5  -5   51.60    2.13
   0   5   6   31.13    1.83
   0   5   6   35.39    1.96
   0  -5  -6   33.16    1.85
   0  -5  -6   34.46    2.78
   0   5   7   26.32    1.80
   0   5   7   25.69    1.82
   0  -5  -7   30.14    1.88
   0  -5  -8   44.69    3.81
   0   5   8   52.48    2.64
   0  -5  -8   53.47    2.51
   0   5   8   52.48    2.51
   0  -5  -9   10.89    1.51
   0   5   9   11.99    1.49
   0   5   9    8.54    1.49
   0  -5  -9    8.81    2.55
   0  -5 -10   20.35    3.13
   0   5  10   14.92    1.87
   0  -5 -10   20.21    1.92
   0   5  10   18.65    1.85
   0   5  11   23.29    2.23
   0  -5 -11   23.48    2.11
   0   5  12    0.66    1.34
   0  -5 -12    0.55    1.27
   0  -5 -12   -0.06    2.31
   0   5  12    0.15    1.35
   0  -5 -13    5.23    2.86
   0   5  13    9.38    1.85
   0  -5 -13    9.50    1.81
   0   5  13    5.79    1.63
   0  -5 -14    0.78    1.48
   0   5  14   -2.09    1.38
   0   5  14    4.13    1.71
   0  -5 -14    2.90    2.43
   0   5  15    2.11    1.63
   0   5  15   -0.14    1.48
   0  -5 -15   -3.36    2.99
   0  -5 -15    1.26    1.57
   0  -5 -16    2.52    2.95
   0   5  16    7.27    1.97
   0   5  16    1.96    1.51
   0  -5 -16    2.69    1.82
   0  -5 -17    1.86    3.38
   0  -5 -17    2.83    1.79
   0   5  17   -2.02    1.73
   0   5  17    2.34    1.85
   0   5  18    1.89    1.83
   0  -5 -18    2.20    2.81
   0   5  18    4.39    2.10
   0  -5 -19    2.14    3.29
   0   5  19    1.90    1.97
   0   5  19   -2.52    1.97
   0   5  20   -1.48    1.87
   0  -5 -20    4.82    3.49
   0  -5 -21   -0.02    3.61
   0   5  21    5.76    2.23
   0  -6  27   33.55    3.01
   0   6 -27   27.74    7.36
   0  -6  26    1.15    1.44
   0   6 -26    5.01    5.36
   0  -6  25   23.49    2.41
   0  -6  24   20.99    2.29
   0  -6  24   26.18    6.15
   0  -6  24   24.81    2.91
   0  -6  23   43.56    6.91
   0  -6  23   44.09    3.39
   0  -6  23   41.67    2.76
   0  -6  22    2.21    1.67
   0  -6  22   -0.80    1.13
   0  -6  22   -0.89    4.57
   0  -6  21  127.17    4.20
   0  -6  21  124.79   10.02
   0  -6  21  123.88    5.01
   0  -6  20   -1.83    4.79
   0  -6  20    1.11    1.38
   0  -6  20    0.86    0.99
   0  -6  19   72.84    3.02
   0  -6  19   76.44    3.79
   0  -6  19   69.92    8.11
   0  -6  18   17.63    5.72
   0  -6  18   25.25    1.93
   0  -6  18   23.68    2.24
   0  -6  17  121.41    4.31
   0  -6  17  118.21    3.55
   0  -6  17  121.18    9.91
   0  -6  16  126.69   10.11
   0  -6  16  121.80    3.53
   0  -6  16  120.09    4.12
   0  -6  15  414.30   17.01
   0  -6  15  410.19    7.13
   0  -6  15  426.61    6.26
   0  -6  14  188.93    4.16
   0  -6  14  175.95   11.46
   0  -6  14  188.39    4.72
   0  -6  13   23.21    1.67
   0  -6  13   24.51    1.90
   0   6 -12  367.51   18.14
   0  -6  12  380.07    5.76
   0  -6  12  399.82    6.01
   0   6 -11   75.56   10.25
   0  -6  11   87.84    3.07
   0  -6  10 1670.18   11.62
   0  -6  10 1734.15   10.91
   0  -6   9  319.07    4.36
   0  -6   9  304.49    4.97
   0  -6   8  388.90    5.69
   0  -6   8  400.35    4.49
   0  -6   7 1503.33   10.66
   0  -6   7 1507.27    7.62
   0  -6   6  302.73    3.13
   0   6  -6  316.57    3.38
   0  -6   5 2087.42    5.91
   0   6  -5 2081.83    7.36
   0   6  -5 2099.09    6.64
   0   6  -4    6.00    0.57
   0  -6   4    7.75    0.58
   0   6  -4    8.15    1.83
   0  -6   3 3551.33    8.49
   0   6  -3 3542.56    9.00
   0  -6   3 3526.21   13.66
   0  -6   2 1318.01    5.65
   0  -6   2 1350.11    6.89
   0   6  -2 1300.99    6.80
   0   6  -2 1352.55    6.14
   0  -6   1 2301.39    9.84
   0  -6   1 2293.67    8.88
   0  -6   1 2376.20    7.66
   0   6  -1 2359.37    6.50
   0   6  -1 2356.17   10.27
   0  -6   1 2263.26    8.62
   0  -6   0  706.22    5.88
   0   6   0  718.23    4.59
   0  -6   0  719.51    5.76
   0  -6  -1  118.58    2.61
   0   6   1  115.19    2.21
   0  -6  -1  121.06    1.79
   0   6   1  120.96    1.90
   0  -6  -2 1373.75    9.19
   0   6   2 1381.54    8.28
   0   6   3  115.74    2.68
   0   6   3  123.38    1.91
   0  -6  -3  111.60    2.83
   0  -6  -3  118.51    3.71
   0  -6  -3  116.09    3.63
   0   6   4  453.72    4.20
   0  -6  -4  448.65    7.71
   0  -6  -4  436.96    5.77
   0  -6  -5   14.92    1.39
   0  -6  -5   16.88    3.51
   0  -6  -5   16.29    2.10
   0   6   5   17.20    1.46
   0   6   6  299.37    5.24
   0  -6  -6  304.79    5.41
   0  -6  -6  312.22    7.43
   0   6   7    2.33    1.06
   0  -6  -7    1.08    1.02
   0  -6  -7    3.22    1.96
   0   6   7    1.44    1.03
   0   6   8  199.07    4.89
   0   6   8  190.87    4.83
   0  -6  -8  189.04    4.71
   0  -6  -8  191.10    6.79
   0   6   9    6.84    1.52
   0  -6  -9    4.48    1.35
   0  -6  -9    6.58    2.35
   0   6   9    5.04    1.41
   0   6  10  346.37    6.87
   0   6  10  349.41    7.09
   0  -6 -10  331.98    6.56
   0  -6 -10  344.35    9.76
   0   6  11  302.03    6.67
   0   6  11  289.11    6.83
   0  -6 -11  300.93    9.62
   0  -6 -11  301.72    6.54
   0  -6 -12    8.28    2.88
   0  -6 -12    4.25    1.70
   0   6  12    3.97    1.76
   0   6  12    5.63    1.73
   0  -6 -13  113.05    4.65
   0  -6 -13  114.59    6.89
   0   6  13  121.24    4.73
   0   6  13  122.83    5.03
   0  -6 -14    4.09    2.71
   0  -6 -14    1.84    1.57
   0   6  14    0.93    1.55
   0   6  14    3.34    1.65
   0   6  15   52.62    3.52
   0   6  15   58.69    3.85
   0  -6 -15   55.83    3.54
   0   6  16   12.63    2.20
   0  -6 -16   14.12    3.70
   0   6  16    8.09    2.11
   0  -6 -16   11.03    2.21
   0  -6 -17   59.07    3.87
   0   6  17   69.26    4.17
   0   6  17   69.33    4.43
   0  -6 -17   67.89    6.05
   0  -6 -18   70.76    6.51
   0   6  18   68.03    4.20
   0   6  19    0.77    1.94
   0  -6 -19    0.42    3.38
   0  -6 -20   25.61    4.68
   0  -6 -21    5.62    3.88
   0  -6 -21    3.18    5.43
   0  -7  27    4.16    1.92
   0   7 -27    7.07    5.78
   0   7 -27    9.84    4.92
   0   7 -26   -2.41    5.07
   0  -7  26    2.28    1.61
   0  -7  25   18.42    5.80
   0  -7  25    3.52    1.60
   0  -7  24    0.61    4.72
   0  -7  24    0.63    1.37
   0  -7  23    0.66    1.28
   0  -7  23    3.81    5.73
   0  -7  23    3.73    1.73
   0  -7  22   44.15    2.67
   0  -7  22   35.81    7.17
   0  -7  22   40.84    3.19
   0  -7  21   10.60    1.59
   0  -7  21   11.33    2.09
   0  -7  21   13.55    5.86
   0  -7  20    5.14    5.14
   0  -7  20    2.98    1.54
   0  -7  20    0.97    1.10
   0  -7  19    3.99    1.20
   0  -7  19    2.26    1.50
   0  -7  18    5.30    1.58
   0  -7  18    5.67    5.46
   0  -7  18    7.40    1.19
   0  -7  17   17.30    6.10
   0  -7  17   22.95    1.79
   0  -7  17   22.77    2.13
   0  -7  16    3.24    1.09
   0  -7  16    1.96    1.18
   0  -7  15   43.87    7.16
   0  -7  15   46.63    2.51
   0  -7  15   47.46    2.28
   0  -7  14   45.68    2.23
   0  -7  14   48.86    2.43
   0   7 -14   55.46    8.96
   0   7 -13   -0.30    4.99
   0  -7  13    2.64    0.95
   0  -7  13    0.21    0.88
   0  -7  12   40.26    2.12
   0  -7  12   41.74    1.98
   0   7 -12   40.42    7.70
   0  -7  11   10.34    1.29
   0  -7  11   10.30    1.11
   0  -7  10   20.85    1.34
   0  -7  10   21.83    1.68
   0  -7   9    0.12    0.91
   0  -7   9    0.35    0.65
   0  -7   8    1.72    0.56
   0  -7   8    2.41    0.96
   0   7  -7   15.21    0.91
   0  -7   7   13.34    0.78
   0  -7   7   12.53    1.37
   0  -7   6   18.53    1.47
   0  -7   6   20.69    0.71
   0   7  -6   19.71    0.81
   0   7  -5   78.21    3.28
   0   7  -5   72.73    1.46
   0  -7   4    0.73    0.76
   0  -7   4    0.47    0.34
   0   7  -4    0.14    0.39
   0   7  -3   41.77    1.13
   0  -7   3   43.06    1.08
   0  -7   3   40.09    1.71
   0   7  -2   11.21    0.85
   0  -7   2   10.74    0.53
   0   7  -2   12.16    0.86
   0  -7   2   10.84    0.85
   0  -7   2   12.29    0.84
   0  -7   2   10.61    0.69
   0  -7   2   11.45    1.02
   0   7  -1    3.41    0.42
   0  -7   1    3.13    0.52
   0  -7   1    2.85    0.67
   0  -7   1    3.62    0.58
   0  -7   1    3.35    0.64
   0  -7   0    1.44    0.70
   0   7   0    0.69    0.45
   0  -7   0    0.13    0.58
   0  -7   0    0.80    0.42
   0  -7  -1    1.36    0.72
   0  -7  -1    3.51    0.95
   0  -7  -1    3.01    0.49
   0   7   1    2.07    0.53
   0   7   1    2.35    0.56
   0   7   2    3.47    0.52
   0   7   2    3.87    0.71
   0  -7  -2    2.42    0.98
   0  -7  -2    2.64    0.83
   0  -7  -2    5.04    0.74
   0  -7  -3   29.36    2.02
   0  -7  -3   30.51    1.71
   0   7   3   29.02    1.04
   0   7   3   28.17    1.50
   0  -7  -3   32.21    2.29
   0   7   4    8.66    0.71
   0  -7  -4    6.05    1.45
   0  -7  -4    6.94    1.86
   0  -7  -4    4.95    1.10
   0   7   4    5.92    0.98
   0  -7  -5   11.52    1.94
   0  -7  -5    8.88    2.92
   0  -7  -5   11.25    1.38
   0   7   5   11.82    1.26
   0   7   6    0.72    0.86
   0  -7  -6    1.18    1.07
   0  -7  -7    4.20    1.79
   0   7   7    4.60    1.15
   0  -7  -7    7.27    1.38
   0   7   8   61.34    2.83
   0  -7  -8   62.14    2.97
   0  -7  -8   61.16    4.08
   0  -7  -9    0.70    1.21
   0  -7  -9    2.24    1.92
   0   7   9    0.98    1.09
   0  -7 -10    2.24    2.26
   0  -7 -10   -0.11    1.37
   0   7  10   -0.01    1.17
   0   7  11    4.19    1.42
   0  -7 -11    3.94    2.39
   0  -7 -11    7.21    1.64
   0  -7 -12   37.95    2.74
   0   7  12   37.54    2.82
   0  -7 -12   33.04    3.66
   0  -7 -13   -0.90    1.70
   0  -7 -13    0.79    2.58
   0   7  13    5.25    1.67
   0   7  14   -1.17    1.50
   0  -7 -14   -0.54    2.50
   0  -7 -14    2.14    1.78
   0  -7 -15    2.31    2.86
   0   7  15    3.54    1.72
   0  -7 -15    6.37    2.06
   0  -7 -16    4.76    2.13
   0   7  16    1.28    1.88
   0  -7 -16   -0.44    3.13
   0   7  17    5.15    1.97
   0  -7 -17    5.62    2.02
   0  -7 -17    1.59    2.99
   0  -7 -18    1.89    1.94
   0  -7 -18    3.15    3.09
   0   7  18    3.32    2.04
   0  -7 -19    7.79    3.95
   0  -7 -20   -3.59    5.27
   0  -7 -20    7.05    3.92
   0  -8  28   25.04    2.79
   0  -8  27    7.12    1.89
   0   8 -27    4.91    5.21
   0   8 -26   12.30    5.46
   0  -8  26   15.70    2.17
   0  -8  25    4.06    1.54
   0  -8  25    3.68    5.40
   0  -8  24   15.61    1.98
   0  -8  24   11.84    6.29
   0  -8  23   61.61    4.01
   0  -8  23   73.43    9.02
   0  -8  23   70.32    3.37
   0  -8  22   16.36    6.77
   0  -8  22   16.35    2.33
   0  -8  22   17.63    1.91
   0  -8  21  184.44    5.04
   0  -8  21  170.77    5.80
   0  -8  21  174.74   13.00
   0  -8  20    3.44    1.24
   0  -8  20   -0.36    1.29
   0  -8  19   -0.56    1.36
   0  -8  19    3.64    1.14
   0  -8  18   33.36    2.20
   0  -8  18   27.51    2.32
   0  -8  17  221.57    5.49
   0  -8  17  228.06   14.34
   0  -8  17  231.42    5.07
   0  -8  16  130.63    4.09
   0  -8  16  120.56   11.16
   0  -8  16  130.53    3.87
   0  -8  15  203.79    4.70
   0   8 -15  243.45   17.16
   0  -8  15  229.37    5.02
   0  -8  14  343.48    6.17
   0  -8  14  360.32    5.99
   0  -8  13   57.46    2.58
   0  -8  13   59.67    2.92
   0  -8  12  355.16    6.02
   0  -8  12  365.59    5.32
   0  -8  11  547.86    6.17
   0  -8  11  517.55    7.48
   0  -8  10 1779.46   13.29
   0  -8  10 1735.25   10.05
   0  -8   9    3.25    0.62
   0  -8   9    5.18    1.19
   0  -8   8 1297.41    6.83
   0  -8   8 1257.96   10.91
   0   8  -7 2220.63    8.61
   0  -8   7 2194.11   14.25
   0  -8   7 2194.70    7.24
   0   8  -6  126.73    2.28
   0  -8   6  123.97    3.32
   0   8  -6  123.31    1.62
   0   8  -5  886.35    5.21
   0  -8   5  882.47    8.27
   0   8  -5  876.43   11.02
   0  -8   5  886.90    4.85
   0  -8   4   19.90    0.82
   0   8  -4   21.05    0.91
   0  -8   4   18.07    1.37
   0  -8   3  814.70    4.97
   0   8  -3  815.37    5.39
   0  -8   3  809.05    6.09
   0   8  -2  150.57    2.62
   0  -8   2  153.52    2.03
   0  -8   2  146.86    2.38
   0  -8   2  145.46    2.84
   0  -8   2  153.44    2.90
   0  -8   2  148.55    2.74
   0  -8   1  907.33    5.85
   0   8  -1  903.29    4.79
   0  -8   1  911.31    6.47
   0  -8   1  900.52    7.22
   0  -8   0  312.80    3.17
   0   8   0  311.31    3.38
   0  -8   0  313.04    4.55
   0  -8  -1  410.77    5.43
   0   8   1  405.07    4.41
   0  -8  -1  410.06    3.75
   0  -8  -1  417.53    5.72
   0  -8  -2 1092.43    9.27
   0  -8  -2 1066.43    7.58
   0   8   2 1079.12    7.89
   0  -8  -3  533.71    6.77
   0  -8  -3  544.91    7.60
   0   8   3  529.56    6.02
   0  -8  -4  839.70    8.83
   0   8   4  845.30    8.15
   0  -8  -5   53.94    3.34
   0   8   5   48.40    2.25
   0  -8  -5   43.67    4.22
   0  -8  -5   49.91    2.49
   0  -8  -6  362.03    8.36
   0   8   6  339.21    5.85
   0  -8  -7   68.16    4.08
   0   8   7   68.65    2.87
   0  -8  -7   69.25    3.18
   0   8   8  250.96    5.60
   0  -8  -8  249.00    5.84
   0  -8  -8  253.84    7.98
   0  -8  -9  223.97    5.69
   0   8   9  222.28    5.47
   0  -8  -9  238.54    7.93
   0  -8 -10   46.08    3.07
   0  -8 -10   44.40    4.09
   0   8  10   44.12    2.90
   0  -8 -11  191.60    5.83
   0  -8 -11  202.52    8.37
   0  -8 -12   13.18    2.12
   0   8  12    9.75    1.78
   0  -8 -13   63.18    3.78
   0  -8 -13   67.18    5.42
   0   8  13   66.76    3.74
   0   8  14   15.83    2.41
   0  -8 -14   13.28    2.41
   0  -8 -14   19.63    3.99
   0   8  15   74.93    4.10
   0  -8 -15   75.81    6.03
   0  -8 -15   70.25    4.20
   0  -8 -16   34.83    4.86
   0   8  16   41.45    3.37
   0  -8 -16   41.11    3.41
   0  -8 -17   42.25    5.26
   0  -8 -17   33.29    3.33
   0   8  17   43.22    3.49
   0  -8 -18    2.36    2.19
   0  -8 -18   -2.40    3.65
   0  -8 -19    4.95    3.67
   0  -8 -19    8.54    5.57
   0  -9  28    2.45    1.69
   0   9 -28    9.06    5.98
   0   9 -27   -1.95    5.61
   0  -9  27    3.54    1.68
   0   9 -26   13.41    5.85
   0  -9  26   14.32    6.38
   0  -9  26   11.87    1.85
   0  -9  25    1.37    1.34
   0  -9  25    1.96    6.58
   0  -9  24   27.30    2.32
   0  -9  24   26.16    7.44
   0  -9  23   17.23    1.93
   0  -9  23   14.98    6.25
   0  -9  23   19.40    2.45
   0  -9  22   -0.60    1.24
   0  -9  22   -0.20    1.45
   0  -9  22    2.49    6.14
   0  -9  21    6.58    1.44
   0  -9  21    4.94    1.61
   0  -9  20   -0.48    1.32
   0  -9  20    2.82    5.71
   0  -9  20   -0.27    1.07
   0  -9  19    2.92    1.20
   0  -9  19    5.35    1.37
   0  -9  18    4.94    1.39
   0  -9  18    7.31    5.85
   0  -9  18    7.42    1.35
   0  -9  17   71.26    3.15
   0  -9  17   68.20    2.98
   0  -9  17   69.46    9.39
   0  -9  16    1.69    1.10
   0   9 -16    2.69    6.65
   0  -9  16    2.63    1.10
   0  -9  15   23.19    1.78
   0   9 -15   21.62    7.82
   0  -9  15   20.19    1.75
   0  -9  14   16.57    1.50
   0   9 -14   22.00    7.09
   0  -9  14   15.90    1.63
   0  -9  13    2.04    0.87
   0  -9  13    4.99    1.28
   0  -9  12   20.14    1.35
   0  -9  12   25.25    1.85
   0  -9  11   25.00    1.35
   0  -9  11   25.39    1.88
   0  -9  10   23.64    1.22
   0  -9  10   29.69    2.01
   0  -9   9   42.93    1.35
   0  -9   9   47.51    2.37
   0   9  -8   11.32    0.82
   0  -9   8   10.81    1.38
   0   9  -7   21.18    0.82
   0  -9   7   21.80    1.73
   0   9  -7   23.03    1.20
   0   9  -6    3.86    1.57
   0  -9   6    3.82    1.06
   0  -9   5   28.38    0.97
   0  -9   5   28.96    1.77
   0  -9   4    0.85    0.85
   0  -9   4    0.32    0.38
   0   9  -3   41.27    1.57
   0  -9   3   41.30    1.31
   0  -9   3   41.03    1.86
   0  -9   3   43.16    1.60
   0  -9   2    0.61    0.72
   0  -9   2    0.32    0.42
   0  -9   2    0.61    0.73
   0  -9   2    0.33    0.59
   0  -9   2    0.73    0.56
   0  -9   1    0.98    0.59
   0  -9   1    2.37    0.84
   0  -9   1    1.73    0.49
   0   9  -1    1.12    0.39
   0  -9   0    2.64    0.51
   0  -9   0    2.92    0.85
   0  -9   0    2.90    0.87
   0   9   0    3.03    0.55
   0  -9  -1   20.82    0.98
   0  -9  -1   18.99    1.45
   0   9   1   18.65    1.10
   0   9   2   21.25    1.27
   0  -9  -2   22.40    1.81
   0  -9  -2   20.81    1.60
   0  -9  -2   22.38    1.29
   0   9   3   12.61    1.18
   0  -9  -3   16.61    1.77
   0  -9  -3   12.33    1.65
   0  -9  -3   14.63    1.46
   0   9   4   10.85    1.22
   0  -9  -4   10.87    1.42
   0  -9  -4   15.59    1.98
   0  -9  -4   13.75    2.17
   0  -9  -5    0.53    1.11
   0  -9  -5    0.07    1.42
   0  -9  -5   -0.84    2.48
   0   9   5   -0.61    0.89
   0  -9  -6    8.15    1.50
   0   9   6    9.26    1.32
   0  -9  -7    5.14    2.20
   0   9   7    2.85    1.14
   0  -9  -7    2.79    1.44
   0  -9  -8    0.05    1.35
   0   9   8    0.38    1.11
   0  -9  -8    1.56    1.96
   0  -9  -9    1.30    2.14
   0  -9  -9    3.81    1.72
   0   9   9    0.07    1.31
   0  -9 -10   -0.04    1.50
   0   9  10    0.51    1.29
   0  -9 -10   -0.29    2.28
   0   9  11   -0.05    1.31
   0  -9 -11    2.36    1.69
   0  -9 -11    4.30    2.63
   0   9  12    2.63    1.51
   0  -9 -12    8.67    3.08
   0  -9 -12    9.26    2.01
   0  -9 -13    3.57    1.88
   0   9  13    3.37    1.64
   0  -9 -13    4.87    2.93
   0  -9 -14   24.00    2.68
   0  -9 -14   21.47    4.16
   0   9  14   23.18    2.62
   0  -9 -15    1.76    1.88
   0  -9 -15    2.26    3.10
   0   9  15    1.32    1.66
   0  -9 -16   -0.33    2.08
   0  -9 -16   -0.45    3.34
   0   9  16    1.63    1.78
   0  -9 -17    1.77    2.18
   0  -9 -17   -1.83    3.29
   0  -9 -18    5.38    2.32
   0  -9 -18   12.83    3.87
   0  -9 -19    2.26    5.30
   0  -9 -19    2.22    3.52
   0 -10  28   17.98    2.33
   0  10 -28   25.45    6.69
   0 -10  27    0.78    1.42
   0 -10  27   -1.43    5.60
   0  10 -27   -2.14    5.13
   0 -10  26   15.44    7.21
   0  10 -26   18.33    5.74
   0 -10  26   25.56    2.30
   0  10 -25    1.20    4.60
   0 -10  25    1.74    1.31
   0 -10  25   -0.26    6.52
   0 -10  24   45.44    2.92
   0 -10  24   46.58    8.81
   0 -10  23  105.28    4.06
   0 -10  23   98.04   11.49
   0 -10  22   -3.16    5.87
   0 -10  22   -0.28    1.18
   0 -10  22    0.42    1.42
   0 -10  21   51.55    9.29
   0 -10  21   57.06    3.32
   0 -10  21   64.77    3.11
   0 -10  20    9.43    1.50
   0 -10  20   12.15    1.80
   0 -10  20   17.38    7.43
   0 -10  19   44.41    2.69
   0 -10  19   44.31    2.60
   0 -10  18    2.15    1.18
   0 -10  18    5.37    6.54
   0 -10  18    1.73    1.11
   0 -10  17  204.96    4.94
   0 -10  17  198.61    5.02
   0  10 -17  215.39   17.60
   0 -10  16  357.80    6.86
   0 -10  16  346.15    6.14
   0  10 -15  224.53   17.26
   0 -10  15  235.71    5.39
   0 -10  15  255.44    4.93
   0 -10  14  592.49    7.11
   0 -10  14  596.58    8.51
   0 -10  13   64.74    3.11
   0 -10  13   68.13    2.39
   0 -10  12  697.11    6.67
   0 -10  12  673.93    8.94
   0 -10  11  179.51    3.24
   0 -10  11  205.03    5.20
   0 -10  10 1746.47    8.53
   0 -10  10 1567.16   13.51
   0 -10   9   79.07    3.14
   0  10  -8   83.93    2.33
   0  10  -8   78.68    1.64
   0 -10   8   78.71    3.12
   0 -10   7  370.47    6.25
   0  10  -7  399.60    8.61
   0 -10   6  569.09    7.52
   0  10  -6  584.19   10.18
   0 -10   5  424.76    3.75
   0 -10   5  413.36    6.30
   0 -10   4 1905.49   10.21
   0  10  -4 1926.79   10.37
   0 -10   3  239.40    2.83
   0 -10   3  264.35    3.36
   0 -10   3  248.18    4.03
   0 -10   3  246.96    4.19
   0 -10   3  225.57    2.26
   0 -10   2   70.56    2.06
   0 -10   2   71.71    1.78
   0 -10   2   75.35    2.42
   0 -10   2   75.12    1.99
   0 -10   2   75.18    2.42
   0 -10   1   82.35    2.27
   0 -10   1   78.76    1.94
   0 -10   1   79.42    2.55
   0 -10   0  246.10    4.53
   0 -10   0  245.12    4.22
   0 -10   0  237.35    3.09
   0  10   0  238.01    3.22
   0 -10  -1  944.53    9.02
   0 -10  -1  927.13    9.11
   0 -10  -1  926.65    6.40
   0 -10  -2  177.24    4.25
   0 -10  -2  182.76    3.50
   0 -10  -2  184.94    4.46
   0  10   2  179.58    3.44
   0 -10  -3  136.73    3.97
   0 -10  -3  153.85    4.45
   0 -10  -3  146.94    4.47
   0  10   3  143.92    3.40
   0 -10  -4  139.63    4.11
   0  10   4  148.26    3.64
   0 -10  -4  133.49    4.85
   0 -10  -5   15.78    1.95
   0  10   5   17.09    1.58
   0 -10  -5   16.61    2.18
   0  10   6  694.70    8.57
   0 -10  -6  715.59    9.71
   0 -10  -6  712.12   11.49
   0 -10  -7   50.18    3.60
   0 -10  -7   45.69    2.77
   0  10   7   42.46    2.49
   0 -10  -8  225.92    5.94
   0 -10  -8  223.15    7.53
   0  10   8  226.74    5.44
   0 -10  -9   98.40    4.17
   0  10   9   94.64    3.76
   0 -10  -9  100.21    5.46
   0 -10 -10   55.99    3.35
   0 -10 -10   54.70    4.32
   0  10  10   56.84    3.11
   0 -10 -11   89.32    5.56
   0 -10 -11   87.82    4.28
   0  10  11   84.29    3.94
   0 -10 -12   16.96    2.46
   0  10  12   24.49    2.51
   0 -10 -12   23.20    3.59
   0 -10 -13   23.57    3.73
   0  10  13   24.92    2.70
   0 -10 -13   31.07    3.05
   0  10  14    2.15    1.78
   0 -10 -14    0.71    1.83
   0 -10 -14    2.20    2.67
   0 -10 -15   80.23    4.59
   0 -10 -15   72.38    5.91
   0 -10 -16   -0.78    3.02
   0 -10 -16    3.14    2.22
   0 -10 -17   18.53    2.99
   0 -10 -17   11.60    5.58
   0 -10 -17   20.64    4.13
   0 -10 -18    0.32    2.25
   0 -10 -18    4.53    3.58
   0 -10 -18   -0.17    4.94
   0  11 -28    5.27    5.64
   0 -11  28   -1.48    1.50
   0 -11  28    8.53    8.30
   0  11 -27    5.38    5.16
   0 -11  27    9.16    1.75
   0 -11  26   15.07    7.56
   0  11 -26    4.67    4.98
   0 -11  26   11.09    1.89
   0 -11  25    3.75    1.43
   0  11 -25    4.07    4.58
   0 -11  25    9.57    7.18
   0 -11  24   32.48    8.82
   0 -11  24   30.42    2.53
   0 -11  23    6.59    1.49
   0 -11  23   18.41    7.75
   0 -11  22    8.15    6.58
   0 -11  22   14.63    1.79
   0 -11  21   -0.02    1.20
   0 -11  21   -0.90    6.86
   0 -11  21    2.94    1.33
   0 -11  20   12.82    1.76
   0 -11  20   10.31    1.57
   0 -11  20   11.01    7.45
   0 -11  19    4.29    1.34
   0 -11  19    1.93    1.28
   0 -11  19    3.46    6.96
   0 -11  18    2.04    1.22
   0 -11  18    0.40    0.95
   0  11 -18    4.09    7.65
   0  11 -17   30.20    9.26
   0 -11  17   22.02    1.92
   0 -11  17   23.03    2.07
   0 -11  16    4.93    1.11
   0  11 -16    4.92    6.64
   0 -11  16    7.77    1.46
   0 -11  15    5.22    1.00
   0 -11  15    5.96    1.37
   0 -11  14    2.74    1.22
   0 -11  14    0.90    0.78
   0 -11  13   15.97    1.80
   0 -11  13   13.77    1.12
   0 -11  12   10.29    0.92
   0 -11  12    8.73    1.49
   0 -11  11   15.51    1.74
   0 -11  10   37.63    2.37
   0  11 -10   43.73    2.34
   0  11  -9    7.73    0.66
   0 -11   9    7.05    1.34
   0  11  -9    6.40    1.00
   0 -11   8   54.70    2.71
   0  11  -7    0.54    1.74
   0 -11   7    2.05    0.96
   0 -11   6   39.96    1.24
   0 -11   6   42.41    2.35
   0 -11   5   26.89    1.09
   0 -11   5   24.58    1.32
   0 -11   4    0.51    0.91
   0 -11   4    0.36    0.90
   0 -11   4    1.01    0.68
   0 -11   4    1.58    0.54
   0  11  -4    1.48    0.68
   0 -11   3   78.07    2.46
   0 -11   3   76.98    2.43
   0 -11   3   76.91    1.96
   0  11  -3   76.50    2.15
   0 -11   2   -1.08    0.64
   0 -11   2   -0.10    0.53
   0 -11   2   -0.01    0.79
   0 -11   2    1.39    0.65
   0 -11   2    1.65    0.93
   0 -11   1   26.56    1.45
   0 -11   1   26.97    1.67
   0 -11   1   27.45    1.22
   0  11   0    5.55    0.69
   0 -11   0    4.81    1.04
   0 -11   0    4.75    0.95
   0 -11   0    5.88    0.72
   0 -11  -1    4.18    1.13
   0  11   1    4.72    0.75
   0 -11  -1    4.63    0.74
   0 -11  -1    6.82    1.15
   0 -11  -2    2.49    0.80
   0 -11  -2    2.16    1.07
   0  11   2    3.16    0.82
   0 -11  -2    3.59    1.17
   0 -11  -3   -0.74    1.06
   0  11   3   -0.43    0.71
   0 -11  -3    1.62    1.39
   0 -11  -3   -1.90    1.25
   0 -11  -4    2.00    1.16
   0  11   4    2.00    0.88
   0 -11  -4    1.80    1.81
   0 -11  -4    2.65    1.37
   0 -11  -5   30.87    4.03
   0  11   5   27.33    1.82
   0 -11  -5   25.52    2.56
   0 -11  -5   27.63    2.22
   0 -11  -6   -0.01    1.27
   0  11   6   -2.04    1.11
   0 -11  -6    0.32    1.79
   0  11   7   13.21    1.62
   0 -11  -7   13.24    1.94
   0 -11  -7   12.45    2.31
   0  11   8    1.16    1.23
   0 -11  -8   -1.28    1.52
   0 -11  -8   -1.31    2.08
   0  11   9    3.04    1.37
   0 -11  -9    5.80    2.35
   0 -11  -9    2.30    1.57
   0 -11 -10    1.89    2.15
   0 -11 -10    1.43    1.48
   0  11  10    0.75    1.45
   0 -11 -11    7.73    2.06
   0 -11 -11    6.35    2.63
   0  11  11    6.06    1.66
   0 -11 -12    2.18    1.84
   0 -11 -12    3.26    2.50
   0  11  12    0.32    1.41
   0 -11 -13    5.90    2.84
   0 -11 -13    2.80    2.04
   0  11  13    2.52    1.63
   0 -11 -14   -0.39    2.62
   0 -11 -14    2.25    2.17
   0 -11 -15    4.29    2.12
   0 -11 -15    2.06    2.80
   0 -11 -16    0.16    2.09
   0 -11 -16   -1.63    4.88
   0 -11 -16    0.16    3.23
   0 -11 -17    0.59    2.38
   0 -11 -17    0.78    5.11
   0 -11 -17   -3.18    3.54
   0 -11 -18    3.68    5.37
   0 -12  28    2.31    1.49
   0  12 -28   -3.49    5.14
   0 -12  28   -1.23    6.81
   0 -12  27    8.79    1.76
   0  12 -27    2.88    4.86
   0  12 -26   32.91    6.41
   0 -12  26   35.31    2.73
   0 -12  26   32.56    9.31
   0 -12  25   -0.53    1.37
   0 -12  25   11.59    7.93
   0  12 -25    8.61    4.87
   0  12 -24   74.95    7.49
   0 -12  24   58.28   10.70
   0 -12  24   62.97    3.30
   0  12 -23  126.98    9.14
   0 -12  23  129.34   13.43
   0 -12  23  154.40    4.89
   0 -12  22   11.18    6.95
   0 -12  22    6.63    1.69
   0 -12  21  121.38   12.93
   0 -12  21  165.85    4.98
   0 -12  20  112.39    4.17
   0 -12  20  102.10   12.13
   0 -12  19  184.38    4.79
   0 -12  19  175.57    5.13
   0 -12  18   14.30    1.68
   0 -12  18   14.48    1.93
   0  12 -18   11.09    8.00
   0 -12  17  198.32    4.57
   0 -12  17  190.81    5.24
   0 -12  16  161.53    3.94
   0 -12  16  152.14    4.80
   0 -12  15  427.90    7.76
   0 -12  14   65.81    3.44
   0 -12  13  130.98    4.52
   0  12 -12  306.71    6.68
   0 -12  12  260.45    6.10
   0 -12  11    3.96    1.65
   0  12 -11    6.14    1.48
   0  12 -10  779.19    5.81
   0 -12  10  796.87   10.39
   0  12 -10  797.97    7.53
   0  12  -9  112.42    1.65
   0  12  -9  114.22    2.01
   0  12  -8  163.01    6.16
   0 -12   8  161.05    4.61
   0 -12   7  827.28    9.93
   0  12  -7  806.37   13.14
   0 -12   6  135.85    2.98
   0 -12   6  136.98    2.32
   0 -12   6  139.91    4.18
   0 -12   5  989.23   10.59
   0 -12   5  993.66    8.30
   0  12  -5  975.23    8.02
   0 -12   5  987.04    6.43
   0 -12   4  311.03    3.84
   0 -12   4  300.22    5.88
   0 -12   4  302.92    4.79
   0 -12   3  500.39    5.21
   0 -12   3  466.21    4.88
   0 -12   3  493.61    5.92
   0 -12   3  450.41    4.01
   0 -12   3  494.80    6.32
   0 -12   2    8.33    1.26
   0 -12   2   11.49    1.34
   0 -12   2    9.20    0.89
   0 -12   2   10.11    1.03
   0 -12   1  511.80    6.89
   0 -12   1  511.54    5.07
   0 -12   1  517.45    8.18
   0 -12   1  525.35    6.21
   0 -12   0  172.83    3.93
   0 -12   0  163.08    4.16
   0 -12   0  169.92    2.93
   0 -12  -1 1031.22    7.69
   0 -12  -1 1038.97   10.04
   0  12   1 1011.20    7.73
   0 -12  -1 1011.86   10.40
   0 -12  -2  111.63    3.70
   0 -12  -2  109.03    3.09
   0 -12  -2  115.60    3.79
   0  12   2  117.60    2.93
   0 -12  -3  137.60    4.40
   0 -12  -3  134.51    4.62
   0 -12  -3  130.73    4.12
   0  12   3  133.44    3.37
   0  12   4   17.10    1.74
   0 -12  -4   20.84    2.48
   0 -12  -4   19.46    2.46
   0  12   5    5.38    1.10
   0 -12  -5    3.19    1.48
   0 -12  -5    4.15    1.75
   0  12   6  157.50    4.30
   0 -12  -6  166.22    5.19
   0  12   7   -0.12    1.14
   0 -12  -7   -1.98    1.55
   0  12   8  221.43    5.50
   0 -12  -8  219.61    7.63
   0 -12  -8  211.63    6.16
   0 -12  -9    4.91    2.40
   0 -12  -9    3.98    1.78
   0  12   9    1.61    1.39
   0  12  10   99.55    4.23
   0 -12 -10   95.20    4.49
   0 -12 -10  101.68    5.78
   0 -12 -11   34.42    3.20
   0  12  11   42.70    2.99
   0 -12 -11   42.37    4.36
   0 -12 -12   55.84    3.95
   0 -12 -12   57.06    5.11
   0 -12 -13   83.88    4.81
   0 -12 -13   93.13    6.49
   0 -12 -14   -2.52    2.32
   0 -12 -14    1.43    2.98
   0 -12 -15   16.74    5.79
   0 -12 -15    8.61    3.62
   0 -12 -15   10.48    2.66
   0 -12 -16   -1.41    3.05
   0 -12 -16    2.79    5.08
   0 -12 -16    6.73    2.44
   0 -12 -17    2.16    3.11
   0 -12 -17    6.60    5.71
   0 -13  29    1.72    1.51
   0 -13  29    8.41    7.75
   0 -13  28    6.52    1.84
   0 -13  28    1.33    7.48
   0 -13  27   -1.10    6.99
   0  13 -27    2.39    4.93
   0 -13  27    0.26    1.39
   0  13 -26   12.54    5.09
   0 -13  26    5.09    1.65
   0 -13  26    9.07    7.83
   0  13 -25   -3.55    4.40
   0 -13  25   -0.52    1.24
   0 -13  25   -2.50    7.12
   0 -13  24    3.51    1.38
   0 -13  24   -1.15    7.47
   0  13 -24    2.45    3.96
   0  13 -23    1.89    3.95
   0 -13  23    2.38    1.31
   0  13 -22    0.50    3.45
   0 -13  22    0.85    1.36
   0 -13  22    9.94    8.72
   0 -13  21    0.56    1.29
   0  13 -21    3.98    3.41
   0 -13  20   30.56    2.50
   0 -13  20   30.57    9.00
   0 -13  19   40.94    2.87
   0  13 -19   32.92   10.62
   0 -13  18    0.37    1.23
   0  13 -18    0.61    6.56
   0  13 -17   16.27    7.61
   0 -13  17   -0.01    1.22
   0 -13  16    2.26    1.24
   0 -13  15   19.07    2.01
   0  13 -15   17.77    2.72
   0 -13  14   -0.28    1.29
   0  13 -14    3.45    1.81
   0  13 -13   22.04    2.23
   0 -13  13   17.91    1.98
   0 -13  12    8.58    1.63
   0  13 -12    7.24    1.46
   0 -13  11    4.56    1.48
   0  13 -11    5.24    0.94
   0  13 -10   68.95    1.44
   0  13 -10   73.52    1.70
   0 -13   9    5.20    1.41
   0  13  -8   60.49    4.08
   0 -13   8   56.71    2.92
   0 -13   7    1.70    1.14
   0  13  -7    1.62    1.81
   0 -13   7    1.77    0.53
   0  13  -6   30.89    1.62
   0 -13   6   33.99    2.30
   0 -13   6   32.52    1.65
   0 -13   6   33.26    1.30
   0 -13   5    2.80    0.62
   0 -13   5    3.26    0.78
   0 -13   5    3.21    1.24
   0 -13   5    2.63    1.10
   0  13  -5    1.71    0.71
   0  13  -4    4.40    0.78
   0 -13   4    4.46    0.73
   0 -13   4    4.75    1.24
   0 -13   4    4.15    0.94
   0 -13   4    5.77    1.09
   0 -13   3   12.52    1.16
   0 -13   3    9.09    0.75
   0 -13   3    9.46    1.00
   0 -13   3   12.02    1.06
   0 -13   3   11.27    1.30
   0 -13   2    1.75    0.81
   0 -13   2   -0.25    0.63
   0 -13   2    0.67    0.93
   0 -13   2    0.59    1.08
   0 -13   1   30.73    2.41
   0 -13   1   32.88    2.05
   0 -13   1   34.45    1.45
   0 -13   1   34.80    1.80
   0 -13   0   18.97    1.59
   0 -13   0   19.53    1.18
   0 -13   0   20.54    2.33
   0 -13   0   18.65    1.73
   0 -13  -1   11.03    1.39
   0 -13  -1   10.99    1.50
   0 -13  -1   14.07    1.14
   0 -13  -2    1.78    0.95
   0 -13  -2    4.79    1.26
   0 -13  -2    4.08    1.23
   0 -13  -3   -0.80    1.19
   0  13   3    0.73    0.80
   0 -13  -3    0.78    1.18
   0  13   4   43.76    2.15
   0 -13  -4   42.63    2.86
   0 -13  -4   40.06    2.70
   0  13   5   18.41    1.62
   0 -13  -5   17.49    2.16
   0 -13  -5   20.20    2.34
   0 -13  -6    3.22    1.60
   0  13   6    1.87    1.07
   0 -13  -6    1.18    1.67
   0 -13  -7    7.18    2.09
   0 -13  -7    8.51    1.88
   0  13   7    5.82    1.57
   0  13   8    0.00    1.22
   0 -13  -8    0.14    1.47
   0 -13  -8    2.03    1.97
   0 -13  -9    0.22    1.56
   0 -13  -9    1.92    2.14
   0 -13 -10    8.60    2.17
   0 -13 -10    6.73    2.53
   0 -13 -11    3.35    2.43
   0 -13 -11    2.15    2.00
   0 -13 -12   12.66    4.64
   0 -13 -12    6.01    2.25
   0 -13 -12   11.77    3.11
   0 -13 -13    8.62    2.98
   0 -13 -13    3.83    4.44
   0 -13 -13    3.77    2.16
   0 -13 -14   -0.99    2.20
   0 -13 -14    3.76    4.50
   0 -13 -14    4.06    2.96
   0 -13 -15    1.81    3.04
   0 -13 -15    1.37    4.81
   0 -13 -15   -2.64    2.31
   0 -13 -16   -1.18    3.14
   0 -13 -16    0.96    4.95
   0 -14  28    0.93    1.51
   0 -14  28    4.29    8.14
   0 -14  27    2.27    7.67
   0 -14  27    0.18    1.43
   0 -14  26    5.47    8.07
   0 -14  26    4.25    1.54
   0 -14  25   11.47    1.80
   0 -14  25   11.52    8.23
   0 -14  24   74.11   12.35
   0 -14  24   51.61    3.15
   0  14 -24   69.72    7.30
   0 -14  23   41.58   10.35
   0 -14  23   37.25    2.82
   0  14 -23   28.34    5.16
   0  14 -22   94.29    7.28
   0 -14  22   95.51   12.92
   0 -14  22   98.04    4.19
   0 -14  21   77.51    3.79
   0  14 -21   78.84    6.29
   0  14 -20   37.80    4.44
   0 -14  20   41.02    2.94
   0  14 -20   45.52   11.25
   0 -14  19  192.03    5.70
   0  14 -19  241.08    9.15
   0  14 -19  220.19   19.90
   0  14 -18   21.90   10.39
   0 -14  18   30.43    2.79
   0  14 -18   45.47    4.49
   0  14 -17  191.19    7.44
   0 -14  17  176.28    5.54
   0  14 -16   55.00    4.61
   0 -14  16   51.33    3.67
   0  14 -15  219.53    6.73
   0 -14  15  210.63    5.96
   0 -14  14  157.80    5.18
   0  14 -14  178.63    5.47
   0 -14  13   39.95    3.00
   0  14 -13   35.39    2.43
   0  14 -12  149.68    3.51
   0 -14  12  139.20    4.81
   0  14 -11   10.55    0.76
   0 -14  11   12.33    1.91
   0 -14  10  239.05    6.16
   0 -14   9   49.84    3.03
   0 -14   8  221.57    5.64
   0  14  -8  201.46    7.30
   0 -14   7  129.14    2.44
   0 -14   7  125.29    4.34
   0 -14   7  122.15    3.12
   0 -14   6  406.54    7.55
   0 -14   6  429.97    4.51
   0  14  -6  410.13    5.50
   0 -14   6  402.59    7.10
   0 -14   6  409.86    5.78
   0 -14   5  571.80    7.73
   0 -14   5  554.80    8.72
   0 -14   5  564.49    7.01
   0 -14   5  585.23    5.51
   0 -14   4   85.85    2.82
   0 -14   4   89.62    2.38
   0 -14   4   85.36    2.94
   0 -14   3   97.52    2.66
   0 -14   3  108.81    3.52
   0 -14   3  114.94    2.86
   0 -14   3   98.93    2.63
   0 -14   2   10.19    1.65
   0 -14   2    8.10    1.19
   0 -14   2   10.17    1.11
   0 -14   2    6.75    1.40
   0 -14   1   78.02    2.19
   0 -14   1   83.42    3.62
   0 -14   1   84.68    2.78
   0 -14   1   78.35    3.09
   0 -14   0  121.40    4.21
   0 -14   0  121.40    3.81
   0 -14  -1  387.85    7.09
   0 -14  -1  369.74    9.23
   0 -14  -2   22.11    2.15
   0 -14  -2   24.20    2.23
   0 -14  -2   26.98    3.42
   0 -14  -3  179.08    5.23
   0 -14  -3  154.24    4.94
   0 -14  -4   44.24    3.00
   0 -14  -4   41.11    2.81
   0 -14  -5   14.07    2.20
   0 -14  -5   13.95    2.16
   0 -14  -6  179.55    5.82
   0 -14  -6  196.49    6.53
   0 -14  -7    9.94    2.31
   0 -14  -7    3.15    1.67
   0 -14  -8   61.47    3.83
   0 -14  -8   62.78    4.31
   0 -14  -9   12.21    2.37
   0 -14  -9   16.06    2.96
   0 -14 -10   35.57    3.98
   0 -14 -10   27.08    2.81
   0 -14 -10   34.94    5.41
   0 -14 -11   33.40    3.92
   0 -14 -11   27.74    3.14
   0 -14 -12    2.34    4.32
   0 -14 -12    9.78    3.14
   0 -14 -12    6.72    2.43
   0 -14 -13    7.17    2.50
   0 -14 -13    5.41    2.93
   0 -14 -13   -0.16    4.20
   0 -14 -14    0.55    2.87
   0 -14 -14    2.61    4.62
   0 -14 -14    4.74    2.38
   0 -14 -15   15.28    3.92
   0 -14 -15   25.78    6.22
   0 -14 -16    8.92    5.58
   0 -15  28   10.14    8.54
   0 -15  28    0.52    1.42
   0 -15  27    3.26    1.48
   0 -15  27   -3.53    8.29
   0 -15  26    9.01    8.57
   0 -15  26    6.74    1.77
   0 -15  25   -1.26    1.28
   0 -15  25   -2.98    8.40
   0 -15  24    7.74    8.37
   0 -15  24    3.47    1.39
   0 -15  23    5.18    1.52
   0 -15  23   14.91    9.18
   0 -15  22    1.32    1.55
   0 -15  22    4.85    8.43
   0 -15  21   10.89    1.93
   0  15 -21    2.18    8.91
   0  15 -20    7.14    9.23
   0 -15  20    1.52    1.38
   0 -15  19   10.54    1.82
   0  15 -19    8.54    7.65
   0 -15  18   34.41    2.79
   0  15 -18   27.47    9.79
   0 -15  17   15.28    2.01
   0  15 -17   28.50    3.05
   0 -15  16    1.30    1.36
   0  15 -16    7.76    2.09
   0  15 -15   43.96    3.00
   0 -15  15   46.55    3.14
   0 -15  14   19.77    2.27
   0 -15  13   18.09    2.12
   0 -15  12    5.42    1.58
   0 -15  11   -1.43    1.30
   0 -15  10   15.62    1.91
   0 -15   9   -0.15    0.76
   0  15  -9    3.34    2.43
   0 -15   9    3.53    1.44
   0 -15   8    2.48    1.27
   0 -15   8    5.14    0.97
   0  15  -8    1.86    1.99
   0 -15   7    1.42    1.17
   0  15  -7   -0.15    0.73
   0 -15   7   -0.55    0.81
   0 -15   7   -0.08    0.51
   0 -15   7   -1.09    1.22
   0 -15   6   11.82    1.54
   0  15  -6   16.66    1.47
   0 -15   6   16.09    1.85
   0 -15   6   14.21    1.38
   0 -15   6   16.21    1.07
   0 -15   5    7.15    0.86
   0 -15   5    8.40    1.27
   0 -15   5    9.49    1.71
   0 -15   5    7.83    1.23
   0 -15   4    5.88    1.50
   0 -15   4    6.99    1.19
   0 -15   4    6.17    0.89
   0 -15   4    4.78    1.01
   0 -15   3    8.66    1.04
   0 -15   3    9.48    1.13
   0 -15   3    9.82    1.08
   0 -15   3   10.96    1.43
   0 -15   2   23.71    1.96
   0 -15   2   21.24    1.51
   0 -15   2   20.62    1.30
   0 -15   2   19.14    1.75
   0 -15   1   33.56    1.94
   0 -15   1   37.06    1.62
   0 -15   1   33.95    2.32
   0 -15   0   24.03    2.66
   0 -15   0   21.84    1.84
   0 -15   0   26.20    2.17
   0 -15  -1    1.61    1.26
   0 -15  -1    1.85    1.88
   0 -15  -1    2.72    1.20
   0 -15  -2    2.55    2.20
   0 -15  -2    2.57    1.43
   0 -15  -2    4.11    1.40
   0 -15  -3   10.29    2.94
   0 -15  -3   12.42    1.77
   0 -15  -3   14.65    1.92
   0 -15  -4    7.66    1.76
   0 -15  -4   11.50    1.98
   0 -15  -4    9.48    2.77
   0 -15  -5   28.73    3.95
   0 -15  -5   29.38    2.79
   0 -15  -5   29.12    2.72
   0 -15  -6    1.94    1.67
   0 -15  -6    0.66    2.68
   0 -15  -6    2.15    1.82
   0 -15  -7    4.61    1.77
   0 -15  -7    4.17    3.17
   0 -15  -7    8.03    2.22
   0 -15  -8   10.71    4.19
   0 -15  -8    8.13    2.03
   0 -15  -8   10.74    2.39
   0 -15  -9    1.39    1.96
   0 -15  -9   -0.30    3.60
   0 -15  -9   -2.26    2.32
   0 -15 -10    1.03    1.83
   0 -15 -10    0.25    2.29
   0 -15 -10    2.06    3.66
   0 -15 -11    4.55    2.46
   0 -15 -11    1.05    3.91
   0 -15 -11    3.72    2.28
   0 -15 -12    0.82    2.07
   0 -15 -12    3.68    4.37
   0 -15 -12    4.73    2.74
   0 -15 -13    2.62    2.11
   0 -15 -13    0.74    4.66
   0 -15 -13    8.06    3.03
   0 -15 -14   13.61    5.65
   0 -15 -14   10.04    3.27
   0 -16  28    3.98    1.72
   0 -16  28    5.12    9.26
   0 -16  27    0.17    1.38
   0 -16  27    0.25    8.91
   0 -16  26   10.87    1.95
   0 -16  26    5.22    8.68
   0 -16  25    1.09    8.81
   0 -16  25    1.71    1.41
   0 -16  24   65.71    3.67
   0 -16  24   57.61   12.13
   0 -16  23    6.15    9.82
   0 -16  23    3.07    1.67
   0  16 -22   31.40   12.14
   0 -16  22   16.08    9.45
   0 -16  22   26.95    2.76
   0 -16  21    8.09    1.91
   0  16 -21   12.24   10.36
   0 -16  20    1.68    1.55
   0  16 -20   -4.86    8.80
   0 -16  19   77.96    3.99
   0  16 -19   57.63   12.66
   0 -16  18   17.18    2.27
   0 -16  17  172.36    5.75
   0 -16  16    2.72    1.49
   0 -16  15   64.74    3.79
   0 -16  14   25.57    2.54
   0 -16  13  194.96    6.20
   0 -16  12  122.30    4.89
   0 -16  11  183.28    5.87
   0 -16  10   97.28    2.86
   0 -16  10   94.58    4.34
   0 -16   9  220.02    4.31
   0  16  -9  208.96    8.09
   0 -16   9  201.15    5.91
   0  16  -8  334.63   10.13
   0 -16   8  346.38    5.61
   0  16  -8  344.14    5.46
   0 -16   7    8.27    1.23
   0 -16   7   11.48    1.80
   0  16  -7    9.75    1.22
   0 -16   7    9.20    0.90
   0 -16   6  454.18    5.12
   0 -16   6  434.43    6.59
   0  16  -6  442.68    6.16
   0 -16   6  442.36    7.32
   0 -16   6  433.84    8.47
   0 -16   5   20.13    1.79
   0 -16   5   27.14    2.29
   0 -16   5   29.07    2.76
   0 -16   5   21.74    1.48
   0 -16   4  300.47    7.08
   0 -16   4  297.58    4.63
   0 -16   4  292.04    5.71
   0 -16   3   39.29    1.98
   0 -16   3   41.46    2.81
   0 -16   2   27.48    1.76
   0 -16   2   26.48    2.18
   0 -16   1  236.69    5.69
   0 -16   1  253.62    5.08
   0 -16   0   85.29    3.96
   0 -16   0   90.72    3.51
   0 -16  -1  258.95    5.80
   0 -16  -1  237.03    6.03
   0 -16  -2    5.55    1.51
   0 -16  -2    1.39    1.53
   0 -16  -3   45.27    3.42
   0 -16  -3   45.67    3.41
   0 -16  -3   34.94    4.46
   0 -16  -4   55.03    3.54
   0 -16  -4   48.90    3.46
   0 -16  -4   50.42    5.00
   0 -16  -5    5.84    1.73
   0 -16  -5    2.21    1.68
   0 -16  -5    1.79    2.81
   0 -16  -6   43.59    3.26
   0 -16  -6   45.37    5.27
   0 -16  -6   50.00    3.61
   0 -16  -7   50.74    5.70
   0 -16  -7   57.13    3.86
   0 -16  -7   57.71    4.05
   0 -16  -8   60.33    4.51
   0 -16  -8   65.00    4.13
   0 -16  -9   14.02    2.73
   0 -16  -9   14.63    2.84
   0 -16 -10    9.67    2.55
   0 -16 -10    8.36    2.65
   0 -16 -11   17.52    3.28
   0 -16 -11   17.07    2.91
   0 -16 -12    9.90    2.63
   0 -16 -12    7.79    2.96
   0 -16 -13    4.77    2.95
   0 -17  28    4.34    1.73
   0 -17  27   27.08   11.19
   0 -17  27   10.63    2.08
   0 -17  26    6.20    9.44
   0 -17  26    0.97    1.44
   0 -17  25    8.66    1.94
   0 -17  25    4.08   10.00
   0 -17  24   27.48    2.69
   0 -17  24   30.74   11.13
   0 -17  23   13.76    2.20
   0 -17  23   21.44   10.33
   0  17 -22   17.75   11.28
   0 -17  22   16.22    2.25
   0 -17  21    0.43    1.50
   0  17 -21    5.26    9.35
   0  17 -20   -2.55    9.68
   0 -17  20   10.80    1.95
   0  17 -19    1.89    9.25
   0 -17  19    8.36    1.92
   0 -17  18   30.66    2.93
   0 -17  17    9.57    1.98
   0 -17  16   12.20    2.22
   0 -17  15   16.97    2.36
   0 -17  14    1.05    1.54
   0 -17  13   46.61    3.24
   0 -17  12   31.84    2.88
   0 -17  11   10.51    1.24
   0 -17  11    8.69    1.93
   0 -17  10   24.00    2.41
   0 -17  10   20.62    1.60
   0 -17   9   16.59    2.16
   0 -17   9   20.90    1.65
   0  17  -9   21.06    1.59
   0  17  -8   40.44    4.23
   0 -17   8   44.02    2.91
   0 -17   8   45.39    1.62
   0 -17   8   37.47    2.06
   0 -17   8   39.37    2.99
   0  17  -8   42.94    2.09
   0 -17   7    1.65    1.14
   0  17  -7    2.43    0.98
   0 -17   7    1.96    1.48
   0 -17   7    0.88    0.64
   0 -17   7    2.74    1.01
   0 -17   6   31.65    1.53
   0 -17   6   37.59    2.31
   0 -17   6   33.08    2.80
   0 -17   6   34.83    2.11
   0 -17   5   15.56    1.25
   0 -17   5   15.48    1.61
   0 -17   5   14.24    2.08
   0 -17   5   13.78    1.46
   0 -17   4    9.42    1.22
   0 -17   4    7.34    1.00
   0 -17   4    7.01    1.40
   0 -17   4    8.36    1.76
   0 -17   3   24.22    1.54
   0 -17   3   27.26    2.15
   0 -17   3   25.60    1.68
   0 -17   2    2.83    1.02
   0 -17   2    2.03    1.33
   0 -17   1   28.59    2.34
   0 -17   1   32.72    2.08
   0 -17   0    1.69    1.46
   0 -17   0    2.21    1.07
   0 -17  -1   -0.08    1.40
   0 -17  -1   -0.17    1.12
   0 -17  -2    3.27    1.49
   0 -17  -2    3.77    1.42
   0 -17  -3   -1.20    1.54
   0 -17  -3    4.11    1.58
   0 -17  -4    0.78    1.70
   0 -17  -4    2.71    1.52
   0 -17  -5    3.84    1.89
   0 -17  -5    2.39    1.82
   0 -17  -6    1.10    1.68
   0 -17  -6    7.50    2.15
   0 -17  -7    5.95    2.01
   0 -17  -7    6.30    2.14
   0 -17  -8    5.21    2.28
   0 -17  -8    7.38    2.23
   0 -17  -9   -1.14    2.21
   0 -17  -9    4.15    2.33
   0 -17 -10    2.30    2.12
   0 -17 -10   -3.68    2.34
   0 -17 -11   -0.29    2.27
   0 -17 -11   -2.82    2.19
   0 -17 -12    4.63    2.79
   0 -18  28   12.39    2.13
   0 -18  27   20.13    2.47
   0 -18  27   -3.87    9.43
   0 -18  26   16.33    2.28
   0 -18  26    1.67    9.87
   0 -18  25   13.49   10.23
   0 -18  25    4.57    1.80
   0 -18  24   61.67   12.69
   0 -18  24   78.29    4.27
   0 -18  23   14.15    9.23
   0 -18  23    9.98    2.22
   0  18 -23   24.67   11.75
   0 -18  22  170.72    6.03
   0  18 -22  143.13   18.72
   0 -18  21    1.02    1.63
   0  18 -21  -10.68   10.19
   0  18 -20   75.74   15.17
   0 -18  20   74.95    4.20
   0 -18  19    4.67    1.94
   0 -18  18   11.42    2.34
   0 -18  17  204.78    6.78
   0 -18  16    2.50    1.76
   0 -18  15  456.40    9.85
   0 -18  14   10.81    2.18
   0 -18  13  256.51    7.43
   0 -18  12   80.23    4.37
   0 -18  12   82.77    2.77
   0 -18  11   25.99    2.82
   0 -18  11   29.62    1.88
   0 -18  10  321.03    8.13
   0  18 -10  312.71    5.48
   0 -18  10  308.35    5.52
   0  18 -10  324.79   11.09
   0 -18   9  352.14    8.04
   0  18  -9  309.68   10.53
   0 -18   9  345.41    6.00
   0  18  -9  360.92    5.82
   0 -18   9  319.04    7.92
   0 -18   8  642.68    8.35
   0 -18   8  622.69   11.12
   0  18  -8  618.29   15.07
   0 -18   7   32.96    2.33
   0  18  -7   31.06    2.04
   0 -18   7   35.22    3.25
   0 -18   6  219.22    6.66
   0 -18   6  217.76    5.14
   0 -18   6  219.27    5.11
   0 -18   5   86.37    3.69
   0 -18   5   83.39    4.60
   0 -18   4  156.04    4.66
   0 -18   4  162.72    5.78
   0 -18   3   20.26    2.21
   0 -18   2  198.30    5.54
   0 -18   1  252.63    6.35
   0 -18   0   34.54    2.89
   0 -18  -1    0.35    3.32
   0 -18  -1  241.11    6.60
   0 -18  -2   -1.28    1.47
   0 -18  -2    0.26    1.39
   0 -18  -3   53.36    3.67
   0 -18  -3   13.05    2.25
   0 -18  -4    6.06    2.16
   0 -18  -4    2.84    1.81
   0 -18  -5   16.44    3.19
   0 -18  -5   90.27    4.69
   0 -18  -6   27.02    3.03
   0 -18  -6   30.97    3.26
   0 -18  -7   57.53    4.01
   0 -18  -8   44.17    3.86
   0 -18  -9    2.44    2.37
   0 -18 -10    2.42    2.08
   0 -19  27    4.49    1.83
   0 -19  26   -0.01   10.58
   0 -19  26    1.00    1.72
   0 -19  25    7.08    2.04
   0 -19  25    2.07   10.47
   0 -19  24   18.23    2.59
   0  19 -24    4.82   10.49
   0 -19  23   13.73   10.05
   0 -19  23    7.42    2.09
   0  19 -23   14.39   12.40
   0 -19  22   16.13    2.42
   0  19 -22   26.57   12.96
   0  19 -21    9.27   11.36
   0 -19  21    1.39    1.78
   0  19 -20    8.97   10.25
   0 -19  20   14.01    2.35
   0 -19  19    4.60    1.89
   0 -19  18   31.44    3.03
   0 -19  17   21.86    2.80
   0 -19  16    4.49    1.76
   0 -19  15   11.21    2.27
   0 -19  14   -0.49    1.63
   0 -19  13   62.91    4.07
   0 -19  12   13.86    1.50
   0 -19  12   13.34    2.23
   0  19 -11   75.94    2.86
   0 -19  11   76.32    4.34
   0 -19  11   79.78    2.95
   0 -19  10    0.06    1.64
   0  19 -10    2.76    2.91
   0 -19  10    2.10    1.12
   0 -19  10    0.56    1.56
   0  19 -10    0.60    0.97
   0 -19   9   54.18    3.65
   0  19  -9   53.83    5.08
   0 -19   9   58.21    2.70
   0 -19   9   58.69    3.44
   0  19  -8   51.12    2.43
   0  19  -8   51.83    5.18
   0 -19   8   51.30    3.01
   0 -19   8   50.91    3.69
   0 -19   8   42.53    2.43
   0 -19   7    8.28    1.44
   0 -19   7   10.04    2.09
   0 -19   7   12.28    1.68
   0 -19   6   54.96    2.87
   0 -19   6   50.84    2.50
   0 -19   6   57.20    3.73
   0 -19   5   -0.79    1.26
   0 -19   5    0.21    1.58
   0 -19   4   32.18    3.01
   0 -19   4   37.36    2.66
   0 -19   3    3.59    1.48
   0 -19   2    8.99    1.75
   0 -19   1    4.65    1.50
   0 -19   0   -0.60    1.45
   0 -19  -1   -1.29    1.67
   0 -19  -2    7.51    2.03
   0 -19  -3    6.72    1.96
   0 -19  -4    1.36    1.83
   0 -19  -5    3.32    2.10
   0 -19  -6    1.47    1.86
   0 -19  -7   -2.41    2.02
   0 -19  -8    4.34    2.32
   0 -20  27   22.90    2.81
   0 -20  26    6.93    2.12
   0 -20  26  -13.65   12.71
   0 -20  25    9.22    9.59
   0 -20  25    2.49    1.86
   0 -20  24   68.38    4.26
   0 -20  24   67.15   14.01
   0  20 -24   61.90   16.02
   0  20 -23   36.77   14.23
   0 -20  23   16.27    2.52
   0 -20  22  173.97    6.49
   0  20 -22  159.73   21.52
   0  20 -21    2.26   11.17
   0 -20  21   19.20    2.85
   0 -20  20  303.40    8.45
   0 -20  19   42.50    3.56
   0 -20  18   58.81    4.07
   0 -20  17  259.57    8.02
   0 -20  16    7.30    2.33
   0 -20  15  607.58   12.08
   0 -20  14   10.00    2.22
   0 -20  13  163.18    6.40
   0 -20  12   27.36    3.05
   0 -20  11    2.48    1.23
   0 -20  11    3.55    2.09
   0 -20  11    1.77    1.73
   0  20 -10  261.18   10.69
   0 -20  10  271.24    5.69
   0 -20  10  260.27    7.17
   0 -20  10  250.26    7.82
   0 -20   9   89.86    4.15
   0 -20   9   76.82    3.19
   0 -20   9   82.11    4.57
   0  20  -9   86.67    3.31
   0 -20   8  197.92    5.48
   0 -20   8  213.76    7.17
   0 -20   8  203.23    5.15
   0 -20   7   15.34    2.83
   0 -20   7   11.32    1.85
   0 -20   6   34.03    3.19
   0 -20   6   31.59    2.36
   0 -20   5   15.84    2.33
   0 -20   5   23.63    2.96
   0 -20   4  404.30    9.75
   0 -20   4  377.54    7.71
   0 -20   3  107.36    4.35
   0 -20   2  149.69    5.35
   0 -20   1  204.32    6.23
   0 -20   0   24.67    2.71
   0 -20  -1  148.14    5.79
   0 -20  -2   34.42    3.32
   0 -20  -3   72.32    4.32
   0 -20  -4   11.24    2.32
   0 -20  -5   27.97    3.25
   0 -20  -6   72.76    4.80
   0 -20  -7    5.09    2.50
   0 -21  26    5.34    2.15
   0 -21  25    3.38   11.05
   0 -21  25    0.51    1.85
   0  21 -25  -11.83   13.00
   0 -21  24   14.46    2.48
   0  21 -24   24.15   12.74
   0 -21  24   40.00   13.22
   0  21 -23   -5.10   12.03
   0 -21  23    1.55    1.87
   0  21 -22   10.07   11.21
   0 -21  22   16.06    2.68
   0  21 -21   12.37   11.72
   0 -21  21    8.21    2.25
   0 -21  20   36.42    3.49
   0 -21  19   21.04    2.89
   0 -21  18   21.80    3.01
   0 -21  17   17.79    2.78
   0 -21  16   27.31    3.06
   0 -21  15    6.12    2.24
   0 -21  14    9.58    2.48
   0 -21  13   18.98    2.66
   0 -21  13   18.40    2.79
   0 -21  12   12.38    2.40
   0 -21  12   11.14    2.39
   0 -21  11   23.04    2.90
   0 -21  11   27.99    2.79
   0 -21  10    0.44    1.59
   0 -21  10    3.71    1.22
   0 -21  10    3.55    1.83
   0  21  -9    5.05    3.42
   0 -21   9    1.82    1.47
   0 -21   9    7.29    2.17
   0 -21   9    2.63    1.11
   0 -21   8    6.07    1.40
   0 -21   8    4.68    1.98
   0 -21   7    9.29    1.59
   0 -21   7   18.00    2.75
   0 -21   6    5.78    2.22
   0 -21   6    4.94    1.60
   0 -21   5   16.66    2.12
   0 -21   5   22.61    2.88
   0 -21   4    6.33    1.66
   0 -21   4    6.71    2.08
   0 -21   3    2.77    2.06
   0 -21   3    1.54    1.43
   0 -21   2   35.62    2.96
   0 -21   1   -0.08    1.57
   0 -21   0    9.73    2.13
   0 -21  -1    1.02    1.85
   0 -21  -2   -0.24    1.81
   0 -21  -3   19.52    2.79
   0 -21  -4    0.93    1.89
   0 -21  -5   12.65    2.74
   0 -21  -6   -1.12    2.17
   0 -22  25    5.39    2.19
   0 -22  24   15.50    2.74
   0  22 -24   16.76   13.39
   0 -22  24   14.49   11.41
   0 -22  23    1.57    2.04
   0  22 -23    0.31   10.75
   0  22 -22   42.41   14.82
   0 -22  22   50.46    3.95
   0  22 -21   31.14   12.91
   0 -22  21   34.23    3.37
   0 -22  20  111.20    5.65
   0 -22  19   14.56    2.65
   0 -22  18   41.16    3.83
   0 -22  17   75.19    4.90
   0 -22  16   24.31    3.23
   0 -22  15  257.66    8.48
   0 -22  14   22.81    3.04
   0 -22  14   21.62    3.20
   0 -22  13  188.54    7.49
   0 -22  13  196.32    7.24
   0 -22  12   19.49    2.99
   0 -22  12   14.59    2.42
   0 -22  11  156.35    5.89
   0 -22  11  147.25    6.54
   0  22 -10   86.76    7.21
   0 -22  10   85.26    5.16
   0 -22   9  146.04    6.37
   0 -22   9  138.55    4.55
   0  22  -9  135.08    8.39
   0  22  -8  123.14    8.50
   0 -22   8  141.23    6.53
   0 -22   8  130.48    4.69
   0 -22   7   18.44    3.05
   0 -22   7   13.44    1.99
   0 -22   6  178.60    5.53
   0 -22   6  194.45    7.34
   0 -22   5   31.11    3.65
   0 -22   5   26.55    2.65
   0 -22   4  113.80    4.72
   0 -22   4  134.08    6.25
   0 -22   3    5.28    1.81
   0 -22   3    5.88    2.28
   0 -22   2   82.90    4.38
   0 -22   1   20.34    2.67
   0 -22   0    7.14    2.09
   0 -22  -1   26.58    3.12
   0 -22  -2    3.21    2.05
   0 -22  -3   44.86    3.90
   0 -22  -4    5.85    2.30
   0 -22  -5    9.50    2.64
   0 -23  25   17.69    2.79
   0 -23  24    3.01    2.17
   0 -23  24    4.76    9.40
   0  23 -24   18.32   14.94
   0  23 -23   18.29   13.75
   0 -23  23   14.92    2.72
   0  23 -22   60.11   16.56
   0 -23  22   28.40    3.35
   0 -23  21   -2.84    2.11
   0 -23  20    2.31    2.04
   0 -23  19    0.23    2.01
   0 -23  18   17.31    3.00
   0 -23  17   10.38    2.50
   0 -23  16   26.05    3.35
   0 -23  15   16.26    2.94
   0 -23  15   15.01    2.73
   0 -23  14    6.24    2.43
   0 -23  14    6.32    2.42
   0 -23  13   41.08    3.90
   0 -23  13   36.96    3.54
   0 -23  12   -0.86    2.03
   0 -23  12    1.79    1.72
   0 -23  11   14.12    2.69
   0 -23  10    3.03    2.07
   0  23 -10    4.30    3.71
   0  23  -9    7.59    3.42
   0 -23   9    6.86    2.46
   0  23  -8   37.63    5.53
   0 -23   8   33.61    2.62
   0 -23   8   31.03    3.53
   0 -23   7    5.76    1.70
   0 -23   7    8.29    2.41
   0 -23   6    8.73    2.59
   0 -23   6    6.77    1.75
   0 -23   5    3.72    2.13
   0 -23   5    3.74    1.57
   0 -23   4    2.84    1.66
   0 -23   4    0.74    1.90
   0 -23   3    0.71    2.03
   0 -23   3    0.84    1.88
   0 -23   2   14.32    2.44
   0 -23   2   11.72    2.76
   0 -23   1    0.16    1.83
   0 -23   0   25.46    3.01
   0 -23  -1    2.02    1.93
   0 -23  -2   13.46    2.75
   0 -23  -3   -1.53    2.17
   0 -24  24   34.08    3.55
   0 -24  23    3.56    2.25
   0  24 -23    6.03   11.77
   0  24 -22   10.85   12.34
   0 -24  22   30.12    3.49
   0 -24  21    4.45    2.32
   0 -24  20   24.74    3.50
   0 -24  19    2.19    2.15
   0 -24  18  111.55    6.04
   0 -24  17   19.24    3.43
   0 -24  17   17.17    3.01
   0 -24  16   98.41    6.02
   0 -24  16  107.50    5.92
   0 -24  15   62.68    4.91
   0 -24  15   58.02    4.69
   0 -24  14   17.36    3.15
   0 -24  14    5.40    2.34
   0 -24  13  167.99    7.46
   0 -24  12    4.91    2.59
   0  24 -11  225.75   11.44
   0 -24  11  204.13    8.14
   0 -24  10   25.31    3.58
   0  24 -10   24.37    5.23
   0 -24   9  132.82    6.57
   0  24  -9  117.41    9.00
   0 -24   8   69.28    5.00
   0  24  -8   58.69    6.72
   0 -24   7   28.56    2.69
   0 -24   7   32.38    3.89
   0 -24   6   46.20    4.27
   0 -24   6   40.44    3.10
   0 -24   5    0.25    1.87
   0 -24   5    3.71    2.64
   0 -24   4   91.72    5.75
   0 -24   4   81.29    4.42
   0 -24   3   -1.57    2.16
   0 -24   3    3.00    1.92
   0 -24   2   82.63    4.73
   0 -24   2   92.95    5.94
   0 -24   1    6.71    2.28
   0 -24   1    7.88    2.90
   0 -24   0    6.24    2.18
   0 -24  -1   28.39    3.34
   0 -24  -2    6.77    2.55
   0 -25  23    5.92    2.39
   0  25 -22    8.57   14.36
   0 -25  22    7.36    2.68
   0 -25  21    6.44    2.56
   0 -25  20   10.53    2.91
   0 -25  19    0.78    2.04
   0 -25  18   18.10    3.54
   0 -25  18   15.11    3.00
   0 -25  17    5.24    2.78
   0 -25  17    0.55    2.28
   0 -25  16   25.79    3.56
   0 -25  16   21.88    3.37
   0 -25  15    8.96    2.73
   0 -25  14   19.22    3.21
   0 -25  13   19.66    3.23
   0 -25  12    3.71    2.42
   0 -25  11   32.37    3.93
   0  25 -11   38.75    5.88
   0 -25  10   -4.02    2.69
   0  25 -10    0.90    3.46
   0  25  -9   21.60    5.00
   0 -25   9   22.48    3.34
   0  25  -8   15.21    4.93
   0 -25   8   10.15    3.00
   0 -25   7   10.13    2.88
   0 -25   6   14.95    2.36
   0 -25   6   15.81    3.07
   0 -25   5   -0.55    2.36
   0 -25   5    2.00    1.75
   0 -25   4    3.72    2.84
   0 -25   4    0.49    1.80
   0 -25   3   -2.21    2.34
   0 -25   3   -0.28    1.82
   0 -25   2    1.12    1.83
   0 -25   2    1.83    2.37
   0 -25   1   11.39    3.27
   0 -25   1    2.61    2.04
   0 -25   0    3.99    2.22
   0 -26  22   96.63    6.00
   0 -26  21    6.81    2.90
   0 -26  20   36.18    4.75
   0 -26  20   51.15    4.70
   0 -26  19    2.34    2.81
   0 -26  19    1.85    2.45
   0 -26  18   57.38    5.11
   0 -26  18   57.27    4.87
   0 -26  17   -0.02    2.20
   0 -26  16   68.93    5.38
   0 -26  15   62.30    5.25
   0 -26  14    4.76    2.66
   0 -26  13  110.29    6.37
   0 -26  12   10.23    3.05
   0 -26  11   48.30    4.74
   0  26 -10   14.67    5.22
   0 -26  10    7.75    2.84
   0 -26   9   50.41    4.71
   0  26  -9   54.04    7.11
   0 -26   8   27.48    4.01
   0  26  -8   32.90    6.22
   0 -26   7   36.27    4.27
   0 -26   6   84.76    6.04
   0 -26   5   16.15    2.61
   0 -26   5   26.71    4.10
   0 -26   4   26.32    3.22
   0 -26   4   36.44    4.48
   0 -26   3   22.28    3.11
   0 -26   3   34.59    4.36
   0 -26   2   24.01    3.05
   0 -26   1   15.47    2.98
   0 -27  21   -2.06    2.58
   0 -27  21    2.47    3.05
   0 -27  20    3.72    3.03
   0 -27  20   -0.69    2.51
   0 -27  19   -0.40    2.60
   0 -27  18   18.58    3.55
   0 -27  17    4.27    2.84
   0 -27  16   36.10    4.22
   0 -27  15    4.14    2.75
   0 -27  14    7.09    3.26
   0 -27  13    6.07    2.79
   0 -27  12    9.75    2.97
   0 -27  11    7.12    2.96
   0 -27  10    8.35    2.77
   0  27 -10    3.21    4.27
   0  27  -9   25.50    6.07
   0 -27   9   20.19    3.68
   0 -27   8   -1.94    2.72
   0  27  -8   -0.78    4.61
   0  27  -7   14.39    5.59
   0 -27   7   12.21    3.38
   0 -27   6    1.39    2.88
   0 -28  19    6.13    3.36
   0 -28  18   36.97    4.67
   0 -28  17   16.87    3.51
   0 -28  16   53.75    5.21
   0 -28  15   32.03    4.24
   0 -28  14   33.41    4.52
   0 -28  13   -0.12    2.54
   0 -28  12   95.31    6.61
   0 -28  11  123.71    7.40
   0 -28  10    2.27    3.18
   0  28 -10    5.71    5.45
   0 -28   9   60.46    5.51
   0  28  -9   61.27    8.05
  -1  28  -9   35.81    7.54
   1 -28  10   26.36    4.11
   1 -28  11    6.27    3.17
   1 -28  12   17.44    3.87
   1 -28  13   21.86    4.03
   1 -28  14    4.12    3.18
   1 -28  15    5.66    3.03
   1 -28  16   55.66    5.23
   1 -28  17   26.74    4.30
   1 -28  18    2.93    2.76
   1 -27   6    3.31    2.94
  -1  27  -6   11.79    5.46
   1 -27   7    0.43    2.75
  -1  27  -7   10.92    5.20
   1 -27   8   21.85    3.74
  -1  27  -8   18.02    5.65
   1 -27   9    3.44    2.50
  -1  27  -9    1.50    4.38
   1 -27  10   58.50    5.33
   1 -27  11    2.47    2.97
   1 -27  12   29.62    4.31
   1 -27  13    0.98    2.48
   1 -27  14   31.00    4.36
   1 -27  15   37.49    4.51
   1 -27  16   25.19    3.86
   1 -27  17   48.38    4.80
   1 -27  18   28.99    4.10
   1 -27  19   64.12    5.34
   1 -27  20    1.80    2.73
   1 -27  21   38.16    4.52
   1 -26   1   51.90    4.33
   1 -26   2    1.59    2.03
   1 -26   3   21.54    2.97
   1 -26   4    3.64    2.89
   1 -26   5    1.85    2.41
  -1  26  -6   10.28    5.50
   1 -26   6    3.64    2.62
  -1  26  -7   18.69    5.83
   1 -26   7   24.03    3.78
   1 -26   8   14.02    3.37
  -1  26  -8   24.45    6.23
  -1  26  -9   28.53    6.00
   1 -26   9   14.93    3.30
   1 -26  10    5.06    2.88
   1 -26  11   13.08    3.21
   1 -26  12    6.40    2.88
   1 -26  13   -1.06    2.29
   1 -26  14   23.18    3.67
   1 -26  15   11.47    3.04
   1 -26  16   19.35    3.49
   1 -26  17   11.43    3.20
   1 -26  18    2.12    2.71
   1 -26  19    2.77    2.70
   1 -26  20    7.61    2.87
   1 -26  21   36.79    4.22
   1 -26  22    3.87    2.87
   1 -26  23   70.50    5.33
   1 -25  -1   27.41    3.43
   1 -25   0   17.86    2.97
   1 -25   1   30.42    3.45
   1 -25   1   29.09    4.15
   1 -25   2   30.45    4.08
   1 -25   2   20.38    3.00
   1 -25   3   31.72    4.21
   1 -25   3   27.34    3.12
   1 -25   4    4.92    2.95
   1 -25   4    2.32    1.99
   1 -25   5  109.46    6.57
   1 -25   6   26.02    4.02
   1 -25   7   42.63    4.55
  -1  25  -7   42.05    6.36
  -1  25  -8   13.05    4.89
   1 -25   8    9.08    2.65
   1 -25   9   30.21    3.97
  -1  25  -9   37.97    6.02
   1 -25  10   34.75    3.93
  -1  25 -10   35.46    6.04
   1 -25  11    9.26    2.76
   1 -25  12  101.21    6.18
   1 -25  13    3.24    2.60
   1 -25  14  147.52    7.42
   1 -25  15    4.66    2.74
   1 -25  16   49.21    4.58
   1 -25  17   17.08    3.22
   1 -25  18   19.84    3.41
   1 -25  19  113.97    6.53
   1 -25  20   -2.83    2.48
   1 -25  21   55.30    4.80
   1 -25  22   27.92    3.76
   1 -25  23   14.05    3.08
   1 -25  24   15.91    3.03
   1 -24  -2   15.30    2.94
   1 -24  -1    7.89    2.35
   1 -24   0   17.82    3.60
   1 -24   0   19.94    3.01
   1 -24   1    8.23    2.37
   1 -24   1    9.44    2.71
   1 -24   2    7.95    2.84
   1 -24   2    3.06    1.90
   1 -24   3   22.42    3.77
   1 -24   3   22.75    2.83
   1 -24   4    5.04    1.86
   1 -24   4    4.66    2.60
   1 -24   5   56.07    4.76
   1 -24   5   51.89    3.59
   1 -24   6    7.96    1.94
   1 -24   6   -1.43    2.30
  -1  24  -7   33.33    5.88
   1 -24   7   30.72    3.67
  -1  24  -8   36.34    5.91
   1 -24   8   32.16    3.88
   1 -24   9   32.76    3.77
  -1  24  -9   25.14    4.94
   1 -24  10   46.98    4.43
  -1  24 -10   70.89    7.30
   1 -24  11    2.73    2.34
   1 -24  12   38.01    4.05
   1 -24  13    4.56    2.47
   1 -24  14   46.84    4.34
   1 -24  15    1.04    2.19
   1 -24  16   66.25    5.03
   1 -24  17   13.08    2.93
   1 -24  18   18.46    3.20
   1 -24  19    6.95    2.68
   1 -24  20    6.93    2.51
   1 -24  21    5.99    2.47
   1 -24  22   10.33    2.58
   1 -24  23   58.75    4.59
   1 -24  24    0.48    2.16
   1 -24  25   10.17    2.63
   1 -23  -3    7.27    2.51
   1 -23  -2    6.85    2.46
   1 -23  -1   32.92    3.32
   1 -23   0   18.24    2.92
   1 -23   1    4.46    2.09
   1 -23   1    6.58    2.61
   1 -23   2   37.18    4.02
   1 -23   2   28.75    2.98
   1 -23   3   21.99    2.65
   1 -23   3   23.92    3.61
   1 -23   4   11.63    2.94
   1 -23   4   10.57    2.18
   1 -23   5   56.09    3.49
   1 -23   5   66.46    4.87
   1 -23   6   21.48    2.60
   1 -23   6   19.45    3.38
   1 -23   7   96.49    5.61
   1 -23   7   85.67    3.98
  -1  23  -7   94.77    7.86
   1 -23   8   37.78    3.96
  -1  23  -8   36.58    5.70
   1 -23   9   92.74    5.47
  -1  23  -9   82.85    7.05
   1 -23  10   55.94    4.51
  -1  23 -10   71.03    6.94
   1 -23  11    2.23    2.12
   1 -23  12  190.96    7.68
   1 -23  13    2.20    2.28
   1 -23  13    3.00    2.12
   1 -23  14  130.80    6.68
   1 -23  15    0.87    2.13
   1 -23  16   31.33    3.55
   1 -23  17   57.01    4.56
   1 -23  18   14.01    2.85
   1 -23  19   88.04    5.40
   1 -23  20   14.62    2.82
   1 -23  21   29.39    3.53
   1 -23  22    2.59    2.25
  -1  23 -23   61.21   15.93
   1 -23  23   49.65    4.26
   1 -23  24   39.61    3.84
   1 -23  25   19.31    2.96
   1 -23  26   42.19    3.97
   1 -22  -5    1.47    2.22
   1 -22  -4    2.54    2.21
   1 -22  -3    3.08    1.97
   1 -22  -2    5.92    2.15
   1 -22  -1    2.82    2.04
   1 -22   0   48.88    3.76
   1 -22   1    3.57    1.89
   1 -22   2   31.38    2.96
   1 -22   2   31.93    3.68
   1 -22   3   26.68    3.22
   1 -22   3   27.95    2.81
   1 -22   4   15.27    2.86
   1 -22   4   12.08    2.10
   1 -22   5   76.33    5.01
   1 -22   5   65.43    3.60
   1 -22   6    3.93    1.98
   1 -22   6    6.61    1.65
   1 -22   7   75.82    5.02
   1 -22   7   69.74    3.43
  -1  22  -7   76.52    6.99
   1 -22   8   13.42    2.79
  -1  22  -8   11.60    4.15
   1 -22   8   11.02    1.70
   1 -22   9   57.75    4.39
  -1  22  -9   46.63    5.73
   1 -22  10   33.87    3.65
   1 -22  11   13.32    2.33
   1 -22  11   13.86    2.81
   1 -22  12   67.99    4.54
   1 -22  12   74.74    4.84
   1 -22  13    6.98    2.41
   1 -22  14  110.15    5.98
   1 -22  15    5.53    2.35
   1 -22  16   43.13    4.02
   1 -22  17   12.08    2.86
   1 -22  18   39.08    3.82
   1 -22  19   26.05    3.33
   1 -22  20   26.95    3.28
   1 -22  21   20.54    3.03
   1 -22  22    1.99    1.94
   1 -22  23    5.34    2.01
  -1  22 -23   28.33   14.71
   1 -22  24    1.91    1.87
  -1  22 -24    9.17   12.84
   1 -22  25    3.38    1.91
   1 -22  26    2.87    2.28
   1 -21  -6   31.54    3.64
   1 -21  -5    1.46    2.03
   1 -21  -4   25.75    3.24
   1 -21  -3    2.66    1.99
   1 -21  -2   30.21    3.17
   1 -21  -1   -0.55    1.82
   1 -21   0   12.74    2.24
   1 -21   1   36.87    3.17
   1 -21   2    7.00    1.99
   1 -21   2    2.48    1.96
   1 -21   3   35.70    2.97
   1 -21   3   34.25    3.38
   1 -21   4   10.88    2.60
   1 -21   4    7.68    1.81
   1 -21   5   95.12    5.23
   1 -21   5   93.15    3.99
   1 -21   6    9.09    2.42
   1 -21   6   10.35    2.00
  -1  21  -7   40.25    5.31
   1 -21   7   35.16    2.50
   1 -21   7   42.10    3.72
   1 -21   8    8.54    2.37
   1 -21   8   12.25    1.57
  -1  21  -8    6.77    3.51
   1 -21   9   32.13    3.34
   1 -21   9   28.56    2.08
  -1  21  -9   26.96    4.35
   1 -21  10  179.49    7.03
   1 -21  10  186.22    6.19
   1 -21  11   19.49    2.86
   1 -21  11   17.91    2.63
   1 -21  12  133.16    6.07
   1 -21  13   34.14    3.55
   1 -21  14   48.39    4.06
   1 -21  15   12.57    2.54
   1 -21  16   74.41    4.70
   1 -21  17   36.54    3.57
   1 -21  18   72.86    4.84
   1 -21  19   32.30    3.43
   1 -21  20   45.05    3.82
   1 -21  21   48.67    4.04
   1 -21  22    8.95    2.30
  -1  21 -22    3.03   12.02
  -1  21 -23   -0.22   11.04
   1 -21  23   10.56    2.30
   1 -21  24   -0.02    1.72
  -1  21 -24   -2.20   11.44
   1 -21  25   39.81    3.57
  -1  21 -25   16.55   13.04
   1 -21  26   14.42    2.62
   1 -21  27   28.92    3.23
   1 -20  -7    3.07    2.10
   1 -20  -6    1.27    1.96
   1 -20  -5   35.94    3.53
   1 -20  -4   47.99    3.77
   1 -20  -3    2.25    1.85
   1 -20  -2   58.34    3.89
   1 -20  -1    4.12    1.92
   1 -20   0   40.51    3.12
   1 -20   1    1.94    1.67
   1 -20   2   99.92    4.37
   1 -20   3   95.58    4.16
   1 -20   3  102.89    5.31
   1 -20   4    3.59    1.81
   1 -20   4    5.27    1.90
   1 -20   5   45.95    3.70
   1 -20   5   43.09    2.74
   1 -20   6   33.26    2.41
   1 -20   6   42.30    3.69
   1 -20   7   47.69    2.71
  -1  20  -7   49.16    5.52
   1 -20   7   45.81    3.67
   1 -20   8   86.86    3.83
   1 -20   8   78.93    3.24
   1 -20   8   94.88    5.06
  -1  20  -8   88.89    6.97
   1 -20   9  206.81    4.96
  -1  20  -9  208.45    9.94
   1 -20   9  204.60    6.16
   1 -20   9  214.18    7.21
   1 -20  10    6.20    2.34
   1 -20  11   85.65    4.77
   1 -20  12   60.45    4.24
   1 -20  13   80.04    4.89
   1 -20  14  223.67    7.59
   1 -20  15    3.10    2.14
   1 -20  16  102.74    5.37
   1 -20  17    3.83    1.99
   1 -20  18   52.10    3.99
   1 -20  19   36.15    3.53
   1 -20  20    5.51    2.11
   1 -20  21   33.24    3.40
   1 -20  22   33.16    3.30
  -1  20 -22   22.51   10.50
  -1  20 -23   37.88   15.34
   1 -20  23   47.98    3.76
   1 -20  24   18.10    2.57
  -1  20 -24   15.39   12.15
  -1  20 -25   18.53   13.24
   1 -20  25   -0.98    2.10
   1 -20  26    8.34    9.65
   1 -20  26   -0.94    1.90
   1 -20  27    9.56    2.29
   1 -19  -9   13.60    2.89
   1 -19  -8    8.03    2.59
   1 -19  -7    1.35    1.94
   1 -19  -6    3.41    2.14
   1 -19  -5   15.43    2.63
   1 -19  -4   38.00    3.39
   1 -19  -3   31.52    3.07
   1 -19  -2   89.19    4.43
   1 -19  -1    2.49    1.75
   1 -19   0    1.85    1.69
   1 -19   1   34.69    2.78
   1 -19   2   26.84    2.46
   1 -19   3  106.92    5.13
   1 -19   3  100.54    4.05
   1 -19   4   78.90    3.49
   1 -19   4   81.34    4.54
   1 -19   5   85.25    3.46
   1 -19   5   84.37    4.58
   1 -19   6   38.77    3.30
   1 -19   6   34.60    2.37
  -1  19  -7   62.52    5.68
   1 -19   7   55.38    3.06
   1 -19   7   64.49    4.12
   1 -19   7   51.39    2.65
  -1  19  -8    8.68    3.29
   1 -19   8    8.84    2.07
   1 -19   8   11.73    1.95
   1 -19   8    5.62    1.22
   1 -19   9  163.03    6.08
  -1  19  -9  178.98    8.96
   1 -19   9  176.92    4.34
   1 -19  10   53.94    2.42
   1 -19  10   52.98    3.86
   1 -19  11  299.53    8.37
   1 -19  12   23.89    3.00
   1 -19  13   25.94    3.01
   1 -19  14   26.12    2.99
   1 -19  15   22.88    2.81
   1 -19  16   84.40    4.72
   1 -19  17   17.92    2.77
   1 -19  18   59.55    4.08
   1 -19  19   33.43    3.24
   1 -19  20   32.45    3.21
   1 -19  21   40.74    3.51
  -1  19 -22   14.34   10.95
   1 -19  22   23.78    2.89
   1 -19  23   61.31    4.05
  -1  19 -23   27.84   13.75
  -1  19 -24   25.45   12.13
   1 -19  24    5.13    2.13
  -1  19 -25   55.96   16.42
   1 -19  25   77.56   15.24
   1 -19  25   81.65    4.47
   1 -19  26  -17.40   12.02
   1 -19  26   -0.52    1.63
   1 -19  27   61.30    3.97
   1 -18 -11   23.43    3.66
   1 -18 -10    4.23    2.44
   1 -18 -10    3.63    2.13
   1 -18  -9   40.62    3.97
   1 -18  -9   37.52    3.73
   1 -18  -8    1.75    2.03
   1 -18  -8    6.44    2.38
   1 -18  -7   74.74    4.58
   1 -18  -7   66.11    4.50
   1 -18  -6   45.36    3.73
   1 -18  -6   50.56    3.96
   1 -18  -5   18.61    2.51
   1 -18  -5   19.41    2.73
   1 -18  -4   57.56    3.62
   1 -18  -4   63.71    3.92
   1 -18  -3   10.01    2.16
   1 -18  -3    7.69    1.78
   1 -18  -2   39.10    3.09
   1 -18  -2   35.97    2.78
   1 -18  -1    2.58    1.40
   1 -18  -1    3.24    1.69
   1 -18   0  111.78    4.06
   1 -18   0  104.07    4.41
   1 -18   1   36.61    2.79
   1 -18   1   36.86    2.34
   1 -18   2  151.26    4.23
   1 -18   2  151.08    4.79
   1 -18   3   29.48    2.40
   1 -18   3   29.77    2.94
   1 -18   3   32.44    2.03
   1 -18   4    2.77    0.96
   1 -18   4    2.39    1.48
   1 -18   4    2.51    1.13
   1 -18   5    7.27    1.39
   1 -18   5    6.04    1.98
   1 -18   5    8.97    1.24
   1 -18   6   18.63    2.48
   1 -18   6   17.51    1.82
   1 -18   6   15.01    1.39
   1 -18   6   14.65    1.63
   1 -18   7  490.15    6.09
  -1  18  -7  473.71   13.53
   1 -18   7  478.51    7.25
   1 -18   7  486.24    8.27
   1 -18   7  483.05   10.00
   1 -18   8   -0.85    1.67
   1 -18   8   -0.28    0.96
  -1  18  -8    1.70    1.22
  -1  18  -8    2.51    3.11
   1 -18   8    1.63    0.84
   1 -18   9   95.40    3.09
   1 -18   9   97.74    4.80
   1 -18  10    5.52    1.08
   1 -18  10    8.09    2.18
  -1  18 -11   14.61    1.31
   1 -18  11   11.56    1.31
   1 -18  11    8.77    2.06
   1 -18  12   26.89    2.84
   1 -18  13  124.83    5.46
   1 -18  14   77.08    4.51
   1 -18  15   23.06    2.67
   1 -18  16  131.37    5.69
   1 -18  17    2.96    1.93
   1 -18  18  131.34    5.63
   1 -18  19    4.48    1.77
   1 -18  20   20.13    2.67
   1 -18  21   37.34    3.26
  -1  18 -21   20.19   10.26
  -1  18 -22   38.27   13.44
   1 -18  22   39.44    3.36
  -1  18 -23   34.06   13.17
   1 -18  23   55.44    3.79
  -1  18 -24    4.89   11.18
   1 -18  24    7.39    2.06
   1 -18  25    8.13    1.99
   1 -18  25   31.77   11.96
   1 -18  26   -0.23   10.37
   1 -18  26    0.14    1.64
   1 -18  27    3.57   10.89
   1 -18  27   13.01    2.27
   1 -18  28   -0.12    1.53
   1 -17 -13    7.15    3.12
   1 -17 -12   34.15    4.22
   1 -17 -11   -2.35    2.24
   1 -17 -11    1.03    2.28
   1 -17 -10   10.64    2.55
   1 -17 -10   13.52    2.89
   1 -17  -9   18.45    2.97
   1 -17  -9   14.27    2.87
   1 -17  -8    2.48    1.89
   1 -17  -8    7.11    2.42
   1 -17  -7   32.52    3.17
   1 -17  -7   41.39    3.52
   1 -17  -6   -2.14    1.69
   1 -17  -6    0.93    1.68
   1 -17  -5   14.50    2.26
   1 -17  -5   15.07    2.48
   1 -17  -4   12.13    2.15
   1 -17  -4   11.14    1.93
   1 -17  -3   12.01    1.91
   1 -17  -3    9.82    2.01
   1 -17  -2   36.67    2.95
   1 -17  -2   28.08    2.49
   1 -17  -1    4.24    1.34
   1 -17  -1    5.06    1.62
   1 -17   0  106.77    3.84
   1 -17   0   96.63    4.06
   1 -17   1   -0.07    1.26
   1 -17   1    0.84    1.03
   1 -17   2  306.72    6.43
   1 -17   2  340.17    6.02
   1 -17   3   25.87    2.10
   1 -17   3   21.58    2.59
   1 -17   3   26.78    1.82
   1 -17   4  333.94    5.47
   1 -17   4  309.14    5.06
   1 -17   4  317.22    7.81
   1 -17   4  319.11    6.19
   1 -17   5  172.21    3.80
   1 -17   5  165.23    4.18
   1 -17   5  160.32    4.29
   1 -17   5  162.61    5.70
   1 -17   6  115.34    3.06
   1 -17   6  110.58    3.82
   1 -17   6  105.54    3.43
   1 -17   6  119.47    5.01
   1 -17   7  337.83    8.07
   1 -17   7  349.46    5.84
   1 -17   7  353.40    5.02
  -1  17  -7  322.20   10.90
  -1  17  -7  362.48    5.40
   1 -17   7  322.78    7.02
   1 -17   8   10.31    1.10
  -1  17  -8    9.72    3.43
   1 -17   8    6.50    1.12
   1 -17   8    7.66    2.13
   1 -17   9  347.11    5.40
  -1  17  -9  356.41   11.40
  -1  17 -10    2.86    0.86
   1 -17  10    5.37    1.00
   1 -17  10    3.80    1.68
   1 -17  11  284.11    7.75
   1 -17  11  309.17    4.78
   1 -17  12   76.55    4.27
   1 -17  13   65.77    3.95
   1 -17  14  139.08    5.55
   1 -17  15    5.06    1.75
   1 -17  16  226.41    7.05
   1 -17  17    4.02    1.90
   1 -17  18   94.53    4.65
   1 -17  19   -0.64    1.62
   1 -17  20   50.62    3.61
   1 -17  21   55.86    3.64
  -1  17 -21   37.90   11.95
   1 -17  22   28.02    2.83
  -1  17 -22   31.83   12.64
   1 -17  23   44.75    3.44
  -1  17 -23   46.69   13.87
   1 -17  24    4.35    1.64
   1 -17  24    4.73    9.34
   1 -17  25   24.51    2.66
   1 -17  25   16.65   10.32
   1 -17  26    2.37    1.53
   1 -17  26   16.88   10.83
   1 -17  27   48.59    3.42
   1 -17  27   58.42   13.80
   1 -17  28    3.75    1.81
   1 -16 -13   21.73    3.76
   1 -16 -12   10.24    2.96
   1 -16 -12    9.53    2.70
   1 -16 -11    4.37    2.47
   1 -16 -11    3.23    2.21
   1 -16 -10    4.21    2.38
   1 -16 -10    1.31    2.24
   1 -16  -9   13.88    2.47
   1 -16  -9   14.16    2.69
   1 -16  -8    4.84    3.47
   1 -16  -8    7.02    2.20
   1 -16  -8    1.64    2.19
   1 -16  -7   27.91    2.99
   1 -16  -7   33.66    3.19
   1 -16  -6    0.80    1.66
   1 -16  -6   -0.82    1.68
   1 -16  -5   14.81    2.55
   1 -16  -5   11.32    2.28
   1 -16  -4   16.51    2.39
   1 -16  -4   11.41    3.12
   1 -16  -4   18.69    2.29
   1 -16  -3  220.00    5.98
   1 -16  -3  216.30    6.16
   1 -16  -2   30.04    2.63
   1 -16  -2   24.80    2.29
   1 -16  -1   85.55    3.53
   1 -16  -1   83.80    3.78
   1 -16   0   21.65    2.13
   1 -16   0   21.97    1.94
   1 -16   1   33.94    2.09
   1 -16   1   36.35    2.48
   1 -16   2  361.01    5.99
   1 -16   2  321.28    6.33
   1 -16   3   56.94    2.07
   1 -16   3   58.94    3.49
   1 -16   3   62.91    2.51
   1 -16   3   57.51    2.68
   1 -16   4   41.29    2.95
   1 -16   4   42.87    2.34
   1 -16   4   46.28    2.08
   1 -16   4   42.07    2.05
   1 -16   5   66.72    2.35
   1 -16   5   65.59    2.71
   1 -16   5   60.73    3.47
   1 -16   5   60.75    2.75
  -1  16  -6    0.89    0.79
   1 -16   6    1.60    0.85
   1 -16   6    0.67    0.85
   1 -16   6    0.85    1.62
   1 -16   6    1.80    1.11
  -1  16  -7  417.93   11.90
   1 -16   7  464.54    5.57
   1 -16   7  427.72    8.74
   1 -16   7  459.96    6.31
   1 -16   8    0.86    0.68
   1 -16   8    0.19    0.80
   1 -16   8   -0.05    1.37
   1 -16   9   75.33    3.96
  -1  16  -9   74.56    2.34
   1 -16   9   76.24    2.52
   1 -16  10   25.80    1.51
   1 -16  10   28.60    2.72
   1 -16  11   91.90    2.54
   1 -16  11   85.56    4.45
   1 -16  12   31.28    1.62
   1 -16  12   39.32    3.25
   1 -16  13  130.35    5.25
   1 -16  14    3.33    1.91
   1 -16  15   37.10    3.11
   1 -16  16   89.51    4.47
   1 -16  17   65.18    3.97
   1 -16  18   52.74    3.48
   1 -16  19   13.05    2.14
   1 -16  20    3.50    1.63
  -1  16 -20    9.34    8.39
   1 -16  21   40.47    3.20
  -1  16 -21   60.43   13.77
  -1  16 -22   11.70    9.77
   1 -16  22   20.40    2.58
   1 -16  23   11.96    2.09
  -1  16 -23   25.80   11.51
   1 -16  24   -2.15    1.74
   1 -16  24   27.62   11.21
   1 -16  25    0.30    9.46
   1 -16  25    3.81    1.78
   1 -16  26    0.21    1.55
   1 -16  26    8.08    9.85
   1 -16  27    1.81    1.57
   1 -16  27    6.37    8.76
   1 -16  28   14.37    2.30
   1 -16  28   18.08    9.86
   1 -15 -14   13.41    5.38
   1 -15 -14   25.56    3.98
   1 -15 -13    4.98    2.30
   1 -15 -13    4.70    4.72
   1 -15 -13    3.17    2.73
   1 -15 -12   13.58    2.74
   1 -15 -12   17.24    5.03
   1 -15 -12   14.26    3.11
   1 -15 -11   13.74    2.95
   1 -15 -11   12.24    2.72
   1 -15 -10    4.08    4.02
   1 -15 -10    1.36    2.25
   1 -15 -10    2.50    2.09
   1 -15  -9   51.96    3.82
   1 -15  -9   50.57    6.01
   1 -15  -9   52.13    4.08
   1 -15  -8    5.66    2.14
   1 -15  -8    2.43    1.79
   1 -15  -8    5.13    3.41
   1 -15  -7   54.45    3.65
   1 -15  -7   50.44    3.72
   1 -15  -7   49.75    5.54
   1 -15  -6    7.83    3.38
   1 -15  -6    5.60    1.77
   1 -15  -6    6.33    1.91
   1 -15  -5  238.14    6.60
   1 -15  -5  244.31    6.83
   1 -15  -4  119.79    4.65
   1 -15  -4  120.94    6.54
   1 -15  -4  130.88    4.85
   1 -15  -3   43.50    4.15
   1 -15  -3   40.29    2.88
   1 -15  -3   37.24    2.70
   1 -15  -2   89.96    3.68
   1 -15  -2   90.93    3.92
   1 -15  -1    2.52    1.79
   1 -15  -1    2.11    1.22
   1 -15  -1    0.65    1.24
   1 -15   0  228.85    5.11
   1 -15   0  226.31    5.49
   1 -15   0  224.40    6.18
   1 -15   1   37.42    2.32
   1 -15   1   41.51    2.63
   1 -15   2  345.65    5.88
   1 -15   2  333.81    6.15
   1 -15   2  342.50    4.40
   1 -15   3    1.03    0.67
   1 -15   3    1.52    1.09
   1 -15   3    2.59    0.80
   1 -15   3    1.72    0.92
   1 -15   4  141.81    3.80
   1 -15   4  144.75    3.70
   1 -15   4  148.39    3.41
   1 -15   4  148.57    4.99
   1 -15   5   73.23    2.37
   1 -15   5   70.23    2.63
   1 -15   5   66.53    2.89
   1 -15   5   73.46    3.66
   1 -15   6  101.69    4.26
   1 -15   6   99.92    2.93
   1 -15   6  104.63    2.70
   1 -15   7  160.42    3.58
   1 -15   7  155.59    5.17
   1 -15   7  158.15    3.18
  -1  15  -8   11.64    3.11
   1 -15   8   12.86    1.19
   1 -15   8   13.61    1.98
  -1  15  -8   12.44    1.07
   1 -15   8   14.56    1.16
  -1  15  -9  268.04    4.21
   1 -15   9  277.48    4.30
   1 -15  10    1.24    0.70
   1 -15  10    1.51    1.37
   1 -15  11  615.48   10.61
   1 -15  11  653.59    6.08
   1 -15  12   62.14    1.94
   1 -15  12   48.50    3.39
   1 -15  13  132.15    5.07
   1 -15  14   98.79    4.53
   1 -15  15  139.53    5.29
   1 -15  16  678.43   11.21
   1 -15  17   35.96    2.93
   1 -15  18  222.15    6.47
   1 -15  19    6.76    1.84
  -1  15 -20   78.21   14.66
   1 -15  20   75.89    4.00
   1 -15  21   69.35    3.90
  -1  15 -21   42.97   11.82
  -1  15 -22   32.83   12.25
   1 -15  22   45.32    3.21
   1 -15  23   19.55    2.35
   1 -15  23   18.49    9.74
   1 -15  24   20.11    9.52
   1 -15  24   11.40    1.91
   1 -15  25    6.74    8.44
   1 -15  25    9.16    1.88
   1 -15  26   -0.55    1.46
   1 -15  26   10.40    9.02
   1 -15  27   61.89   12.09
   1 -15  27   72.34    3.92
   1 -15  28    2.78    1.68
   1 -15  28   -4.20    9.26
   1 -14 -16    0.66    4.97
   1 -14 -15    1.93    4.98
   1 -14 -15    3.51    2.90
   1 -14 -14    8.94    4.83
   1 -14 -14   10.54    3.31
   1 -14 -14    5.03    2.33
   1 -14 -13    6.34    2.93
   1 -14 -13    5.72    4.44
   1 -14 -13   10.61    2.79
   1 -14 -12   29.44    3.89
   1 -14 -12   31.82    5.83
   1 -14 -12   25.88    3.12
   1 -14 -11    1.01    2.14
   1 -14 -11   -0.81    2.32
   1 -14 -11    0.09    3.71
   1 -14 -10   10.80    2.39
   1 -14 -10   16.43    3.03
   1 -14 -10   19.99    4.80
   1 -14  -9   25.05    4.75
   1 -14  -9   25.11    3.19
   1 -14  -9   32.89    3.00
   1 -14  -8   22.16    2.67
   1 -14  -8   31.69    5.07
   1 -14  -8   28.87    3.12
   1 -14  -7   29.95    4.52
   1 -14  -7   34.52    3.12
   1 -14  -7   27.35    2.71
   1 -14  -6   36.10    4.42
   1 -14  -6   36.20    3.05
   1 -14  -6   29.68    2.67
   1 -14  -5   71.08    5.44
   1 -14  -5   73.38    3.74
   1 -14  -5   70.06    3.82
   1 -14  -4  111.64    4.43
   1 -14  -4  112.21    6.18
   1 -14  -4  119.64    4.50
   1 -14  -3  170.26    6.94
   1 -14  -3  162.60    5.03
   1 -14  -3  173.22    5.13
   1 -14  -2   55.29    4.02
   1 -14  -2   53.64    2.86
   1 -14  -2   61.22    3.12
   1 -14  -1  163.31    4.43
   1 -14  -1  170.73    5.95
   1 -14  -1  160.17    4.61
   1 -14   0  140.85    4.78
   1 -14   0  139.91    3.88
   1 -14   0  133.61    4.09
   1 -14   1    0.66    0.56
   1 -14   1    0.44    1.07
   1 -14   1    1.12    1.24
   1 -14   1    2.20    1.02
   1 -14   2  240.83    5.02
   1 -14   2  246.35    4.82
   1 -14   2  256.47    4.66
   1 -14   2  243.87    3.65
   1 -14   3   82.18    2.24
   1 -14   3   84.91    3.01
   1 -14   3   84.25    2.49
   1 -14   4  380.46    5.15
   1 -14   4  373.66    5.78
   1 -14   4  379.69    5.91
   1 -14   5    3.02    0.94
   1 -14   5    1.36    1.46
   1 -14   5    2.16    0.82
  -1  14  -5    2.47    0.78
   1 -14   6  449.05    5.29
   1 -14   6  437.60    5.76
   1 -14   7   92.73    3.95
  -1  14  -7   97.96    5.58
  -1  14  -7  105.73    2.55
   1 -14   7   99.91    2.72
   1 -14   7  102.07    2.47
  -1  14  -8  311.43    4.40
   1 -14   8  317.99    4.55
   1 -14   8  308.34    4.27
   1 -14   8  320.40    7.27
   1 -14   9   92.48    4.04
   1 -14   9   96.91    2.44
   1 -14  10    3.23    0.81
   1 -14  10    3.00    1.72
  -1  14 -11  382.80    5.54
   1 -14  11  386.28    8.15
   1 -14  12   18.15    2.37
   1 -14  13  269.90    6.97
   1 -14  13  288.67    3.86
   1 -14  14   90.07    2.46
   1 -14  14   91.41    4.24
   1 -14  15    2.45    0.88
   1 -14  15    2.27    1.45
   1 -14  16  161.72    3.81
   1 -14  16  163.83    5.44
   1 -14  17    5.53    1.87
   1 -14  17   10.04    1.43
   1 -14  18   14.71    1.65
   1 -14  18   20.96    2.50
   1 -14  19   50.57    3.22
   1 -14  19   54.31    2.70
   1 -14  20   69.47    3.33
  -1  14 -20   59.65   12.00
   1 -14  20   72.31    3.81
   1 -14  21    6.36    1.76
  -1  14 -21    0.60    8.51
   1 -14  21    9.71    1.61
   1 -14  22   53.51    3.30
   1 -14  22    4.66    1.98
   1 -14  23   -3.11    7.96
   1 -14  23    0.25    1.43
   1 -14  24   28.53    2.56
   1 -14  24   54.57   11.06
   1 -14  25    3.08    1.52
   1 -14  25    8.39    8.92
   1 -14  26   -6.90    8.78
   1 -14  26    0.91    1.47
   1 -14  27    3.52    1.65
   1 -14  27    2.10    8.18
   1 -14  28    1.69    8.33
   1 -14  28    3.18    1.69
   1 -13 -16   14.92    3.65
   1 -13 -16   11.40    5.53
   1 -13 -15   -1.66    2.38
   1 -13 -15   -2.95    2.91
   1 -13 -15    0.88    4.77
   1 -13 -14   14.68    2.92
   1 -13 -14    8.47    4.96
   1 -13 -14   11.76    3.21
   1 -13 -13    8.01    2.48
   1 -13 -13   -2.16    2.65
   1 -13 -13    6.19    4.64
   1 -13 -12   10.48    2.97
   1 -13 -12   13.72    4.64
   1 -13 -12    9.36    2.49
   1 -13 -11   33.90    3.75
   1 -13 -11   36.70    5.63
   1 -13 -11   32.21    3.21
   1 -13 -10   36.89    3.83
   1 -13 -10   36.86    5.58
   1 -13 -10   41.86    3.52
   1 -13  -9   34.61    3.43
   1 -13  -9   32.14    2.87
   1 -13  -9   28.66    4.53
   1 -13  -8    0.77    1.58
   1 -13  -8    1.37    3.19
   1 -13  -8    2.96    1.90
   1 -13  -7   63.96    4.00
   1 -13  -7   69.44    3.89
   1 -13  -7   77.92    6.40
   1 -13  -6   26.69    2.54
   1 -13  -6   27.89    2.66
   1 -13  -6   28.66    4.05
   1 -13  -5  234.70    9.00
   1 -13  -5  235.54    6.09
   1 -13  -5  243.18    6.54
   1 -13  -4   84.67    3.69
   1 -13  -4   93.03    3.92
   1 -13  -4   92.10    5.58
   1 -13  -3  147.97    6.47
   1 -13  -3  150.11    4.63
   1 -13  -3  154.86    4.67
   1 -13  -2  155.06    5.99
   1 -13  -2  163.52    4.56
   1 -13  -2  163.10    4.65
   1 -13  -1   68.53    2.86
   1 -13  -1   61.15    2.87
   1 -13  -1   57.14    1.65
   1 -13  -1   62.92    3.82
   1 -13   0  233.91    5.05
   1 -13   0  235.57    6.01
   1 -13   0  236.92    2.99
   1 -13   1   36.09    2.35
   1 -13   1   32.69    1.25
   1 -13   1   30.74    1.97
   1 -13   1   37.12    1.94
   1 -13   2  100.78    3.05
   1 -13   2   99.71    2.37
   1 -13   2   99.95    2.85
   1 -13   2  101.96    3.13
   1 -13   3   31.79    1.66
   1 -13   3   28.87    1.16
   1 -13   3   30.18    1.78
   1 -13   3   31.03    1.65
   1 -13   3   32.01    1.37
   1 -13   4  172.63    3.74
   1 -13   4  174.65    3.37
   1 -13   4  173.47    4.87
  -1  13  -5    7.97    1.05
   1 -13   5   10.48    1.18
   1 -13   5   11.04    1.96
   1 -13   5    9.10    1.03
   1 -13   6  247.22    6.00
   1 -13   6  243.37    3.74
   1 -13   6  246.09    4.07
   1 -13   7   80.51    2.12
   1 -13   7   75.66    3.38
  -1  13  -7   82.05    2.19
  -1  13  -7   79.31    4.91
   1 -13   7   86.70    2.33
   1 -13   8  130.68    4.58
   1 -13   8  140.96    2.82
   1 -13   9  524.33    5.13
   1 -13   9  488.78    8.67
   1 -13  10   21.79    2.21
  -1  13 -10   12.88    0.95
   1 -13  11  414.49    8.12
   1 -13  11  405.27    3.91
   1 -13  12   15.01    1.08
   1 -13  12   16.67    2.25
   1 -13  13  399.72    4.94
   1 -13  13  375.97    7.93
   1 -13  14  193.15    5.75
   1 -13  14  210.52    3.98
   1 -13  15  103.82    3.04
   1 -13  15   98.76    4.22
   1 -13  16   96.57    4.15
   1 -13  16  105.16    3.25
   1 -13  17   22.46    2.30
   1 -13  17   24.87    1.83
   1 -13  18  106.53    4.35
   1 -13  18  111.74    3.76
  -1  13 -18  102.66   13.89
   1 -13  19    7.49    1.43
   1 -13  19    6.51    1.71
   1 -13  20  180.04    5.65
   1 -13  20  183.55    5.21
  -1  13 -20  171.69   18.16
   1 -13  21   27.05    2.45
   1 -13  21   32.90    2.67
  -1  13 -21   29.96   10.87
   1 -13  22   41.30    2.99
   1 -13  22   40.35    2.81
   1 -13  22   45.58   10.04
   1 -13  23   67.63    3.51
   1 -13  23   59.11   11.33
   1 -13  23   60.15    3.49
   1 -13  24   12.82    2.00
   1 -13  24   16.13    9.60
   1 -13  24    8.25    1.85
   1 -13  25   45.31   10.41
   1 -13  25   42.34    3.05
   1 -13  26    1.75    7.58
   1 -13  26    5.13    1.65
   1 -13  27   43.73    3.19
  -1  13 -27   53.22    7.78
   1 -13  27   55.58   10.91
   1 -13  28    1.92    1.51
   1 -13  28    9.97    8.58
   1 -12 -17    4.86    3.15
   1 -12 -17    9.61    6.08
   1 -12 -16   11.32    2.64
   1 -12 -16   14.24    5.87
   1 -12 -16    2.65    2.84
   1 -12 -15    3.91    4.85
   1 -12 -15    0.23    2.11
   1 -12 -15   -0.02    2.85
   1 -12 -14   39.32    6.17
   1 -12 -14   54.27    5.00
   1 -12 -14   46.88    4.00
   1 -12 -13    1.44    2.55
   1 -12 -13    2.80    2.15
   1 -12 -13   -0.26    3.94
   1 -12 -12   69.60    5.16
   1 -12 -12   58.97    4.01
   1 -12 -12   67.14    7.30
   1 -12 -11   12.94    2.90
   1 -12 -11   13.99    2.51
   1 -12 -11   13.87    4.59
   1 -12 -10    9.49    3.98
   1 -12 -10   17.09    3.19
   1 -12 -10   11.58    2.18
   1 -12  -9   98.03    4.45
   1 -12  -9   95.02    5.18
   1 -12  -9   89.82    6.92
   1 -12  -8   64.55    5.95
   1 -12  -8   53.74    3.39
   1 -12  -8   60.16    4.00
   1 -12  -7  177.42    5.55
   1 -12  -7  180.15    6.30
   1 -12  -7  171.19    8.44
   1 -12  -6    5.83    2.71
   1 -12  -6    5.45    1.57
   1 -12  -6    6.61    1.75
   1 -12  -5   48.13    3.06
   1 -12  -5   42.26    4.07
   1 -12  -5   50.22    2.95
   1 -12  -4   65.13    3.30
   1 -12  -4   64.25    3.10
   1 -12  -4   58.82    4.61
   1 -12  -3  116.88    5.57
   1 -12  -3  131.13    4.19
   1 -12  -3  127.19    4.11
   1 -12  -2    1.67    1.19
   1 -12  -2    5.32    1.28
   1 -12  -2    1.19    1.85
   1 -12  -2    2.32    0.78
   1 -12  -1  111.34    4.63
   1 -12  -1  107.58    3.49
   1 -12  -1  107.06    3.41
   1 -12   0   81.21    1.69
   1 -12   0   87.46    3.63
   1 -12   0   83.40    2.83
   1 -12   0   81.55    2.98
   1 -12   1    9.75    0.79
   1 -12   1    9.85    1.26
   1 -12   1   10.45    1.20
   1 -12   1   11.25    1.51
   1 -12   2  332.89    4.86
   1 -12   2  328.45    4.25
   1 -12   2  339.71    5.37
   1 -12   2  342.81    5.20
   1 -12   3  109.78    2.99
   1 -12   3  118.41    2.84
   1 -12   3   97.66    1.89
   1 -12   3  107.28    2.28
   1 -12   3  119.48    3.18
   1 -12   3  126.25    4.18
   1 -12   4  622.97    6.05
  -1  12  -4  619.15    5.57
   1 -12   4  627.14    6.60
   1 -12   5  117.77    2.63
   1 -12   5  123.07    2.90
   1 -12   6  698.00    9.51
   1 -12   6  719.31    6.15
  -1  12  -6  714.06    5.94
  -1  12  -6  720.96   13.13
   1 -12   7  395.74    4.59
  -1  12  -7  394.97   10.23
   1 -12   7  391.55    4.48
   1 -12   8  619.19    5.40
   1 -12   8  586.34    9.07
  -1  12  -9  280.59    3.48
   1 -12   9  264.05    2.54
   1 -12  10    6.09    1.38
   1 -12  10    6.26    0.68
   1 -12  11  372.78    7.54
   1 -12  11  396.41    4.50
   1 -12  12   28.43    1.59
   1 -12  12   21.38    2.34
   1 -12  13  339.25    4.97
   1 -12  13  303.77    6.83
   1 -12  14   34.50    2.60
   1 -12  14   35.73    1.95
   1 -12  15  106.54    4.27
   1 -12  15  103.31    3.26
   1 -12  16   31.26    2.51
   1 -12  16   31.00    2.07
   1 -12  17  108.39    3.64
   1 -12  17  100.94    4.14
   1 -12  18  148.70    4.92
   1 -12  18  159.18    4.55
   1 -12  19    7.51    1.66
   1 -12  19    6.38    1.46
   1 -12  20   58.77    3.25
   1 -12  20   55.13    3.13
   1 -12  21    0.25    1.32
   1 -12  21    1.07    1.37
   1 -12  21   -2.13    7.58
   1 -12  22   47.18    2.96
   1 -12  22   33.14    9.15
   1 -12  22   34.35    2.99
   1 -12  23    0.63    1.53
   1 -12  23    7.66    7.64
   1 -12  23    0.34    1.36
   1 -12  24  138.06    5.45
   1 -12  24  134.83    4.85
   1 -12  24  124.43   13.95
   1 -12  25    7.20    2.04
   1 -12  25    8.77    1.69
   1 -12  26   -1.45    7.14
   1 -12  26   -0.88    1.50
   1 -12  27    0.24    1.45
   1 -12  27   -0.30    6.94
   1 -12  28    1.57    7.69
  -1  12 -28   -2.93    5.31
   1 -12  28    0.33    1.41
   1 -11 -18   12.94    5.81
   1 -11 -17    7.50    3.21
   1 -11 -17   13.11    5.69
   1 -11 -16    5.82    4.85
   1 -11 -16    5.43    2.39
   1 -11 -16    7.47    3.49
   1 -11 -15   11.06    2.70
   1 -11 -15    3.79    4.38
   1 -11 -15    3.36    3.06
   1 -11 -14    3.38    2.79
   1 -11 -14    9.39    2.48
   1 -11 -14    3.66    4.04
   1 -11 -13    3.84    4.20
   1 -11 -13    7.69    3.03
   1 -11 -13    7.53    2.29
   1 -11 -12   18.25    2.68
   1 -11 -12   21.83    3.49
   1 -11 -11    0.74    2.14
   1 -11 -11    2.55    3.49
   1 -11 -11    2.45    1.80
   1 -11 -10   32.46    5.03
   1 -11 -10   30.49    3.41
   1 -11 -10   32.38    2.77
   1 -11  -9    3.89    1.66
   1 -11  -9   -0.19    3.29
   1 -11  -9    6.15    2.19
   1 -11  -8    1.09    1.46
   1 -11  -8    1.36    2.83
   1 -11  -8    0.52    1.82
   1 -11  -7   32.98    4.40
   1 -11  -7   34.46    3.09
   1 -11  -7   31.78    2.54
   1 -11  -6   15.04    1.91
   1 -11  -6   17.01    2.19
   1 -11  -6   18.44    3.44
   1 -11  -5  115.14    4.37
   1 -11  -5  108.01    3.93
   1 -11  -5  103.86    5.88
   1 -11  -4    3.28    1.31
   1 -11  -4    1.69    2.09
   1 -11  -4    5.76    1.37
   1 -11  -3  257.14    7.81
   1 -11  -3  242.31    5.35
   1 -11  -3  251.39    5.57
   1 -11  -2    6.75    1.90
   1 -11  -2    7.89    1.33
   1 -11  -2    6.42    0.86
   1 -11  -2    8.08    1.39
   1 -11  -1  303.55    5.42
   1 -11  -1  296.96    5.40
   1 -11  -1  294.68    7.09
   1 -11   0  228.26    4.40
   1 -11   0  225.52    5.45
   1 -11   0  221.80    4.48
   1 -11   1   42.95    1.33
   1 -11   1   42.84    1.99
   1 -11   1   39.05    2.16
   1 -11   1   45.65    1.97
   1 -11   2  658.08    6.11
   1 -11   2  670.70    7.06
   1 -11   2  647.30    5.26
   1 -11   2  641.09    6.76
   1 -11   2  656.78    6.48
   1 -11   3   30.12    2.01
   1 -11   3   26.05    1.09
   1 -11   3   31.84    1.51
   1 -11   3   29.19    1.58
   1 -11   3   28.59    0.96
   1 -11   4  355.57    6.34
   1 -11   4  356.54    4.68
   1 -11   4  359.58    4.43
   1 -11   5  286.14    3.96
   1 -11   5  278.92    3.75
   1 -11   5  276.24    5.73
  -1  11  -6  258.98    7.71
   1 -11   6  258.68    5.61
   1 -11   6  267.00    3.57
   1 -11   6  274.24    3.68
   1 -11   7  432.97    4.61
   1 -11   7  438.43    4.39
   1 -11   8  101.23    3.77
  -1  11  -8   95.81    1.93
   1 -11   9   32.97    1.15
  -1  11  -9   34.82    1.54
   1 -11  10  181.11    5.09
   1 -11  10  200.93    3.04
   1 -11  11  207.56    5.45
   1 -11  11  215.07    3.52
   1 -11  12   13.43    1.85
   1 -11  12   13.95    1.21
   1 -11  13  325.00    5.08
   1 -11  13  309.74    6.71
   1 -11  14    1.16    0.91
   1 -11  14    1.45    1.24
   1 -11  15   69.01    3.35
   1 -11  15   75.68    2.98
   1 -11  16    5.20    1.21
   1 -11  16    4.83    1.48
   1 -11  17    2.02    1.20
  -1  11 -17    8.07    7.96
   1 -11  17    1.00    1.33
   1 -11  18  122.39    4.18
   1 -11  18  128.05    4.43
   1 -11  19    3.02    1.46
   1 -11  19    2.25    1.27
   1 -11  20  113.18    4.30
   1 -11  20  107.82    4.10
   1 -11  21    3.19    1.33
   1 -11  21    1.63    1.30
   1 -11  21    0.23    6.65
   1 -11  22   22.80    2.19
   1 -11  22   15.14    2.17
   1 -11  23   28.87    2.81
   1 -11  23   30.59    2.47
   1 -11  23   27.53    8.65
   1 -11  24   14.10    7.55
   1 -11  24   20.26    2.56
   1 -11  24   18.95    2.12
   1 -11  25   41.54    2.93
   1 -11  25   52.27   10.03
   1 -11  25   44.50    3.34
   1 -11  26   17.04    7.84
   1 -11  26   21.13    2.22
   1 -11  27   17.15    2.28
   1 -11  27   14.33    7.85
   1 -11  28    2.78    1.68
  -1  11 -28    3.70    5.44
   1 -10 -18   12.43    3.81
   1 -10 -18   13.32    6.06
   1 -10 -17   13.65    4.00
   1 -10 -17    0.66    4.86
   1 -10 -16   22.08    4.20
   1 -10 -16   26.57    6.03
   1 -10 -16   15.90    2.75
   1 -10 -15   18.65    3.70
   1 -10 -15   12.99    2.45
   1 -10 -15   10.75    4.82
   1 -10 -14   88.89    4.80
   1 -10 -14   94.52    6.40
   1 -10 -13   11.25    2.31
   1 -10 -13    6.71    2.87
   1 -10 -13    8.77    4.47
   1 -10 -12   20.71    3.40
   1 -10 -12   22.94    2.64
   1 -10 -12   20.27    4.91
   1 -10 -11   33.17    3.02
   1 -10 -11   40.01    5.76
   1 -10 -11   32.45    3.71
   1 -10 -10    5.63    2.38
   1 -10 -10    4.85    1.81
   1 -10  -9   53.75    4.08
   1 -10  -9   44.56    2.95
   1 -10  -8  176.42    6.57
   1 -10  -8  168.84    5.20
   1 -10  -7   54.78    3.73
   1 -10  -7   56.33    3.10
   1 -10  -6   28.88    2.33
   1 -10  -6   22.30    2.41
   1 -10  -5   33.27    2.56
   1 -10  -5   31.24    2.19
   1 -10  -4    0.36    1.18
   1 -10  -4   -0.89    2.15
   1 -10  -4    0.82    1.14
   1 -10  -3  346.33    6.37
   1 -10  -3  346.99    8.88
   1 -10  -3  328.53    5.92
   1 -10  -2   12.76    1.39
   1 -10  -2   11.88    1.40
   1 -10  -2   10.47    0.93
   1 -10  -1  364.57    7.60
   1 -10  -1  354.95    5.57
   1 -10   0  266.63    4.51
   1 -10   0  253.54    2.64
   1 -10   0  257.19    5.65
   1 -10   0  258.29    4.58
   1 -10   1   98.90    3.09
   1 -10   1   93.58    1.95
   1 -10   1   95.00    2.56
   1 -10   1   95.24    2.73
   1 -10   2  629.76    6.07
   1 -10   2  643.25    6.09
   1 -10   2  652.63    4.81
   1 -10   2  643.76    6.23
   1 -10   3    2.67    0.37
   1 -10   3    4.97    1.17
  -1  10  -3    3.89    0.63
   1 -10   3    3.84    0.74
   1 -10   3    3.59    0.72
   1 -10   3    3.06    0.49
   1 -10   4 1000.38    7.26
   1 -10   4  989.59    6.91
  -1  10  -5  646.25    5.11
   1 -10   5  677.87    5.60
  -1  10  -5  662.95   11.43
   1 -10   5  646.82    8.27
   1 -10   5  665.73    5.57
  -1  10  -6   15.41    2.81
   1 -10   6   17.62    1.80
   1 -10   6   15.02    1.07
   1 -10   6   19.51    1.18
   1 -10   7   44.87    1.06
   1 -10   7   46.43    1.36
  -1  10  -7   46.51    1.37
   1 -10   8   97.03    1.81
   1 -10   8   97.76    3.62
   1 -10   9  357.46    6.85
   1 -10   9  366.53    4.08
   1 -10  10  116.48    2.58
   1 -10  10  119.91    4.09
   1 -10  11  204.14    3.66
   1 -10  11  203.42    5.35
   1 -10  12   22.76    1.62
   1 -10  12   18.84    2.35
   1 -10  13   52.75    2.82
   1 -10  13   56.45    2.28
   1 -10  14    5.60    1.17
   1 -10  14    6.37    1.58
   1 -10  15  242.41    5.81
   1 -10  15  259.19    5.34
   1 -10  16   17.05    1.81
   1 -10  16   23.42    2.02
   1 -10  17  149.89    4.52
   1 -10  17  151.96    4.68
   1 -10  18   76.16    3.48
   1 -10  18   77.21    3.41
   1 -10  19    6.38    1.59
   1 -10  19    9.32    1.62
   1 -10  20   10.22    1.67
   1 -10  20   11.52    1.81
   1 -10  21   -0.66    1.27
   1 -10  21    0.27    1.39
   1 -10  21    4.49    6.73
   1 -10  22   27.34    2.78
   1 -10  22   32.45    2.42
   1 -10  22   34.87    8.70
   1 -10  23    3.11    1.46
   1 -10  23    1.01    1.67
   1 -10  23   -2.86    6.80
   1 -10  24   52.11    3.72
   1 -10  24   47.96    9.37
   1 -10  24   58.08    3.33
   1 -10  25   -0.03    6.53
   1 -10  25    2.49    1.75
   1 -10  25    1.28    1.33
   1 -10  26    1.39    1.42
   1 -10  26   -1.16    1.76
   1 -10  27   -3.00    1.68
  -1  10 -28    2.43    5.35
   1  -9 -19   20.78    6.42
   1  -9 -19   18.07    4.56
   1  -9 -18   -1.12    3.16
   1  -9 -18    2.95    5.09
   1  -9 -17   11.79    5.33
   1  -9 -17   19.05    4.15
   1  -9 -16    8.64    4.80
   1  -9 -16   -1.94    2.89
   1  -9 -16    4.21    2.16
   1  -9 -15    0.67    2.66
   1  -9 -15   -0.82    1.86
   1  -9 -15   -5.24    5.03
   1  -9 -14   33.02    4.08
   1  -9 -14   27.10    2.99
   1  -9 -14   25.84    5.47
   1  -9 -13   23.43    2.75
   1  -9 -13   17.06    3.27
   1  -9 -13   14.88    4.94
   1  -9 -12   47.46    4.36
   1  -9 -12   46.02    3.31
   1  -9 -11    7.22    1.93
   1  -9 -11    3.61    2.31
   1  -9 -10   47.04    3.10
   1  -9 -10   48.93    4.05
   1  -9  -9   28.47    3.04
  -1   9   9   25.46    2.08
   1  -9  -9   25.06    2.32
   1  -9  -8   14.29    2.40
  -1   9   8   13.88    1.54
   1  -9  -8    9.47    1.77
   1  -9  -7    0.11    1.59
  -1   9   7    0.80    0.99
   1  -9  -7   -1.16    1.21
   1  -9  -6    5.83    1.80
  -1   9   6    6.38    0.50
   1  -9  -6    8.34    1.44
   1  -9  -5  345.60    7.26
   1  -9  -5  333.14    6.15
   1  -9  -4  384.39    7.13
   1  -9  -4  366.16    6.25
   1  -9  -3  301.34    7.97
   1  -9  -3  308.33    5.87
   1  -9  -3  306.11    5.47
   1  -9  -2  146.48    3.77
   1  -9  -2  145.18    3.64
   1  -9  -2  148.35    5.25
   1  -9  -1    3.05    1.37
   1  -9  -1    3.47    0.99
   1  -9  -1    4.63    0.93
   1  -9  -1    3.16    0.36
   1  -9   0  177.40    3.59
   1  -9   0  171.11    4.52
   1  -9   0  172.26    2.13
   1  -9   0  179.48    3.55
   1  -9   1  321.46    5.06
   1  -9   1  330.45    4.44
   1  -9   1  318.94    3.59
   1  -9   2  251.64    3.81
   1  -9   2  247.50    3.54
   1  -9   2  255.80    3.69
   1  -9   3  153.92    2.89
   1  -9   3  161.23    3.94
   1  -9   3  141.72    1.62
   1  -9   3  148.86    2.70
   1  -9   4  259.35    3.38
  -1   9  -4  264.70    3.09
   1  -9   4  262.09    3.42
   1  -9   5   41.66    1.42
   1  -9   5   42.07    2.22
  -1   9  -5   43.43    3.14
   1  -9   5   40.55    1.33
   1  -9   6  752.64    5.71
   1  -9   6  732.26    3.98
   1  -9   6  728.29    4.83
  -1   9  -6  744.43    4.76
   1  -9   7   48.44    1.27
  -1   9  -7   49.42    1.59
   1  -9   8    1.71    1.19
   1  -9   8    2.08    0.57
   1  -9   9    5.31    1.29
   1  -9   9    5.02    0.75
   1  -9  10  210.11    5.09
   1  -9  10  216.84    3.69
   1  -9  11  122.95    3.09
   1  -9  11  122.01    3.94
   1  -9  12  176.87    3.85
   1  -9  12  165.49    4.57
   1  -9  13  283.90    5.93
   1  -9  13  311.57    5.33
   1  -9  14    2.18    1.05
   1  -9  14   -0.87    1.22
   1  -9  15  230.29    5.14
  -1   9 -15  234.90   17.08
   1  -9  15  238.90    5.54
   1  -9  16   12.66    1.60
   1  -9  16   17.96    1.80
  -1   9 -17  141.74   14.38
   1  -9  17  165.84    4.67
   1  -9  17  153.77    4.63
   1  -9  18  117.17    4.31
   1  -9  18  110.85    3.89
   1  -9  19    4.45    1.57
   1  -9  19    7.56    1.34
   1  -9  19    7.31    6.72
   1  -9  20   62.84    3.06
   1  -9  20   67.30    3.70
   1  -9  20   55.24    9.52
   1  -9  21   -1.57    1.33
   1  -9  21    2.27    5.82
   1  -9  21    0.33    1.51
   1  -9  22    9.81    1.60
   1  -9  22   14.76    7.07
   1  -9  22    4.53    1.84
   1  -9  23    4.61    1.80
   1  -9  23    3.61    1.45
   1  -9  23   -0.42    6.15
   1  -9  24    3.30    6.24
   1  -9  24    4.45    2.00
   1  -9  24    5.36    1.66
   1  -9  25    3.21    1.36
   1  -9  25    1.92    6.02
   1  -9  25    5.17    1.99
   1  -9  26   19.61    2.39
   1  -9  26   13.44    2.65
   1  -9  27    2.08    1.51
   1  -8 -20    1.25    5.13
   1  -8 -19    9.97    3.80
   1  -8 -19    6.30    5.38
   1  -8 -18   12.29    3.93
   1  -8 -18   15.97    5.85
   1  -8 -17    7.15    3.27
   1  -8 -17    2.97    4.56
   1  -8 -16    6.02    2.10
   1  -8 -16    0.22    4.54
   1  -8 -16    4.10    2.83
   1  -8 -15   37.88    6.55
   1  -8 -15   35.28    4.56
   1  -8 -15   38.59    3.34
   1  -8 -14   37.82    4.34
   1  -8 -14   39.28    3.23
   1  -8 -13   99.79    5.99
   1  -8 -13   97.71    4.47
   1  -8 -12    5.83    2.59
   1  -8 -12    7.28    2.04
  -1   8  11   45.25    2.81
   1  -8 -11   53.24    4.36
   1  -8 -11   51.28    3.21
   1  -8 -10  117.55    5.84
   1  -8 -10  123.07    4.51
  -1   8  10  112.52    4.02
  -1   8   9   65.81    2.98
   1  -8  -9   62.93    4.24
   1  -8  -9   63.08    3.24
   1  -8  -8  309.66    6.45
   1  -8  -8  317.70    8.24
  -1   8   8  307.00    5.82
   1  -8  -7  318.94    7.75
   1  -8  -7  316.80    6.29
  -1   8   7  320.40    5.65
  -1   8   6  150.12    3.67
  -1   8   6  142.62    2.08
   1  -8  -6  144.28    4.99
   1  -8  -6  151.48    4.25
   1  -8  -5  208.94    5.69
  -1   8   5  202.35    4.03
   1  -8  -4   51.06    2.74
   1  -8  -4   50.69    2.36
   1  -8  -3  506.10    7.34
   1  -8  -3  499.54    6.59
   1  -8  -2   44.32    2.17
   1  -8  -2   40.79    2.95
   1  -8  -2   41.30    2.00
   1  -8  -1  579.05    6.51
   1  -8  -1  578.00    6.33
   1  -8   0   76.58    3.00
   1  -8   0   78.02    2.38
   1  -8   0   80.64    2.31
   1  -8   1  583.79    6.36
   1  -8   1  587.45    5.73
   1  -8   1  578.02    4.43
   1  -8   1  584.12    5.58
   1  -8   2   21.36    0.77
   1  -8   2   22.96    1.21
   1  -8   2   20.20    1.10
   1  -8   2   20.46    1.06
   1  -8   3   27.71    1.21
   1  -8   3   26.52    1.22
   1  -8   3   24.99    1.77
   1  -8   3   25.24    0.94
  -1   8  -4  101.10    4.20
   1  -8   4   99.21    2.99
   1  -8   4  101.43    1.95
  -1   8  -4   99.42    1.80
   1  -8   4   97.71    2.01
   1  -8   5  180.02    2.69
   1  -8   5  183.88    4.13
   1  -8   5  169.28    1.88
  -1   8  -5  190.18    5.85
   1  -8   5  181.56    2.37
  -1   8  -5  176.04    2.15
   1  -8   6  921.07    5.06
  -1   8  -6  937.81    5.97
   1  -8   7    7.44    0.89
  -1   8  -7    8.74    0.97
   1  -8   8  748.13    8.84
   1  -8   8  785.54    6.10
   1  -8   9  527.13    7.64
   1  -8   9  534.47    5.55
   1  -8  10  124.56    3.82
   1  -8  10  129.69    3.06
   1  -8  11  137.29    3.32
   1  -8  11  130.44    3.88
   1  -8  12   25.46    2.01
   1  -8  12   27.15    1.77
   1  -8  13  332.71    5.75
   1  -8  13  321.73    6.06
   1  -8  14    2.32    1.29
  -1   8 -14   -2.22    5.58
   1  -8  14    1.50    1.00
   1  -8  15  407.44    6.96
   1  -8  15  410.82    6.97
   1  -8  16   53.64    2.74
   1  -8  16   54.59    2.83
   1  -8  17   26.23    2.26
   1  -8  17   23.69    2.07
   1  -8  18   -0.63    1.14
   1  -8  18   -0.15    1.18
   1  -8  19   23.21    2.36
   1  -8  19   24.00    2.02
   1  -8  20   14.25    2.18
   1  -8  20   18.37    1.83
   1  -8  20   13.38    6.76
   1  -8  21   18.01    6.71
   1  -8  21   25.86    2.21
   1  -8  21   19.75    2.44
   1  -8  22  111.97    4.18
   1  -8  22  109.75   11.06
   1  -8  22  104.25    4.79
   1  -8  23    1.47    1.21
   1  -8  23   -2.29    5.89
   1  -8  23    0.86    1.64
   1  -8  24   10.68    2.33
   1  -8  24   17.64    2.10
   1  -8  24   22.74    7.11
   1  -8  25   -0.95    1.99
   1  -8  25    1.03    1.38
   1  -8  26    2.77    1.62
   1  -8  26    0.35    1.87
   1  -8  27    1.64    1.73
   1  -7 -20    6.14    3.60
   1  -7 -20    1.74    4.79
   1  -7 -19   14.83    5.77
   1  -7 -19    9.23    3.58
   1  -7 -18    1.40    4.92
   1  -7 -18    3.66    3.54
   1  -7 -17    1.97    2.91
   1  -7 -17   -1.33    4.53
   1  -7 -16    6.77    3.21
   1  -7 -16    7.49    4.55
   1  -7 -16    9.04    2.22
   1  -7 -15   22.70    2.61
   1  -7 -15   16.53    3.64
   1  -7 -14   42.40    4.72
   1  -7 -14   50.63    3.43
  -1   7  13    0.53    1.42
   1  -7 -13    0.35    1.58
   1  -7 -13   -3.20    2.91
   1  -7 -12  199.91    5.88
  -1   7  12  216.52    5.75
   1  -7 -12  213.23    8.26
   1  -7 -11    9.59    1.94
   1  -7 -11    7.48    2.58
  -1   7  11    6.30    1.55
   1  -7 -10  126.86    6.01
   1  -7 -10  118.36    4.27
  -1   7  10  124.39    4.05
   1  -7  -9    9.22    2.27
  -1   7   9    5.01    1.32
   1  -7  -9    6.32    1.49
   1  -7  -8    2.84    1.25
   1  -7  -8    6.91    2.08
  -1   7   8    4.56    1.22
  -1   7   7   40.13    2.18
   1  -7  -7   42.54    3.15
   1  -7  -6   55.92    2.60
  -1   7   6   64.52    2.45
   1  -7  -6   64.29    3.48
  -1   7   6   60.25    1.58
  -1   7   5  190.35    2.20
   1  -7  -5  189.01    4.37
  -1   7   5  196.38    3.86
  -1   7   4  454.58    5.43
   1  -7  -4  440.30    6.20
   1  -7  -3   33.46    2.07
   1  -7  -3   27.06    1.62
   1  -7  -2   59.88    2.17
   1  -7  -2   63.66    3.37
   1  -7  -2   54.95    2.29
   1  -7  -1  270.44    4.10
   1  -7  -1  258.50    5.61
   1  -7  -1  271.74    4.29
   1  -7   0    8.20    1.29
   1  -7   0    5.32    0.44
   1  -7   0    8.47    1.14
   1  -7   0    6.46    0.91
   1  -7   1  785.73    6.84
   1  -7   1  793.43    6.17
   1  -7   1  814.40    4.74
   1  -7   1  827.34    6.32
   1  -7   2    7.70    0.70
   1  -7   2    9.84    0.85
   1  -7   2   10.71    0.96
   1  -7   3 1159.12    5.10
   1  -7   3 1275.87    6.94
   1  -7   3 1230.40    6.41
  -1   7  -3 1111.86    5.89
   1  -7   3 1285.53    9.70
   1  -7   4  435.04    3.46
   1  -7   4  445.10    5.94
   1  -7   4  446.13    4.02
  -1   7  -4  443.31    8.09
  -1   7  -5 1360.75    6.55
   1  -7   5 1347.21    5.84
   1  -7   6  474.03    4.01
   1  -7   6  491.59    6.74
   1  -7   7    3.53    1.12
   1  -7   7    4.17    0.66
   1  -7   8  277.15    5.27
   1  -7   8  273.03    3.85
   1  -7   9   44.37    1.82
   1  -7   9   42.40    2.29
   1  -7  10  584.31    7.69
   1  -7  10  601.81    4.37
   1  -7  11  173.33    4.31
   1  -7  11  187.26    4.02
   1  -7  12    8.40    1.20
   1  -7  12    8.78    1.39
   1  -7  13  130.82    3.75
   1  -7  13  128.68    3.83
   1  -7  14    5.79    1.17
  -1   7 -14    4.01    5.47
   1  -7  14    6.74    1.25
   1  -7  15   46.74    2.64
   1  -7  15   48.79    2.52
   1  -7  16   16.05    1.67
   1  -7  16   17.37    1.86
   1  -7  17  169.69    4.47
   1  -7  17  163.26    5.00
   1  -7  18    9.05    1.65
   1  -7  18   12.21    1.52
   1  -7  19  123.64   10.97
   1  -7  19  129.91    4.93
   1  -7  19  134.44    4.18
   1  -7  20  116.86    4.88
   1  -7  20  114.88   10.69
   1  -7  20  120.73    4.12
   1  -7  21    6.40    5.94
   1  -7  21    6.14    1.89
   1  -7  21    3.49    1.39
   1  -7  22   36.27    3.22
   1  -7  22   39.60    7.58
   1  -7  22   42.43    2.73
   1  -7  23    6.28    1.48
   1  -7  23   12.28    2.44
   1  -7  24   26.23    6.78
   1  -7  24   22.09    2.22
   1  -7  24   16.82    2.68
   1  -7  25    4.60    1.60
   1  -7  25    5.12    2.14
   1  -7  26    1.04    1.44
   1  -7  26    3.90    2.08
   1  -7  27   19.93    2.56
   1  -6 -21    8.16    3.79
   1  -6 -21   16.24    6.53
   1  -6 -20    0.66    5.16
   1  -6 -20   -0.75    3.24
   1  -6 -19   35.18    5.17
   1  -6 -19   30.10    6.38
   1  -6 -18    9.76    5.06
   1  -6 -18   -2.83    3.31
   1  -6 -17   47.79    5.18
   1  -6 -17   51.48    6.99
   1  -6 -16   34.44    4.61
   1  -6 -15    4.52    1.97
   1  -6 -15    1.91    2.71
  -1   6  14   10.28    1.89
   1  -6 -14   10.17    3.16
   1  -6 -14    9.65    2.07
   1  -6 -13  161.40    5.29
  -1   6  13  163.09    5.12
   1  -6 -13  157.57    7.40
   1  -6 -12   79.93    3.73
   1  -6 -12   75.57    5.03
  -1   6  12   72.56    3.42
  -1   6  11   14.14    1.84
   1  -6 -11   16.45    1.95
   1  -6 -11   17.10    2.96
   1  -6 -10  183.82    5.08
   1  -6 -10  180.33    6.88
  -1   6  10  181.14    4.78
  -1   6   9   31.16    2.12
   1  -6  -9   32.13    3.32
   1  -6  -9   24.71    2.07
   1  -6  -8  601.57   11.06
   1  -6  -8  586.53    8.11
   1  -6  -7   64.99    2.80
  -1   6   7   62.35    2.62
   1  -6  -6  249.91    4.95
  -1   6   6  247.57    4.56
  -1   6   6  256.38    3.78
  -1   6   5  410.02    5.43
   1  -6  -5  414.40    6.08
  -1   6   5  411.40    3.75
  -1   6   4    0.43    0.25
   1  -6  -4    3.49    1.62
   1  -6  -4    2.05    1.15
  -1   6   4    2.88    0.86
  -1   6   3  993.37    7.08
   1  -6  -3 1001.33    9.80
   1  -6  -2   38.72    3.12
   1  -6  -2   32.87    2.19
   1  -6  -1 1327.62    8.40
   1  -6  -1 1305.55    8.75
   1  -6   0  704.69    7.22
   1  -6   0  728.18    5.78
   1  -6   0  745.21    4.86
   1  -6   0  693.21    3.84
   1  -6   0  726.82    5.87
   1  -6   1 1336.57    5.30
   1  -6   1 1321.77    7.28
   1  -6   2   99.48    1.71
  -1   6  -2  105.35    2.03
   1  -6   2  102.96    2.56
   1  -6   2  100.30    1.93
   1  -6   2  101.07    1.85
   1  -6   3 1996.01    7.10
   1  -6   3 1966.03    6.66
  -1   6  -3 2089.54   16.18
   1  -6   3 2095.52   11.70
  -1   6  -3 2004.70    7.22
   1  -6   3 2058.84    8.25
  -1   6  -3 1979.73    6.38
  -1   6  -4  517.65    3.84
   1  -6   4  501.26    4.01
   1  -6   4  510.15    3.16
   1  -6   4  509.25    6.11
   1  -6   4  511.10    3.53
  -1   6  -5    4.17    0.70
   1  -6   5    4.32    0.65
  -1   6  -6 1117.90    7.32
   1  -6   6 1122.85    6.68
   1  -6   7   14.12    1.20
   1  -6   7   10.46    1.41
   1  -6   8 1702.93   12.22
   1  -6   8 1722.66    6.22
   1  -6   9   26.07    1.59
   1  -6   9   23.99    1.84
   1  -6   9   28.22    1.03
   1  -6  10  214.60    4.58
   1  -6  10  225.58    4.25
   1  -6  11  240.91    4.72
   1  -6  11  248.72    4.95
   1  -6  12   61.08    2.64
   1  -6  12   63.77    2.63
  -1   6 -12   56.55    8.25
   1  -6  13  389.00    6.62
   1  -6  13  371.17    6.05
   1  -6  14    8.90    1.25
   1  -6  14   10.40    1.48
  -1   6 -14   15.75    7.08
   1  -6  15  149.95    4.53
   1  -6  15  148.90    3.95
   1  -6  16   18.81    1.71
   1  -6  16   25.25    6.72
   1  -6  16   23.07    2.24
   1  -6  17  152.83    4.20
   1  -6  17  148.87   11.41
   1  -6  17  161.49    5.10
   1  -6  18   10.29    1.84
   1  -6  18   11.75    6.06
   1  -6  18    7.29    1.34
   1  -6  19   49.97    2.76
   1  -6  19   44.38    3.27
   1  -6  20   33.27    2.37
   1  -6  20   28.29    2.74
   1  -6  21    7.42    5.38
   1  -6  21    4.69    1.87
   1  -6  21    5.72    1.48
   1  -6  22   42.05    3.39
   1  -6  22   47.61    2.92
   1  -6  23    1.98    1.43
   1  -6  23    2.78    1.77
   1  -6  24    8.42    2.38
   1  -6  24   17.51    2.27
   1  -6  25    2.80    1.73
   1  -6  25    1.07    1.82
   1  -6  26    2.33    1.71
   1  -6  26    3.87    2.02
   1  -5 -21   11.37    5.99
   1  -5 -21    7.01    3.95
   1  -5 -20    3.73    3.63
   1  -5 -20    0.11    4.69
   1  -5 -19   -5.19    3.66
   1  -5 -19    5.94    4.75
  -1   5  18    1.14    1.95
   1  -5 -18   -0.41    4.23
   1  -5 -18    3.27    3.07
  -1   5  17    2.80    1.71
   1  -5 -17    6.38    3.25
   1  -5 -16   18.98    4.06
  -1   5  16   18.95    2.52
   1  -5 -15   46.26    3.28
   1  -5 -15   45.80    4.60
  -1   5  15   41.86    3.19
  -1   5  15   40.40    3.19
   1  -5 -14   49.10    4.74
  -1   5  14   62.03    3.57
   1  -5 -14   53.10    3.25
  -1   5  14   49.15    3.15
   1  -5 -13  120.21    4.50
  -1   5  13  131.81    4.76
  -1   5  13  134.59    4.62
   1  -5 -12    0.61    2.22
  -1   5  12    0.79    1.27
   1  -5 -12    1.78    1.39
  -1   5  12   -1.44    1.15
  -1   5  11  197.96    5.29
   1  -5 -11  213.31    5.44
   1  -5 -11  210.23    7.55
  -1   5  11  218.72    5.59
   1  -5 -10  152.17    4.44
   1  -5 -10  143.89    6.04
  -1   5  10  144.75    4.28
  -1   5  10  131.90    4.26
   1  -5  -9    0.26    1.12
  -1   5   9    0.73    0.97
  -1   5   9    0.46    1.02
   1  -5  -9    0.50    1.79
   1  -5  -8  372.75    6.26
  -1   5   8  368.93    6.30
  -1   5   8  362.27    6.06
   1  -5  -8  367.79    8.61
   1  -5  -7  205.76    6.14
   1  -5  -7  202.90    4.44
   1  -5  -6   40.36    2.09
   1  -5  -6   37.71    2.86
  -1   5   6   37.48    1.91
  -1   5   6   33.78    2.06
  -1   5   5   17.54    1.40
  -1   5   5   19.98    1.32
  -1   5   4   11.11    1.29
   1  -5  -4   10.81    1.60
  -1   5   4    9.78    0.67
  -1   5   3  126.18    2.55
   1  -5  -3  132.58    2.93
   1  -5  -3  137.97    3.66
   1  -5  -2   44.66    1.94
   1  -5  -2   46.98    2.88
   1  -5  -1  890.46    6.46
   1  -5  -1  877.06    8.99
   1  -5  -1  880.37    6.75
   1  -5   0   85.96    1.52
   1  -5   0   83.57    1.93
   1  -5   0   87.17    1.89
  -1   5  -1  799.52    6.28
   1  -5   1  822.62    5.63
  -1   5  -1  813.26    5.04
   1  -5   1  816.77    5.00
  -1   5  -2  523.86    3.90
   1  -5   2  519.63    3.53
  -1   5  -2  526.98    4.16
   1  -5   2  515.04    3.57
   1  -5   2  508.61    3.92
   1  -5   2  508.19    5.20
   1  -5   3  900.49    4.54
   1  -5   3  920.08    3.99
   1  -5   3  893.07    5.10
   1  -5   3  865.39    7.06
  -1   5  -3  917.24    4.84
  -1   5  -3  880.37    5.35
   1  -5   4 1734.46   10.58
   1  -5   4 1712.05    6.99
   1  -5   5  467.70    4.12
   1  -5   5  477.24    5.85
  -1   5  -5  475.89    4.50
   1  -5   6 1084.57    6.98
   1  -5   6 1096.31    9.12
   1  -5   7    3.12    1.09
   1  -5   7    1.79    0.40
   1  -5   7    2.87    0.71
   1  -5   8  181.67    3.87
   1  -5   8  183.71    3.48
   1  -5   8  181.13    2.22
   1  -5   9   20.95    1.45
   1  -5   9   20.83    1.53
   1  -5  10  135.92    3.49
   1  -5  10  139.96    3.52
   1  -5  11  129.65    3.45
   1  -5  11  134.44    3.67
   1  -5  12  284.90    5.08
  -1   5 -12  278.12   15.93
   1  -5  12  300.59    5.72
   1  -5  13  143.71    3.68
   1  -5  13  151.61    4.33
   1  -5  14   -0.27    1.05
   1  -5  14    0.19    0.89
   1  -5  15   19.16    2.01
   1  -5  15   16.33    1.50
   1  -5  16    5.17    4.73
   1  -5  16    3.35    1.37
   1  -5  16    7.01    1.31
   1  -5  17  235.36    5.16
   1  -5  17  238.08    6.27
   1  -5  18   11.91    1.52
   1  -5  18    9.85    5.59
   1  -5  18   15.11    2.11
   1  -5  19    9.62    1.57
   1  -5  19   12.01    5.37
   1  -5  19    6.28    1.90
   1  -5  20   20.41    2.00
   1  -5  20   14.28    2.20
   1  -5  20   17.08    6.03
   1  -5  21   13.42    1.84
   1  -5  21   13.56    2.29
   1  -5  21    8.44    4.50
   1  -5  22   54.33    3.18
   1  -5  22   48.52    6.89
   1  -5  22   50.26    3.82
   1  -5  23   16.54    2.59
   1  -5  23   14.30    2.09
   1  -5  24   18.21    2.21
   1  -5  24    9.72    2.45
   1  -5  25   23.37    3.11
   1  -5  25   20.33    2.48
   1  -5  26    6.16    2.36
   1  -5  26    1.04    1.58
   1  -4 -22   17.13    4.71
   1  -4 -22   35.30    7.32
  -1   4  21    2.99    2.21
   1  -4 -21    5.31    3.52
   1  -4 -21   -0.76    5.07
   1  -4 -20   -3.19    3.42
  -1   4  20    2.04    1.96
   1  -4 -20    3.83    4.88
   1  -4 -19   33.46    6.48
   1  -4 -19   26.75    4.45
  -1   4  19   38.14    3.39
  -1   4  18   -0.09    1.62
   1  -4 -18   -4.51    3.21
  -1   4  17   97.33    4.67
   1  -4 -17   80.46    6.21
  -1   4  16    1.05    1.48
  -1   4  16    0.63    1.48
   1  -4 -16    3.69    2.77
  -1   4  15   90.27    4.14
  -1   4  15   77.23    3.92
   1  -4 -15   81.69    5.82
   1  -4 -14  100.36    4.14
   1  -4 -14  104.62    6.27
  -1   4  14  104.81    4.24
  -1   4  14  100.58    4.10
  -1   4  13   12.84    1.78
   1  -4 -13   14.93    1.93
   1  -4 -13   17.20    3.03
  -1   4  13   17.29    2.00
  -1   4  12   85.84    3.52
   1  -4 -12   81.09    5.10
  -1   4  12   75.65    3.56
   1  -4 -12   84.39    3.53
   1  -4 -11    1.13    2.10
   1  -4 -11   -0.88    1.26
  -1   4  11    1.53    1.19
  -1   4  11    1.24    1.14
  -1   4  10  157.30    4.33
  -1   4  10  143.76    4.34
   1  -4 -10  156.36    6.32
   1  -4 -10  161.60    4.42
   1  -4  -9   36.80    3.24
   1  -4  -9   35.96    2.25
  -1   4   9   37.00    2.19
  -1   4   9   34.64    2.06
  -1   4   8  632.43    7.77
   1  -4  -8  609.86    7.69
  -1   4   8  624.93    7.60
   1  -4  -8  627.68   10.92
   1  -4  -7   49.16    2.23
  -1   4   7   51.61    2.22
  -1   4   7   51.48    2.28
   1  -4  -7   51.80    3.32
   1  -4  -6  405.93    7.77
   1  -4  -6  393.30    5.57
  -1   4   6  385.76    5.47
  -1   4   6  391.79    5.39
  -1   4   6  384.69    8.30
  -1   4   5  117.86    4.05
   1  -4  -5  119.13    3.05
  -1   4   5  122.46    2.93
   1  -4  -5  118.71    4.16
   1  -4  -4  951.84    7.71
  -1   4   4  910.09    6.93
   1  -4  -4  970.12   10.36
  -1   4   4  905.60    7.85
  -1   4   3 1477.88    7.96
   1  -4  -3 1466.89    8.93
   1  -4  -3 1479.39   10.89
   1  -4  -2  183.04    3.57
   1  -4  -2  169.15    4.53
   1  -4  -1  656.63    7.24
   1  -4  -1  654.21    4.40
   1  -4  -1  651.00    5.05
   1  -4  -1  661.90    5.44
  -1   4   0  448.02    3.78
   1  -4   0  442.25    4.81
   1  -4   0  450.96    3.75
   1  -4   0  449.15    3.94
  -1   4   0  442.23    5.21
   1  -4   1  645.86    4.45
   1  -4   1  654.48    4.35
  -1   4  -1  651.50    4.88
  -1   4  -1  654.06    4.44
  -1   4  -1  663.83    3.89
   1  -4   1  647.01    3.85
   1  -4   2 1981.34    7.14
   1  -4   2 2044.56    5.66
   1  -4   2 1999.56    9.71
   1  -4   2 2043.21    6.82
  -1   4  -2 2081.54   13.66
  -1   4  -2 2055.76    7.04
  -1   4  -2 2023.88    7.51
  -1   4  -2 2026.55    5.55
   1  -4   3    2.03    0.43
   1  -4   3    1.84    0.47
   1  -4   3    2.55    0.80
  -1   4  -3    2.39    0.56
  -1   4  -3    2.82    0.50
   1  -4   4 1126.08    6.07
   1  -4   4 1113.02    8.08
   1  -4   5  122.42    2.30
   1  -4   5  113.58    2.78
   1  -4   6 1439.27    4.92
   1  -4   6 1448.60    9.78
   1  -4   7    9.94    0.67
   1  -4   7    8.87    1.13
   1  -4   8  234.66    4.11
   1  -4   8  234.34    4.14
   1  -4   8  232.78    2.77
   1  -4   9   12.01    1.26
   1  -4   9   14.47    1.37
   1  -4  10  163.38    3.90
   1  -4  10  167.94    3.67
   1  -4  11  136.78    3.86
  -1   4 -11  133.43   10.84
   1  -4  11  135.19    3.30
   1  -4  12  403.54    6.80
   1  -4  12  399.85    5.75
   1  -4  13   41.93    2.06
   1  -4  13   42.28    2.53
   1  -4  14   76.66    3.40
   1  -4  14   75.51    2.74
   1  -4  14   77.47    7.81
   1  -4  15   54.63    3.02
   1  -4  15   63.71    2.60
   1  -4  15   58.26    7.16
   1  -4  16    6.16    1.22
   1  -4  16   11.34    5.05
   1  -4  16    6.65    1.63
   1  -4  17  111.04    4.53
   1  -4  17  117.66    9.27
   1  -4  17  115.36    3.70
   1  -4  18    0.54    4.20
   1  -4  18    1.38    1.49
   1  -4  18    0.16    1.06
   1  -4  19   27.67    2.80
   1  -4  19   29.06    5.96
   1  -4  19   31.46    2.29
   1  -4  20    5.71    2.00
   1  -4  20    2.64    1.33
   1  -4  21    7.96    1.60
   1  -4  21   13.90    4.72
   1  -4  21    8.77    2.03
   1  -4  22   30.34    3.07
   1  -4  22   36.41    2.71
   1  -4  23    0.16    1.45
   1  -4  23   -2.93    1.92
   1  -4  24    3.40    1.94
   1  -4  24   11.72    1.95
   1  -4  25   33.03    3.47
   1  -4  25   32.27    3.02
   1  -4  26    5.80    2.09
  -1   3  23   11.53    2.66
   1  -3 -22   12.02    4.33
   1  -3 -22   10.27    5.50
  -1   3  22    9.95    2.43
  -1   3  21   40.60    3.59
   1  -3 -21   42.59    6.90
   1  -3 -21   40.70    5.40
   1  -3 -20   10.86    3.42
  -1   3  20   13.81    2.47
   1  -3 -20    9.03    5.10
  -1   3  19    5.82    2.11
   1  -3 -19    9.74    3.50
  -1   3  18    0.54    1.59
   1  -3 -18   -0.63    2.92
  -1   3  17    2.16    1.67
  -1   3  17    0.40    1.62
  -1   3  16   31.49    2.62
  -1   3  16   31.92    2.75
   1  -3 -16   31.83    4.35
  -1   3  15   93.07    3.95
   1  -3 -15   97.35    6.17
  -1   3  15  100.69    4.22
  -1   3  14   -1.25    1.31
  -1   3  14   -0.70    1.29
   1  -3 -14    0.87    2.39
   1  -3 -13    1.85    2.47
  -1   3  13    3.25    1.56
   1  -3 -13    4.96    1.53
  -1   3  13    3.55    1.26
  -1   3  12    6.06    1.19
   1  -3 -12    5.73    1.50
  -1   3  12    3.14    1.35
   1  -3 -11   -0.45    2.24
  -1   3  11   -0.31    0.94
   1  -3 -11    0.00    1.16
  -1   3  11   -0.44    1.13
   1  -3 -10   87.60    3.25
  -1   3  10   86.92    3.25
  -1   3  10   87.93    3.00
   1  -3 -10   93.49    5.00
   1  -3  -9    2.91    1.19
  -1   3   9    5.38    1.21
  -1   3   9    4.40    0.97
   1  -3  -9    6.74    2.10
   1  -3  -8  437.60    6.27
  -1   3   8  433.81    5.92
   1  -3  -8  441.83    9.04
   1  -3  -7   14.90    1.43
  -1   3   7   14.35    1.21
   1  -3  -7   13.79    2.23
  -1   3   7   14.53    1.34
  -1   3   6  174.18    3.49
  -1   3   6  174.89    3.45
   1  -3  -6  172.06    3.57
   1  -3  -6  176.57    5.05
  -1   3   5  264.75    4.04
   1  -3  -5  277.42    5.84
  -1   3   5  270.63    4.00
   1  -3  -5  263.95    4.12
  -1   3   4   50.31    3.27
  -1   3   4   56.56    1.76
   1  -3  -4   52.92    1.80
  -1   3   3 2111.99    8.92
   1  -3  -3 2156.32   12.66
   1  -3  -2   57.93    1.62
   1  -3  -2   55.18    1.84
   1  -3  -2   53.61    2.57
  -1   3   1  105.03    1.86
  -1   3   1   87.71    2.79
   1  -3  -1   99.95    1.86
   1  -3  -1  106.31    2.08
   1  -3  -1   96.00    2.68
  -1   3   1  112.31    2.36
   1  -3   0   25.15    1.28
  -1   3   0   34.60    1.31
   1  -3   0   19.30    0.82
  -1   3   0   23.30    1.38
  -1   3   0   18.46    0.76
   1  -3   0   31.72    1.17
   1  -3   1  214.23    1.85
   1  -3   1  211.75    2.23
  -1   3  -1  211.42    2.43
   1  -3   1  209.34    2.29
  -1   3  -1  215.30    1.82
   1  -3   1  212.88    2.72
  -1   3  -1  211.82    2.29
   1  -3   2   74.45    1.33
   1  -3   2   74.18    1.82
   1  -3   2   75.26    1.40
  -1   3  -2   73.63    1.80
  -1   3  -2   78.72    1.40
  -1   3  -2   76.63    1.46
   1  -3   3  860.19    6.31
  -1   3  -3  868.25    4.79
   1  -3   3  849.33    5.03
   1  -3   4  282.41    3.87
   1  -3   4  280.85    3.26
  -1   3  -4  290.09    3.56
   1  -3   5  399.86    4.32
   1  -3   5  411.18    4.74
   1  -3   6  220.83    3.64
   1  -3   6  224.58    3.60
   1  -3   7    1.43    0.47
   1  -3   7    1.90    0.79
   1  -3   7    1.50    0.75
   1  -3   8  199.72    3.91
   1  -3   8  205.72    3.69
   1  -3   9  106.00    2.74
   1  -3   9  111.90    3.14
  -1   3 -10  526.29   19.17
   1  -3  10  509.23    5.94
   1  -3  10  514.58    7.05
   1  -3  11  185.17    3.76
   1  -3  11  193.86    4.62
   1  -3  12  314.48    6.11
   1  -3  12  297.72   12.26
   1  -3  13   73.57    3.27
   1  -3  13   72.18    2.54
   1  -3  13   69.63    6.86
   1  -3  14   -2.89    4.11
   1  -3  14    1.34    1.25
   1  -3  14   -0.50    0.99
   1  -3  15   25.92    5.19
   1  -3  15   23.13    2.19
   1  -3  15   23.87    1.70
   1  -3  16    3.63    1.50
   1  -3  16    6.68    4.37
   1  -3  16    3.40    1.15
   1  -3  17  116.68    3.74
   1  -3  17  114.69    4.59
   1  -3  17  109.18    8.26
   1  -3  18   28.70    2.86
   1  -3  18   27.53    5.25
   1  -3  18   31.36    2.19
   1  -3  19   30.14    2.30
   1  -3  19   34.76    2.90
   1  -3  20   18.27    2.51
   1  -3  20   19.12    2.07
   1  -3  20   16.53    4.81
   1  -3  21    4.54    1.57
   1  -3  21    5.28    2.04
   1  -3  22    1.47    1.81
   1  -3  22    5.77    1.72
   1  -3  23    0.74    1.66
   1  -3  23    2.01    1.45
   1  -3  24   14.83    2.35
   1  -3  24   11.74    2.63
   1  -3  25   -1.59    1.60
   1  -3  25    1.50    1.95
  -1   2  24   11.18    2.71
  -1   2  23    4.20    2.31
   1  -2 -23    0.74    5.04
   1  -2 -23   -1.37    3.92
   1  -2 -22   22.58    4.73
  -1   2  22   25.04    3.13
   1  -2 -22   25.33    6.26
   1  -2 -21    2.44    3.71
  -1   2  21   -1.03    1.85
   1  -2 -21    2.10    4.16
  -1   2  20   11.99    2.31
   1  -2 -20   11.78    4.39
   1  -2 -19   35.27    4.97
  -1   2  19   39.54    3.18
  -1   2  18   30.18    2.66
  -1   2  18   29.59    2.77
   1  -2 -18   30.75    4.45
  -1   2  17  150.63    5.07
   1  -2 -17  147.13    7.92
  -1   2  17  150.59    5.39
  -1   2  16    1.93    1.36
  -1   2  16    1.47    1.43
   1  -2 -16    5.87    3.04
   1  -2 -15   62.94    5.19
  -1   2  15   61.10    3.63
  -1   2  15   72.20    3.30
   1  -2 -14    3.54    2.79
  -1   2  14    0.02    1.10
  -1   2  14    0.46    1.31
  -1   2  13  224.72    5.66
  -1   2  13  206.10    4.92
   1  -2 -13  206.88    8.02
   1  -2 -12  201.30    7.93
  -1   2  12  221.63    5.40
  -1   2  12  220.44    4.82
   1  -2 -12  208.67    5.14
  -1   2  11   15.44    1.37
   1  -2 -11   16.67    2.85
   1  -2 -11   15.29    1.64
  -1   2  11   16.24    1.72
   1  -2 -10  722.44    8.40
  -1   2  10  707.59    8.61
  -1   2  10  704.00    7.73
  -1   2   9    1.15    0.92
  -1   2   9    0.23    0.78
   1  -2  -9   -0.13    1.78
   1  -2  -9    2.54    1.17
   1  -2  -8  421.80    5.89
  -1   2   8  428.92    6.05
  -1   2   8  424.21    5.34
  -1   2   7  120.96    3.43
  -1   2   7  148.16    3.82
   1  -2  -7  153.07    3.75
   1  -2  -7  113.43    5.61
  -1   2   6  137.39    3.08
  -1   2   6  127.70    2.71
   1  -2  -6  135.19    4.48
   1  -2  -6  136.87    3.08
   1  -2  -5  436.46    5.04
   1  -2  -5  426.75    7.57
   1  -2  -4  956.04    6.95
   1  -2  -4  963.45    9.37
  -1   2   4  975.21    6.58
  -1   2   4  945.76    6.42
   1  -2  -3 2113.57    9.23
   1  -2  -3 2220.68   12.45
  -1   2   2  102.52    2.54
   1  -2  -2   87.05    1.63
   1  -2  -2   87.73    1.63
   1  -2  -2   99.23    2.23
   1  -2  -2   89.36    2.88
  -1   2   2   96.64    1.87
   1  -2  -2   97.31    1.84
   1  -2  -1  196.53    2.21
   1  -2  -1  188.59    2.40
  -1   2   1  196.69    2.24
  -1   2   1  189.75    2.51
  -1   2   1  194.50    3.43
   1  -2   0  543.38    4.14
   1  -2   0  559.01    3.07
  -1   2   0  554.94    4.39
   1  -2   0  536.29    3.42
  -1   2   0  547.81    3.49
  -1   2   0  558.60    3.04
   1  -2   1 2795.43    7.22
  -1   2  -1 2814.65    7.47
   1  -2   1 2671.59    8.58
   1  -2   1 2826.88    8.08
  -1   2  -1 2638.58   17.57
  -1   2  -1 2527.48    8.45
  -1   2  -1 2954.75    8.55
   1  -2   2  119.26    4.94
  -1   2  -2  132.02    2.30
   1  -2   2  126.37    1.59
   1  -2   2  124.91    1.84
  -1   2  -2  110.25    5.14
  -1   2  -2  125.42    1.94
  -1   2  -2  129.51    1.69
   1  -2   2  114.25    2.05
  -1   2  -3  611.72    5.29
   1  -2   3  621.53    4.55
   1  -2   4   14.26    0.52
  -1   2  -4   13.53    0.51
   1  -2   4   11.77    0.94
   1  -2   4   11.94    0.86
   1  -2   5   69.78    1.97
  -1   2  -5   65.98    1.24
   1  -2   5   73.12    1.98
   1  -2   5   70.53    1.33
   1  -2   6 1013.37    7.85
  -1   2  -6 1012.48    5.39
   1  -2   6 1027.55    5.66
   1  -2   7  691.05    6.10
   1  -2   7  695.95    7.01
  -1   2  -7  675.37    5.00
  -1   2  -8  395.04    4.23
   1  -2   8  393.20    5.65
   1  -2   8  397.83    4.78
  -1   2  -8  380.56   14.37
   1  -2   9  354.48    4.71
  -1   2  -9  347.86    4.33
   1  -2  10  116.52    2.85
  -1   2 -10  123.13    2.81
   1  -2  10  123.05    3.68
   1  -2  11  119.70    3.02
   1  -2  11  123.49    3.90
  -1   2 -11  118.61    2.92
   1  -2  11  117.57    7.57
  -1   2 -12  151.50    3.51
   1  -2  12  158.61    3.75
   1  -2  12  147.87    8.45
   1  -2  12  153.83    4.45
   1  -2  13   88.60    2.87
   1  -2  13   85.06    6.73
   1  -2  13   87.78    3.54
   1  -2  14  442.58    7.97
   1  -2  14  435.75    6.40
   1  -2  14  425.81   14.05
   1  -2  15   25.04    2.32
   1  -2  15   21.15    1.68
   1  -2  15   18.60    4.53
   1  -2  16   68.93    2.92
   1  -2  16   63.96    3.48
   1  -2  17   62.79    6.26
   1  -2  17   62.38    2.90
   1  -2  17   62.84    3.67
   1  -2  18    4.56    1.44
   1  -2  18    2.54    1.67
   1  -2  19  127.06    7.94
   1  -2  19  136.74    4.51
   1  -2  19  133.18    5.51
   1  -2  20    3.50    1.92
   1  -2  20    3.60    1.50
   1  -2  21   38.31    3.34
   1  -2  21   34.39    2.81
   1  -2  22    2.25    1.54
   1  -2  22   -0.26    1.84
   1  -2  23   13.60    2.59
   1  -2  23   10.27    2.22
   1  -2  24   11.41    2.20
   1  -2  24   10.06    2.67
   1  -2  25   15.45    2.76
   1  -2  25   11.41    2.21
  -1   1  24    0.85    2.01
   1  -1 -24    0.30    3.91
   1  -1 -24   -2.91    5.36
  -1   1  23    4.12    1.85
   1  -1 -23   11.82    6.28
   1  -1 -23    7.80    3.81
   1  -1 -22    2.78    3.58
  -1   1  22    6.57    1.99
   1  -1 -22    6.03    5.65
   1  -1 -21    8.14    3.50
  -1   1  21    4.27    1.78
   1  -1 -21   12.88    5.91
  -1   1  20    5.17    1.76
   1  -1 -20    3.04    3.60
   1  -1 -19    0.85    2.97
  -1   1  19    1.00    1.62
  -1   1  18    1.10    1.40
   1  -1 -18    3.05    2.84
  -1   1  18    1.75    1.44
  -1   1  17   46.92    3.33
   1  -1 -17   47.92    5.02
  -1   1  17   54.97    3.12
   1  -1 -16    3.37    2.88
  -1   1  16    2.50    1.31
  -1   1  16    1.23    1.29
   1  -1 -15   15.38    3.57
  -1   1  15   17.27    2.08
  -1   1  15   16.26    1.71
   1  -1 -14   43.00    4.28
  -1   1  14   38.30    2.62
  -1   1  14   36.58    2.21
  -1   1  13   40.00    2.71
  -1   1  13   42.67    2.24
  -1   1  12  100.29    3.11
  -1   1  12  100.78    3.71
  -1   1  11   50.38    2.53
  -1   1  11   45.07    2.05
  -1   1  10   43.39    1.96
  -1   1  10   43.39    2.28
   1  -1 -10   42.50    2.20
  -1   1   9  169.56    3.37
   1  -1  -9  162.44    3.73
  -1   1   8    3.18    0.86
  -1   1   8    3.72    1.02
   1  -1  -8    2.99    1.03
   1  -1  -7  296.66    4.46
  -1   1   7  302.51    4.57
  -1   1   7  290.70    3.86
   1  -1  -6    2.59    1.47
  -1   1   6    2.59    0.81
   1  -1  -6    3.75    0.85
  -1   1   6    4.24    0.68
  -1   1   5  673.11    5.09
  -1   1   5  686.54    5.83
  -1   1   4 2748.72   10.38
   1  -1  -4 2747.62   17.60
  -1   1   4 2710.14    9.13
   1  -1  -3 1034.51    7.81
   1  -1  -3 1100.99    6.11
   1  -1  -3 1133.39   10.35
  -1   1   3 1098.82    5.36
   1  -1  -3 1058.94    4.99
   1  -1  -2  398.51    2.84
   1  -1  -2  401.61    5.27
  -1   1   2  386.96    5.51
   1  -1  -2  400.57    4.02
   1  -1  -1  119.26    1.71
  -1   1   1   17.68    0.81
  -1   1   1   45.37    1.65
   1  -1  -1  120.68    2.32
  -1   1   0   -0.13    0.17
   1  -1   0   -0.20    0.37
  -1   1   0    0.05    0.24
   1  -1   0    0.58    0.26
  -1   1   0    0.00    0.13
  -1   1  -1   -0.23    0.26
  -1   1  -1    0.03    0.18
   1  -1   1   18.93    0.73
   1  -1   1   60.65    1.20
   1  -1   1   42.16    0.84
   1  -1   1    0.31    0.50
  -1   1  -1   -0.08    0.17
  -1   1  -1   73.74    2.51
   1  -1   2    2.74    1.62
  -1   1  -2    1.59    1.73
   1  -1   2    3.69    0.51
  -1   1  -2    3.65    0.56
  -1   1  -2    5.00    0.60
   1  -1   2    4.21    0.56
  -1   1  -3  140.76    2.46
  -1   1  -3  122.01    6.08
   1  -1   3  140.79    1.43
  -1   1  -3  143.05    2.52
  -1   1  -3  138.51    1.43
   1  -1   3  120.60    5.03
   1  -1   3  136.93    2.33
   1  -1   3  111.29    1.93
   1  -1   4    1.82    0.68
   1  -1   4    1.53    0.39
   1  -1   4    1.48    0.55
  -1   1  -4    1.23    0.39
  -1   1  -4    1.24    4.36
   1  -1   5    4.83    0.82
  -1   1  -5    3.50    0.58
  -1   1  -5    2.17    3.05
   1  -1   5    4.60    0.62
   1  -1   5    4.82    0.73
  -1   1  -6    0.88    0.54
  -1   1  -6    3.93    3.77
   1  -1   6    0.87    0.76
   1  -1   6    2.21    0.65
  -1   1  -7    3.67    0.67
   1  -1   7    4.26    0.75
   1  -1   7    3.98    0.97
   1  -1   8    1.63    0.65
   1  -1   8    1.04    0.84
  -1   1  -8    0.41    0.60
  -1   1  -9    4.80    0.82
   1  -1   9    5.15    0.84
   1  -1   9    8.10    3.44
   1  -1   9    4.77    1.13
  -1   1 -10  128.77    3.08
   1  -1  10  137.37    3.95
   1  -1  10  135.16    3.15
  -1   1 -11  181.97    3.80
   1  -1  11  177.12    3.65
   1  -1  11  181.53    4.69
   1  -1  12  121.50    7.07
   1  -1  12  117.17    4.01
   1  -1  12  108.22    3.04
  -1   1 -12  111.74    3.19
   1  -1  13   54.94    2.95
   1  -1  13   55.03    5.18
   1  -1  13   53.72    2.32
  -1   1 -13   59.51    2.51
  -1   1 -14    4.87    1.31
   1  -1  14    4.53    1.21
   1  -1  14    4.72    1.67
   1  -1  14    7.05    3.22
   1  -1  15    1.44    1.05
   1  -1  15    0.68    1.41
   1  -1  15    0.88    2.88
   1  -1  16    2.42    1.18
   1  -1  16   -0.65    1.32
   1  -1  17   80.07    3.35
   1  -1  17   79.20    6.00
   1  -1  17   80.62    4.13
   1  -1  18    0.51    1.41
   1  -1  18    2.34    3.45
   1  -1  18    0.16    1.16
   1  -1  19   28.01    2.44
   1  -1  19   28.64    2.80
   1  -1  20   -0.14    1.43
   1  -1  20    0.78    1.72
   1  -1  21    3.10    1.80
   1  -1  21    1.46    1.49
   1  -1  22   10.38    2.40
   1  -1  22   12.76    2.24
   1  -1  23    3.29    1.80
   1  -1  23    2.96    1.99
   1  -1  24   10.31    2.68
  -1   1 -24    7.46    4.87
   1  -1  24   18.22    2.64
  -1   0  25    1.92    2.12
  -1   0  24   13.38    2.46
   1   0 -24   13.52    4.81
   1   0 -24   21.62    6.85
  -1   0  23    3.81    2.02
   1   0 -23    1.95    3.76
   1   0 -23    1.49    5.05
  -1   0  22   13.16    2.35
   1   0 -22    5.43    3.94
  -1   0  21    4.00    1.71
   1   0 -21    0.62    3.65
  -1   0  20   68.04    3.73
   1   0 -20   57.54    5.99
   1   0 -19   84.04    6.62
  -1   0  19   89.16    3.98
  -1   0  19   92.65    4.39
   1   0 -18   41.36    5.08
  -1   0  18   45.03    2.84
  -1   0  18   44.83    3.09
  -1   0  17   32.27    2.35
  -1   0  17   23.24    2.44
   1   0 -17   30.30    4.56
   1   0 -16   13.25    3.41
  -1   0  16   12.45    1.95
  -1   0  16   17.27    1.79
  -1   0  15  429.15    6.94
  -1   0  15  402.94    8.12
  -1   0  14   39.26    2.65
  -1   0  14   37.62    2.12
  -1   0  13  381.40    5.94
  -1   0  13  423.27    7.32
  -1   0  12    1.99    0.86
  -1   0  12    3.04    1.18
  -1   0  11  146.57    6.34
  -1   0  11  141.80    3.95
  -1   0  11  139.47    3.26
  -1   0  10  603.89   12.10
  -1   0  10  637.10    7.80
  -1   0  10  616.19    6.43
  -1   0   9   20.78    1.23
  -1   0   9   20.01    1.56
  -1   0   9   22.77    2.96
  -1   0   8 1559.88   10.74
  -1   0   8 1530.36   17.23
  -1   0   8 1530.76    8.64
  -1   0   7  120.01    4.90
  -1   0   7  125.73    2.93
  -1   0   6 1260.26   13.94
  -1   0   6 1221.97    8.19
  -1   0   5 2266.90   17.50
  -1   0   5 2283.98    9.95
   1   0  -4   42.86    2.99
   1   0  -4   45.25    1.11
   1   0  -4   41.73    2.08
  -1   0   4   42.72    1.11
   1   0  -3   65.80    1.03
  -1   0   3   70.93    1.10
   1   0  -3   60.52    2.43
   1   0  -3   65.63    1.37
   1   0  -3   65.12    2.00
   1   0  -3   68.08    2.79
   1   0  -2 1720.72    9.18
  -1   0   2  815.36    5.39
  -1   0   2 1845.30    4.48
   1   0  -2 2010.34    7.87
   1   0  -2 1857.42    4.31
  -1   0   2 1167.49    8.26
  -1   0   1  214.45    1.75
   1   0  -1   54.02    1.39
   1   0  -1  222.04    2.71
   1   0   0    0.06    0.10
  -1   0   0   -0.20    0.17
   1   0   0   -0.19    0.20
   1   0   0    0.09    0.12
  -1   0   0    0.06    0.08
  -1   0  -1 2340.49   10.45
   1   0   1  297.51    2.07
   1   0   1  703.69    4.26
   1   0   1 1989.16    7.10
   1   0   2  324.23    2.57
   1   0   2  309.99    5.48
   1   0   2  320.34    3.30
  -1   0  -2  320.79    2.83
  -1   0  -2  325.62    6.23
   1   0   3   46.84    3.50
   1   0   3   55.85    1.17
  -1   0  -3   56.41    1.18
   1   0   3   61.31    1.31
   1   0   3   57.22    1.63
  -1   0  -3   43.20    3.40
   1   0   4  462.76    3.83
  -1   0  -4  438.62    3.59
   1   0   4  453.48    4.82
  -1   0  -4  447.49   10.32
   1   0   5 1478.70    9.65
  -1   0  -5 1450.47    7.22
   1   0   6  809.02    7.58
  -1   0  -6  812.25    5.96
   1   0   7  365.11    4.27
  -1   0  -7  359.31    4.30
   1   0   8 1124.15   10.14
   1   0   8 1144.33    8.02
   1   0   9  355.20    6.08
   1   0   9  341.68    9.82
  -1   0  -9  341.87    4.81
   1   0  10  210.66    7.92
   1   0  10  221.68    5.11
  -1   0 -10  212.74    4.01
   1   0  10  215.77    3.93
  -1   0 -11    9.05    1.28
   1   0  11   10.91    1.52
   1   0  11    8.60    1.07
   1   0  12  172.28    5.00
  -1   0 -12  165.90    4.04
   1   0  12  157.67    7.14
   1   0  12  165.69    3.90
  -1   0 -13  188.98    4.49
   1   0  13  190.08    5.35
   1   0  13  196.58    4.39
   1   0  13  190.77    7.80
   1   0  14  724.27    8.78
   1   0  14  721.88   14.81
   1   0  14  705.45   10.49
  -1   0 -14  710.14    8.84
   1   0  15  164.86    7.49
   1   0  15  164.58    5.37
   1   0  15  174.54    4.60
  -1   0 -15  165.84    4.57
   1   0  16   46.46    3.13
   1   0  16   42.16    2.56
  -1   0 -16   45.56    2.69
   1   0  17   45.02    3.41
   1   0  17   51.50    2.99
   1   0  18    5.96    1.88
   1   0  18    7.76    1.60
   1   0  19  156.11    5.19
   1   0  19  158.07    6.00
   1   0  20   -2.37    1.71
   1   0  20    0.68    1.81
   1   0  21   37.25    3.57
   1   0  21   47.79    3.30
   1   0  22    8.09    2.08
   1   0  22    7.91    2.39
   1   0  23   27.06    2.90
   1   0  23   20.31    2.97
  -1   0 -23   21.49    5.19
  -1   0 -24    5.82    4.52
   1   0  24    5.79    2.27
   1   1 -25    6.02    4.34
  -1  -1  25    1.55    2.03
   1   1 -24    3.56    3.68
  -1  -1  24    0.61    1.87
   1   1 -24   -5.94    5.17
   1   1 -23   -0.31    4.92
  -1  -1  23    0.88    1.62
   1   1 -23   -0.44    3.45
   1   1 -22   -1.26    4.86
   1   1 -22   -2.81    3.45
  -1  -1  22    0.80    1.51
   1   1 -21   10.46    3.75
  -1  -1  21    8.24    1.87
  -1  -1  20    7.64    1.65
   1   1 -20    4.06    3.24
  -1  -1  19   12.75    2.04
  -1  -1  19   12.78    1.84
  -1  -1  18    1.42    1.45
  -1  -1  18    5.27    1.45
  -1  -1  17    8.45    1.42
  -1  -1  17    4.30    1.58
  -1  -1  16   18.17    1.69
  -1  -1  16   19.99    2.13
  -1  -1  15   80.30    3.03
  -1  -1  15   77.58    3.75
  -1  -1  14    5.89    1.42
  -1  -1  14    9.59    1.27
  -1  -1  14    7.55    2.87
  -1  -1  13   37.07    4.22
  -1  -1  13   32.90    1.81
  -1  -1  13   31.98    2.28
  -1  -1  12   54.26    2.10
  -1  -1  12   55.89    2.69
  -1  -1  12   62.43    4.90
  -1  -1  11  212.88    4.65
  -1  -1  11  210.65    8.00
  -1  -1  11  202.32    3.68
  -1  -1  10  156.92    7.07
  -1  -1  10  165.85    4.27
  -1  -1  10  150.42    3.23
  -1  -1   9   43.22    1.55
  -1  -1   9   41.06    1.97
  -1  -1   9   36.97    3.72
  -1  -1   8   62.83    1.91
  -1  -1   8   64.12    2.45
  -1  -1   7   87.31    4.84
  -1  -1   7   76.42    1.89
  -1  -1   7   85.47    2.49
  -1  -1   6   40.81    1.64
  -1  -1   6   38.32    3.67
  -1  -1   6   43.56    1.22
  -1  -1   5   51.84    1.93
  -1  -1   5   27.96    3.60
  -1  -1   4  146.16    5.07
  -1  -1   4  143.76    1.69
   1   1  -4  126.73    5.29
   1   1  -4  135.57    3.97
   1   1  -4  118.85    1.78
   1   1  -3    8.67    0.43
   1   1  -3    9.74    1.99
   1   1  -3    9.99    0.93
  -1  -1   3    9.95    0.41
  -1  -1   3    9.94    1.39
  -1  -1   3    8.16    1.78
   1   1  -3    7.60    1.23
   1   1  -2    0.87    0.56
   1   1  -2    0.72    0.33
  -1  -1   2   -0.81    0.49
  -1  -1   2   -0.45    0.31
  -1  -1   2    0.61    0.43
   1   1  -2   -0.23    1.02
  -1  -1   2    1.59    1.04
  -1  -1   1    0.26    0.47
  -1  -1   1   -0.37    0.21
   1   1  -1   -0.09    0.15
   1   1  -1    0.17    0.51
   1   1   0    0.04    0.17
  -1  -1   0   -0.27    0.20
   1   1   0   22.07    0.78
  -1  -1   0    9.99    0.48
   1   1   0   22.81    0.81
  -1  -1  -1  509.69    4.46
   1   1   1  533.02    4.10
  -1  -1  -1  503.82    4.05
   1   1   1  488.82    2.61
   1   1   1  505.29    3.22
   1   1   1  516.42    3.92
  -1  -1  -2   12.87    1.53
   1   1   2   12.59    0.85
   1   1   2   13.48    1.29
  -1  -1  -2   12.13    0.92
   1   1   2   14.71    0.65
  -1  -1  -2   15.32    0.66
  -1  -1  -2   13.05    0.65
  -1  -1  -3 2101.74    7.92
  -1  -1  -3 2082.13   18.06
   1   1   3 2062.27    7.42
   1   1   3 2078.87    9.79
   1   1   4 2141.73    8.31
  -1  -1  -4 2043.68   21.74
  -1  -1  -4 2306.62    9.20
   1   1   4 2270.96   11.21
   1   1   4 2131.12   21.97
   1   1   5   13.37    0.87
  -1  -1  -5   14.39    0.98
   1   1   5   14.75    1.24
   1   1   5   13.88    2.26
   1   1   6   29.95    1.69
  -1  -1  -6   30.66    1.39
  -1  -1  -6   31.89    5.66
   1   1   6   31.49    1.35
   1   1   6   29.45    2.75
  -1  -1  -7  109.36    2.64
   1   1   7  107.75    2.48
   1   1   7  109.69    4.61
   1   1   7  106.62    3.13
  -1  -1  -8    0.66    0.76
   1   1   8    2.10    1.06
   1   1   8    1.87    0.73
   1   1   8   -0.25    1.79
   1   1   9   63.45    2.77
   1   1   9   69.01    4.12
  -1  -1  -9   63.65    2.32
   1   1   9   67.33    2.24
   1   1  10   70.10    4.14
  -1  -1 -10   70.34    2.54
   1   1  10   69.29    2.42
   1   1  10   59.95    2.78
   1   1  11   24.58    1.66
   1   1  11   23.42    2.04
   1   1  11   28.23    3.10
  -1  -1 -11   22.89    1.74
  -1  -1 -12   24.42    2.01
   1   1  12   27.45    1.93
   1   1  12   29.04    2.37
   1   1  13   26.50    2.30
   1   1  13   25.51    3.28
   1   1  13   26.60    1.91
  -1  -1 -13   27.57    2.08
  -1  -1 -14   14.95    1.98
   1   1  14    9.22    2.86
   1   1  14    8.81    1.97
   1   1  14   11.95    1.68
   1   1  15   42.82    2.99
   1   1  15   35.97    2.39
  -1  -1 -15   35.39    2.45
   1   1  16    1.35    1.26
  -1  -1 -16    0.86    1.35
   1   1  17   39.85    3.24
   1   1  17   45.91    2.86
   1   1  18    8.61    2.11
   1   1  18   12.06    1.76
   1   1  19    0.69    1.38
   1   1  19    5.48    2.09
   1   1  20   21.74    2.56
   1   1  20   12.31    2.43
   1   1  21    0.79    1.57
   1   1  21    5.26    2.26
   1   1  22   -0.65    1.84
   1   1  22    0.23    1.65
  -1  -1 -22   -3.79    3.84
   1   1  23   12.66    2.77
   1   1  23   25.17    3.13
  -1  -1 -23   16.99    4.55
  -1  -2  26   23.14    3.02
   1   2 -25    2.78    5.40
  -1  -2  25    9.83    2.33
   1   2 -25    5.66    4.05
  -1  -2  24   16.56    2.35
   1   2 -24   23.57    6.54
   1   2 -24   16.74    4.30
   1   2 -23   -1.39    5.30
   1   2 -23    2.77    3.49
  -1  -2  23    1.13    1.67
  -1  -2  22    5.78    1.67
   1   2 -22    8.40    4.03
   1   2 -22    4.26    4.94
  -1  -2  21   33.25    2.60
   1   2 -21   22.59    4.53
   1   2 -20   34.26    4.81
  -1  -2  20   34.74    2.61
  -1  -2  19   20.07    2.41
  -1  -2  19   22.53    2.07
  -1  -2  18  130.36    4.15
  -1  -2  18  116.45    4.64
  -1  -2  17    4.22    3.08
  -1  -2  17    0.28    1.27
  -1  -2  17    4.09    1.17
  -1  -2  16    0.21    1.31
  -1  -2  16   -1.25    3.03
  -1  -2  16    1.45    0.96
  -1  -2  15  150.47    4.76
  -1  -2  15  150.32    3.80
  -1  -2  15  142.95    7.86
  -1  -2  14   16.05    1.87
  -1  -2  14   19.80    1.50
  -1  -2  13  641.00    6.96
  -1  -2  13  623.18   15.16
  -1  -2  13  663.03    8.76
  -1  -2  12   38.97    1.74
  -1  -2  12   42.71    4.58
  -1  -2  12   45.25    2.38
  -1  -2  11  365.77    4.69
  -1  -2  11  348.75   10.85
  -1  -2  10  125.88    7.29
  -1  -2  10  117.15    2.68
  -1  -2  10  135.23    3.50
  -1  -2   9    8.84    1.10
  -1  -2   9    8.29    3.13
  -1  -2   9    6.64    0.86
  -1  -2   8 1136.70    6.84
  -1  -2   8 1132.15    8.43
  -1  -2   7  132.27    2.39
  -1  -2   7  141.64    7.17
  -1  -2   6  983.58    5.55
  -1  -2   6  963.82   15.38
  -1  -2   5   53.95    1.38
  -1  -2   5   53.68    5.57
   1   2  -4  165.50    2.12
  -1  -2   4  166.87    5.81
  -1  -2   4  161.04    1.87
   1   2  -4  168.81    2.12
   1   2  -4  166.45    3.76
   1   2  -3  921.56    6.75
  -1  -2   3  968.62   12.22
  -1  -2   3  950.68    7.38
  -1  -2   3  895.57   15.25
  -1  -2   3  948.41    4.00
   1   2  -3  960.53    5.60
   1   2  -3 1023.57    4.54
  -1  -2   2  489.74    7.71
  -1  -2   2  483.97    4.04
   1   2  -2  482.48    3.79
   1   2  -1 2067.82   14.04
   1   2  -1 2084.97    7.31
   1   2  -1 2140.80    7.03
   1   2  -1 1965.85   14.58
  -1  -2   1 2223.18   13.28
  -1  -2   1 1845.00    6.15
  -1  -2   0   60.30    0.96
   1   2   0   54.82    1.21
   1   2   0   53.37    1.17
   1   2   0   55.06    1.27
   1   2   0   55.71    0.99
  -1  -2   0   58.07    1.35
  -1  -2   0   57.13    1.18
  -1  -2   0   56.87    1.40
   1   2   1  201.46    2.64
   1   2   1  192.81    2.03
   1   2   1  203.01    2.40
   1   2   1  209.49    2.56
  -1  -2  -1  204.15    2.81
  -1  -2  -1  200.98    2.64
  -1  -2  -1  192.95    2.55
  -1  -2  -1  192.34    1.98
   1   2   2  380.66    4.01
  -1  -2  -2  373.81    3.49
  -1  -2  -2  370.71    5.23
   1   2   3 4003.73   17.43
   1   2   3 3963.82   11.38
   1   2   3 3968.42   14.10
   1   2   4   31.22    1.50
  -1  -2  -4   32.35    1.33
   1   2   4   34.07    1.59
  -1  -2  -4   29.50    2.96
   1   2   4   31.42    1.24
  -1  -2  -5  710.79    5.97
   1   2   5  730.96    7.44
   1   2   6  312.36    5.10
  -1  -2  -6  295.51   11.80
  -1  -2  -6  297.29    4.20
   1   2   6  307.28    4.12
   1   2   6  316.43    5.55
  -1  -2  -7    3.55    4.29
   1   2   7    4.41    0.88
   1   2   7    6.01    1.12
  -1  -2  -7    2.87    0.85
   1   2   7    3.48    1.40
  -1  -2  -8  387.76    5.44
   1   2   8  405.25    7.37
   1   2   8  412.75    5.39
   1   2   8  403.96    6.46
   1   2   9  212.42    4.15
  -1  -2  -9  201.58    4.23
   1   2   9  209.23    5.00
   1   2  10  212.27    5.19
  -1  -2 -10  205.23    4.39
   1   2  10  210.77    4.30
   1   2  11   16.15    1.89
   1   2  11   11.94    1.36
  -1  -2 -11   12.61    1.52
  -1  -2 -12  218.86    4.99
   1   2  12  222.01    5.81
   1   2  12  226.30    4.96
  -1  -2 -13   47.89    2.64
   1   2  13   51.74    2.60
   1   2  14   62.25    3.53
  -1  -2 -14   67.12    3.16
   1   2  14   66.06    3.02
  -1  -2 -15   30.29    2.49
   1   2  15   25.68    2.80
   1   2  15   25.32    2.31
   1   2  16   29.65    2.93
   1   2  16   37.95    2.66
  -1  -2 -16   30.81    2.52
   1   2  17   95.87    4.17
  -1  -2 -17  100.29    4.18
   1   2  17   99.04    4.70
   1   2  18   20.66    2.85
   1   2  18   18.67    2.25
   1   2  19   22.90    2.88
   1   2  19   26.68    2.76
   1   2  20    4.28    2.30
  -1  -2 -20    1.25    3.73
   1   2  20    2.24    1.65
   1   2  21    1.68    1.80
  -1  -2 -21    3.41    3.63
   1   2  21    0.01    1.91
  -1  -2 -22   13.73    4.30
   1   2  22   12.20    2.52
   1   2  22    7.83    2.55
   1   2  23   23.15    3.09
   1   2  23   17.48    3.09
  -1  -2 -23   13.91    5.10
  -1  -3  26    4.56    2.07
   1   3 -25   -4.86    5.41
   1   3 -25    4.22    3.97
  -1  -3  25    0.80    1.60
   1   3 -24    2.39    5.27
  -1  -3  24    6.16    1.96
   1   3 -24    2.10    3.79
   1   3 -23   26.90    5.19
  -1  -3  23   19.73    2.38
   1   3 -23   27.81    6.35
   1   3 -22    4.34    3.50
   1   3 -22   -0.54    4.68
  -1  -3  22   -1.20    1.35
   1   3 -21    6.35    3.13
  -1  -3  21    4.06    1.53
  -1  -3  20    4.57    3.67
  -1  -3  20    3.24    1.31
  -1  -3  20    2.49    1.57
  -1  -3  19    1.94    1.46
  -1  -3  19   -2.72    3.76
  -1  -3  19    1.50    1.17
  -1  -3  18   20.55    2.30
  -1  -3  18   21.77    4.35
  -1  -3  18   24.38    1.94
  -1  -3  17   37.99    2.74
  -1  -3  17   47.32    2.39
  -1  -3  17   48.51    5.60
  -1  -3  16   -0.95    3.50
  -1  -3  16    0.05    0.94
  -1  -3  16    1.78    1.36
  -1  -3  15   44.68    5.52
  -1  -3  15   49.46    2.98
  -1  -3  15   58.42    2.42
  -1  -3  14   43.99    1.97
  -1  -3  14   40.22    2.50
  -1  -3  14   41.56    5.12
  -1  -3  13  155.74    3.39
  -1  -3  13  147.14    4.26
  -1  -3  13  161.35    8.72
  -1  -3  12    9.87    1.51
  -1  -3  12    8.49    3.75
  -1  -3  12    6.89    1.09
  -1  -3  11  201.09    9.33
  -1  -3  11  195.50    3.47
  -1  -3  11  206.28    4.29
  -1  -3  10  103.11    2.62
  -1  -3  10  109.50    8.51
  -1  -3  10  123.02    3.50
  -1  -3   9  351.87    4.12
  -1  -3   9  346.58   11.49
  -1  -3   9  332.24    4.89
  -1  -3   8   10.37    0.92
  -1  -3   8    5.35    3.37
  -1  -3   7   62.15    1.85
  -1  -3   7   56.98    5.16
  -1  -3   7   62.62    1.65
  -1  -3   6  116.93    2.28
  -1  -3   6  116.81    7.17
  -1  -3   5   73.75    5.34
   1   3  -5   70.91    2.78
   1   3  -5   74.19    1.85
  -1  -3   5   66.39    1.54
  -1  -3   4  702.68    4.56
   1   3  -4  701.47    4.80
   1   3  -4  701.82    6.62
   1   3  -3   89.85    1.49
   1   3  -3   88.18    1.91
  -1  -3   3   88.98    1.51
  -1  -3   2  189.63    2.68
   1   3  -2  194.93    2.16
  -1  -3   2  195.72    2.29
  -1  -3   1  197.26    2.29
   1   3  -1  191.27    2.17
   1   3  -1  188.72    2.45
  -1  -3   0    4.03    0.67
   1   3   0    4.40    0.51
   1   3   0    4.81    0.57
  -1  -3   0    4.33    0.47
  -1  -3   0    3.97    0.46
  -1  -3   0    5.18    0.62
   1   3   1   57.25    1.56
  -1  -3  -1   58.11    1.52
   1   3   1   56.36    1.40
   1   3   1   61.59    1.44
  -1  -3  -1   62.23    1.74
  -1  -3  -2  828.84    7.22
   1   3   2  833.38    6.19
  -1  -3  -2  840.02    5.71
   1   3   3 1279.78    8.43
  -1  -3  -3 1268.71   12.48
  -1  -3  -3 1281.32    7.66
   1   3   4   83.96    2.44
  -1  -3  -4   82.82    4.71
  -1  -3  -4   77.97    2.13
   1   3   4   83.33    2.06
  -1  -3  -5  347.77    4.60
   1   3   5  359.01    5.23
  -1  -3  -6   32.45    1.63
   1   3   6   34.60    1.58
   1   3   6   36.23    1.94
   1   3   7  296.85    4.60
   1   3   7  296.72    5.40
  -1  -3  -7  294.13    4.73
   1   3   8  269.49    4.61
  -1  -3  -8  265.59    4.79
   1   3   9   77.58    2.75
  -1  -3  -9   84.09    2.87
   1   3   9   80.31    3.23
   1   3  10  134.02    3.77
   1   3  10  136.44    4.45
  -1  -3 -10  129.01    3.73
  -1  -3 -11   52.31    2.57
   1   3  11   55.83    3.06
   1   3  11   54.55    2.51
  -1  -3 -12   13.22    1.98
   1   3  12   15.54    2.04
   1   3  12   18.57    2.30
  -1  -3 -13   32.44    2.33
   1   3  13   29.98    2.20
   1   3  13   26.45    2.45
   1   3  14   20.93    2.08
   1   3  14   22.74    2.42
  -1  -3 -14   19.69    2.06
   1   3  15   23.36    2.49
  -1  -3 -15   27.62    2.43
   1   3  15   22.18    2.12
   1   3  16   15.93    2.03
  -1  -3 -16   13.72    2.03
   1   3  16   12.55    2.34
   1   3  17   42.07    3.41
  -1  -3 -17   41.53    3.01
   1   3  17   43.86    3.12
  -1  -3 -18    0.52    1.56
   1   3  18    1.78    1.70
   1   3  18    1.67    1.96
  -1  -3 -19    2.99    3.51
   1   3  19    4.05    1.97
   1   3  19    4.87    1.75
   1   3  20    0.11    1.91
   1   3  20    0.07    1.53
   1   3  21    1.85    1.90
  -1  -3 -21   -1.02    3.84
   1   3  21    0.37    1.68
   1   3  22    3.21    2.34
   1   3  22    2.37    2.10
  -1  -3 -22    8.83    4.40
  -1  -4  27   12.77    2.48
   1   4 -26   10.62    6.23
  -1  -4  26    4.78    1.90
   1   4 -26   -2.34    3.95
   1   4 -25   18.37    6.22
  -1  -4  25   16.01    2.30
   1   4 -25   13.07    4.55
  -1  -4  24    2.60    1.54
   1   4 -24    7.51    5.60
   1   4 -23   46.06    5.73
   1   4 -23   55.65    7.41
  -1  -4  23   50.74    3.27
   1   4 -22   51.57    7.27
   1   4 -22   57.66    5.84
  -1  -4  22   60.08    3.28
  -1  -4  21    1.84    1.20
  -1  -4  21    2.29    4.00
  -1  -4  20   82.83    7.42
  -1  -4  20   89.28    3.52
  -1  -4  19   11.42    1.49
  -1  -4  19    7.97    1.85
  -1  -4  18  176.06    4.49
  -1  -4  18  159.23    5.20
  -1  -4  17   18.64    4.88
  -1  -4  17   22.10    2.20
  -1  -4  17   22.00    1.78
  -1  -4  16   13.50    1.84
  -1  -4  16   15.89    1.47
  -1  -4  16   16.65    4.46
  -1  -4  15  121.79    3.23
  -1  -4  15  119.60    4.11
  -1  -4  15  120.06    8.37
  -1  -4  14   27.06    5.35
  -1  -4  14   21.78    1.55
  -1  -4  14   25.89    2.04
  -1  -4  13  613.60    7.91
  -1  -4  13  654.72    6.74
  -1  -4  13  626.19   17.47
  -1  -4  12   21.91    1.53
  -1  -4  12   25.90    2.08
  -1  -4  11  482.45    6.34
  -1  -4  11  479.75   14.90
  -1  -4  11  461.86    5.30
  -1  -4  10   52.70    5.85
  -1  -4  10   43.89    1.75
  -1  -4  10   48.99    2.06
  -1  -4   9   70.41    2.54
  -1  -4   9   68.26    6.74
  -1  -4   8  408.47    4.57
  -1  -4   8  404.60    4.55
  -1  -4   8  391.56   12.61
  -1  -4   7 1044.04    7.12
   1   4  -7 1084.16   24.32
   1   4  -6  884.67    9.76
  -1  -4   6  885.22    6.22
  -1  -4   5 1565.70    8.07
   1   4  -5 1514.60    6.41
  -1  -4   5 1846.49   10.77
   1   4  -5 1739.18    8.90
   1   4  -5 1527.10   10.69
   1   4  -5 1336.20   22.87
  -1  -4   4  759.11    5.26
   1   4  -4  788.07    6.50
   1   4  -4  745.71    5.13
  -1  -4   4  725.53    6.53
   1   4  -4  713.65    5.89
  -1  -4   3  680.64    4.78
  -1  -4   3  681.01    4.57
   1   4  -3  672.23    4.33
   1   4  -2 2533.86    7.50
  -1  -4   2 2531.06    7.74
   1   4  -1   12.83    0.70
  -1  -4   1   11.71    0.73
  -1  -4   1   12.41    0.76
   1   4  -1   11.55    0.83
  -1  -4   0  608.24    4.21
   1   4   0  608.86    4.46
   1   4   0  595.06    4.83
   1   4   0  611.30    4.42
   1   4   1  238.13    3.16
   1   4   1  238.41    2.84
  -1  -4  -1  242.35    3.00
  -1  -4  -2  208.21    3.21
  -1  -4  -2  212.61    3.70
   1   4   2  204.09    3.18
   1   4   2  208.05    3.27
   1   4   3 1524.91    8.96
  -1  -4  -3 1541.64    9.10
   1   4   3 1535.77    9.62
  -1  -4  -4    6.07    0.94
  -1  -4  -4    6.84    2.22
   1   4   4    5.50    0.87
   1   4   4    5.61    0.93
   1   4   5  539.19    6.56
   1   4   5  559.21    6.05
  -1  -4  -5  543.55    6.07
   1   4   6   72.93    2.67
   1   4   6   69.10    2.34
  -1  -4  -6   71.76    2.44
  -1  -4  -6   66.52    5.96
   1   4   7  468.35    6.91
  -1  -4  -7  471.87    6.26
  -1  -4  -8  369.47    5.89
   1   4   8  388.05    6.64
   1   4   8  375.97    5.86
   1   4   9   57.33    2.62
  -1  -4  -9   59.80    2.69
   1   4   9   58.31    2.99
   1   4  10  132.84    4.31
  -1  -4 -10  128.54    3.85
   1   4  10  126.66    3.82
   1   4  11    7.46    1.42
  -1  -4 -11    9.89    1.62
   1   4  11   11.89    1.87
   1   4  12  149.08    4.51
   1   4  12  158.08    5.05
  -1  -4 -12  151.38    4.48
   1   4  13   34.27    2.49
  -1  -4 -13   35.81    2.52
   1   4  13   37.47    2.88
   1   4  14   55.95    3.16
   1   4  14   53.56    3.48
  -1  -4 -14   50.88    3.02
   1   4  15   11.17    1.88
  -1  -4 -15   12.40    1.89
   1   4  15   11.36    1.93
   1   4  16   10.25    1.88
   1   4  16   10.74    2.23
  -1  -4 -16   10.33    1.94
  -1  -4 -17   28.94    2.77
  -1  -4 -17   19.66    4.29
   1   4  17   22.64    2.52
   1   4  17   28.34    3.01
   1   4  18   33.25    3.14
   1   4  18   30.73    3.27
  -1  -4 -18   31.40    2.88
   1   4  19   -1.54    2.02
  -1  -4 -19    4.00    3.86
   1   4  19    2.86    2.00
  -1  -4 -20   -1.84    3.70
   1   4  20   -3.53    2.23
   1   4  20   -0.63    1.88
  -1  -4 -21    5.46    3.95
   1   4  21    7.92    2.43
   1   4  21   14.50    2.75
   1   4  22    6.68    2.65
  -1  -5  27   11.79    2.35
   1   5 -26    5.42    6.03
   1   5 -26    5.94    4.15
  -1  -5  26   -0.46    1.61
  -1  -5  25    1.69    1.57
   1   5 -25    2.32    3.98
   1   5 -25    4.69    5.70
   1   5 -24    6.75    3.85
   1   5 -24   16.92    5.54
  -1  -5  24   12.03    1.92
   1   5 -23   19.15    5.53
  -1  -5  23   14.57    2.01
   1   5 -23   19.04    4.15
  -1  -5  23   14.30    5.02
  -1  -5  22    1.70    4.20
   1   5 -22   -2.98    4.65
  -1  -5  22    0.69    1.24
  -1  -5  21   15.88    4.77
  -1  -5  21   10.61    1.58
  -1  -5  20   19.84    5.25
  -1  -5  20   28.75    2.15
  -1  -5  19   42.91    2.38
  -1  -5  19   36.78    2.79
  -1  -5  18   24.46    1.89
  -1  -5  18   25.75    2.40
  -1  -5  17   14.98    1.45
  -1  -5  17   17.68    5.14
  -1  -5  17   15.90    1.92
  -1  -5  16   37.16    2.56
  -1  -5  16   44.70    2.20
  -1  -5  15    2.66    1.22
  -1  -5  15    2.19    0.98
  -1  -5  14   20.41    1.40
  -1  -5  14   17.85    4.98
  -1  -5  14   22.12    1.83
  -1  -5  13  200.16    4.56
  -1  -5  13  199.20    3.80
  -1  -5  12   17.49    1.59
  -1  -5  12   15.38    4.73
  -1  -5  12   16.24    1.28
  -1  -5  11  121.93    3.10
  -1  -5  11  124.06    8.61
  -1  -5  11  115.27    2.77
  -1  -5  10   52.91    2.08
  -1  -5  10   53.04    2.12
   1   5  -9   -5.84    5.51
  -1  -5   9    1.77    0.75
  -1  -5   9   -4.39    4.00
  -1  -5   9    1.25    0.82
   1   5  -8  202.31   12.12
  -1  -5   8  170.75    3.18
  -1  -5   7  127.76    2.71
   1   5  -7  123.57    8.91
   1   5  -6 1300.63   10.67
  -1  -5   6 1318.20    8.34
  -1  -5   5   31.39    1.34
   1   5  -5   30.87    1.52
   1   5  -5   32.52    0.90
   1   5  -4 1912.46    8.63
   1   5  -4 1917.69    8.02
   1   5  -3   76.40    1.35
  -1  -5   3   74.91    1.47
  -1  -5   3   74.88    1.71
  -1  -5   3   72.19    2.16
  -1  -5   2  955.74    6.52
   1   5  -2  965.28    4.67
  -1  -5   1  529.71    4.02
  -1  -5   1  527.87    4.31
   1   5   0   47.64    1.38
  -1  -5   0   51.11    1.61
  -1  -5   0   49.61    1.85
   1   5   0   49.72    1.58
  -1  -5   0   51.36    1.36
   1   5   0   47.23    1.39
   1   5   1  460.39    4.59
  -1  -5  -1  465.97    4.35
  -1  -5  -1  470.93    4.81
   1   5   2   61.62    1.93
  -1  -5  -2   60.67    1.93
  -1  -5  -2   60.38    2.04
   1   5   3    3.03    0.82
  -1  -5  -3    2.24    1.32
  -1  -5  -3    3.31    0.86
   1   5   3    3.02    0.77
  -1  -5  -4    1.70    0.71
  -1  -5  -4    1.53    0.85
   1   5   4    1.68    0.89
   1   5   4    1.32    0.83
  -1  -5  -4    2.74    1.96
   1   5   5   49.04    2.13
  -1  -5  -5   42.88    2.35
  -1  -5  -5   51.08    2.22
   1   5   5   49.19    2.24
  -1  -5  -6    3.22    2.90
   1   5   6    1.02    1.02
  -1  -5  -6    1.08    0.86
   1   5   6    2.75    0.99
  -1  -5  -7  363.86    5.79
   1   5   7  368.93    6.27
  -1  -5  -8   46.39    2.35
   1   5   8   39.47    2.31
   1   5   8   40.26    2.26
   1   5   9  118.30    4.04
   1   5   9  113.57    3.69
  -1  -5  -9  119.17    3.74
   1   5  10   90.71    3.67
   1   5  10   87.10    3.40
  -1  -5 -10   81.83    3.31
  -1  -5 -11   22.61    2.13
   1   5  11   25.55    2.35
   1   5  11   19.69    2.00
   1   5  12  242.33    5.97
  -1  -5 -12  236.29    5.72
   1   5  12  232.71    6.15
   1   5  13   10.48    2.02
  -1  -5 -13   15.56    2.01
   1   5  13   11.08    1.70
   1   5  14  149.87    5.47
  -1  -5 -14  155.55    5.11
   1   5  14  156.13    5.34
  -1  -5 -15   20.18    2.32
   1   5  15   20.48    2.54
   1   5  15   19.08    2.18
  -1  -5 -16    1.63    1.65
   1   5  16   -0.25    1.45
   1   5  16   -2.10    1.79
  -1  -5 -16    0.55    3.15
  -1  -5 -17   28.70    4.58
  -1  -5 -17   28.96    2.80
   1   5  17   28.76    3.04
   1   5  17   22.75    2.77
  -1  -5 -18    4.45    3.60
   1   5  18    2.96    2.01
  -1  -5 -18    0.64    1.74
   1   5  18    2.62    2.04
  -1  -5 -19   17.99    4.27
   1   5  19   28.79    3.36
  -1  -5 -19   24.81    2.91
   1   5  19   16.12    2.93
   1   5  20    2.05    2.21
   1   5  20   -1.96    2.13
  -1  -5 -20    1.89    3.51
   1   5  21    2.12    2.01
   1   5  21    0.49    1.95
  -1  -6  27   10.57    2.12
   1   6 -27    6.52    4.50
   1   6 -27    8.77    5.85
   1   6 -26   -3.43    5.27
  -1  -6  26   -0.64    1.50
   1   6 -26    0.86    3.96
   1   6 -25   10.34    4.40
   1   6 -25   18.99    6.09
  -1  -6  25   13.41    2.09
   1   6 -24   36.77    5.45
  -1  -6  24   33.23    6.31
   1   6 -24   47.33    7.42
  -1  -6  24   39.83    2.84
  -1  -6  23   23.51    2.25
  -1  -6  23   20.19    5.89
   1   6 -23   10.83    5.19
  -1  -6  22   51.63    7.03
   1   6 -22   61.17    7.31
  -1  -6  22   56.53    3.01
  -1  -6  21   44.65    2.64
  -1  -6  21   41.85    6.63
  -1  -6  20  123.79    9.75
  -1  -6  20  129.66    3.98
  -1  -6  19    5.25    1.13
  -1  -6  19    4.78    4.74
  -1  -6  19    6.82    1.65
  -1  -6  18  274.55    5.29
  -1  -6  18  275.78    6.49
  -1  -6  18  283.38   13.85
  -1  -6  17  113.52    4.20
  -1  -6  17  114.17    9.55
  -1  -6  17  118.53    3.47
  -1  -6  16  211.54   12.03
  -1  -6  16  207.41    5.11
  -1  -6  16  206.76    4.28
  -1  -6  15  156.40   10.98
  -1  -6  15  139.79    3.50
  -1  -6  15  151.93    4.24
  -1  -6  14  159.44    3.61
  -1  -6  14  157.68    4.10
  -1  -6  13  439.82   16.53
  -1  -6  13  443.66    6.36
  -1  -6  13  434.01    5.75
  -1  -6  12   30.46    1.75
  -1  -6  12   36.88    1.95
  -1  -6  12   39.62    6.96
  -1  -6  11  363.96    5.29
  -1  -6  11  350.31    4.99
  -1  -6  10   22.66    1.61
  -1  -6  10   20.09    1.58
  -1  -6   9  659.75    6.79
   1   6  -9  597.44   20.51
  -1  -6   8 1005.12    8.16
   1   6  -8 1044.18   11.58
   1   6  -7  761.01    8.71
  -1  -6   7  754.32    7.00
   1   6  -6  533.56    5.86
   1   6  -6  546.81    4.00
   1   6  -5  393.63    5.81
   1   6  -5  402.63    4.18
  -1  -6   5  395.27    4.66
   1   6  -5  401.76    2.68
  -1  -6   4 1428.61    8.41
   1   6  -4 1444.93    5.90
  -1  -6   3  808.40    4.43
   1   6  -3  805.35    4.09
  -1  -6   2 1643.41    8.74
   1   6  -2 1658.16    6.25
   1   6  -1   93.25    1.77
   1   6  -1   87.63    2.04
  -1  -6   1   92.97    2.00
  -1  -6   1   99.69    1.93
   1   6  -1   93.85    2.26
  -1  -6   1  101.91    2.08
  -1  -6   0 1814.39   10.34
   1   6   0 1804.84    8.47
  -1  -6   0 1827.55    8.25
  -1  -6  -1  369.82    5.53
  -1  -6  -1  377.10    4.73
  -1  -6  -1  385.28    4.12
   1   6   1  379.28    4.37
   1   6   2  349.93    4.58
  -1  -6  -2  351.92    4.78
  -1  -6  -2  357.36    4.84
  -1  -6  -3  488.56    7.17
   1   6   3  478.51    5.73
  -1  -6  -4  172.07    3.07
   1   6   4  188.37    3.98
  -1  -6  -4  174.65    5.87
   1   6   4  191.73    4.11
  -1  -6  -4  182.95    3.94
  -1  -6  -5  244.67    4.59
   1   6   5  242.13    4.72
   1   6   5  248.78    4.85
   1   6   6   19.14    2.20
  -1  -6  -6   18.89    1.92
  -1  -6  -6   15.17    3.95
   1   6   6   18.01    2.00
   1   6   7  465.59    7.28
  -1  -6  -7  460.74    6.86
  -1  -6  -7  445.79   15.02
   1   6   8    3.89    1.30
  -1  -6  -8    4.43    1.29
   1   6   8    4.38    1.31
  -1  -6  -9  499.56    7.74
   1   6   9  483.08    7.94
   1   6  10  148.38    4.68
   1   6  10  151.81    4.75
  -1  -6 -10  145.38    4.39
   1   6  11   90.16    3.89
   1   6  11   97.54    4.03
  -1  -6 -11   93.50    3.73
  -1  -6 -12  206.25    5.65
   1   6  12  215.50    6.09
   1   6  12  217.80    6.11
  -1  -6 -13    6.82    3.17
   1   6  13    3.86    1.59
   1   6  13    8.61    1.93
  -1  -6 -13    4.38    1.61
   1   6  14   16.00    2.37
  -1  -6 -14   17.86    2.27
  -1  -6 -14   18.42    3.86
   1   6  14   16.76    2.33
   1   6  15    6.97    1.97
  -1  -6 -15    2.98    1.66
   1   6  15    1.97    1.70
  -1  -6 -15   -0.96    3.11
   1   6  16   65.83    4.17
  -1  -6 -16   64.71    3.82
  -1  -6 -16   52.76    5.45
   1   6  16   58.19    3.91
  -1  -6 -17    2.78    3.21
   1   6  17    3.92    1.96
  -1  -6 -17    2.02    1.74
   1   6  17    5.38    2.21
   1   6  18   20.55    2.86
   1   6  18   21.35    2.89
  -1  -6 -18   18.11    4.01
  -1  -6 -18   23.13    2.82
  -1  -6 -19    1.89    2.00
  -1  -6 -19   -1.70    3.29
   1   6  19   -0.44    1.85
   1   6  19    2.64    2.25
   1   6  20    4.13    2.49
   1   6  20    4.50    2.41
  -1  -7  28    4.36    1.99
   1   7 -27   -2.61    5.40
   1   7 -27    3.40    4.29
  -1  -7  27    0.76    1.66
   1   7 -26   10.91    5.72
  -1  -7  26    0.57    1.39
   1   7 -26    7.31    4.30
   1   7 -25   -1.79    3.54
  -1  -7  25    5.85    5.00
  -1  -7  25    2.70    1.51
   1   7 -25   -0.46    4.83
   1   7 -24   22.61    6.04
  -1  -7  24   37.07    2.69
  -1  -7  24   28.21    6.10
  -1  -7  23    3.79    1.43
  -1  -7  23    8.61    5.41
   1   7 -23    5.17    4.47
   1   7 -22    5.11    4.53
  -1  -7  22    1.95    1.25
  -1  -7  22    8.40    5.16
  -1  -7  21   13.62    1.62
  -1  -7  21   14.43    5.50
  -1  -7  20   19.78    5.71
  -1  -7  20    8.47    1.37
  -1  -7  19   44.04    7.04
  -1  -7  19   30.34    2.06
  -1  -7  18   93.50    9.12
  -1  -7  18   87.40    3.68
  -1  -7  18   85.20    3.01
  -1  -7  17  164.81   11.55
  -1  -7  17  164.51    4.74
  -1  -7  17  158.83    3.92
  -1  -7  16   36.78    2.03
  -1  -7  16   34.06    6.61
  -1  -7  16   47.03    2.55
  -1  -7  15   24.63    1.87
  -1  -7  15   23.14    1.68
  -1  -7  15   20.23    5.84
  -1  -7  14    0.85    0.81
  -1  -7  14   -1.30    5.26
  -1  -7  14    0.67    0.81
  -1  -7  13   39.92    1.96
  -1  -7  13   38.52    1.96
  -1  -7  13   33.08    6.68
   1   7 -12   27.98    7.60
  -1  -7  12   33.78    1.82
  -1  -7  12   32.40    6.49
  -1  -7  12   29.08    1.83
  -1  -7  11  291.70    4.88
   1   7 -11  304.97   16.59
  -1  -7  10   91.27    2.80
   1   7 -10   88.33    9.51
  -1  -7   9   70.01    2.43
   1   7  -9   68.10    3.37
   1   7  -8   67.89    2.93
  -1  -7   8   71.65    2.40
  -1  -7   7    0.84    0.73
   1   7  -7    0.69    0.90
   1   7  -6  784.65    6.33
   1   7  -6  831.04    9.54
   1   7  -6  774.46    4.31
  -1  -7   6  742.36    7.01
   1   7  -6  816.78    4.03
  -1  -7   5  172.41    3.29
   1   7  -5  167.24    1.59
   1   7  -5  170.58    2.24
  -1  -7   4  671.08    4.42
   1   7  -4  673.30    3.65
  -1  -7   4  682.76    6.23
  -1  -7   3  211.51    1.74
  -1  -7   3  213.68    2.33
  -1  -7   3  217.35    3.75
   1   7  -3  223.66    2.14
   1   7  -3  216.41    2.34
   1   7  -2  243.16    2.53
  -1  -7   2  242.45    3.51
  -1  -7   2  245.42    2.43
   1   7  -1  335.23    3.42
  -1  -7   1  325.24    3.77
  -1  -7   1  351.59    4.08
   1   7  -1  315.27    4.15
  -1  -7   1  347.42    3.86
  -1  -7   0   72.12    2.15
  -1  -7   0   75.36    2.44
  -1  -7   0   74.59    1.81
   1   7   0   71.79    1.83
   1   7   1   42.46    1.62
  -1  -7  -1   42.60    1.50
  -1  -7  -1   45.19    1.90
  -1  -7  -1   47.07    2.20
  -1  -7  -2   51.75    2.08
  -1  -7  -2   48.86    2.59
  -1  -7  -2   49.17    1.94
   1   7   2   49.96    1.90
  -1  -7  -3  192.91    4.60
   1   7   3  202.16    3.92
  -1  -7  -3  198.39    4.11
  -1  -7  -3  198.01    5.32
  -1  -7  -4  123.25    3.34
   1   7   4  121.10    3.32
  -1  -7  -4  121.22    5.01
  -1  -7  -4  113.42    4.78
   1   7   5  329.63    5.58
  -1  -7  -5  292.10    8.80
  -1  -7  -5  327.09    7.67
  -1  -7  -5  288.25    4.94
  -1  -7  -5  325.29    5.62
  -1  -7  -6   11.68    2.58
  -1  -7  -6    6.51    3.14
   1   7   6   11.74    1.62
  -1  -7  -6    9.58    1.59
  -1  -7  -6    6.37    1.52
  -1  -7  -7    7.21    1.56
   1   7   7    9.40    1.70
  -1  -7  -7   11.42    2.61
  -1  -7  -7   13.86    4.81
   1   7   7    9.60    1.56
  -1  -7  -8    0.96    1.26
  -1  -7  -8    1.39    4.35
  -1  -7  -8    0.96    2.06
   1   7   8    1.32    1.18
   1   7   8    1.00    1.14
   1   7   9   16.27    1.93
  -1  -7  -9   19.64    3.29
  -1  -7  -9   15.60    2.06
   1   7   9   14.34    1.91
  -1  -7 -10  175.16    4.96
   1   7  10  167.07    5.26
   1   7  10  159.76    4.92
   1   7  11    6.34    1.61
  -1  -7 -11    9.49    1.89
   1   7  11    5.19    1.65
  -1  -7 -11    5.16    2.40
   1   7  12  121.21    4.90
  -1  -7 -12  123.06    4.50
  -1  -7 -12  122.99    6.71
   1   7  12  122.64    4.79
  -1  -7 -13    6.39    1.78
   1   7  13    7.52    1.88
   1   7  13    6.02    1.76
  -1  -7 -13    9.56    3.47
  -1  -7 -14   95.36    6.57
   1   7  14   99.13    4.61
  -1  -7 -14  100.37    4.45
   1   7  14  105.67    5.03
   1   7  15    4.39    1.85
   1   7  15    8.39    2.12
  -1  -7 -15    1.46    3.09
  -1  -7 -15    5.04    1.77
   1   7  16    5.80    2.04
  -1  -7 -16    3.55    1.73
   1   7  16    5.03    1.98
  -1  -7 -16    1.38    2.99
   1   7  17   12.40    2.37
  -1  -7 -17   18.38    4.08
  -1  -7 -17   15.12    2.57
   1   7  17   16.74    2.54
   1   7  18    0.63    1.87
  -1  -7 -18    2.20    3.28
  -1  -7 -18    2.55    2.05
  -1  -7 -19   36.23    5.31
   1   7  19   35.65    3.62
  -1  -7 -19   36.54    3.58
   1   7  20    6.02    2.45
  -1  -7 -20   13.63    4.26
  -1  -8  28    5.90    1.81
   1   8 -27   23.89    6.68
  -1  -8  27   21.55    2.48
   1   8 -27   24.74    5.24
   1   8 -26   24.11    5.20
   1   8 -26   22.47    6.18
  -1  -8  26   22.28    2.32
  -1  -8  26   20.49    6.53
  -1  -8  25    8.92    1.73
  -1  -8  25   14.28    5.81
   1   8 -25   13.82    5.45
  -1  -8  24   69.18    3.36
   1   8 -24   72.54    7.82
   1   8 -23   42.80    6.59
  -1  -8  23   34.34    6.88
  -1  -8  23   32.77    2.40
   1   8 -22   55.52    6.76
  -1  -8  22   49.50    2.74
   1   8 -21   15.22    4.32
  -1  -8  21   21.79    1.92
  -1  -8  21   19.09    6.37
  -1  -8  20   30.15    6.65
  -1  -8  20   31.30    2.14
  -1  -8  19   -1.54    4.86
  -1  -8  19    4.44    1.10
  -1  -8  18   80.04    3.00
  -1  -8  18   77.57    9.13
  -1  -8  17   17.12    6.18
  -1  -8  17    9.70    1.40
  -1  -8  16  374.39   17.36
  -1  -8  16  395.99    6.11
  -1  -8  15  162.65   12.03
  -1  -8  15  175.15    4.09
  -1  -8  14  343.03   16.42
  -1  -8  14  382.93    5.90
   1   8 -13  445.09   21.41
  -1  -8  13  422.82    6.21
   1   8 -12   55.06    8.81
  -1  -8  12   66.08    2.60
   1   8 -11  507.73    9.64
  -1  -8  11  486.71    6.59
  -1  -8  10   41.80    2.14
   1   8 -10   48.04    3.18
   1   8  -9  775.14    9.69
  -1  -8   9  737.57    8.06
   1   8  -8  300.61    5.13
  -1  -8   8  302.39    5.06
  -1  -8   7  581.95    6.89
   1   8  -7  590.88    5.98
   1   8  -7  573.92    4.09
   1   8  -6 1092.27    4.51
   1   8  -6 1109.59    4.68
   1   8  -6 1090.18    6.14
   1   8  -6 1088.04   11.37
  -1  -8   6 1070.65    8.89
   1   8  -5   26.69    0.70
  -1  -8   5   29.87    1.56
   1   8  -5   27.31    0.79
   1   8  -4  139.63    1.72
  -1  -8   4  140.01    3.44
  -1  -8   4  143.47    1.44
  -1  -8   4  143.66    3.11
   1   8  -3   29.87    1.14
  -1  -8   3   29.93    1.54
  -1  -8   3   30.41    0.99
   1   8  -3   29.68    0.83
  -1  -8   3   29.68    0.80
   1   8  -2  291.29    2.91
   1   8  -2  273.41    4.13
  -1  -8   2  275.89    3.84
  -1  -8   2  289.40    2.97
  -1  -8   1  200.37    3.08
   1   8  -1  191.26    3.47
   1   8  -1  188.71    2.70
  -1  -8   1  187.78    3.43
  -1  -8   1  188.91    3.00
   1   8   0  555.08    5.16
  -1  -8   0  554.70    5.05
  -1  -8   0  576.26    6.26
  -1  -8   0  572.38    6.28
  -1  -8  -1  402.37    4.60
   1   8   1  395.87    4.79
  -1  -8  -1  398.47    5.50
   1   8   2 1010.56    8.26
  -1  -8  -2 1009.27    9.11
  -1  -8  -2 1008.51    8.53
  -1  -8  -3  238.17    4.65
   1   8   3  220.95    4.21
  -1  -8  -3  223.65    5.62
  -1  -8  -3  241.03    5.25
  -1  -8  -4   92.16    4.32
  -1  -8  -4   90.22    4.72
  -1  -8  -4   90.85    3.33
   1   8   4   82.92    3.15
  -1  -8  -5  106.41    5.71
   1   8   5  109.92    3.41
  -1  -8  -5  116.90    4.88
  -1  -8  -5  111.37    3.54
   1   8   6   37.24    2.46
  -1  -8  -6   33.09    4.28
  -1  -8  -6   42.92    2.56
  -1  -8  -6   41.13    3.77
   1   8   7  458.37    7.34
  -1  -8  -7  437.31    7.22
  -1  -8  -7  462.29   10.17
  -1  -8  -8   10.20    1.64
  -1  -8  -8   15.32    2.67
   1   8   8    9.30    1.55
  -1  -8  -8    7.63    4.46
  -1  -8  -9  232.86    8.04
   1   8   9  219.56    5.68
  -1  -8  -9  213.74    5.67
   1   8  10   25.02    2.60
  -1  -8 -10   23.09    3.84
   1   8  11    0.99    1.48
  -1  -8 -11   -0.85    1.48
  -1  -8 -12    9.38    2.25
   1   8  12    9.18    2.00
  -1  -8 -12    3.24    2.71
   1   8  13    4.49    1.81
  -1  -8 -13    5.42    2.71
  -1  -8 -13    3.86    1.64
  -1  -8 -14  177.95    8.82
   1   8  14  176.90    6.11
  -1  -8 -14  178.42    5.92
  -1  -8 -15    6.80    1.96
   1   8  15    6.28    2.00
  -1  -8 -15    7.91    3.22
  -1  -8 -16   37.24    3.30
   1   8  16   40.01    3.50
  -1  -8 -16   31.84    4.95
   1   8  17    2.55    1.87
  -1  -8 -17   -0.40    3.06
  -1  -8 -17    0.70    1.89
   1   8  18    1.54    1.96
  -1  -8 -18   -3.07    3.31
  -1  -8 -18   -3.05    2.14
   1   8  19   -0.62    2.14
  -1  -8 -19    3.50    3.59
  -1  -8 -19    4.79    2.30
   1   9 -28    4.97    4.50
   1   9 -28    1.91    5.20
  -1  -9  28    3.81    1.81
  -1  -9  27    2.80    1.63
   1   9 -27    1.53    5.09
  -1  -9  27   -0.54    5.60
   1   9 -27   -1.51    3.73
  -1  -9  26   33.10    2.67
  -1  -9  26   21.15    6.70
   1   9 -26   39.75    6.91
   1   9 -26   38.71    5.82
  -1  -9  25    3.52    5.43
  -1  -9  25    3.30    1.42
   1   9 -25    9.52    5.17
  -1  -9  24    6.49    1.53
   1   9 -24    2.73    4.25
  -1  -9  23    3.20    1.32
   1   9 -23    0.77    4.02
  -1  -9  23    4.12    5.88
  -1  -9  22    4.84    1.30
   1   9 -22    6.66    4.40
  -1  -9  21   21.85    6.79
   1   9 -21   20.19    4.67
  -1  -9  21   22.36    1.94
   1   9 -20  137.07    8.56
  -1  -9  20  132.05   11.44
  -1  -9  20  127.42    3.89
  -1  -9  19    6.07    1.34
   1   9 -19    0.94    3.11
  -1  -9  18   95.21    3.31
  -1  -9  18   97.93   10.49
  -1  -9  17   82.06    3.07
  -1  -9  17   96.67   10.51
  -1  -9  16    7.35    1.31
  -1  -9  16    8.85    6.18
  -1  -9  15   32.99    2.22
  -1  -9  15   35.32    8.14
  -1  -9  14   18.88    1.68
   1   9 -14   17.32    7.16
   1   9 -14   19.62    3.05
   1   9 -13  180.47    6.56
  -1  -9  13  167.45    4.17
  -1  -9  12   78.79    2.95
   1   9 -12   79.10   10.04
   1   9 -12   86.79    4.40
   1   9 -11   77.91    3.85
  -1  -9  11   68.11    2.71
   1   9 -10  138.46    4.36
  -1  -9  10  143.05    3.79
  -1  -9   9  168.14    4.05
   1   9  -9  161.35    4.03
   1   9  -8   99.55    2.71
   1   9  -8  100.50    1.89
  -1  -9   8   95.88    3.07
   1   9  -7  149.19    1.98
   1   9  -7  151.95    2.53
   1   9  -7  145.89    4.62
  -1  -9   7  149.16    3.64
   1   9  -7  153.28    1.92
   1   9  -6  196.08    2.05
   1   9  -6  182.59    1.60
  -1  -9   6  192.99    4.00
   1   9  -6  179.63    2.00
   1   9  -5   10.48    0.53
  -1  -9   5   10.44    1.15
  -1  -9   4    5.13    1.01
  -1  -9   4    5.77    0.41
  -1  -9   4    4.01    0.84
   1   9  -4    6.36    0.62
  -1  -9   3   68.25    1.56
  -1  -9   3   68.21    1.35
  -1  -9   3   66.07    2.17
   1   9  -3   64.39    1.22
  -1  -9   2   98.90    2.34
  -1  -9   2  101.53    1.97
   1   9  -2  105.77    2.70
   1   9  -2  101.60    2.54
   1   9  -2  102.29    1.83
  -1  -9   1   18.77    1.38
   1   9  -1   20.30    1.04
  -1  -9   1   19.12    1.14
  -1  -9   1   18.77    1.12
  -1  -9   0   53.24    2.16
   1   9   0   54.06    1.76
  -1  -9   0   59.66    2.24
  -1  -9   0   56.99    1.76
   1   9   1   39.84    1.85
  -1  -9  -1   39.07    1.71
  -1  -9  -1   41.32    2.28
  -1  -9  -1   40.20    2.17
  -1  -9  -2    1.72    1.15
  -1  -9  -2    4.18    1.45
   1   9   2    2.25    0.88
  -1  -9  -2    1.61    0.95
   1   9   3  573.96    6.90
  -1  -9  -3  586.02    8.32
  -1  -9  -3  599.82    9.30
  -1  -9  -4    3.01    1.84
  -1  -9  -4    7.19    1.46
   1   9   4    4.43    1.14
  -1  -9  -4    5.33    2.12
  -1  -9  -5  229.01    8.13
  -1  -9  -5  242.29    6.87
   1   9   5  245.93    5.03
  -1  -9  -6   30.14    3.30
  -1  -9  -6   28.55    2.42
   1   9   6   28.91    2.11
  -1  -9  -6   20.67    3.94
  -1  -9  -7   39.31    3.60
   1   9   7   33.26    2.41
  -1  -9  -7   37.68    2.56
   1   9   8   64.35    3.16
  -1  -9  -8   59.92    4.38
  -1  -9  -8   57.72    3.03
   1   9   9   13.37    1.85
  -1  -9  -9   12.37    2.74
  -1  -9  -9   12.69    1.96
  -1  -9 -10    4.51    2.40
  -1  -9 -10    6.07    1.76
   1   9  10    3.28    1.52
   1   9  11    0.02    1.32
  -1  -9 -11   -0.29    2.35
  -1  -9 -11   -0.39    1.58
   1   9  12   -0.49    1.49
  -1  -9 -12    0.12    1.54
  -1  -9 -13    1.26    1.70
   1   9  13    1.10    1.58
  -1  -9 -13    3.18    2.88
  -1  -9 -14    5.07    1.96
   1   9  14    4.84    1.80
  -1  -9 -14    4.63    3.07
   1   9  15    1.37    1.79
  -1  -9 -15    2.81    3.03
  -1  -9 -15    2.50    1.94
   1   9  16   -1.20    1.89
  -1  -9 -16    0.22    3.10
  -1  -9 -16    2.48    2.09
  -1  -9 -17    4.93    2.26
   1   9  17    7.91    2.39
  -1  -9 -17   11.17    4.02
  -1  -9 -18    3.62    3.70
   1   9  18    5.40    2.39
  -1  -9 -18    4.13    2.41
   1   9  19    6.53    2.72
  -1  -9 -19   26.61    3.46
   1  10 -28   24.98    5.38
  -1 -10  28   22.27    7.19
   1  10 -28   25.67    6.36
  -1 -10  28   17.13    2.28
   1  10 -27    2.44    5.04
  -1 -10  27    3.24    5.93
   1  10 -27   -1.22    3.64
  -1 -10  27    2.27    1.54
  -1 -10  26    0.90    1.29
  -1 -10  26    7.25    6.30
   1  10 -26   -1.12    4.79
  -1 -10  25   59.25    9.24
  -1 -10  25   56.53    3.15
   1  10 -25   71.26    8.15
   1  10 -24    8.56    4.80
  -1 -10  24    5.46    6.40
  -1 -10  24    4.45    1.38
  -1 -10  23   81.35    3.53
  -1 -10  23   71.13   10.01
   1  10 -23   74.39    7.22
  -1 -10  22   14.88    1.68
   1  10 -22   18.08    4.96
  -1 -10  22   14.03    6.58
  -1 -10  21   27.03    2.16
   1  10 -21   29.61    5.26
   1  10 -20   66.18    6.61
  -1 -10  20   62.53    2.93
  -1 -10  19    4.43    1.12
   1  10 -19    3.28    3.18
  -1 -10  19   -3.02    6.14
  -1 -10  18  131.01    3.97
   1  10 -18  141.83    7.63
  -1 -10  18  140.66   12.22
  -1 -10  17   61.58    2.84
   1  10 -17   59.32    5.09
  -1 -10  16  201.91   14.06
  -1 -10  16  209.67    4.98
   1  10 -16  202.81    8.17
  -1 -10  15  147.80    4.23
   1  10 -15  151.30    6.74
   1  10 -14  204.65   16.03
  -1 -10  14  194.99    4.71
   1  10 -14  195.77    7.07
  -1 -10  13   48.29    2.48
   1  10 -13   44.81    3.48
  -1 -10  12   55.26    2.67
   1  10 -12   52.59    3.45
  -1 -10  11  332.60    6.03
   1  10 -11  335.51    6.98
   1  10 -10   20.48    1.76
  -1 -10  10   20.27    1.82
  -1 -10   9  672.54    8.38
   1  10  -9  690.43    7.32
  -1 -10   8   48.25    2.33
   1  10  -8   47.65    1.21
   1  10  -8   49.15    1.61
   1  10  -7  237.70    2.03
   1  10  -7  247.19    2.47
   1  10  -7  265.25    2.64
   1  10  -7  235.01    6.17
  -1 -10   7  258.69    4.97
  -1 -10   6   58.98    2.38
   1  10  -6   53.20    1.16
  -1 -10   5 1255.62   11.18
  -1 -10   5 1269.43    4.94
  -1 -10   5 1261.45   10.32
   1  10  -4  451.74    4.54
  -1 -10   4  457.65    6.22
  -1 -10   3  461.50    5.68
   1  10  -3  441.17    5.60
  -1 -10   3  430.40    4.08
   1  10  -3  472.47    3.39
  -1 -10   3  461.22    3.85
   1  10  -2  562.52    4.42
  -1 -10   2  563.58    5.79
   1  10  -2  569.84    6.31
  -1 -10   2  560.50    5.48
  -1 -10   2  548.40    6.31
  -1 -10   1    0.54    0.65
   1  10  -1    1.92    0.72
  -1 -10   1    0.39    0.70
  -1 -10   0  925.19    8.92
  -1 -10   0  942.57    7.19
  -1 -10   0  943.77    8.52
  -1 -10  -1  152.73    3.19
   1  10   1  156.78    3.25
  -1 -10  -1  164.14    4.04
  -1 -10  -2  662.27    7.59
   1  10   2  670.56    7.13
  -1 -10  -2  685.15    8.23
   1  10   3   48.33    2.12
  -1 -10  -3   48.76    2.71
  -1 -10  -3   53.18    2.58
  -1 -10  -3   55.76    3.19
  -1 -10  -4  120.64    3.85
  -1 -10  -4  122.88    4.83
   1  10   4  116.12    3.42
  -1 -10  -4  110.20    5.13
  -1 -10  -5   87.05    3.60
   1  10   5   88.19    3.29
  -1 -10  -5   81.05    4.29
  -1 -10  -6   11.10    2.48
  -1 -10  -6    5.90    3.31
   1  10   6    7.54    1.69
  -1 -10  -6   14.52    1.94
   1  10   7  434.39    7.54
  -1 -10  -7  437.02    7.93
  -1 -10  -7  433.84   10.19
  -1 -10  -8   14.11    1.98
   1  10   8   17.73    2.00
   1  10   9  170.54    5.25
  -1 -10  -9  164.48    5.17
  -1 -10 -10   27.38    2.64
  -1 -10 -10   24.21    3.50
   1  10  10   25.19    2.39
  -1 -10 -11    3.15    1.65
   1  10  11    5.12    1.75
  -1 -10 -11    0.66    2.34
   1  10  12    6.61    1.77
  -1 -10 -12    5.90    3.04
  -1 -10 -12    7.84    1.91
   1  10  13   18.41    2.52
  -1 -10 -13   22.96    2.66
  -1 -10 -14   65.17    5.74
  -1 -10 -14   65.40    4.12
   1  10  14   64.56    4.00
  -1 -10 -15   44.43    3.63
  -1 -10 -15   43.09    5.18
  -1 -10 -16    9.15    2.37
   1  10  16    6.18    2.25
  -1 -10 -16    7.43    3.86
   1  10  17    3.01    2.07
  -1 -10 -17    1.26    2.08
  -1 -10 -17    0.67    3.75
  -1 -10 -18    3.40    2.33
  -1 -10 -18    3.58    3.47
   1  11 -29    0.42    5.51
   1  11 -28   13.84    6.11
   1  11 -28    8.92    4.54
  -1 -11  28    3.21    1.55
  -1 -11  28    7.17    6.84
   1  11 -27   43.37    7.26
  -1 -11  27   45.43    3.06
  -1 -11  27   34.12    8.40
   1  11 -27   40.82    6.01
   1  11 -26   25.79    6.11
  -1 -11  26   25.83    8.20
  -1 -11  26   35.87    2.62
  -1 -11  25   -3.10    6.78
   1  11 -25    7.42    4.99
  -1 -11  25    0.26    1.26
   1  11 -24    0.46    3.91
  -1 -11  24    2.37    6.42
  -1 -11  24   -1.03    1.26
   1  11 -23    5.52    3.86
  -1 -11  23    8.27    6.95
  -1 -11  23    1.66    1.13
  -1 -11  22    5.57    6.62
  -1 -11  22    1.80    1.13
   1  11 -22    1.50    3.61
  -1 -11  21    2.59    7.11
   1  11 -21    8.23    3.83
  -1 -11  21   -0.27    1.10
  -1 -11  20   17.92    1.84
   1  11 -20   19.66    3.93
  -1 -11  19   -1.05    6.06
   1  11 -19   -3.15    3.25
  -1 -11  19    1.97    1.18
   1  11 -18    1.92    2.67
  -1 -11  18    3.52    1.33
  -1 -11  17    1.69    1.28
   1  11 -17    0.81    2.38
  -1 -11  17    6.53    6.53
   1  11 -16    5.86    6.73
  -1 -11  16    6.82    1.48
   1  11 -16    6.97    2.69
  -1 -11  15   34.81    2.30
   1  11 -15   41.67    3.82
   1  11 -14   15.81    2.55
   1  11 -14   17.01    7.75
  -1 -11  14   15.18    1.70
   1  11 -13  119.09    4.88
  -1 -11  13  110.99    3.76
  -1 -11  12    1.58    1.14
   1  11 -12    1.74    1.41
  -1 -11  11   51.36    2.61
   1  11 -11   52.99    2.62
  -1 -11  10   40.61    2.34
   1  11 -10   44.36    2.10
  -1 -11   9   12.58    1.50
   1  11  -9   13.65    1.03
   1  11  -9   12.52    0.74
   1  11  -8    1.36    0.43
  -1 -11   8    0.72    0.83
   1  11  -8   -0.62    1.38
   1  11  -8    0.84    0.33
   1  11  -8    0.31    0.25
   1  11  -7  353.76    3.16
  -1 -11   7  360.09    6.05
  -1 -11   6    4.88    1.21
  -1 -11   6    6.10    1.13
   1  11  -6    5.23    0.53
  -1 -11   5  322.09    2.80
  -1 -11   5  310.52    5.45
   1  11  -5  317.84    3.72
  -1 -11   4    4.33    0.42
   1  11  -4    6.14    0.91
  -1 -11   4    5.94    0.55
   1  11  -4    4.86    0.33
  -1 -11   3  300.57    4.83
  -1 -11   3  303.80    3.42
   1  11  -3  289.72    4.71
  -1 -11   3  301.55    4.62
   1  11  -3  308.60    4.71
  -1 -11   3  291.77    3.64
   1  11  -3  306.37    2.83
  -1 -11   2  226.76    4.41
   1  11  -2  233.75    2.97
  -1 -11   2  231.65    3.86
  -1 -11   2  240.29    3.49
  -1 -11   1   18.99    1.57
  -1 -11   1   23.47    1.57
   1  11  -1   19.92    1.28
   1  11   0   73.67    2.17
  -1 -11   0   76.36    2.61
  -1 -11   0   77.48    2.85
  -1 -11   0   71.10    2.16
  -1 -11  -1   69.60    2.88
   1  11   1   65.77    2.23
  -1 -11  -1   65.45    2.29
  -1 -11  -1   63.40    2.79
  -1 -11  -2   37.82    2.23
  -1 -11  -2   38.83    2.08
   1  11   2   43.20    1.94
  -1 -11  -3   19.76    2.08
   1  11   3   18.01    1.48
  -1 -11  -3   15.69    1.74
  -1 -11  -3   14.80    1.86
  -1 -11  -4    8.65    2.03
  -1 -11  -4    4.01    2.34
   1  11   4    9.15    1.45
  -1 -11  -4    9.67    1.61
  -1 -11  -5    7.04    1.68
  -1 -11  -5    8.70    2.01
   1  11   5    4.56    1.36
  -1 -11  -5    6.34    2.65
  -1 -11  -6   12.37    2.53
  -1 -11  -6   10.25    3.87
   1  11   6   10.55    1.59
  -1 -11  -6    9.67    1.74
   1  11   7    1.89    1.40
  -1 -11  -7    3.00    2.18
  -1 -11  -7    2.64    1.57
   1  11   8   18.14    2.04
  -1 -11  -8   15.67    2.10
  -1 -11  -8   15.92    2.93
   1  11   9   11.13    1.82
  -1 -11  -9   12.26    2.00
  -1 -11  -9   17.03    3.17
  -1 -11 -10   10.29    2.13
  -1 -11 -10    8.21    2.94
   1  11  10   11.70    1.90
  -1 -11 -11   11.81    3.17
  -1 -11 -11    7.65    2.00
   1  11  11    9.02    1.85
   1  11  12   10.27    2.06
  -1 -11 -12    7.64    3.26
  -1 -11 -12   15.31    2.48
  -1 -11 -13   10.51    2.35
  -1 -11 -13   13.56    3.81
   1  11  13   12.99    2.31
  -1 -11 -14    2.97    1.92
  -1 -11 -14    7.06    3.48
   1  11  14    1.89    1.85
  -1 -11 -15    5.65    2.23
  -1 -11 -15    4.62    3.28
   1  11  15    4.47    2.06
   1  11  16   13.05    2.61
  -1 -11 -16   21.00    3.01
  -1 -11 -16   23.57    4.44
  -1 -11 -17    1.67    2.14
  -1 -11 -17    3.25    3.41
   1  12 -29   12.05    4.83
  -1 -12  29    5.96    7.00
  -1 -12  28   16.26    2.14
   1  12 -28   13.21    4.68
  -1 -12  28   11.42    7.61
   1  12 -28    9.97    5.56
  -1 -12  27   -0.64    1.34
   1  12 -27   -0.31    4.81
  -1 -12  27    3.20    6.53
  -1 -12  26    2.53    1.40
   1  12 -26    2.79    4.53
  -1 -12  26    2.01    7.11
   1  12 -25   57.67    7.13
  -1 -12  25   60.29    3.30
   1  12 -24    8.79    4.64
  -1 -12  24    2.94    1.39
  -1 -12  24    3.59    6.97
  -1 -12  23  117.81    4.16
  -1 -12  23  122.70   12.74
   1  12 -23  115.31    8.38
   1  12 -22    0.40    3.47
  -1 -12  22    4.23    1.45
  -1 -12  22    5.86    6.75
   1  12 -21  134.91    8.34
  -1 -12  21  139.01    4.32
  -1 -12  21  127.42   12.82
   1  12 -20  106.60    7.27
  -1 -12  20   92.16    3.68
  -1 -12  20   91.22   11.65
   1  12 -19   49.83    5.25
  -1 -12  19   41.94    2.61
  -1 -12  19   45.51    8.90
  -1 -12  18  275.88    6.23
   1  12 -18  279.06    9.85
   1  12 -17   10.93    8.54
  -1 -12  17    4.73    7.28
   1  12 -17   -0.40    2.49
  -1 -12  17    1.37    1.30
   1  12 -16  186.38    7.14
  -1 -12  16  184.44    5.00
   1  12 -16  179.50   16.32
   1  12 -15   14.69    2.84
   1  12 -15   12.38    8.38
  -1 -12  15   11.84    1.74
  -1 -12  14  343.33    6.63
   1  12 -14  378.15    8.62
   1  12 -13   91.42    3.99
  -1 -12  13   78.19    3.31
   1  12 -12  341.78    6.47
  -1 -12  12  343.58    6.74
  -1 -12  11  258.66    5.79
   1  12 -11  276.93    5.05
  -1 -12  10  117.36    4.00
   1  12 -10  115.46    2.66
  -1 -12   9  732.69    9.30
   1  12  -9  709.66    4.60
   1  12  -8    3.91    0.52
  -1 -12   8    4.62    1.25
   1  12  -8    4.09    1.72
  -1 -12   7 1753.36   13.93
   1  12  -7 1743.41    7.53
  -1 -12   6   69.40    3.04
  -1 -12   6   69.68    1.33
   1  12  -6   72.40    1.81
  -1 -12   6   70.62    2.91
  -1 -12   5  648.34    8.21
  -1 -12   5  650.82    4.33
  -1 -12   5  644.69    8.11
   1  12  -5  633.17    5.99
  -1 -12   4  367.92    5.63
  -1 -12   4  375.24    5.54
   1  12  -4  381.30    5.68
  -1 -12   4  367.73    3.71
  -1 -12   3   52.91    2.28
  -1 -12   3   55.79    1.78
   1  12  -3   55.10    1.27
   1  12  -3   58.60    2.32
  -1 -12   3   55.15    2.03
  -1 -12   3   56.58    1.65
  -1 -12   2  627.48    7.59
   1  12  -2  637.20    5.02
  -1 -12   1  206.89    4.61
   1  12  -1  196.73    3.25
  -1 -12   1  202.02    3.64
  -1 -12   1  206.98    3.92
  -1 -12   0  353.79    6.10
  -1 -12   0  377.56    4.98
  -1 -12   0  372.17    5.60
   1  12   0  351.44    4.67
  -1 -12  -1   33.86    2.50
   1  12   1   27.99    1.90
  -1 -12  -1   31.97    1.92
  -1 -12  -1   38.20    2.51
  -1 -12  -2  185.29    4.89
  -1 -12  -2  196.82    5.15
   1  12   2  186.12    4.01
   1  12   3   67.22    2.66
  -1 -12  -3   68.33    3.52
  -1 -12  -3   71.26    3.21
  -1 -12  -4  234.30    6.40
   1  12   4  221.85    4.82
  -1 -12  -4  211.08    7.22
  -1 -12  -4  219.03    5.45
   1  12   5   45.16    2.52
  -1 -12  -5   44.86    2.81
  -1 -12  -6   39.85    3.25
   1  12   6   42.49    2.53
  -1 -12  -6   43.38    2.90
  -1 -12  -7  298.20    8.44
  -1 -12  -7  276.37    6.77
   1  12   7  287.47    6.32
  -1 -12  -8    1.70    2.02
   1  12   8    4.09    1.41
  -1 -12  -8    5.90    1.91
  -1 -12  -9  147.41    6.89
   1  12   9  141.48    4.92
  -1 -12  -9  140.25    5.20
   1  12  10    1.03    1.49
  -1 -12 -10    5.43    2.72
  -1 -12 -10    0.83    1.75
  -1 -12 -11   41.42    4.43
  -1 -12 -11   40.11    3.32
   1  12  11   42.13    3.12
   1  12  12   60.29    3.78
  -1 -12 -12   69.13    5.34
  -1 -12 -12   62.34    4.02
   1  12  13   18.87    2.59
  -1 -12 -13   15.23    2.74
  -1 -12 -13   15.70    3.53
  -1 -12 -14   21.87    4.01
  -1 -12 -14   21.88    3.06
   1  12  14   22.41    2.84
  -1 -12 -15    2.57    2.32
  -1 -12 -15    1.84    3.02
   1  12  15    1.13    1.99
  -1 -12 -16    0.59    2.36
  -1 -12 -16   -1.80    2.96
  -1 -13  29   -0.65    7.14
  -1 -13  28    1.50    1.43
   1  13 -28    1.72    3.92
   1  13 -27   15.01    5.52
  -1 -13  27   27.48    2.48
  -1 -13  27   23.87    8.28
   1  13 -26    5.44    4.75
  -1 -13  26    2.76    6.81
  -1 -13  26    4.33    1.57
  -1 -13  25   -1.24    1.33
   1  13 -25    4.04    4.20
   1  13 -24    4.20    3.96
  -1 -13  24    6.93    1.46
   1  13 -23    2.53    3.61
  -1 -13  23   -0.09    6.58
  -1 -13  23    3.60    1.38
   1  13 -22   28.53    4.95
  -1 -13  22   21.59    1.99
   1  13 -21    2.83    3.45
  -1 -13  21    0.71    1.26
  -1 -13  21   -0.17    6.95
  -1 -13  20    3.22    1.46
   1  13 -20    6.24    3.50
  -1 -13  19    4.76    1.65
  -1 -13  19    2.32    7.19
   1  13 -19    2.27    2.77
  -1 -13  18    1.52    1.28
   1  13 -18    7.44    8.83
   1  13 -18    5.62    3.00
  -1 -13  18   10.35    8.03
  -1 -13  17    9.83    1.83
   1  13 -17    7.06    2.85
  -1 -13  16   78.23    3.51
   1  13 -16   70.56    4.59
   1  13 -15    2.12    1.82
  -1 -13  15    3.15    1.34
   1  13 -15    4.38    7.46
   1  13 -14   66.96    3.50
  -1 -13  14   56.40    3.06
  -1 -13  13    4.28    1.34
   1  13 -13    1.03    1.29
   1  13 -12   52.19    2.44
  -1 -13  12   57.82    3.00
   1  13 -11   91.97    2.51
  -1 -13  11   86.27    3.56
   1  13 -10   60.10    1.43
  -1 -13  10   61.58    3.05
  -1 -13   9  120.15    4.04
   1  13  -9  122.29    5.32
   1  13  -8   17.81    0.89
   1  13  -8   17.06    2.38
  -1 -13   8   18.70    1.75
  -1 -13   7   70.99    3.09
  -1 -13   7   65.83    3.15
   1  13  -7   66.13    1.71
  -1 -13   6   26.02    2.22
  -1 -13   6   24.68    1.98
   1  13  -6   26.62    1.48
  -1 -13   6   25.53    0.95
  -1 -13   5    1.68    0.96
   1  13  -5    0.18    0.81
  -1 -13   5    1.60    0.43
  -1 -13   5    1.35    1.09
  -1 -13   4    0.81    0.39
  -1 -13   4    2.98    0.58
   1  13  -4    2.47    0.94
   1  13  -4    2.86    0.97
  -1 -13   4    2.43    0.99
  -1 -13   4    2.78    0.97
   1  13  -3  102.79    1.74
  -1 -13   3  104.96    2.90
  -1 -13   3  105.33    2.39
  -1 -13   3  106.96    3.27
   1  13  -2    3.22    0.60
  -1 -13   2    5.12    1.17
  -1 -13   2    5.08    0.85
  -1 -13   2    3.29    0.80
  -1 -13   1   52.65    1.99
  -1 -13   1   54.50    2.61
  -1 -13   1   58.35    2.25
   1  13  -1   52.52    1.75
  -1 -13   0  146.18    3.33
   1  13   0  151.14    3.17
  -1 -13   0  162.62    3.87
  -1 -13   0  158.01    4.34
   1  13   1    6.20    1.00
  -1 -13  -1    4.86    1.28
  -1 -13  -1    5.32    1.31
  -1 -13  -1    5.68    1.07
  -1 -13  -2  275.61    6.01
  -1 -13  -2  277.09    5.74
   1  13   2  263.40    4.87
  -1 -13  -3   -1.38    1.71
   1  13   3    2.48    1.00
  -1 -13  -3    1.15    1.27
  -1 -13  -3   -0.44    1.18
   1  13   4   78.29    3.05
  -1 -13  -4   79.83    3.58
  -1 -13  -4   84.54    4.03
   1  13   5   86.92    3.39
  -1 -13  -5   86.61    3.88
  -1 -13  -5   94.29    4.66
   1  13   6   12.91    1.73
  -1 -13  -6   15.11    2.04
  -1 -13  -6   15.46    2.51
  -1 -13  -7  120.93    4.82
   1  13   7  130.22    4.43
  -1 -13  -7  131.31    5.83
   1  13   8    7.65    1.63
  -1 -13  -8    6.76    1.92
  -1 -13  -8   12.38    2.58
  -1 -13  -9   25.00    2.69
   1  13   9   16.53    2.07
  -1 -13  -9   20.14    3.06
  -1 -13 -10   12.58    2.26
  -1 -13 -10   12.82    2.89
   1  13  10   12.29    2.03
  -1 -13 -11   20.60    2.77
  -1 -13 -11   21.08    3.69
   1  13  11   23.40    2.61
  -1 -13 -12   12.57    2.32
   1  13  12    8.68    1.99
  -1 -13 -12    8.20    2.79
  -1 -13 -13    8.23    3.20
   1  13  13    7.35    2.01
  -1 -13 -13    9.74    2.35
  -1 -13 -14    0.44    2.93
   1  13  14    0.45    1.73
  -1 -13 -14    1.57    2.02
  -1 -13 -15    4.89    3.31
  -1 -13 -15   -2.03    2.15
  -1 -13 -16   22.13    4.38
  -1 -13 -16   11.20    6.35
  -1 -14  28   10.07    7.92
  -1 -14  27   21.91    8.55
  -1 -14  27   23.35    2.43
  -1 -14  26    4.07    1.48
  -1 -14  26    5.04    7.31
  -1 -14  25   84.93   11.73
  -1 -14  25   60.84    3.26
   1  14 -24   19.02    4.60
  -1 -14  24    7.55    1.66
  -1 -14  24    8.81    8.84
  -1 -14  23   66.15    3.31
   1  14 -23   71.56    6.64
  -1 -14  23   58.06   10.72
  -1 -14  22   -3.02    7.24
  -1 -14  22    0.69    1.23
   1  14 -22    1.79    3.42
   1  14 -21  115.89    7.19
  -1 -14  21   99.92    4.07
  -1 -14  21  111.72   13.26
   1  14 -20   90.81    6.11
  -1 -14  20   95.22    4.04
  -1 -14  19   46.10   10.25
   1  14 -19   31.27    3.93
   1  14 -19   32.29    9.74
  -1 -14  19   30.84    2.38
  -1 -14  18  134.24    4.64
   1  14 -18  146.39    6.81
   1  14 -18  141.67   16.39
   1  14 -17  296.76   22.11
  -1 -14  17  304.16    6.84
   1  14 -16  335.75    8.19
  -1 -14  16  296.53    6.73
   1  14 -15   35.08    2.90
  -1 -14  15   31.05    2.45
  -1 -14  14  302.68    6.88
   1  14 -14  341.22    6.90
  -1 -14  13  189.34    5.47
   1  14 -13  194.08    4.51
   1  14 -12  568.16    6.20
  -1 -14  12  531.18    8.89
  -1 -14  11  189.13    5.37
   1  14 -11  170.66    2.40
  -1 -14  10   73.52    3.33
   1  14  -9  402.78    9.85
  -1 -14   9  402.54    7.63
  -1 -14   8   52.81    3.05
  -1 -14   8   55.97    2.92
  -1 -14   7  738.17    9.91
  -1 -14   7  674.75    9.56
  -1 -14   6   92.10    3.44
  -1 -14   6   84.33    1.75
  -1 -14   6   94.72    3.83
  -1 -14   5  147.89    3.93
  -1 -14   5  142.00    4.37
  -1 -14   5  141.97    3.63
  -1 -14   5  149.07    2.43
   1  14  -5  143.24    3.62
  -1 -14   4  387.99    4.34
  -1 -14   4  364.82    6.10
  -1 -14   4  302.97    4.09
  -1 -14   4  329.43    5.10
  -1 -14   3   76.40    2.62
  -1 -14   3   73.36    2.87
  -1 -14   3   79.39    2.25
  -1 -14   2  236.55    4.30
  -1 -14   2  233.96    4.07
   1  14  -2  228.77    3.15
  -1 -14   1  186.92    3.79
  -1 -14   1  188.07    4.06
  -1 -14   1  195.88    4.98
   1  14  -1  185.89    3.32
  -1 -14   0  219.90    4.22
  -1 -14   0  213.83    5.18
   1  14   0  221.12    3.85
  -1 -14  -1   10.21    1.73
  -1 -14  -1    7.81    1.35
   1  14   1    8.64    1.24
   1  14   2  328.87    5.39
  -1 -14  -2  320.07    6.75
  -1 -14  -3   12.27    1.85
  -1 -14  -3   10.44    1.75
   1  14   3   10.45    1.29
  -1 -14  -4  203.17    5.72
  -1 -14  -4  201.36    6.13
   1  14   4  185.57    4.65
  -1 -14  -5   88.49    4.05
   1  14   5   85.03    3.46
  -1 -14  -5   82.93    4.29
   1  14   6    6.04    1.54
  -1 -14  -6    6.24    2.02
  -1 -14  -6    6.65    1.70
   1  14   7   95.28    3.95
  -1 -14  -7   95.19    5.19
  -1 -14  -7   87.57    4.31
   1  14   8   21.26    2.25
  -1 -14  -8   18.17    2.96
  -1 -14  -8   23.41    2.58
   1  14   9   23.69    2.41
  -1 -14  -9   27.24    3.59
  -1 -14  -9   25.31    2.83
   1  14  10    1.45    1.48
  -1 -14 -10   -1.70    2.38
  -1 -14 -10    0.84    1.83
  -1 -14 -11    9.63    3.00
   1  14  11    9.41    1.87
  -1 -14 -11   11.22    2.49
   1  14  12    1.29    1.75
  -1 -14 -12    4.25    2.15
  -1 -14 -12    5.83    2.98
  -1 -14 -13   14.92    2.91
  -1 -14 -13   19.92    3.79
  -1 -14 -14   -2.30    3.04
  -1 -14 -14    0.56    2.28
  -1 -14 -15   -0.56    5.09
  -1 -14 -15    1.63    3.21
  -1 -15  28   13.36    9.01
  -1 -15  27    6.87    1.65
  -1 -15  27   11.01    8.46
  -1 -15  26    1.68    1.31
  -1 -15  26    5.46    8.32
  -1 -15  25    6.70    1.60
  -1 -15  25   13.23    7.59
  -1 -15  24    3.85    7.64
  -1 -15  24    0.99    1.30
  -1 -15  23    7.19    8.00
  -1 -15  23   13.21    1.96
  -1 -15  22    3.39    7.92
  -1 -15  22    1.69    1.35
  -1 -15  21   14.09    8.40
  -1 -15  21   14.71    1.97
  -1 -15  20   15.34    1.99
   1  15 -20   13.79    9.27
  -1 -15  20   15.30    8.18
  -1 -15  19    9.27    8.30
  -1 -15  19    5.97    1.62
   1  15 -19   13.77   10.07
  -1 -15  18  214.72    5.96
   1  15 -18  185.70   19.08
  -1 -15  17   15.59    2.12
   1  15 -17   18.77    2.52
   1  15 -17   13.91    8.55
   1  15 -16  138.47    5.11
  -1 -15  16  133.19    4.84
  -1 -15  15    5.76    1.53
  -1 -15  14   54.31    3.22
  -1 -15  13   34.62    2.69
  -1 -15  12  170.11    5.29
  -1 -15  11   47.05    2.99
  -1 -15  10    8.00    1.62
  -1 -15   9   19.25    2.21
   1  15  -9   17.99    2.82
  -1 -15   9   16.41    1.93
  -1 -15   8    4.50    1.32
  -1 -15   8    7.73    1.60
  -1 -15   7    7.91    1.53
  -1 -15   7    6.93    1.51
  -1 -15   6   24.24    2.11
  -1 -15   6   22.69    1.70
   1  15  -6   20.35    1.80
   1  15  -6   25.01    2.17
  -1 -15   6   25.79    2.29
  -1 -15   6   23.70    1.09
  -1 -15   5    6.69    0.78
  -1 -15   5    8.62    1.71
  -1 -15   5    6.67    1.35
   1  15  -5    6.92    1.25
   1  15  -5    6.91    1.26
  -1 -15   5    5.67    1.25
  -1 -15   4   80.37    2.25
  -1 -15   4   81.83    2.88
  -1 -15   4   80.28    3.19
  -1 -15   3   50.83    2.54
  -1 -15   3   54.79    2.21
  -1 -15   3   53.58    2.58
  -1 -15   3   54.82    1.94
  -1 -15   2   67.49    2.35
  -1 -15   2   69.72    3.06
  -1 -15   2   69.12    2.43
  -1 -15   1   42.99    2.03
  -1 -15   1   39.61    2.08
   1  15  -1   40.51    1.64
  -1 -15   1   42.39    2.58
  -1 -15   0   37.64    2.63
   1  15   0   36.21    1.70
  -1 -15   0   38.46    2.21
  -1 -15  -1    3.32    1.24
   1  15   1    1.33    0.83
  -1 -15  -1    0.64    1.27
   1  15   2  259.95    4.86
  -1 -15  -2  267.51    6.06
  -1 -15  -2  248.26    6.15
  -1 -15  -3    8.50    1.81
  -1 -15  -3   13.04    1.98
   1  15   3   13.39    1.44
  -1 -15  -4  128.49    4.82
  -1 -15  -4  120.56    4.61
   1  15   4  117.53    3.73
   1  15   5   41.66    2.56
  -1 -15  -5   42.05    3.22
  -1 -15  -5   48.54    3.34
  -1 -15  -6    1.18    1.70
  -1 -15  -6   -1.51    1.77
   1  15   6    0.01    1.11
   1  15   7   53.21    3.06
  -1 -15  -7   53.96    4.06
  -1 -15  -7   60.66    3.82
  -1 -15  -8    7.57    2.43
   1  15   8    7.02    1.62
  -1 -15  -8    4.94    2.07
   1  15   9    4.71    1.67
  -1 -15  -9    6.24    2.13
  -1 -15  -9    6.98    2.51
  -1 -15 -10   12.60    3.03
   1  15  10   11.34    1.93
  -1 -15 -10   10.11    2.54
  -1 -15 -11    1.33    2.21
  -1 -15 -11    3.22    2.47
  -1 -15 -12   23.51    3.23
  -1 -15 -12   27.95    3.96
  -1 -15 -13    2.69    3.00
  -1 -15 -13    2.20    2.33
  -1 -15 -13    9.37    5.83
  -1 -15 -14    3.92    3.14
  -1 -15 -14   -0.51    5.00
  -1 -16  28   15.94    8.97
  -1 -16  27   32.98   10.00
  -1 -16  26   38.80   10.82
  -1 -16  26   24.68    2.45
  -1 -16  25   20.95    2.26
  -1 -16  25   11.35    9.27
  -1 -16  24   12.91    8.43
  -1 -16  24   10.11    1.87
  -1 -16  23   90.31    4.12
  -1 -16  23  110.43   14.74
  -1 -16  22   -1.87    8.78
  -1 -16  22    0.20    1.37
  -1 -16  21   96.46   13.56
  -1 -16  21   90.98    4.17
   1  16 -20   21.10   10.75
  -1 -16  20   19.94    2.28
  -1 -16  20   16.36    7.98
  -1 -16  19   27.66    2.55
   1  16 -19    4.57    9.28
   1  16 -18  129.66   16.13
  -1 -16  18  169.58    5.47
  -1 -16  17   46.30    3.10
   1  16 -17   47.49   11.97
  -1 -16  16  160.64    5.44
  -1 -16  15    6.38    1.52
  -1 -16  14  214.93    6.20
  -1 -16  13   48.42    3.10
  -1 -16  12  485.19    9.22
  -1 -16  11   39.35    2.77
   1  16 -10   89.60    5.61
  -1 -16  10   94.18    4.11
  -1 -16   9  147.07    4.89
   1  16  -9  142.94    6.55
  -1 -16   8  252.28    6.20
  -1 -16   8  241.81    6.27
  -1 -16   7  479.37    7.98
   1  16  -7  474.24    6.96
   1  16  -6   77.63    2.92
  -1 -16   6   75.85    1.82
   1  16  -6   77.99    2.88
  -1 -16   6   72.90    3.13
  -1 -16   6   76.33    3.62
  -1 -16   6   81.44    3.04
  -1 -16   5  162.34    4.33
  -1 -16   5  171.84    3.00
  -1 -16   5  168.53    5.17
  -1 -16   4   27.28    1.45
  -1 -16   4   27.69    1.85
  -1 -16   4   27.68    2.20
  -1 -16   3  467.57    7.60
  -1 -16   3  463.14    6.33
  -1 -16   2   60.20    2.95
  -1 -16   2   60.13    2.36
  -1 -16   2   63.03    2.39
  -1 -16   1   57.09    3.09
  -1 -16   1   57.02    2.51
  -1 -16   1   52.26    2.26
  -1 -16   0   54.72    3.09
  -1 -16   0   55.35    2.67
  -1 -16  -1   15.44    1.87
   1  16   1   13.06    1.37
  -1 -16  -1   18.89    2.22
  -1 -16  -2  174.61    4.94
   1  16   2  171.85    3.99
  -1 -16  -3    1.77    1.37
  -1 -16  -3    3.51    1.73
   1  16   3    1.61    1.00
   1  16   4   49.53    2.54
  -1 -16  -4   49.07    3.17
  -1 -16  -4   50.84    3.33
  -1 -16  -5    1.90    1.82
   1  16   5    1.51    1.17
  -1 -16  -5    0.75    1.69
  -1 -16  -6   63.56    3.94
  -1 -16  -6   57.44    3.86
   1  16   6   54.41    3.06
   1  16   7   12.02    1.79
  -1 -16  -7   13.66    2.52
  -1 -16  -7   12.83    2.41
  -1 -16  -8   35.79    3.60
  -1 -16  -8   33.56    3.17
  -1 -16  -9   14.68    2.69
  -1 -16  -9   21.54    3.32
  -1 -16 -10    0.63    2.31
  -1 -16 -10    6.34    2.23
  -1 -16 -11   16.22    3.36
  -1 -16 -11   12.42    2.69
  -1 -16 -12    0.72    2.12
  -1 -16 -12    6.12    3.02
  -1 -16 -13   10.83    3.26
  -1 -17  27    8.10    8.23
  -1 -17  26    5.85    1.68
  -1 -17  26   11.23    9.00
  -1 -17  25    8.91    1.80
  -1 -17  25   23.35   10.30
  -1 -17  24   12.32    2.07
  -1 -17  24   24.42   10.08
  -1 -17  23   12.23    9.57
  -1 -17  23    8.09    1.86
  -1 -17  22    0.83    1.47
  -1 -17  22   -2.37    8.99
  -1 -17  21   -3.33    9.04
  -1 -17  21    3.52    1.67
   1  17 -21    9.78    9.23
   1  17 -20   15.68   11.13
  -1 -17  20    5.85    1.70
   1  17 -19   -4.56    9.71
  -1 -17  19    1.60    1.57
  -1 -17  18   28.22    2.65
   1  17 -18   38.39   12.03
  -1 -17  17   58.39    3.52
  -1 -17  16   12.60    2.17
  -1 -17  15    1.25    1.65
  -1 -17  14    7.26    1.87
  -1 -17  13   26.53    2.85
  -1 -17  12   88.56    4.27
  -1 -17  11   69.60    3.78
  -1 -17  10   28.32    2.97
  -1 -17  10   26.36    2.67
   1  17 -10   29.27    3.93
  -1 -17   9  269.90    6.88
   1  17  -9  264.50    9.08
  -1 -17   9  259.24    6.72
  -1 -17   8    3.01    1.08
  -1 -17   8    2.10    1.35
   1  17  -8    4.81    1.19
  -1 -17   8    4.20    1.41
   1  17  -7   88.84    3.22
  -1 -17   7   85.71    4.23
  -1 -17   7   83.73    3.60
  -1 -17   7   91.44    3.38
  -1 -17   6    9.58    1.63
  -1 -17   6   13.44    1.95
  -1 -17   6   11.29    2.00
   1  17  -6    9.90    1.44
  -1 -17   5   57.59    2.91
  -1 -17   5   60.34    2.67
  -1 -17   5   52.19    3.32
  -1 -17   4  233.35    5.60
  -1 -17   4  235.76    4.78
  -1 -17   3   59.38    2.45
  -1 -17   3   64.10    3.14
  -1 -17   2   37.09    2.57
  -1 -17   1    4.75    1.57
  -1 -17   0    2.54    1.50
  -1 -17   0    0.82    1.09
  -1 -17  -1   10.18    1.60
  -1 -17  -1   13.70    2.09
  -1 -17  -2   -0.20    1.31
  -1 -17  -2   -0.34    1.47
  -1 -17  -3   -0.45    1.34
  -1 -17  -3    1.26    1.57
  -1 -17  -4   -0.48    1.43
  -1 -17  -4   -0.76    1.56
  -1 -17  -5   -2.98    1.89
  -1 -17  -5   -2.15    1.84
  -1 -17  -6    4.97    2.05
  -1 -17  -6   -0.84    1.85
  -1 -17  -7   -4.32    2.13
  -1 -17  -7    1.66    1.91
  -1 -17  -8    5.51    2.18
  -1 -17  -8    7.50    2.43
  -1 -17  -9    8.74    2.38
  -1 -17 -10   -3.38    2.31
  -1 -18  27   13.86    8.89
  -1 -18  26   39.47   11.51
  -1 -18  25    7.31    1.95
  -1 -18  25   14.59   10.02
  -1 -18  24    0.63    8.93
  -1 -18  24   13.39    2.12
  -1 -18  23  195.76    6.29
  -1 -18  23  197.29   18.60
  -1 -18  22   23.82   11.33
  -1 -18  22    4.25    1.81
   1  18 -22   18.55   12.17
   1  18 -21  135.48   19.09
  -1 -18  21  136.71   15.74
  -1 -18  21  125.92    5.06
  -1 -18  20    6.88    1.81
   1  18 -20    9.10   11.74
   1  18 -19   68.38   14.66
  -1 -18  19   86.98    4.36
   1  18 -18   92.79   15.00
  -1 -18  18  105.84    4.80
  -1 -18  17  155.98    5.72
  -1 -18  16  114.26    4.97
  -1 -18  15   13.20    2.35
  -1 -18  14  323.79    8.05
  -1 -18  13    2.83    1.83
  -1 -18  12  340.41    8.28
  -1 -18  11    9.14    2.22
  -1 -18  11    6.74    2.12
   1  18 -10  160.35    7.74
  -1 -18  10  165.07    4.34
  -1 -18  10  170.42    5.95
  -1 -18   9  245.14    6.86
  -1 -18   9  224.22    4.96
  -1 -18   9  240.20    6.51
   1  18  -9  225.34    8.80
   1  18  -9  243.48    5.32
  -1 -18   8  284.31    7.34
   1  18  -8  295.36    5.70
  -1 -18   8  287.73    6.52
  -1 -18   8  290.24    5.85
  -1 -18   7  451.51    9.17
  -1 -18   7  443.73    7.35
  -1 -18   7  439.65    7.62
  -1 -18   6   51.50    2.68
  -1 -18   6   58.99    3.68
  -1 -18   6   60.39    3.13
  -1 -18   5   62.49    2.76
  -1 -18   5   65.06    3.75
  -1 -18   5   62.28    3.12
  -1 -18   4   12.05    1.49
  -1 -18   4   14.62    2.03
  -1 -18   3  227.29    5.80
  -1 -18   2   52.03    3.05
  -1 -18   1  178.08    5.48
  -1 -18   0   94.44    4.17
  -1 -18  -1   14.07    2.27
  -1 -18  -2   65.63    3.73
  -1 -18  -3   12.67    2.18
  -1 -18  -4   83.38    4.43
  -1 -18  -5    2.27    1.73
  -1 -18  -6   91.26    4.77
  -1 -18  -7    7.38    2.31
  -1 -18  -8   33.51    3.62
  -1 -18  -9   24.90    3.30
  -1 -19  26    3.43   10.14
  -1 -19  25   17.63   10.57
  -1 -19  25    4.15    1.69
  -1 -19  24    7.78    2.06
  -1 -19  24   -6.39    9.58
  -1 -19  23    0.74    9.72
  -1 -19  23    1.11    1.57
   1  19 -22    4.73   11.07
  -1 -19  22    0.67    1.53
  -1 -19  22    8.79    8.56
   1  19 -21    8.23   11.10
  -1 -19  21   12.95    9.21
  -1 -19  21    3.47    1.70
  -1 -19  20   13.51    2.20
   1  19 -20   25.26   12.39
  -1 -19  19    4.48    1.82
   1  19 -19   27.55   12.50
  -1 -19  18    0.41    1.66
  -1 -19  17    0.47    1.62
  -1 -19  16    0.69    1.59
  -1 -19  15    2.05    1.69
  -1 -19  14   25.05    2.85
  -1 -19  13    3.04    1.72
  -1 -19  12   24.47    2.80
  -1 -19  12   22.77    2.80
  -1 -19  11   43.12    3.44
  -1 -19  11   41.59    3.35
  -1 -19  11   37.51    2.25
   1  19 -11   36.52    4.58
   1  19 -10   34.89    4.29
   1  19 -10   35.87    2.28
  -1 -19  10   39.60    3.12
  -1 -19  10   39.99    3.00
  -1 -19  10   36.31    2.24
  -1 -19   9    9.30    1.73
   1  19  -9    4.54    1.40
   1  19  -9    4.57    2.75
  -1 -19   9    3.01    1.65
  -1 -19   9    4.05    1.23
  -1 -19   8   11.57    1.87
   1  19  -8   10.59    1.53
  -1 -19   8   10.23    1.45
  -1 -19   8   11.30    2.06
  -1 -19   7   10.52    1.58
  -1 -19   7   14.19    1.80
  -1 -19   7   14.71    2.32
  -1 -19   6    4.18    1.52
  -1 -19   6    5.16    1.78
  -1 -19   6    2.83    1.08
  -1 -19   5  190.15    5.32
  -1 -19   5  200.20    6.43
  -1 -19   4   22.31    2.16
  -1 -19   3    3.38    1.65
  -1 -19   2    5.55    1.68
  -1 -19   1    3.81    1.66
  -1 -19   0    3.04    1.66
  -1 -19  -1    2.64    1.53
  -1 -19  -2    2.25    1.78
  -1 -19  -3    6.85    2.06
  -1 -19  -4    4.59    2.08
  -1 -19  -5    6.66    2.20
  -1 -19  -6    3.84    2.13
  -1 -19  -7    2.50    1.95
  -1 -19  -8   -2.64    2.19
  -1 -20  26   15.15   11.37
  -1 -20  25   16.10    9.17
  -1 -20  24    3.01    1.73
  -1 -20  24   -2.40   10.66
   1  20 -23  126.93   21.06
  -1 -20  23  163.27   17.82
  -1 -20  23  144.75    5.76
   1  20 -22   21.56   12.85
  -1 -20  22   33.50    3.16
  -1 -20  22   38.75   11.78
  -1 -20  21  105.25    5.06
   1  20 -21  106.25   17.60
   1  20 -20   12.86   12.05
  -1 -20  20   12.13    2.32
   1  20 -19  117.11   17.23
  -1 -20  19  158.33    6.12
  -1 -20  18   19.15    2.61
  -1 -20  17  104.20    5.21
  -1 -20  16   99.62    4.99
  -1 -20  15   80.48    4.80
  -1 -20  14  404.76   10.67
  -1 -20  14  391.75    9.62
  -1 -20  13   21.05    2.82
  -1 -20  13   17.30    2.62
  -1 -20  12  141.12    4.08
  -1 -20  12  139.46    5.76
  -1 -20  12  147.96    6.03
   1  20 -11   26.59    2.33
   1  20 -11   28.48    4.46
  -1 -20  11   24.58    2.29
  -1 -20  11   30.58    3.41
  -1 -20  11   36.25    3.27
   1  20 -10  107.49    6.94
  -1 -20  10  109.09    3.92
  -1 -20  10  114.24    4.94
  -1 -20  10  110.26    5.10
   1  20 -10  118.52    3.95
  -1 -20   9  321.62    6.64
  -1 -20   9  322.87    8.49
  -1 -20   9  316.81    7.33
  -1 -20   8   48.87    2.97
  -1 -20   8   46.74    2.80
  -1 -20   8   42.61    3.56
  -1 -20   7  148.80    5.88
  -1 -20   7  139.42    4.58
  -1 -20   6  106.74    5.05
  -1 -20   6  105.32    4.15
  -1 -20   5  179.22    5.38
  -1 -20   5  197.76    6.70
  -1 -20   4   38.53    3.48
  -1 -20   4   32.98    2.88
  -1 -20   3  281.04    7.03
  -1 -20   2   61.39    3.55
  -1 -20   1  104.29    4.62
  -1 -20   0   47.72    3.43
  -1 -20  -1   98.47    4.71
  -1 -20  -2   64.92    4.06
  -1 -20  -3   18.74    2.70
  -1 -20  -4  101.46    5.24
  -1 -20  -5   15.55    2.66
  -1 -20  -6    5.32    2.12
  -1 -20  -7    8.70    2.59
  -1 -21  25   22.93   12.22
  -1 -21  24    1.94    8.71
   1  21 -23    1.57   12.55
  -1 -21  23    6.10    2.10
  -1 -21  23   -0.01    9.63
  -1 -21  22    3.47    8.69
  -1 -21  22    2.06    1.88
   1  21 -22    6.28   12.15
   1  21 -21   14.23   11.59
  -1 -21  21    5.74    2.16
   1  21 -20   26.76   12.99
  -1 -21  20   15.36    2.53
  -1 -21  19    5.38    1.97
  -1 -21  18   -0.53    1.76
  -1 -21  17    5.65    2.22
  -1 -21  16    4.89    1.96
  -1 -21  15   12.39    2.40
  -1 -21  15    6.29    2.48
  -1 -21  14    2.39    1.94
  -1 -21  14    0.15    1.78
  -1 -21  13    0.27    1.81
  -1 -21  13    4.09    1.99
  -1 -21  12    6.21    1.30
   1  21 -12    8.05    1.61
  -1 -21  12    3.21    1.69
  -1 -21  12    3.90    1.71
  -1 -21  11   16.76    2.57
   1  21 -11   20.75    3.92
  -1 -21  11   20.09    1.98
  -1 -21  11   24.01    2.68
   1  21 -11   14.79    1.72
  -1 -21  10   -2.30    1.87
   1  21 -10   -0.31    1.61
  -1 -21  10   -2.52    1.53
  -1 -21  10    1.67    1.20
   1  21  -9   55.53    2.89
  -1 -21   9   58.05    3.96
  -1 -21   9   54.81    2.96
  -1 -21   9   49.20    3.07
  -1 -21   8    4.88    1.51
  -1 -21   8    2.63    1.94
  -1 -21   7    7.64    2.06
  -1 -21   7    5.26    1.49
  -1 -21   6   14.58    2.58
  -1 -21   6   16.44    2.21
  -1 -21   5    4.17    1.99
  -1 -21   5    6.40    1.83
  -1 -21   4   19.17    2.74
  -1 -21   4   14.67    2.16
  -1 -21   3    4.90    1.83
  -1 -21   2    2.19    1.72
  -1 -21   1    4.90    1.83
  -1 -21   0   31.76    2.98
  -1 -21  -1    9.47    2.14
  -1 -21  -2    9.43    2.30
  -1 -21  -3    2.59    2.03
  -1 -21  -4    1.07    2.00
  -1 -21  -5    4.38    2.57
  -1 -22  24    1.52   10.52
   1  22 -24   12.41   13.53
   1  22 -23   50.73   15.78
  -1 -22  23   38.46    3.46
  -1 -22  23   36.81   11.58
   1  22 -22    5.38   10.23
  -1 -22  22   19.63   11.02
  -1 -22  22   19.67    2.75
  -1 -22  21   87.85    4.84
   1  22 -21   63.04   15.19
  -1 -22  20    3.93    2.11
   1  22 -20   -3.64   11.15
  -1 -22  19   86.85    4.97
  -1 -22  18   -0.44    1.86
  -1 -22  17  116.57    5.80
  -1 -22  16  125.46    6.67
  -1 -22  16  111.13    5.54
  -1 -22  15  103.12    5.87
  -1 -22  15   90.42    5.14
  -1 -22  14  116.82    5.78
  -1 -22  14  119.70    5.84
  -1 -22  13   67.56    4.55
  -1 -22  13   80.90    4.67
  -1 -22  12  129.98    6.06
  -1 -22  12  142.71    5.88
  -1 -22  11    2.38    1.95
  -1 -22  11    5.48    1.47
  -1 -22  11    6.83    1.93
   1  22 -11    7.67    3.63
   1  22 -10  164.49    8.95
  -1 -22  10  163.95    5.02
  -1 -22  10  165.06    6.59
  -1 -22  10  161.09    5.56
  -1 -22   9   15.80    2.64
  -1 -22   9   17.49    2.10
  -1 -22   8   85.99    4.94
  -1 -22   8   81.09    3.80
  -1 -22   7   62.41    4.40
  -1 -22   7   64.26    3.52
  -1 -22   6   95.31    5.24
  -1 -22   6   85.87    4.07
  -1 -22   5  111.61    5.62
  -1 -22   5  106.10    4.63
  -1 -22   4   19.87    3.07
  -1 -22   4   16.82    2.27
  -1 -22   3   68.39    3.95
  -1 -22   2    1.37    1.67
  -1 -22   1   73.48    4.28
  -1 -22   0   10.04    2.40
  -1 -22  -1   33.80    3.29
  -1 -22  -2   28.51    3.31
  -1 -22  -3    4.50    2.37
  -1 -22  -4   19.81    2.95
   1  23 -24    3.79   11.90
  -1 -23  24   20.36   11.42
   1  23 -23    1.34   12.06
  -1 -23  23    5.73    9.52
  -1 -23  22    7.20    2.25
  -1 -23  22   11.09   10.97
   1  23 -21    9.86   12.33
  -1 -23  21    2.06    1.88
  -1 -23  20   -1.55    1.95
   1  23 -20   11.52   11.12
  -1 -23  19   17.04    2.90
  -1 -23  18    2.45    2.53
  -1 -23  18    1.24    2.07
  -1 -23  17    8.64    2.82
  -1 -23  17    7.86    2.37
  -1 -23  16   17.94    2.89
  -1 -23  16   15.34    2.83
  -1 -23  15   11.61    2.50
  -1 -23  15    4.16    2.17
  -1 -23  14   28.18    3.38
  -1 -23  14   33.97    3.55
  -1 -23  13   21.88    2.81
  -1 -23  13   18.21    2.78
  -1 -23  12    5.96    2.27
  -1 -23  12   10.07    2.17
  -1 -23  11    4.34    2.14
   1  23 -11    2.82    3.41
  -1 -23  10   -0.29    1.29
   1  23 -10    0.65    3.05
  -1 -23  10    2.53    1.90
  -1 -23   9    9.50    2.68
  -1 -23   9    5.94    1.62
  -1 -23   8    2.18    2.18
  -1 -23   8    3.01    1.61
  -1 -23   7    3.46    2.00
  -1 -23   7    0.01    1.40
  -1 -23   6   -1.80    1.86
  -1 -23   6    2.71    2.00
  -1 -23   5    4.58    2.32
  -1 -23   5    5.64    1.98
  -1 -23   4    2.94    1.81
  -1 -23   4    1.51    2.07
  -1 -23   3    2.48    2.04
  -1 -23   3    4.19    1.99
  -1 -23   2   -0.55    1.70
  -1 -23   1    0.66    1.95
  -1 -23   0    5.42    2.26
  -1 -23  -1   17.22    2.83
  -1 -23  -2    4.53    2.28
  -1 -23  -3   10.50    2.54
  -1 -24  23   30.85   12.25
   1  24 -23   14.42   14.88
   1  24 -22   44.78   15.27
  -1 -24  22   41.83   13.42
  -1 -24  21   23.28    3.18
   1  24 -21    1.57   11.88
  -1 -24  20   17.36    3.87
  -1 -24  20   15.04    3.00
   1  24 -20   20.62   13.57
  -1 -24  19   87.84    6.36
  -1 -24  19   82.24    5.27
  -1 -24  18    4.02    2.24
  -1 -24  18    7.81    2.82
  -1 -24  17  155.98    6.88
  -1 -24  17  162.55    7.70
  -1 -24  16   26.73    3.43
  -1 -24  16   26.45    3.44
  -1 -24  15  132.49    6.41
  -1 -24  15  113.22    6.09
  -1 -24  14   37.07    3.66
  -1 -24  14   42.05    4.13
  -1 -24  13   43.99    3.69
  -1 -24  13   51.17    4.28
  -1 -24  12  198.97    7.95
   1  24 -11   18.63    4.70
  -1 -24  11   20.83    3.20
   1  24 -10  223.07   11.18
  -1 -24  10  232.15    8.38
  -1 -24   9   -0.27    2.17
  -1 -24   9    4.18    1.82
   1  24  -9    3.25    3.65
  -1 -24   8   76.60    5.13
  -1 -24   8   71.30    3.91
  -1 -24   7   14.65    2.31
  -1 -24   7   17.72    2.99
  -1 -24   6   62.73    3.82
  -1 -24   6   61.27    4.78
  -1 -24   5   70.14    5.08
  -1 -24   5   68.62    4.05
  -1 -24   4   20.06    3.33
  -1 -24   4   20.49    2.59
  -1 -24   3   19.65    3.32
  -1 -24   3   19.49    2.67
  -1 -24   2    1.40    2.36
  -1 -24   2   11.66    2.50
  -1 -24   1    1.57    1.84
  -1 -24   0   -2.97    2.34
  -1 -24  -1   37.27    3.77
   1  25 -22    7.54   13.67
  -1 -25  22   -5.29   11.03
  -1 -25  22    4.15    3.31
   1  25 -21    2.20   11.93
  -1 -25  21    6.33    3.33
   1  25 -20    8.89   11.98
  -1 -25  20    1.58    2.10
  -1 -25  20   -1.54    2.80
  -1 -25  19    0.89    2.21
  -1 -25  19    0.34    2.55
  -1 -25  18    0.88    2.15
  -1 -25  18    3.03    2.45
  -1 -25  17    1.91    2.23
  -1 -25  17    3.08    2.28
  -1 -25  16    3.54    2.36
  -1 -25  16    0.28    1.96
  -1 -25  15    4.43    2.49
  -1 -25  15    2.85    2.20
  -1 -25  14    9.50    2.81
  -1 -25  13    1.05    2.10
  -1 -25  12    2.30    2.23
   1  25 -11    4.57    4.05
  -1 -25  11    3.73    2.50
  -1 -25  10   19.19    3.24
   1  25 -10   12.78    4.44
  -1 -25   9    1.60    2.19
   1  25  -9    3.27    3.78
  -1 -25   8    8.30    2.63
  -1 -25   8    6.94    1.97
  -1 -25   7    0.52    1.54
  -1 -25   7   -2.41    2.32
  -1 -25   6    4.47    1.95
  -1 -25   6    4.25    2.65
  -1 -25   5    4.49    2.38
  -1 -25   5   10.18    2.25
  -1 -25   4    1.32    2.43
  -1 -25   4    1.49    1.77
  -1 -25   3    4.21    2.81
  -1 -25   3    3.98    2.04
  -1 -25   2    7.36    2.28
  -1 -25   2    8.39    3.03
  -1 -25   1   -0.48    2.36
  -1 -25   1    3.05    2.36
  -1 -25   0   -1.02    2.03
  -1 -26  22   71.25    6.76
   1  26 -21   31.57   16.07
  -1 -26  21   38.22    5.07
  -1 -26  20   36.62    4.55
  -1 -26  19   62.83    5.48
  -1 -26  19   56.09    4.76
  -1 -26  18    4.91    2.46
  -1 -26  18   -1.91    2.61
  -1 -26  17   82.29    5.65
  -1 -26  17   75.98    5.50
  -1 -26  16    8.12    2.91
  -1 -26  15   82.56    5.83
  -1 -26  14   19.07    3.56
  -1 -26  13   23.76    3.49
  -1 -26  12   27.87    3.70
  -1 -26  11    5.59    2.82
   1  26 -11    0.87    4.32
   1  26 -10   79.81    7.79
  -1 -26  10   79.96    5.42
   1  26  -9    2.95    3.88
  -1 -26   9    4.55    2.65
  -1 -26   8   95.65    6.30
  -1 -26   7    0.30    2.63
  -1 -26   7    0.77    1.71
  -1 -26   6   51.39    3.84
  -1 -26   6   52.21    4.81
  -1 -26   5   31.34    4.03
  -1 -26   5   33.67    3.26
  -1 -26   4   33.88    4.26
  -1 -26   4   30.71    3.44
  -1 -26   3   32.51    4.36
  -1 -26   3   34.41    3.61
  -1 -26   2    5.14    2.48
  -1 -27  21    2.87    2.99
  -1 -27  20    6.52    3.05
  -1 -27  19   13.52    3.44
  -1 -27  18   39.62    4.19
  -1 -27  17    2.00    2.62
  -1 -27  16   11.16    3.11
  -1 -27  15    1.09    2.56
  -1 -27  14   10.46    3.27
  -1 -27  13    0.79    2.28
  -1 -27  12   -0.90    2.48
  -1 -27  11   10.86    3.08
   1  27 -11   20.58    5.65
  -1 -27  10   -1.58    2.53
   1  27 -10   -0.61    4.26
  -1 -27   9    1.41    2.79
   1  27  -9    3.85    4.64
  -1 -27   8    2.55    2.61
   1  27  -8    1.62    4.48
  -1 -27   7    1.81    2.52
  -1 -27   6   -0.50    2.55
  -1 -27   5    3.43    2.21
  -1 -27   4   -0.35    2.19
  -1 -28  16    9.55    3.25
  -1 -28  15   33.88    4.39
  -1 -28  14    6.20    2.89
  -1 -28  13  112.73    6.84
  -1 -28  12    7.52    3.13
  -1 -28  11   54.74    5.39
   1  28 -11   42.67    7.28
  -1 -28  10   43.35    4.76
   1  28 -10   25.55    6.33
  -1 -28   9    4.25    2.79
   1  28  -9    5.07    4.66
   1  28  -8   53.61    7.84
  -1 -29  13   54.99    5.49
   2 -27   7    0.39    2.87
  -2  27  -7    2.39    5.13
  -2  27  -8   14.43    5.91
   2 -27   8   18.48    3.94
   2 -27   9   45.43    5.02
   2 -27  10    9.21    3.10
   2 -27  11   39.64    4.77
   2 -27  12    6.23    2.95
   2 -27  13   47.88    5.05
   2 -27  14    5.20    3.15
   2 -27  15   39.77    4.75
   2 -27  16   11.45    3.10
   2 -27  17   41.03    4.65
   2 -27  18   19.85    3.86
   2 -27  19  106.63    6.96
   2 -26   1    4.19    2.31
   2 -26   4   -1.01    2.35
   2 -26   5    2.92    2.79
  -2  26  -5   -4.13    5.35
   2 -26   6    8.39    3.05
  -2  26  -6    4.94    4.66
   2 -26   7   -3.87    2.74
  -2  26  -7   -0.10    4.14
   2 -26   8    2.80    2.46
  -2  26  -8    6.21    4.80
   2 -26   9    3.64    2.66
   2 -26  10    4.74    2.80
   2 -26  11   -0.17    2.32
   2 -26  12    4.48    2.84
   2 -26  13    0.44    2.61
   2 -26  14    1.91    2.41
   2 -26  15   20.06    3.55
   2 -26  16    2.69    2.63
   2 -26  17    8.39    2.97
   2 -26  18    8.52    3.07
   2 -26  19    3.21    2.59
   2 -26  20    3.24    2.59
   2 -26  21    1.90    2.47
   2 -25  -1   36.04    3.84
   2 -25   0    2.18    2.22
   2 -25   1   26.42    3.32
   2 -25   2   21.99    2.96
   2 -25   2   22.86    4.03
   2 -25   3   26.87    4.00
   2 -25   4   78.61    5.84
  -2  25  -5    4.61    4.58
   2 -25   5    3.76    2.63
   2 -25   6   84.07    5.83
  -2  25  -6   82.90    8.67
   2 -25   7    4.86    2.80
  -2  25  -7   -0.84    4.46
   2 -25   8   48.18    4.63
  -2  25  -8   43.15    6.57
   2 -25   9   19.12    3.42
   2 -25  10   77.80    5.62
   2 -25  11   79.20    5.70
   2 -25  12   96.51    6.06
   2 -25  13  111.75    6.72
   2 -25  14    6.36    2.82
   2 -25  15   71.98    5.47
   2 -25  16   25.05    3.64
   2 -25  17   68.35    5.32
   2 -25  18   20.11    3.34
   2 -25  19   97.95    6.10
   2 -25  20   82.00    5.61
   2 -25  21    1.03    2.30
   2 -25  22   42.65    4.35
   2 -25  23    0.45    2.11
   2 -24  -2   12.64    2.77
   2 -24  -1    8.26    2.89
   2 -24  -1   14.95    2.75
   2 -24   0   22.27    3.81
   2 -24   0   17.83    2.87
   2 -24   1    0.10    2.26
   2 -24   1    0.91    1.85
   2 -24   2    4.92    1.97
   2 -24   2    0.78    2.40
   2 -24   3   -2.29    1.84
   2 -24   3   -0.47    2.41
   2 -24   4    2.67    1.68
   2 -24   4    2.89    2.60
  -2  24  -5    4.93    4.32
   2 -24   5    6.30    2.86
  -2  24  -6   -2.59    4.18
   2 -24   6   -2.67    2.48
   2 -24   7   11.08    2.81
  -2  24  -7   14.11    4.82
   2 -24   8    8.36    2.77
  -2  24  -8    8.65    4.53
   2 -24   9    6.33    2.55
   2 -24  10   16.07    3.10
   2 -24  11   13.65    2.99
   2 -24  12   18.66    3.42
   2 -24  13   10.08    2.92
   2 -24  14    2.65    2.18
   2 -24  15    0.08    2.19
   2 -24  16   -0.26    2.17
   2 -24  17    1.32    2.18
   2 -24  18   21.13    3.26
   2 -24  19    3.04    2.29
   2 -24  20    1.29    2.17
   2 -24  21    0.59    2.25
   2 -24  22    5.69    2.42
   2 -24  23    2.13    2.21
   2 -24  24    8.26    2.77
   2 -23  -4    2.79    2.12
   2 -23  -3    4.90    2.25
   2 -23  -2    1.45    2.08
   2 -23  -1   25.98    3.17
   2 -23   0   12.74    2.57
   2 -23   0   15.27    2.98
   2 -23   1   67.99    4.25
   2 -23   1   67.94    5.10
   2 -23   2    8.88    2.81
   2 -23   2    9.03    2.10
   2 -23   3   88.40    5.70
   2 -23   3   78.28    4.25
   2 -23   4   41.52    4.14
   2 -23   4   39.74    3.14
   2 -23   5   26.77    3.31
   2 -23   5   18.93    2.33
   2 -23   6  194.62    7.97
  -2  23  -6  196.16   11.27
  -2  23  -7    0.79    3.67
   2 -23   7   -0.52    2.44
  -2  23  -8  182.05   10.66
   2 -23   8  181.45    7.62
   2 -23   9   20.05    3.15
   2 -23  10  107.13    6.04
   2 -23  11  118.58    6.31
   2 -23  12   65.89    5.00
   2 -23  13   79.36    5.43
   2 -23  14   11.99    2.74
   2 -23  15   85.60    5.43
   2 -23  16    0.83    1.99
   2 -23  17  169.80    7.51
   2 -23  18    6.76    2.53
   2 -23  19   94.91    5.86
   2 -23  20   45.49    4.31
   2 -23  21    3.37    2.41
   2 -23  22   48.96    4.26
   2 -23  23   -0.79    2.24
   2 -23  24  100.14    5.82
   2 -23  25   12.25    2.84
   2 -22  -5    2.75    2.35
   2 -22  -4    5.43    2.32
   2 -22  -3   19.84    3.06
   2 -22  -2   -1.66    1.93
   2 -22  -1    6.32    2.17
   2 -22   0    4.80    2.54
   2 -22   0    3.20    1.94
   2 -22   1    5.67    1.80
   2 -22   1    8.38    2.35
   2 -22   2    7.19    2.01
   2 -22   2    1.22    2.10
   2 -22   3    0.47    1.54
   2 -22   3   -2.65    2.21
   2 -22   4   12.48    2.67
   2 -22   4   13.32    2.00
   2 -22   5    4.44    2.41
   2 -22   5    5.84    1.62
  -2  22  -6    9.38    4.23
   2 -22   6    6.67    1.52
   2 -22   6   15.93    2.85
   2 -22   7   16.83    2.97
  -2  22  -7   20.27    4.57
   2 -22   8    8.12    2.54
  -2  22  -8    2.33    3.41
   2 -22   9    1.67    1.97
   2 -22  10    2.28    2.07
   2 -22  11    9.63    2.64
   2 -22  12   27.48    3.44
   2 -22  13    7.66    2.58
   2 -22  14    0.94    2.27
   2 -22  15    7.18    2.42
   2 -22  16    2.70    2.25
   2 -22  17   23.06    3.30
   2 -22  18    2.36    2.24
   2 -22  19    8.90    2.58
   2 -22  20    2.28    2.11
   2 -22  21    2.76    2.36
   2 -22  22   -3.84    2.18
   2 -22  23    2.22    1.98
   2 -22  24   -2.01    2.11
  -2  22 -24   31.98   14.34
   2 -22  25   -0.23    1.87
   2 -21  -6   73.08    4.95
   2 -21  -5   30.76    3.62
   2 -21  -4   11.84    2.66
   2 -21  -3    8.21    2.41
   2 -21  -2   43.37    3.61
   2 -21  -1  107.86    5.15
   2 -21   0    3.68    1.88
   2 -21   1  122.11    5.05
   2 -21   1  119.78    6.12
   2 -21   2    4.20    1.66
   2 -21   2    6.88    2.24
   2 -21   3   94.36    4.23
   2 -21   3  100.51    5.54
   2 -21   4   14.62    2.83
   2 -21   4   11.92    1.94
   2 -21   5   56.76    4.30
   2 -21   5   56.20    3.25
   2 -21   6  151.09    6.55
   2 -21   6  143.97    4.68
  -2  21  -6  152.23    9.40
   2 -21   7    0.34    1.15
  -2  21  -7   -0.95    3.11
   2 -21   7    2.85    2.17
  -2  21  -8  146.58    8.99
   2 -21   8  137.83    6.27
   2 -21   9   29.43    3.45
   2 -21  10  217.32    7.89
   2 -21  11   81.09    4.98
   2 -21  12   95.20    5.45
   2 -21  13   36.52    3.78
   2 -21  14    3.89    2.18
   2 -21  15  135.65    6.41
   2 -21  16   11.46    2.61
   2 -21  17  157.85    6.83
   2 -21  18   -0.36    2.05
   2 -21  19  236.79    8.26
   2 -21  20    9.38    2.58
   2 -21  21   20.10    2.86
   2 -21  22   52.39    4.11
  -2  21 -23    0.71   10.27
   2 -21  23    6.34    2.47
  -2  21 -24   51.13   16.24
   2 -21  24  105.10    5.50
   2 -21  25   22.93    2.99
   2 -21  26   30.71    3.52
   2 -20  -8    5.08    2.51
   2 -20  -7   -0.12    2.42
   2 -20  -6   -1.59    2.01
   2 -20  -5    0.06    1.94
   2 -20  -4   -0.85    1.88
   2 -20  -3    0.08    1.85
   2 -20  -2    3.22    1.94
   2 -20  -1    4.97    1.89
   2 -20   0   24.51    2.67
   2 -20   1    3.63    2.18
   2 -20   1    3.59    1.69
   2 -20   2    3.36    2.37
   2 -20   2    2.59    1.60
   2 -20   3   26.89    3.13
   2 -20   3   27.60    2.47
   2 -20   4   67.73    3.43
   2 -20   4   71.64    4.60
   2 -20   5    2.98    1.40
   2 -20   5    5.12    2.04
   2 -20   6    1.08    1.80
   2 -20   6   -0.12    1.17
  -2  20  -6   -1.22    3.11
  -2  20  -7    2.19    2.84
   2 -20   7   -1.07    1.10
   2 -20   7    1.14    1.97
  -2  20  -8   18.29    4.13
   2 -20   8   15.01    1.63
   2 -20   8   12.56    2.40
   2 -20   9    0.83    1.68
   2 -20  10    5.63    1.97
   2 -20  11    1.44    2.00
   2 -20  12    2.69    2.02
   2 -20  13    1.03    1.92
   2 -20  14    5.95    2.16
   2 -20  15    0.48    1.92
   2 -20  16    3.90    2.04
   2 -20  17    4.66    2.19
   2 -20  18   -0.51    1.86
   2 -20  19   -0.32    1.76
   2 -20  20    4.37    2.28
   2 -20  21   13.93    2.70
   2 -20  22    5.33    2.07
   2 -20  23    6.96    2.14
  -2  20 -23   13.43   10.79
  -2  20 -24   -2.34   11.00
   2 -20  24   11.65    2.53
   2 -20  25    1.67    2.01
  -2  20 -25   -0.83   11.56
   2 -20  26   -0.26    2.01
   2 -19 -10    7.94    2.64
   2 -19  -9    3.63    2.41
   2 -19  -9   -0.46    2.40
   2 -19  -8   46.50    4.13
   2 -19  -8   55.89    4.31
   2 -19  -7    5.24    2.24
   2 -19  -7    3.24    2.13
   2 -19  -6   26.78    3.26
   2 -19  -6   32.56    3.36
   2 -19  -5    0.26    1.87
   2 -19  -5    2.38    1.83
   2 -19  -4   79.97    4.61
   2 -19  -4   76.24    4.29
   2 -19  -3   32.11    3.07
   2 -19  -3   31.68    2.90
   2 -19  -2   18.58    2.29
   2 -19  -2   16.28    2.41
   2 -19  -1  117.66    4.54
   2 -19  -1  107.79    4.70
   2 -19   0   11.95    1.79
   2 -19   0   10.48    1.89
   2 -19   1   75.40    3.49
   2 -19   1   79.08    3.87
   2 -19   2    1.49    1.16
   2 -19   2   -0.98    1.82
   2 -19   2   -0.03    1.49
   2 -19   3  134.70    5.80
   2 -19   3  126.23    4.07
   2 -19   4   72.36    4.48
   2 -19   4   71.79    3.41
   2 -19   4   79.29    3.21
   2 -19   5  158.01    4.68
   2 -19   5  164.33    4.29
   2 -19   5  170.64    6.47
   2 -19   6  199.63    5.02
   2 -19   6  198.23    6.90
   2 -19   6  204.20    4.58
  -2  19  -6  191.68    9.56
   2 -19   7   89.57    4.84
  -2  19  -7   81.62    6.66
   2 -19   7   82.13    2.90
   2 -19   7   82.78    3.17
   2 -19   8   76.52    2.71
  -2  19  -8   74.96    6.29
   2 -19   8   70.34    2.78
   2 -19   8   66.30    4.13
   2 -19   9   31.19    3.25
   2 -19   9   30.32    1.82
   2 -19  10  367.25    9.45
   2 -19  11   -0.74    1.88
   2 -19  12  548.59   11.69
   2 -19  13  110.41    5.44
   2 -19  14   51.06    3.93
   2 -19  15  168.08    6.68
   2 -19  16    3.40    2.08
   2 -19  17  219.69    7.55
   2 -19  18    4.75    2.14
   2 -19  19  117.41    5.55
   2 -19  20    7.21    2.18
   2 -19  21   32.46    3.32
   2 -19  22   31.43    3.29
  -2  19 -23   18.82   10.18
   2 -19  23   25.37    3.05
   2 -19  24   66.13    4.48
  -2  19 -24   60.57   15.78
   2 -19  25   46.93    3.72
  -2  19 -25   47.30   16.21
   2 -19  26   39.40    3.52
   2 -18 -12    7.05    3.04
   2 -18 -11   12.97    3.08
   2 -18 -10    3.97    2.40
   2 -18 -10   -0.90    2.12
   2 -18  -9    9.80    2.74
   2 -18  -9    0.30    2.24
   2 -18  -8    2.99    2.08
   2 -18  -8   -1.62    2.09
   2 -18  -7    0.08    1.93
   2 -18  -7    2.76    2.02
   2 -18  -6   83.31    4.76
   2 -18  -6   79.64    4.67
   2 -18  -5    5.07    2.10
   2 -18  -5    6.07    1.91
   2 -18  -4    1.82    1.67
   2 -18  -4    0.96    1.59
   2 -18  -3    0.86    1.68
   2 -18  -3    2.45    1.56
   2 -18  -2    4.97    1.63
   2 -18  -2    4.27    1.71
   2 -18  -1    4.53    1.59
   2 -18  -1    7.26    1.83
   2 -18   0   13.79    1.91
   2 -18   0   11.29    1.96
   2 -18   1    9.83    1.61
   2 -18   1    9.73    1.76
   2 -18   2   62.16    2.97
   2 -18   2   60.55    3.92
   2 -18   2   59.28    3.13
   2 -18   3    7.14    1.36
   2 -18   3    7.38    1.99
   2 -18   3    7.87    1.58
   2 -18   4    2.63    1.79
   2 -18   4    2.85    1.10
   2 -18   4    3.59    1.36
   2 -18   5  155.54    5.96
   2 -18   5  158.17    4.43
   2 -18   5  148.23    3.90
   2 -18   6    1.41    1.77
   2 -18   6    0.11    0.90
   2 -18   6   -1.10    1.26
  -2  18  -6    1.42    3.08
   2 -18   6    0.53    1.03
   2 -18   7   30.99    1.82
   2 -18   7   28.05    2.87
  -2  18  -7   31.79    4.29
   2 -18   7   29.50    1.88
  -2  18  -8  154.16    8.41
   2 -18   8  151.57    3.65
   2 -18   8  142.39    5.61
   2 -18   8  149.71    3.78
   2 -18   9    4.91    1.02
   2 -18   9    3.55    0.92
   2 -18  10   57.51    3.90
   2 -18  11   12.54    2.13
   2 -18  12   18.59    2.78
   2 -18  13    1.65    1.99
   2 -18  14    1.28    1.71
   2 -18  15   23.18    2.76
   2 -18  16    3.85    1.94
   2 -18  17   24.22    2.79
   2 -18  18    2.10    1.91
   2 -18  19    2.47    1.59
   2 -18  20    7.60    2.13
   2 -18  21    7.84    2.20
   2 -18  22   26.12    3.03
  -2  18 -22   19.08    9.99
  -2  18 -23   20.65   11.15
   2 -18  23   24.36    2.83
  -2  18 -24   11.08   11.56
   2 -18  24    1.91    1.96
  -2  18 -25   13.57   11.23
   2 -18  25    9.96    2.26
   2 -18  26   31.43   12.24
   2 -18  26    0.03    1.73
   2 -18  27    2.51    1.82
   2 -17 -13    7.13    3.13
   2 -17 -12    4.72    2.72
   2 -17 -11   10.15    2.68
   2 -17 -11   19.52    3.40
   2 -17 -10   25.05    3.53
   2 -17 -10   27.42    3.42
   2 -17  -9   14.71    2.85
   2 -17  -9   11.41    2.82
   2 -17  -8   28.58    3.40
   2 -17  -8   25.12    3.20
   2 -17  -7    2.57    2.02
   2 -17  -7   -0.35    1.80
   2 -17  -6   29.46    2.89
   2 -17  -6   26.04    2.90
   2 -17  -5    4.97    1.88
   2 -17  -5    6.82    1.95
   2 -17  -4   77.39    4.09
   2 -17  -4   73.20    3.95
   2 -17  -3    9.69    2.06
   2 -17  -3    9.61    1.98
   2 -17  -2   17.58    2.23
   2 -17  -2   14.97    2.04
   2 -17  -1  197.78    5.52
   2 -17  -1  183.30    5.57
   2 -17   0   19.26    2.05
   2 -17   0   24.51    2.11
   2 -17   1  218.37    5.31
   2 -17   1  212.64    5.60
   2 -17   2   90.42    4.49
   2 -17   2   81.90    3.21
   2 -17   2   86.58    3.55
   2 -17   3  212.81    5.22
   2 -17   3  222.88    6.80
   2 -17   3  224.26    4.96
   2 -17   4   25.75    2.00
   2 -17   4   22.76    1.82
   2 -17   4   22.82    2.74
   2 -17   5  444.37    6.89
   2 -17   5  445.82    9.49
   2 -17   5  452.68    6.52
   2 -17   5  442.19    7.03
  -2  17  -6  261.10   10.23
   2 -17   6  243.28    7.07
   2 -17   6  246.73    4.73
   2 -17   6  252.54    5.02
   2 -17   7  242.85    4.58
   2 -17   7  219.29    6.77
  -2  17  -7  238.92    9.91
   2 -17   7  235.52    4.68
   2 -17   8  250.62    4.57
   2 -17   8  255.67    4.63
   2 -17   8  252.91    7.24
   2 -17   9  147.22    3.47
   2 -17   9  147.74    3.39
   2 -17  10  414.98    9.47
   2 -17  10    0.00    2.94
   2 -17  11   18.40    2.71
   2 -17  12  365.87    9.01
   2 -17  13   57.25    3.82
   2 -17  14  255.68    7.65
   2 -17  15   55.32    3.82
   2 -17  16  140.07    5.83
   2 -17  17  226.30    7.23
   2 -17  18    1.49    1.81
   2 -17  19  218.73    7.06
   2 -17  20    7.31    2.14
   2 -17  21   80.93    4.40
  -2  17 -22   48.23   13.35
   2 -17  22   94.34    4.76
   2 -17  23   26.65    2.94
  -2  17 -23   20.90   12.77
  -2  17 -24   75.36   15.26
   2 -17  24   38.67    3.23
   2 -17  25   34.56    3.25
   2 -17  26   45.97    3.44
   2 -17  26   30.87   11.24
   2 -17  27    3.44    1.71
   2 -17  27    5.16    9.56
   2 -16 -13    4.59    2.73
   2 -16 -12   -1.36    2.40
   2 -16 -12    2.59    2.19
   2 -16 -11   25.87    3.65
   2 -16 -11   22.40    3.30
   2 -16 -10    3.51    2.33
   2 -16 -10   -1.11    1.99
   2 -16  -9    1.76    2.30
   2 -16  -9    0.59    2.04
   2 -16  -8   16.84    2.61
   2 -16  -8   21.62    2.92
   2 -16  -8   13.80    3.78
   2 -16  -7    2.29    1.84
   2 -16  -7    0.33    1.77
   2 -16  -7    4.07    2.86
   2 -16  -6   15.86    2.39
   2 -16  -6   12.52    3.03
   2 -16  -6   13.25    2.25
   2 -16  -5    3.70    1.62
   2 -16  -5    5.87    2.76
   2 -16  -5    5.30    1.79
   2 -16  -4   44.50    4.17
   2 -16  -4   44.68    3.16
   2 -16  -4   46.58    3.19
   2 -16  -3   42.36    3.94
   2 -16  -3   43.90    2.99
   2 -16  -3   38.33    2.87
   2 -16  -2   43.14    2.81
   2 -16  -2   31.73    2.63
   2 -16  -1   25.28    2.14
   2 -16  -1   24.56    2.23
   2 -16   0    1.18    1.13
   2 -16   0   -0.78    1.27
   2 -16   1   75.35    3.13
   2 -16   1   73.06    3.29
   2 -16   2   -1.27    1.04
   2 -16   2   -0.19    1.21
   2 -16   2    2.23    1.48
   2 -16   3   75.12    2.88
   2 -16   3   75.79    3.99
   2 -16   3   70.00    2.98
   2 -16   4   75.76    3.93
   2 -16   4   75.78    2.80
   2 -16   4   71.94    2.88
   2 -16   4   73.26    2.68
   2 -16   5    4.27    1.73
   2 -16   5    2.79    0.94
   2 -16   5    3.46    1.11
   2 -16   6   11.30    1.24
   2 -16   6   11.64    1.97
  -2  16  -6   12.67    3.25
   2 -16   6    9.20    1.25
  -2  16  -7    3.61    2.78
   2 -16   7    3.37    0.93
   2 -16   7    3.04    1.61
  -2  16  -7    3.35    0.92
   2 -16   7    1.22    0.77
   2 -16   8    0.67    0.72
   2 -16   8   -0.57    1.44
   2 -16   8    0.69    0.76
   2 -16   9   24.49    1.57
   2 -16   9   29.09    1.53
   2 -16  10   57.95    3.77
   2 -16  10   61.26    1.98
   2 -16  11    1.66    1.55
   2 -16  12   67.48    3.93
   2 -16  13    0.93    1.71
   2 -16  14    1.99    1.70
   2 -16  15   45.59    3.47
   2 -16  16    6.91    1.91
   2 -16  17   53.00    3.66
   2 -16  18   22.87    2.64
   2 -16  19    2.31    1.81
   2 -16  20    3.77    1.75
   2 -16  21   24.96    2.78
  -2  16 -21   14.11    9.37
   2 -16  22    6.35    2.00
  -2  16 -22    1.37    9.22
  -2  16 -23   -6.37   10.16
   2 -16  23    2.02    1.49
  -2  16 -24   33.97   14.30
   2 -16  24    2.26    1.64
   2 -16  25   -1.33    8.49
   2 -16  25   -0.62    1.55
   2 -16  26   -1.11    1.69
   2 -16  26   -1.75    8.83
   2 -16  27    2.07    1.61
   2 -16  27    0.58    9.58
   2 -15 -14    0.66    2.57
   2 -15 -14    1.57    4.64
   2 -15 -13    6.74    2.77
   2 -15 -13    3.26    2.19
   2 -15 -13    0.98    4.17
   2 -15 -12   -0.83    4.10
   2 -15 -12    3.52    2.55
   2 -15 -12    0.17    2.28
   2 -15 -11   31.21    5.57
   2 -15 -11   20.78    3.23
   2 -15 -11   24.46    3.00
   2 -15 -10   20.52    2.94
   2 -15 -10   20.77    3.07
   2 -15 -10   19.23    4.81
   2 -15  -9   43.74    3.63
   2 -15  -9   40.16    5.44
   2 -15  -9   44.38    3.93
   2 -15  -8   16.27    2.53
   2 -15  -8   14.84    2.46
   2 -15  -8   17.60    3.85
   2 -15  -7   12.32    3.25
   2 -15  -7    7.11    1.99
   2 -15  -7    7.02    1.97
   2 -15  -6  187.56    6.15
   2 -15  -6  193.72    6.44
   2 -15  -6  182.57    8.34
   2 -15  -5   12.18    2.11
   2 -15  -5   13.12    3.16
   2 -15  -5   13.69    2.20
   2 -15  -4  418.34    8.42
   2 -15  -4  417.16   10.92
   2 -15  -3   69.91    3.50
   2 -15  -3   60.84    4.34
   2 -15  -3   65.02    3.43
   2 -15  -2   81.11    4.58
   2 -15  -2   72.48    3.51
   2 -15  -2   76.10    3.47
   2 -15  -1  121.58    5.01
   2 -15  -1  113.43    4.14
   2 -15  -1  110.66    3.99
   2 -15   0  173.78    4.66
   2 -15   0  170.00    4.75
   2 -15   0  162.48    5.43
   2 -15   1  253.11    5.61
   2 -15   1  266.55    5.85
   2 -15   1  267.16    5.41
   2 -15   2   30.89    2.20
   2 -15   2   22.16    1.19
   2 -15   2   25.66    1.87
   2 -15   2   27.29    2.09
   2 -15   3  498.19    5.97
   2 -15   3  529.29    7.04
   2 -15   3  537.01    9.51
   2 -15   3  491.53    7.14
   2 -15   3  522.61    6.19
   2 -15   4    2.50    1.07
   2 -15   4    0.71    1.10
   2 -15   4    2.55    1.71
   2 -15   5  346.63    7.83
   2 -15   5  359.96    5.47
   2 -15   6   51.56    2.15
  -2  15  -6   49.76    4.63
  -2  15  -6   53.40    1.74
   2 -15   6   54.69    3.30
   2 -15   6   53.58    2.13
  -2  15  -7   33.09    4.11
   2 -15   7   35.92    1.78
   2 -15   7   34.34    2.75
   2 -15   7   37.47    1.79
   2 -15   8  223.63    4.06
   2 -15   8  221.08    3.77
   2 -15   9  345.50    8.08
   2 -15   9  370.96    4.59
  -2  15 -10  736.42    5.66
   2 -15  10  742.41    6.07
   2 -15  11   19.88    2.37
   2 -15  11   21.54    1.09
   2 -15  12  307.59    7.86
   2 -15  13  164.08    5.84
   2 -15  14  343.76    8.36
   2 -15  15   16.14    2.46
   2 -15  16  300.82    7.86
   2 -15  17  241.62    6.94
   2 -15  18   52.04    3.55
   2 -15  19  218.83    6.78
   2 -15  20   44.78    3.29
   2 -15  21  156.43    5.80
  -2  15 -21  128.76   17.53
  -2  15 -22   25.90   11.32
   2 -15  22   12.42    2.21
  -2  15 -23   54.21   14.01
   2 -15  23   76.64    4.09
   2 -15  24   12.45    2.15
   2 -15  25   27.83   10.45
   2 -15  25   35.93    2.94
   2 -15  26   49.32    3.40
   2 -15  26   49.34   12.02
   2 -15  27    9.44    9.72
   2 -15  27    2.93    1.82
   2 -15  28   24.11    9.83
   2 -14 -16   -2.19    5.07
   2 -14 -15   11.84    3.40
   2 -14 -15   12.00    5.17
   2 -14 -14    4.64    2.78
   2 -14 -14    4.60    4.57
   2 -14 -14    3.30    2.46
   2 -14 -13    6.04    2.57
   2 -14 -13    4.32    2.30
   2 -14 -13    5.01    4.43
   2 -14 -12    5.76    4.04
   2 -14 -12    6.88    2.80
   2 -14 -12    6.85    2.40
   2 -14 -11   24.95    5.09
   2 -14 -11   35.37    3.86
   2 -14 -11   32.86    3.36
   2 -14 -10    0.08    1.81
   2 -14 -10   -0.11    2.13
   2 -14  -9   10.27    3.79
   2 -14  -9    7.29    2.03
   2 -14  -9    6.41    2.24
   2 -14  -8    1.58    3.19
   2 -14  -8    0.49    1.78
   2 -14  -8    0.96    1.76
   2 -14  -7   22.91    3.99
   2 -14  -7   17.38    2.45
   2 -14  -7   11.11    2.18
   2 -14  -6   71.00    5.47
   2 -14  -6   72.86    4.00
   2 -14  -6   60.85    3.57
   2 -14  -5   -0.06    1.57
   2 -14  -5   -0.47    2.23
   2 -14  -5   -0.10    1.46
   2 -14  -4  145.54    6.46
   2 -14  -4  154.22    5.13
   2 -14  -4  149.80    5.05
   2 -14  -3    4.54    1.44
   2 -14  -3    4.56    1.50
   2 -14  -3    4.53    2.02
   2 -14  -2   74.46    3.34
   2 -14  -2   70.81    3.32
   2 -14  -2   74.04    4.27
   2 -14  -1    0.89    1.01
   2 -14  -1    0.46    1.18
   2 -14  -1   -0.11    1.62
   2 -14   0   59.55    2.81
   2 -14   0   66.53    3.45
   2 -14   0   60.76    2.74
   2 -14   1  303.20    5.83
   2 -14   1  309.51    6.13
   2 -14   1  316.43    5.68
   2 -14   2   -0.30    1.02
   2 -14   2    2.28    1.01
   2 -14   2    1.05    0.59
   2 -14   2    2.29    0.97
   2 -14   3  180.86    5.42
   2 -14   3  170.03    3.44
   2 -14   3  181.68    4.02
   2 -14   3  187.36    4.22
   2 -14   3  179.13    3.81
   2 -14   4    0.78    0.87
   2 -14   4    0.00    0.47
   2 -14   4   -0.50    1.39
   2 -14   4   -0.29    0.82
   2 -14   5   50.58    2.10
   2 -14   5   51.78    3.18
   2 -14   5   53.37    2.15
  -2  14  -5   58.59    4.70
   2 -14   6   99.40    4.20
   2 -14   6  107.30    2.89
   2 -14   6  104.16    2.76
   2 -14   7    6.12    0.90
   2 -14   7    6.25    1.68
   2 -14   7    5.61    0.82
   2 -14   8   49.89    1.92
   2 -14   8   53.12    1.80
   2 -14   9    0.25    1.42
  -2  14  -9    1.04    0.52
   2 -14   9    0.65    0.29
   2 -14   9    0.60    0.60
   2 -14  10   28.43    1.08
   2 -14  10   31.56    2.90
   2 -14  10   32.07    1.28
   2 -14  11   18.76    2.36
   2 -14  11   19.90    1.07
   2 -14  11   19.22    0.92
   2 -14  12   94.56    2.39
   2 -14  12   89.92    4.27
   2 -14  13    3.13    0.83
   2 -14  13    4.45    1.81
   2 -14  14  159.70    3.55
   2 -14  14  136.14    5.25
   2 -14  15    4.64    1.04
   2 -14  15    3.59    1.80
   2 -14  16   17.53    2.30
   2 -14  16   17.72    1.63
   2 -14  17   11.38    1.59
   2 -14  17   21.33    2.45
   2 -14  18   14.85    1.80
   2 -14  18   19.77    2.40
   2 -14  19    1.92    1.32
   2 -14  19    3.31    1.69
   2 -14  20   58.03    3.58
   2 -14  20   69.15    3.31
   2 -14  21   17.61    2.32
   2 -14  21   13.07    1.93
  -2  14 -21    9.05    9.55
   2 -14  22   17.18    2.35
   2 -14  22   17.85    2.26
   2 -14  23    3.40    1.64
   2 -14  24    2.47    1.58
   2 -14  24    2.36    7.90
   2 -14  25    1.96    9.23
   2 -14  25   28.67    2.70
   2 -14  26    8.58    8.97
   2 -14  26    9.45    1.97
   2 -14  27    6.90    1.81
   2 -14  27    7.30    8.75
   2 -14  28    5.44    9.22
   2 -13 -16    1.69    2.82
   2 -13 -16    3.36    4.67
   2 -13 -15   12.92    5.48
   2 -13 -15   15.04    3.57
   2 -13 -14   -2.05    2.77
   2 -13 -14    0.20    2.06
   2 -13 -13   -3.81    2.62
   2 -13 -13    4.49    4.44
   2 -13 -13    1.96    2.26
   2 -13 -12    5.07    2.09
   2 -13 -12    9.06    4.10
   2 -13 -12    3.62    2.26
   2 -13 -11  127.86    6.17
   2 -13 -11  124.76    8.87
   2 -13 -11  119.97    5.49
   2 -13 -10    3.34    1.97
   2 -13 -10    5.92    3.44
   2 -13 -10    3.06    2.29
   2 -13  -9   57.19    5.79
   2 -13  -9   66.61    4.45
   2 -13  -9   66.13    3.99
   2 -13  -8   20.78    2.56
   2 -13  -8   18.78    3.84
   2 -13  -8   15.33    2.51
   2 -13  -7    4.73    3.29
   2 -13  -7    3.61    1.81
   2 -13  -7   -0.32    1.61
   2 -13  -6  253.37    6.93
   2 -13  -6  248.55    9.50
   2 -13  -6  263.47    6.67
   2 -13  -5   24.80    2.41
   2 -13  -5   28.57    3.68
   2 -13  -5   24.73    2.39
   2 -13  -4  282.42    8.73
   2 -13  -4  301.82    6.68
   2 -13  -3    5.16    1.29
   2 -13  -3    4.85    2.03
   2 -13  -3    0.71    1.37
   2 -13  -2  366.31    6.83
   2 -13  -2  365.51    6.84
   2 -13  -2  376.81    8.77
   2 -13  -1  110.95    3.65
   2 -13  -1  115.27    4.72
   2 -13  -1  114.14    3.79
   2 -13   0  201.19    5.50
   2 -13   0  190.90    4.60
   2 -13   1  384.86    6.03
   2 -13   1  385.56    6.66
   2 -13   1  376.00    6.19
   2 -13   2   54.71    1.91
   2 -13   2   53.51    2.32
   2 -13   2   57.23    2.41
   2 -13   2   51.24    2.33
   2 -13   3  609.98    6.23
   2 -13   3  620.12    9.43
   2 -13   3  625.96    7.11
   2 -13   3  618.66    7.17
   2 -13   4   89.59    2.12
   2 -13   4   99.57    2.85
   2 -13   4   95.33    2.80
   2 -13   4   90.49    3.76
   2 -13   5  413.78    5.41
  -2  13  -5  392.78   10.64
   2 -13   5  411.41    7.83
   2 -13   5  392.02    3.11
   2 -13   5  399.05    5.19
   2 -13   6   16.95    1.24
  -2  13  -6   18.29    2.94
   2 -13   6   12.84    0.52
   2 -13   6   13.57    1.86
   2 -13   6   16.63    1.17
   2 -13   6   12.25    0.62
   2 -13   7  477.03    3.28
   2 -13   7  499.79    8.83
   2 -13   7  500.43    5.76
   2 -13   7  497.29    5.18
   2 -13   8  491.26    3.81
   2 -13   8  512.60    5.81
   2 -13   8  493.85    8.86
   2 -13   8  510.48    4.85
   2 -13   9  456.93    4.24
   2 -13   9  446.39    4.07
   2 -13  10  392.00    8.17
   2 -13  10  400.59    3.65
   2 -13  11   29.12    2.65
   2 -13  11   30.70    1.49
   2 -13  11   26.66    0.88
   2 -13  12  529.73    9.60
   2 -13  12  563.94    6.19
   2 -13  13    2.50    0.90
   2 -13  13    2.47    1.56
   2 -13  14  584.81   10.18
   2 -13  14  635.48    7.46
   2 -13  15   75.14    2.81
   2 -13  15   79.34    3.93
   2 -13  16   28.67    2.59
   2 -13  16   32.25    2.06
   2 -13  17  132.34    4.95
   2 -13  17  142.13    4.17
   2 -13  18   14.10    2.14
   2 -13  18   11.43    1.65
   2 -13  19  151.67    4.91
   2 -13  19  157.33    5.37
  -2  13 -20   52.93   12.16
   2 -13  20   45.32    3.09
   2 -13  20   41.61    2.88
   2 -13  21  108.72    4.54
   2 -13  21  114.05    4.46
  -2  13 -21   96.80   14.27
  -2  13 -22    5.32    9.20
   2 -13  22    4.64    1.62
   2 -13  22    6.78    1.67
   2 -13  23   33.82    9.80
   2 -13  23   41.08    3.05
   2 -13  23   34.15    2.85
   2 -13  24   30.56    2.86
   2 -13  24   26.93    2.61
   2 -13  24   25.63   10.05
   2 -13  25   18.47    2.80
   2 -13  25   40.11   11.31
   2 -13  25   34.61    2.83
   2 -13  26   49.06    3.30
   2 -13  26   33.34   10.34
   2 -13  27   40.44    3.16
   2 -13  27   39.77   10.33
   2 -13  28   37.02   10.59
   2 -12 -17    9.63    3.51
   2 -12 -17   19.16    6.27
   2 -12 -16   40.92    4.75
   2 -12 -16   26.34    6.27
   2 -12 -15    2.16    4.72
   2 -12 -15    8.58    3.01
   2 -12 -14   -1.09    2.03
   2 -12 -14    2.67    2.68
   2 -12 -13    9.97    3.04
   2 -12 -13   14.80    4.94
   2 -12 -13   10.16    2.57
   2 -12 -12    2.68    1.86
   2 -12 -12    6.84    2.56
   2 -12 -12    7.29    3.86
   2 -12 -11   39.43    3.85
   2 -12 -11   34.89    3.20
   2 -12 -11   36.58    5.35
   2 -12 -10    4.30    2.24
   2 -12 -10    3.79    1.81
   2 -12 -10    2.43    3.25
   2 -12  -9   18.77    3.99
   2 -12  -9   17.98    2.65
   2 -12  -9   15.53    2.28
   2 -12  -8   21.27    2.67
   2 -12  -8   13.36    3.43
   2 -12  -8   15.92    2.33
   2 -12  -7   39.68    3.18
   2 -12  -7   38.11    2.89
   2 -12  -6   20.44    2.33
   2 -12  -6   21.50    3.41
   2 -12  -6   18.16    2.15
   2 -12  -5    2.01    1.49
   2 -12  -5    1.00    1.27
   2 -12  -5    0.07    2.16
   2 -12  -4    7.41    1.64
   2 -12  -4   12.35    2.77
   2 -12  -4    7.99    1.56
   2 -12  -3   27.91    2.18
   2 -12  -3   26.97    2.14
   2 -12  -3   28.70    2.98
   2 -12  -2  246.00    5.44
   2 -12  -2  260.32    7.11
   2 -12  -2  261.96    5.54
   2 -12  -1   57.84    3.32
   2 -12  -1   54.35    2.57
   2 -12  -1   47.82    2.41
   2 -12   0   70.42    2.72
   2 -12   0   73.06    3.27
   2 -12   0   59.36    1.15
   2 -12   0   70.90    2.78
   2 -12   0   53.56    3.18
   2 -12   1   27.21    1.78
   2 -12   1   27.54    1.94
   2 -12   1   25.98    1.07
   2 -12   1   29.39    1.76
   2 -12   2   41.86    2.00
   2 -12   2   43.06    2.00
   2 -12   2   43.71    1.99
   2 -12   3  297.93    4.77
   2 -12   3  303.69    4.24
   2 -12   3  289.51    6.19
   2 -12   3  293.62    4.69
   2 -12   4    1.03    0.53
   2 -12   4    2.18    0.72
   2 -12   4    1.37    0.39
   2 -12   4    2.57    1.23
   2 -12   4    0.79    0.74
   2 -12   5  484.04    5.31
   2 -12   5  442.52    3.95
   2 -12   5  481.32    5.66
  -2  12  -5  499.65   11.56
   2 -12   5  451.30    7.89
  -2  12  -6   25.74    1.27
   2 -12   6   25.01    2.22
   2 -12   6   24.98    0.97
  -2  12  -6   22.62    3.13
   2 -12   6   26.77    1.31
   2 -12   6   24.42    1.37
   2 -12   7    4.52    1.64
   2 -12   7    2.96    0.84
   2 -12   7    1.49    0.42
  -2  12  -7    0.51    0.60
   2 -12   7    3.49    0.71
  -2  12  -8  183.84    2.48
  -2  12  -8  174.66    3.16
   2 -12   8  184.91    2.64
   2 -12   8  182.45    2.63
   2 -12   9    3.23    1.37
   2 -12   9    2.48    0.62
   2 -12   9    3.10    0.52
   2 -12  10  110.33    4.30
   2 -12  10  117.42    2.58
   2 -12  10  113.90    1.65
   2 -12  11   96.08    1.30
   2 -12  11   98.19    4.19
   2 -12  12   15.01    2.03
   2 -12  12   20.68    1.42
   2 -12  13    0.09    0.84
   2 -12  13   -2.03    1.38
   2 -12  14    7.72    1.64
   2 -12  14    8.18    1.25
   2 -12  15    3.52    1.07
   2 -12  15    1.22    1.35
   2 -12  16   31.12    2.64
   2 -12  16   30.86    2.09
   2 -12  17    7.28    1.49
   2 -12  17    6.39    1.58
   2 -12  18   23.77    2.12
   2 -12  18   25.22    2.47
   2 -12  19   52.32    3.08
   2 -12  19   56.42    3.40
   2 -12  20    9.80    1.87
  -2  12 -20    7.42    7.63
   2 -12  20   12.25    1.88
   2 -12  21    5.54    1.68
   2 -12  21    4.78    1.59
  -2  12 -21   10.86    8.91
   2 -12  22    3.28    1.64
   2 -12  22    1.30    1.48
   2 -12  23    0.75    1.37
   2 -12  23   -2.83    7.53
   2 -12  23    0.07    1.49
   2 -12  24    9.12    1.93
   2 -12  24    3.67    1.79
   2 -12  24    2.05    7.78
   2 -12  25   28.89    2.63
   2 -12  25   19.07    2.65
   2 -12  25   19.14    8.94
   2 -12  26   -0.55    1.68
   2 -12  26    0.74    1.48
   2 -12  27    2.51    1.63
   2 -12  27    4.98    2.08
   2 -12  28    1.28    1.98
   2 -11 -18   28.91    6.84
   2 -11 -17   29.03    6.65
   2 -11 -17   42.30    4.97
   2 -11 -16   34.66    6.75
   2 -11 -16   30.47    4.31
   2 -11 -15   23.96    5.80
   2 -11 -15   19.50    3.53
   2 -11 -14   -3.33    4.27
   2 -11 -14    1.94    2.54
   2 -11 -14    2.13    1.95
   2 -11 -13    4.26    2.19
   2 -11 -13    1.99    4.07
   2 -11 -13    5.63    2.61
   2 -11 -12   -1.16    2.10
   2 -11 -12   -0.83    3.64
   2 -11 -12    0.10    1.75
   2 -11 -11  166.06    6.94
   2 -11 -11  153.36    9.35
   2 -11 -11  155.10    5.77
   2 -11 -10    3.75    1.81
   2 -11 -10    2.15    3.24
   2 -11 -10    2.47    1.91
   2 -11  -9   37.07    4.89
   2 -11  -9   42.25    3.50
   2 -11  -9   40.50    3.01
   2 -11  -8   -3.56    2.86
   2 -11  -8    0.06    1.54
   2 -11  -8    0.09    1.61
   2 -11  -7   13.07    3.31
   2 -11  -7   12.89    1.89
   2 -11  -7   12.69    2.10
   2 -11  -6   40.75    4.28
   2 -11  -6   42.95    2.77
   2 -11  -6   41.41    2.98
   2 -11  -5  138.79    4.74
   2 -11  -5  139.13    6.55
   2 -11  -5  131.36    4.34
   2 -11  -4  356.09    6.71
   2 -11  -4  366.15    7.10
   2 -11  -4  361.55    9.62
   2 -11  -3   44.62    2.47
   2 -11  -3   43.57    3.48
   2 -11  -3   45.31    2.54
   2 -11  -2  295.57    5.72
   2 -11  -2  286.10    7.17
   2 -11  -2  293.84    5.64
   2 -11  -1   10.91    1.86
   2 -11  -1    8.65    2.02
   2 -11   0  322.64    5.36
   2 -11   0  257.68    6.35
   2 -11   0  322.14    5.40
   2 -11   0  281.96    2.48
   2 -11   0  330.03    6.45
   2 -11   1  557.75    6.75
   2 -11   1  556.25    6.69
   2 -11   1  549.36    4.86
   2 -11   1  544.49    7.30
   2 -11   2  392.33    5.50
   2 -11   2  383.25    5.35
   2 -11   2  388.13    6.92
   2 -11   2  385.05    5.36
   2 -11   3  981.06    5.73
   2 -11   3  997.93   10.93
   2 -11   3 1001.43    7.36
   2 -11   3  997.34    8.28
  -2  11  -4   77.10    2.49
   2 -11   4   79.07    1.89
  -2  11  -4   89.72    4.97
   2 -11   4   82.08    2.37
   2 -11   4   77.27    2.15
   2 -11   4   80.34    3.34
  -2  11  -4   94.30    1.84
   2 -11   5  843.58   10.36
   2 -11   5  839.47    5.62
  -2  11  -5  848.78   14.47
   2 -11   5  871.41    6.54
   2 -11   5  883.79    7.43
  -2  11  -5  821.12    6.87
   2 -11   6   22.11    0.98
   2 -11   6   24.47    1.34
  -2  11  -6   18.85    1.15
   2 -11   6   23.50    2.06
   2 -11   6   22.27    1.11
  -2  11  -7  815.92    6.59
   2 -11   7  810.17   10.48
  -2  11  -7  850.74    4.78
   2 -11   7  856.45    5.74
   2 -11   7  813.75    6.94
   2 -11   7  851.06    5.47
   2 -11   8   31.84    1.03
   2 -11   8   31.07    2.47
   2 -11   8   31.74    1.29
   2 -11   9  426.58    3.05
   2 -11   9  437.20    4.83
   2 -11  10  248.49    3.94
   2 -11  10  240.63    6.02
   2 -11  11  317.22    4.80
   2 -11  11  298.26    6.80
   2 -11  12  629.63    9.81
   2 -11  12  649.23    7.28
   2 -11  13  130.01    3.55
   2 -11  13  122.40    4.50
   2 -11  14  208.84    5.72
   2 -11  14  207.72    4.74
   2 -11  15   -0.56    1.32
   2 -11  15    0.10    0.97
   2 -11  16  171.81    4.63
   2 -11  16  173.84    5.32
   2 -11  17  160.12    4.65
   2 -11  17  159.62    5.13
   2 -11  18   22.66    2.42
  -2  11 -18   21.33    8.10
   2 -11  18   27.17    2.30
   2 -11  19  162.54    5.23
   2 -11  19  174.47    5.27
  -2  11 -19  171.40   16.98
   2 -11  20    4.07    1.47
  -2  11 -20   12.86    8.97
   2 -11  20    5.69    1.69
   2 -11  21   57.96    3.28
   2 -11  21   57.52    3.63
   2 -11  22    3.67    1.75
   2 -11  22    2.32    1.46
   2 -11  23    1.63    7.36
   2 -11  23    3.79    1.46
   2 -11  23    2.96    1.78
   2 -11  24    9.38    1.86
   2 -11  24   10.61    2.29
   2 -11  25   62.90    3.59
   2 -11  25   60.10    3.98
   2 -11  26    9.12    1.86
   2 -11  26    4.76    7.28
   2 -11  26    8.19    2.22
   2 -11  27   43.56    3.72
   2 -11  27   47.77    3.37
   2 -11  28    0.60    1.86
   2 -10 -18    6.61    2.95
   2 -10 -18    0.01    5.20
   2 -10 -17    9.33    5.20
   2 -10 -17    3.12    2.86
   2 -10 -16   11.36    3.42
   2 -10 -16    3.29    4.95
   2 -10 -15    1.16    4.41
   2 -10 -15    7.62    2.95
   2 -10 -14    2.37    1.89
   2 -10 -14    3.02    2.37
   2 -10 -14    2.18    3.90
   2 -10 -13    3.47    2.53
   2 -10 -13    7.69    2.26
   2 -10 -12   -1.68    3.37
   2 -10 -12   -0.07    2.21
   2 -10 -12   -1.16    1.79
   2 -10 -11   10.12    2.08
   2 -10 -11   10.74    2.64
   2 -10 -11   10.62    3.89
   2 -10 -10    5.13    2.12
   2 -10 -10    4.08    1.65
   2 -10 -10    2.03    3.24
   2 -10  -9    2.11    1.84
   2 -10  -9   -1.23    2.82
   2 -10  -9    0.68    1.45
   2 -10  -8   20.75    2.28
   2 -10  -8   24.77    2.81
   2 -10  -8   22.17    3.80
   2 -10  -7   35.63    4.15
   2 -10  -7   31.35    2.45
   2 -10  -7   36.58    2.88
   2 -10  -6   43.97    3.07
   2 -10  -6   44.94    2.73
   2 -10  -6   50.64    4.39
   2 -10  -5   54.15    4.26
   2 -10  -5   58.51    3.12
   2 -10  -5   61.67    3.02
   2 -10  -4    2.23    1.24
   2 -10  -4   -0.75    1.20
   2 -10  -4    0.61    2.04
   2 -10  -3   18.19    1.82
   2 -10  -3   16.99    1.75
   2 -10  -3   19.86    2.67
   2 -10  -2    4.73    1.15
   2 -10  -2    6.00    1.70
   2 -10  -2    5.46    1.25
   2 -10  -1   29.37    1.94
   2 -10  -1   27.73    2.43
   2 -10  -1   30.00    2.05
   2 -10   0    3.95    0.97
   2 -10   0    3.03    0.36
   2 -10   0    3.49    1.47
   2 -10   0    4.13    1.01
   2 -10   0    4.49    1.39
   2 -10   1  120.14    3.03
   2 -10   1  120.03    3.36
   2 -10   1  112.78    2.99
   2 -10   2    0.67    0.74
   2 -10   2    1.96    1.09
   2 -10   2    1.57    0.76
   2 -10   2    0.95    0.79
  -2  10  -3   31.41    1.85
   2 -10   3   33.03    1.39
   2 -10   3   31.85    1.56
   2 -10   3   35.52    2.18
   2 -10   3   36.07    1.54
  -2  10  -4    0.34    1.84
   2 -10   4    0.84    0.64
   2 -10   4    1.27    0.58
  -2  10  -4   -0.01    0.79
   2 -10   4   -1.16    1.18
   2 -10   4    1.18    0.50
   2 -10   5   51.20    1.85
   2 -10   5   55.14    1.52
  -2  10  -5   53.44    3.94
   2 -10   5   48.24    2.57
   2 -10   5   52.65    1.54
  -2  10  -5   51.96    1.76
   2 -10   6  158.63    2.58
   2 -10   6  153.31    4.45
   2 -10   6  153.92    2.97
  -2  10  -6  148.48    2.90
   2 -10   6  156.08    2.32
   2 -10   7    9.56    0.82
   2 -10   7   10.59    0.65
   2 -10   7    9.18    0.88
   2 -10   8   33.44    1.42
   2 -10   8   35.50    2.42
   2 -10   8   33.83    0.86
   2 -10   9  313.29    4.36
   2 -10   9  295.77    6.38
   2 -10  10  124.50    3.03
   2 -10  10  123.88    4.31
   2 -10  11  191.75    5.33
   2 -10  11  199.96    4.00
   2 -10  12   10.33    1.25
   2 -10  12    9.66    1.65
   2 -10  13   35.20    2.01
   2 -10  13   32.57    2.40
   2 -10  14    8.32    1.31
   2 -10  14    8.01    1.59
   2 -10  15   10.93    1.50
   2 -10  15   15.33    1.89
   2 -10  16   57.55    3.15
   2 -10  16   56.52    2.90
   2 -10  17    0.82    1.10
   2 -10  17    0.98    1.38
   2 -10  18    1.05    1.25
  -2  10 -18    4.68    6.94
   2 -10  18    2.96    1.37
   2 -10  19    1.64    1.31
   2 -10  19    2.69    1.26
   2 -10  20   11.73    1.84
   2 -10  20    9.42    1.81
   2 -10  21    6.60    1.77
   2 -10  21    6.23    1.55
   2 -10  22   -1.45    7.36
   2 -10  22   -0.67    1.17
   2 -10  22   -0.08    1.51
   2 -10  23   10.36    2.13
   2 -10  23   13.13    7.43
   2 -10  23   12.30    1.87
   2 -10  24    4.55    1.86
   2 -10  24    4.41    1.49
   2 -10  24    9.54    7.51
   2 -10  25    2.54    1.44
   2 -10  25    2.75    7.38
   2 -10  25   -2.52    1.94
   2 -10  26   34.91    2.99
   2 -10  26   29.32    3.17
   2 -10  27   -1.67    1.94
   2 -10  27   -0.04    1.47
   2  -9 -19   -7.34    3.67
   2  -9 -19    3.38    5.47
   2  -9 -18   34.42    6.85
   2  -9 -18   42.37    5.11
   2  -9 -17   -1.30    4.76
   2  -9 -17    9.69    3.29
   2  -9 -16   12.90    3.50
   2  -9 -16   17.69    5.49
   2  -9 -15    5.47    4.60
   2  -9 -15    2.16    2.53
   2  -9 -14    1.15    4.12
   2  -9 -14    3.74    2.42
   2  -9 -14    8.89    2.24
   2  -9 -13  124.38    6.59
   2  -9 -13  133.80    9.18
   2  -9 -13  119.53    5.06
   2  -9 -12   13.49    4.18
   2  -9 -12    7.07    2.44
   2  -9 -12    8.85    2.09
   2  -9 -11  191.87    6.03
   2  -9 -11  185.29    7.28
   2  -9 -11  173.77    9.32
   2  -9 -10   -0.98    2.87
   2  -9 -10   -1.45    1.95
   2  -9 -10   -1.90    1.70
   2  -9  -9  109.96    5.17
   2  -9  -9  100.46    4.20
   2  -9  -9  110.92    7.07
   2  -9  -8   86.86    5.93
   2  -9  -8   77.93    4.14
   2  -9  -8   78.74    3.61
   2  -9  -7  179.83    7.82
   2  -9  -7  189.37    5.88
   2  -9  -7  188.86    5.19
   2  -9  -6  153.54    5.03
   2  -9  -6  154.90    7.06
   2  -9  -6  155.50    4.55
   2  -9  -5  260.15    5.51
   2  -9  -5  268.49    6.13
   2  -9  -5  272.55    8.51
   2  -9  -4  656.75    8.96
   2  -9  -4  635.53   11.95
   2  -9  -3  114.85    3.66
   2  -9  -3  101.86    4.72
   2  -9  -3  107.40    3.53
   2  -9  -2  372.52    5.80
   2  -9  -2  386.11    6.18
   2  -9  -1    6.66    1.80
   2  -9  -1   11.07    1.42
   2  -9  -1    6.18    1.65
   2  -9   0  261.67    4.51
   2  -9   0  257.20    4.31
   2  -9   0  253.78    5.25
   2  -9   1   90.30    2.77
   2  -9   1   91.96    2.51
   2  -9   1   88.11    2.53
   2  -9   2  953.42    9.62
   2  -9   2  975.50    7.73
   2  -9   2  973.18    7.86
   2  -9   2  965.73    7.47
  -2   9  -3  105.87    1.52
   2  -9   3  107.80    2.56
   2  -9   3  119.44    2.60
  -2   9  -3  104.72    2.72
   2  -9   3  114.54    3.51
   2  -9   3  110.95    2.36
   2  -9   4  355.84    3.82
   2  -9   4  352.39    6.15
  -2   9  -4  352.50    4.52
  -2   9  -4  351.40    8.53
   2  -9   4  361.15    3.93
   2  -9   4  343.33    4.35
   2  -9   5  460.74    3.90
  -2   9  -5  454.67    4.84
   2  -9   5  448.92    4.28
   2  -9   5  440.71    6.94
   2  -9   5  451.79    4.93
  -2   9  -6   37.54    0.87
   2  -9   6   36.99    1.37
   2  -9   6   37.83    1.51
   2  -9   6   37.49    2.31
   2  -9   6   39.15    1.05
   2  -9   7  676.61    9.14
   2  -9   7  684.14    5.86
   2  -9   8   61.91    3.01
   2  -9   8   74.38    2.12
   2  -9   9  112.06    3.94
   2  -9   9  121.52    2.86
   2  -9  10  104.19    3.88
   2  -9  10  115.86    3.05
   2  -9  11  841.48   10.59
   2  -9  11  972.38    8.99
   2  -9  12  189.82    1.98
   2  -9  12  202.90    5.23
   2  -9  13  147.64    3.95
   2  -9  13  132.55    4.33
   2  -9  14  125.21    4.21
   2  -9  14  135.07    4.01
   2  -9  15    0.07    0.99
   2  -9  15   -1.31    1.30
   2  -9  16  363.80    7.04
   2  -9  16  376.11    7.20
   2  -9  17   -1.03    1.17
   2  -9  17   -0.50    1.16
   2  -9  18  223.85    5.61
   2  -9  18  217.02    5.92
   2  -9  19   43.05    2.65
   2  -9  19   46.95    3.00
   2  -9  20   92.00    4.25
   2  -9  20   93.57    3.80
   2  -9  21   92.55    3.85
   2  -9  21   99.45    4.62
   2  -9  22    8.70    1.74
   2  -9  22   11.81    2.17
   2  -9  22   17.02    7.61
   2  -9  23   17.57    2.51
   2  -9  23   17.90    2.07
   2  -9  24    0.24    1.48
   2  -9  24    3.29    1.87
   2  -9  24   -3.59    6.74
   2  -9  25   33.58    2.75
   2  -9  25   31.50    3.39
   2  -9  26    0.27    1.81
   2  -9  26   -0.04    1.43
   2  -9  27   36.05    3.00
   2  -9  27   25.50    3.38
   2  -8 -20   11.55    5.90
   2  -8 -19   32.84    7.23
   2  -8 -19   18.11    4.03
   2  -8 -18   10.84    3.70
   2  -8 -18   15.36    5.80
   2  -8 -17    2.39    2.80
   2  -8 -17    6.57    4.99
   2  -8 -16    4.62    2.65
   2  -8 -16   -0.19    4.39
   2  -8 -15   -0.25    2.82
   2  -8 -15   -1.81    3.72
   2  -8 -14    9.79    4.90
   2  -8 -14    4.28    2.87
   2  -8 -14    6.91    2.00
   2  -8 -13   -1.45    2.45
   2  -8 -13    3.08    1.88
   2  -8 -12   80.29    4.07
   2  -8 -12   85.45    5.41
   2  -8 -12   86.78    7.08
   2  -8 -11   13.19    3.66
   2  -8 -11   13.27    2.55
   2  -8 -11   11.41    2.01
   2  -8 -10  158.36    6.44
   2  -8 -10  153.06    8.39
   2  -8 -10  144.80    4.92
   2  -8  -9   91.77    4.69
   2  -8  -9   82.12    6.18
   2  -8  -9   88.29    3.78
   2  -8  -8    3.59    2.69
   2  -8  -8    4.36    1.72
   2  -8  -8    4.45    1.51
   2  -8  -7   54.46    4.73
   2  -8  -7   61.84    2.97
   2  -8  -7   60.49    3.53
   2  -8  -6    4.01    1.76
   2  -8  -6    1.40    1.35
   2  -8  -6    3.63    2.79
   2  -8  -5  213.64    7.39
   2  -8  -5  208.43    4.74
   2  -8  -5  216.00    5.49
   2  -8  -4    5.26    1.23
   2  -8  -4    6.52    2.09
   2  -8  -4    4.48    1.18
   2  -8  -3   12.40    2.12
   2  -8  -3   12.62    1.57
   2  -8  -3   13.82    1.55
   2  -8  -2   38.48    2.68
   2  -8  -2   34.00    1.91
   2  -8  -2   42.69    2.12
   2  -8  -1   17.42    1.37
   2  -8  -1   14.83    1.85
   2  -8  -1   18.50    1.55
   2  -8   0  475.61    6.80
   2  -8   0  472.74    5.69
   2  -8   0  470.10    5.46
   2  -8   1  126.38    2.87
   2  -8   1  115.67    5.46
   2  -8   1  122.16    3.08
   2  -8   1  122.89    2.68
   2  -8   2  336.11    4.42
   2  -8   2  334.42    4.40
   2  -8   2  328.60    3.98
   2  -8   3   29.79    1.37
  -2   8  -3   29.49    1.53
   2  -8   3   31.11    1.90
  -2   8  -3   29.93    2.80
   2  -8   3   31.61    1.29
   2  -8   3   27.46    1.14
   2  -8   4  155.64    2.26
   2  -8   4  150.98    3.88
  -2   8  -4  151.12    2.84
   2  -8   4  154.08    2.85
   2  -8   4  153.60    2.65
   2  -8   5   57.98    1.77
   2  -8   5   58.54    1.68
  -2   8  -5   56.95    1.83
   2  -8   5   60.84    1.26
   2  -8   5   55.36    2.57
   2  -8   6  174.74    4.50
   2  -8   6  180.31    1.73
   2  -8   6  180.82    3.01
   2  -8   6  177.48    3.04
   2  -8   7   71.62    2.06
   2  -8   7   72.04    2.97
   2  -8   8   16.90    1.71
   2  -8   8   19.05    1.24
   2  -8   9   35.67    1.72
   2  -8   9   31.61    2.21
   2  -8  10  191.22    4.92
   2  -8  10  202.88    4.09
   2  -8  11  193.16    1.93
   2  -8  11  195.50    4.23
   2  -8  12   85.81    1.59
   2  -8  12   81.80    3.38
   2  -8  12   86.00    3.02
   2  -8  13   73.66    2.95
   2  -8  13   72.28    3.20
   2  -8  14   63.00    3.00
   2  -8  14   65.32    2.93
  -2   8 -15   28.72    7.92
   2  -8  15   34.59    2.38
   2  -8  15   35.74    2.46
  -2   8 -16   55.38    9.98
   2  -8  16   64.20    3.05
   2  -8  16   58.78    3.13
  -2   8 -17  106.46   12.93
   2  -8  17  102.05    3.73
   2  -8  17  113.04    4.28
   2  -8  18   25.24    2.15
   2  -8  18   25.89    2.38
   2  -8  19   29.12    2.58
   2  -8  19   28.01    2.23
   2  -8  20   43.28    3.15
   2  -8  20   45.51    8.83
   2  -8  20   38.82    2.56
   2  -8  21   -0.47    1.53
   2  -8  21    0.24    1.22
   2  -8  21   -0.54    6.62
   2  -8  22   20.40    2.61
   2  -8  22   21.11    2.24
   2  -8  23   16.04    2.04
   2  -8  23   12.01    2.29
   2  -8  24    4.66    1.36
   2  -8  24    6.02    2.09
   2  -8  25    0.31    1.93
   2  -8  25    1.25    1.56
   2  -8  26    7.80    1.91
   2  -8  26   10.79    2.62
   2  -8  27    6.06    2.21
   2  -7 -20   25.23    6.31
   2  -7 -20   15.62    4.14
   2  -7 -19   11.46    5.53
   2  -7 -19    7.87    3.71
   2  -7 -18    8.16    4.75
   2  -7 -18   13.60    3.73
   2  -7 -17    2.88    3.04
   2  -7 -17    0.05    4.11
   2  -7 -16    2.11    2.41
   2  -7 -16    2.30    3.82
   2  -7 -15    4.43    2.77
   2  -7 -15    7.94    4.52
   2  -7 -14   39.34    4.19
   2  -7 -14   47.53    6.03
   2  -7 -13  171.52    7.37
   2  -7 -13  171.42    9.88
   2  -7 -13  176.57    5.73
   2  -7 -12  148.12    8.93
   2  -7 -12  148.75    6.67
   2  -7 -12  155.56    5.30
   2  -7 -11  244.56    8.01
   2  -7 -11  251.65   10.73
   2  -7 -11  241.61    6.32
   2  -7 -10    2.94    2.90
   2  -7 -10    4.19    2.17
   2  -7 -10    1.37    1.41
   2  -7  -9  186.78    6.54
   2  -7  -9  180.72    5.15
   2  -7  -9  180.54    8.49
   2  -7  -8   18.49    2.03
   2  -7  -8   19.89    2.64
   2  -7  -8   23.07    3.75
   2  -7  -7  229.37    8.41
   2  -7  -7  244.32    6.56
   2  -7  -7  223.42    5.22
   2  -7  -6  155.80    4.96
   2  -7  -6  148.94    6.56
   2  -7  -6  143.34    4.14
   2  -7  -5  391.58    7.13
   2  -7  -5  394.02    9.78
   2  -7  -5  379.79    6.10
   2  -7  -4  604.63    8.13
   2  -7  -4  604.80   11.06
   2  -7  -4  607.41    7.34
   2  -7  -3  233.08    4.78
   2  -7  -3  233.69    6.37
   2  -7  -3  232.60    4.35
   2  -7  -2    5.94    1.10
   2  -7  -2    7.57    1.69
   2  -7  -2    7.66    1.09
   2  -7  -1  104.60    2.69
   2  -7  -1  105.43    3.70
   2  -7   0  959.17    7.70
   2  -7   0 1008.52    4.87
   2  -7   0  975.62    9.24
   2  -7   0  984.97    9.37
   2  -7   0  938.40    7.21
   2  -7   1  194.34    3.34
   2  -7   1  201.60    3.71
   2  -7   1  200.68    3.14
   2  -7   1  189.18    5.91
   2  -7   2 2790.14   11.86
   2  -7   2 2794.25   14.82
   2  -7   2 2752.62   10.47
   2  -7   2 2766.46   11.93
   2  -7   3   84.21    2.02
   2  -7   3   86.69    1.70
   2  -7   3   83.42    2.06
  -2   7  -3   90.61    4.15
  -2   7  -3   79.11    2.17
   2  -7   4  721.85    5.70
   2  -7   4  734.57    8.12
  -2   7  -4  714.00    5.99
   2  -7   4  738.48    4.18
   2  -7   4  708.67    5.81
   2  -7   5  642.69    5.53
   2  -7   5  632.42    3.13
   2  -7   5  636.30    5.53
   2  -7   6   70.41    2.03
   2  -7   6   71.04    2.84
   2  -7   7  274.95    5.45
   2  -7   7  293.93    4.24
   2  -7   8   39.65    2.35
   2  -7   8   40.47    1.80
   2  -7   9  432.81    6.98
   2  -7   9  456.75    5.87
   2  -7  10  215.74    2.04
   2  -7  10  214.69    4.93
   2  -7  10  216.22    4.38
   2  -7  11  559.48    3.98
   2  -7  11  540.86    7.83
   2  -7  11  535.77    7.14
   2  -7  12  139.41    4.08
   2  -7  12  141.51    3.92
   2  -7  13  206.69    4.92
   2  -7  13  207.19    5.09
   2  -7  14   65.75    3.02
   2  -7  14   72.89    3.07
   2  -7  15   59.44    3.08
   2  -7  15   54.15    2.73
  -2   7 -15   55.32    9.12
   2  -7  16  335.27    6.39
   2  -7  16  332.87    7.09
   2  -7  17   12.40    1.85
   2  -7  17   10.44    1.50
   2  -7  18  565.23    9.76
   2  -7  18  545.56    8.29
   2  -7  19   10.16    1.64
   2  -7  19    4.51    1.59
   2  -7  19   14.01    6.49
   2  -7  20  128.42    5.14
   2  -7  20  119.56    4.18
   2  -7  21   14.77    2.03
   2  -7  21   19.41    2.66
   2  -7  22   15.12    1.96
   2  -7  22   14.26    2.42
   2  -7  22    7.89    6.12
   2  -7  23   68.69    3.53
   2  -7  23   78.22    9.83
   2  -7  23   56.99    4.01
   2  -7  24    4.28    1.63
   2  -7  24    1.22    2.02
   2  -7  25   65.89    4.64
   2  -7  25   75.37    3.93
   2  -7  26    2.75    2.22
   2  -7  26    1.99    1.53
   2  -6 -21   27.34    6.76
   2  -6 -21   24.14    4.56
   2  -6 -20   -6.73    3.99
   2  -6 -20    1.01    4.66
   2  -6 -19   23.66    6.03
   2  -6 -19   23.60    4.06
   2  -6 -18   46.15    7.17
   2  -6 -18   38.11    4.65
   2  -6 -17   15.66    3.43
   2  -6 -17    8.87    4.78
   2  -6 -16   82.79    5.91
   2  -6 -16   76.83    7.76
   2  -6 -15    2.20    4.01
   2  -6 -15    7.01    2.79
   2  -6 -14  101.80    5.91
   2  -6 -14  109.92    8.25
   2  -6 -13   67.52    3.64
   2  -6 -13   66.58    6.40
   2  -6 -13   76.34    4.97
   2  -6 -12  117.08    5.78
   2  -6 -12  118.85    4.52
   2  -6 -12  124.11    8.07
   2  -6 -11   25.36    2.98
   2  -6 -11   31.48    4.51
   2  -6 -11   28.86    2.44
   2  -6 -10   15.27    3.33
   2  -6 -10   15.70    2.07
   2  -6 -10   17.64    2.61
   2  -6  -9   28.60    2.86
   2  -6  -9   25.31    2.13
   2  -6  -9   27.05    3.90
   2  -6  -8   72.51    5.14
   2  -6  -8   84.96    4.15
   2  -6  -8   73.04    3.14
   2  -6  -7  280.21    5.59
   2  -6  -7  297.14    9.24
  -2   6   7  270.52    4.96
   2  -6  -7  296.16    7.06
   2  -6  -6   70.02    4.58
   2  -6  -6   67.16    2.78
   2  -6  -6   76.82    3.45
   2  -6  -5  240.46    4.74
   2  -6  -5  232.14    5.42
   2  -6  -4   74.88    2.96
   2  -6  -4   73.24    2.60
   2  -6  -4   69.76    3.98
   2  -6  -3  293.06    5.07
   2  -6  -3  281.49    6.72
   2  -6  -3  293.53    4.63
   2  -6  -2  583.50    6.62
   2  -6  -2  572.27    6.03
   2  -6  -1   50.43    1.91
   2  -6  -1   48.92    2.48
   2  -6  -1   49.59    1.80
   2  -6   0  287.91    4.78
   2  -6   0  288.78    3.75
   2  -6   0  294.87    4.12
   2  -6   1    9.44    0.88
   2  -6   1    9.67    1.13
   2  -6   1   10.06    0.80
   2  -6   1    9.01    1.72
   2  -6   1    9.34    1.01
   2  -6   2  619.02    6.64
   2  -6   2  610.45    5.29
  -2   6  -2  628.60    9.73
   2  -6   2  632.61    4.48
   2  -6   2  640.02    5.62
  -2   6  -2  618.85    6.01
  -2   6  -3  201.34    3.27
   2  -6   3  203.50    3.03
   2  -6   3  208.53    3.12
  -2   6  -3  209.72    2.18
   2  -6   3  201.38    2.20
   2  -6   4   70.92    1.92
   2  -6   4   59.62    2.37
   2  -6   4   66.17    1.04
   2  -6   4   66.48    1.79
  -2   6  -4   76.27    2.13
   2  -6   5  510.57    5.13
   2  -6   5  492.89    4.72
   2  -6   5  503.85    6.75
   2  -6   6   47.99    1.77
   2  -6   6   43.70    2.18
   2  -6   7  223.59    4.74
   2  -6   7  223.09    3.84
   2  -6   8   39.21    2.19
   2  -6   8   38.42    1.82
   2  -6   9    0.71    0.97
   2  -6   9    2.17    0.90
   2  -6   9    0.72    0.28
   2  -6  10   40.10    1.12
   2  -6  10   39.50    2.23
   2  -6  11  123.04    3.59
   2  -6  11  121.89    3.65
   2  -6  12   18.75    1.68
   2  -6  12   16.41    1.62
   2  -6  13   66.36    2.95
   2  -6  13   76.14    3.01
  -2   6 -13   56.66    8.23
   2  -6  14   16.36    1.82
   2  -6  14   12.44    1.54
   2  -6  15  113.04    3.65
  -2   6 -15  116.93   11.95
   2  -6  15  119.61    4.26
   2  -6  16   62.15    3.34
   2  -6  16   64.45    2.88
   2  -6  17   88.00    3.35
   2  -6  17   87.83    4.00
   2  -6  18  115.67   10.65
   2  -6  18  117.87    4.74
   2  -6  18  120.65    3.96
   2  -6  19    2.23    1.27
   2  -6  19    5.22    1.67
   2  -6  20    7.90    6.00
   2  -6  20    2.02    1.65
   2  -6  20    1.55    1.31
   2  -6  21    2.32    1.83
   2  -6  21   -0.25    5.22
   2  -6  21    3.07    1.30
   2  -6  22   17.00    6.05
   2  -6  22   13.89    1.89
   2  -6  22    7.45    2.11
   2  -6  23    0.66    1.77
   2  -6  23   -0.63    1.48
   2  -6  24   39.90    3.07
   2  -6  24   31.95    3.46
   2  -6  25    1.12    1.61
   2  -6  25   -0.54    1.90
   2  -6  26   14.66    2.82
   2  -6  26   12.10    2.21
   2  -5 -21    7.42    3.73
   2  -5 -21    1.99    4.90
   2  -5 -20    5.10    5.37
   2  -5 -20   10.68    3.53
   2  -5 -19   24.35    4.40
   2  -5 -19   38.63    6.88
   2  -5 -18   36.35    4.84
   2  -5 -18   40.08    6.30
   2  -5 -17    9.05    3.08
   2  -5 -17    5.66    4.14
   2  -5 -16   42.99    4.65
   2  -5 -16   39.12    6.13
   2  -5 -15    9.76    4.26
   2  -5 -15   19.57    3.80
   2  -5 -14   64.37    6.62
   2  -5 -14   43.65    4.42
   2  -5 -13    3.74    3.64
   2  -5 -13    6.64    2.65
   2  -5 -12   26.90    2.44
   2  -5 -12   22.89    4.40
   2  -5 -11    5.21    1.63
   2  -5 -11    4.66    3.42
   2  -5 -10  214.26    6.99
   2  -5 -10  214.80    9.15
   2  -5 -10  202.66    5.23
   2  -5  -9  172.58    6.01
   2  -5  -9  170.43    4.64
   2  -5  -9  162.31    7.71
   2  -5  -8  194.45    7.87
   2  -5  -8  185.83    5.75
   2  -5  -8  176.45    4.51
   2  -5  -7  374.98    7.67
   2  -5  -7  364.20   10.05
   2  -5  -7  358.14    6.03
   2  -5  -6   10.64    2.60
   2  -5  -6   12.11    2.26
   2  -5  -6   18.22    1.94
   2  -5  -5  431.98    6.05
   2  -5  -5  424.58    9.41
   2  -5  -5  431.82    7.10
   2  -5  -4  353.38    7.94
   2  -5  -4  357.40    5.87
   2  -5  -4  347.22    5.10
   2  -5  -3  904.08   11.30
   2  -5  -3  885.73    7.70
   2  -5  -2 1421.09    9.79
   2  -5  -2 1405.92    8.98
   2  -5  -1   18.55    1.35
   2  -5  -1   16.56    1.68
   2  -5  -1   18.74    1.16
   2  -5   0 2589.64   11.30
   2  -5   0 2571.32   13.30
   2  -5   0 2574.98   10.34
   2  -5   1  343.91    4.37
   2  -5   1  347.52    3.98
   2  -5   1  335.28    4.44
  -2   5  -1  336.52    4.73
   2  -5   1  351.22    3.42
   2  -5   2 2160.35    7.27
   2  -5   2 2125.77   11.58
   2  -5   2 2135.90    9.39
   2  -5   2 2182.67   10.04
  -2   5  -2 2162.13    7.08
  -2   5  -2 2136.28   10.55
   2  -5   3 1256.92    7.20
   2  -5   3 1275.75    7.78
  -2   5  -3 1285.27    4.44
   2  -5   3 1248.70    9.32
   2  -5   4  253.44    4.50
   2  -5   4  251.20    3.52
   2  -5   4  255.16    3.25
   2  -5   5  491.71    5.23
   2  -5   5  476.91    6.30
   2  -5   6  975.16    7.74
   2  -5   6  985.69    9.24
   2  -5   7  964.56    9.23
   2  -5   7  904.51    7.82
   2  -5   8   96.43    3.05
   2  -5   8   93.63    2.75
   2  -5   8   96.64    1.37
   2  -5   9  367.03    5.90
   2  -5   9  384.13    5.76
   2  -5  10   22.87    1.71
   2  -5  10   23.62    1.72
   2  -5  11  728.20    8.50
   2  -5  11  715.77    8.64
   2  -5  12   49.46    2.54
   2  -5  12   59.15    2.53
  -2   5 -13  390.41   18.96
   2  -5  13  408.52    7.20
   2  -5  13  403.01    6.37
   2  -5  14   56.74    2.52
  -2   5 -14   61.99    8.86
   2  -5  14   57.31    2.97
   2  -5  15   23.73    2.39
   2  -5  15   20.04    1.83
   2  -5  16  141.22    5.01
   2  -5  16  142.54    4.07
   2  -5  17   27.24    2.03
   2  -5  17   27.31    2.44
   2  -5  18  361.21    6.81
   2  -5  18  323.81   15.76
   2  -5  18  330.01    7.77
   2  -5  19    4.35    1.24
   2  -5  19    1.17    5.08
   2  -5  19    4.30    1.75
   2  -5  20   44.02    3.42
   2  -5  20   49.72    7.53
   2  -5  20   42.48    2.65
   2  -5  21    7.12    5.30
   2  -5  21    0.16    1.29
   2  -5  21    3.69    1.75
   2  -5  22    7.78    2.11
   2  -5  22    2.44    1.43
   2  -5  23  153.29    6.32
   2  -5  23  159.06    5.37
   2  -5  24    2.61    1.44
   2  -5  24    5.55    2.21
   2  -5  25   48.03    4.15
   2  -5  25   52.28    3.55
   2  -4 -22   -5.31    3.84
   2  -4 -22    8.15    5.23
   2  -4 -21    9.28    5.62
   2  -4 -21    0.66    3.12
   2  -4 -20    2.88    2.95
   2  -4 -20    9.11    5.45
   2  -4 -19   10.69    5.14
   2  -4 -19    3.61    3.09
   2  -4 -18   24.23    5.53
   2  -4 -18   24.68    4.27
   2  -4 -17   34.95    6.03
  -2   4  17   30.30    2.91
   2  -4 -17   33.51    4.54
  -2   4  16   18.22    2.21
   2  -4 -16   23.27    5.07
   2  -4 -16   15.00    3.35
   2  -4 -15    4.33    2.70
  -2   4  15    3.77    1.55
  -2   4  14   78.08    3.79
   2  -4 -14   71.07    6.70
   2  -4 -14   86.34    5.58
   2  -4 -13   65.24    4.91
   2  -4 -13   61.45    6.03
  -2   4  13   58.91    3.18
   2  -4 -12   17.73    3.85
  -2   4  12   13.98    1.83
   2  -4 -11   21.12    3.06
   2  -4 -11   11.89    3.76
  -2   4  11   15.29    1.70
   2  -4 -10   13.55    3.27
   2  -4 -10   14.88    2.74
  -2   4  10    9.98    1.47
   2  -4 -10   13.97    1.69
   2  -4  -9  242.96    5.30
   2  -4  -9  236.37    8.81
   2  -4  -8    7.44    2.56
   2  -4  -8    5.31    1.29
   2  -4  -8    6.64    1.87
   2  -4  -7   13.49    2.07
   2  -4  -7   13.85    2.75
   2  -4  -7    9.14    1.33
  -2   4   6    3.51    2.83
   2  -4  -6    8.89    1.85
   2  -4  -6    7.05    1.36
   2  -4  -6    5.55    2.34
   2  -4  -5    4.57    1.03
   2  -4  -5    3.59    1.29
   2  -4  -5    6.16    2.01
   2  -4  -4   84.67    3.97
  -2   4   4   78.77    1.27
   2  -4  -4   87.13    2.91
   2  -4  -4   83.67    2.49
   2  -4  -3  450.12    5.16
   2  -4  -3  446.22    5.70
   2  -4  -2  531.93    5.22
   2  -4  -2  532.29    5.68
  -2   4   1    0.61    1.03
   2  -4  -1    1.00    1.05
   2  -4  -1    0.18    0.61
   2  -4  -1    1.21    0.28
   2  -4  -1    1.28    0.68
   2  -4   0  354.52    4.68
   2  -4   0  348.38    3.88
   2  -4   0  359.74    4.01
  -2   4  -1  562.43    5.58
  -2   4  -1  578.93    3.87
   2  -4   1  568.34    5.42
   2  -4   1  569.53    5.28
  -2   4  -1  620.04    8.30
   2  -4   1  596.26    8.20
   2  -4   1  574.72    4.77
  -2   4  -1  532.70   10.25
   2  -4   2  244.48    6.74
  -2   4  -2  261.52    3.62
   2  -4   2  240.51    3.83
   2  -4   2  262.39    3.51
  -2   4  -2  261.22    2.16
   2  -4   2  252.81    3.08
  -2   4  -3    0.23    3.83
  -2   4  -3    6.87    0.97
   2  -4   3    2.35    0.70
   2  -4   3    4.98    1.06
   2  -4   3    3.67    0.61
   2  -4   4   85.29    2.59
   2  -4   4   83.85    2.19
   2  -4   5  316.35    4.35
   2  -4   5  267.11    4.48
   2  -4   6  735.85    6.98
   2  -4   6  712.90    7.38
  -2   4  -7    8.82    0.51
   2  -4   7    7.53    1.20
   2  -4   7    7.98    1.08
  -2   4  -8    0.47    0.43
   2  -4   8    0.26    0.87
   2  -4   8   -0.62    0.76
   2  -4   8    0.10    0.39
   2  -4   9   15.16    1.47
  -2   4  -9   14.68    0.85
   2  -4   9   14.00    1.38
   2  -4  10   31.91    2.00
  -2   4 -10   33.07    1.29
   2  -4  10   34.06    1.89
  -2   4 -11  218.51    3.37
   2  -4  11  224.61    5.03
   2  -4  11  225.04    4.50
   2  -4  12   88.46    3.43
   2  -4  12   99.41    3.07
  -2   4 -12   98.31    9.72
   2  -4  13   10.79    1.60
   2  -4  13   11.17    1.38
   2  -4  14   12.96    1.45
   2  -4  14   15.77    1.85
   2  -4  15    1.78    1.04
   2  -4  15    2.13    1.30
   2  -4  16   -0.99    1.40
   2  -4  16    0.89    0.96
   2  -4  17    9.32    1.51
   2  -4  17   11.35    1.96
   2  -4  17    9.69    5.10
   2  -4  18    0.06    1.09
   2  -4  18    5.10    4.77
   2  -4  18    0.67    1.55
   2  -4  19   -0.56    1.49
   2  -4  19    3.39    1.40
   2  -4  20   31.37    2.93
   2  -4  20   25.65    2.23
   2  -4  21    5.56    2.09
   2  -4  21    4.73    1.45
   2  -4  22    6.99    1.61
   2  -4  22    5.44    2.16
   2  -4  23    1.04    1.97
   2  -4  23    2.82    1.55
   2  -4  24    0.59    1.94
   2  -4  24    0.76    1.55
   2  -4  25   -0.92    1.71
   2  -4  25   -0.24    2.01
   2  -3 -23    0.19    3.53
   2  -3 -23    9.84    5.87
   2  -3 -22    9.03    5.43
   2  -3 -22   14.94    4.69
   2  -3 -21   23.79    4.90
  -2   3  21   22.31    2.96
   2  -3 -21   21.50    5.76
   2  -3 -20    9.31    3.59
  -2   3  20   10.02    2.17
   2  -3 -20   10.99    4.78
  -2   3  19   16.57    2.48
   2  -3 -19   19.83    5.30
   2  -3 -19   18.87    4.02
   2  -3 -18   12.18    4.87
   2  -3 -18   12.67    3.77
  -2   3  18   10.85    2.05
   2  -3 -17    8.98    4.23
  -2   3  17    5.93    1.81
   2  -3 -17    6.05    3.15
   2  -3 -16   79.09    5.72
   2  -3 -16   78.98    7.27
  -2   3  16   92.49    4.18
   2  -3 -15    4.91    2.65
   2  -3 -15    5.03    3.64
  -2   3  15    3.55    1.44
   2  -3 -14  255.06    8.76
  -2   3  14  245.78    6.05
   2  -3 -14  252.44   11.20
   2  -3 -13   64.95    4.68
  -2   3  13   57.67    2.93
   2  -3 -13   64.24    6.01
   2  -3 -12  170.66    6.80
   2  -3 -12  155.61    8.32
  -2   3  12  163.09    4.66
  -2   3  11  161.68    4.40
   2  -3 -11  159.13    8.00
   2  -3 -11  155.79    6.28
  -2   3  10  145.73    3.94
   2  -3 -10  158.70    5.93
   2  -3 -10  146.77    7.29
  -2   3   9  156.89    3.98
   2  -3  -9  171.42    6.18
   2  -3  -9  179.56    7.66
   2  -3  -8   49.15    2.61
   2  -3  -8   44.96    5.07
   2  -3  -7  735.97    7.89
   2  -3  -7  733.80   13.30
  -2   3   7  717.99    7.31
   2  -3  -6   36.82    2.47
   2  -3  -6   36.48    3.53
   2  -3  -6   38.34    2.03
   2  -3  -5 1221.55   14.65
   2  -3  -5 1202.44    9.03
   2  -3  -4   12.99    1.35
   2  -3  -4   14.76    2.07
   2  -3  -4   11.02    1.06
  -2   3   4   12.66    0.72
   2  -3  -3  649.18    6.55
  -2   3   3  647.65    3.25
   2  -3  -3  653.27    5.77
  -2   3   2  624.85    3.16
   2  -3  -2  629.64    7.69
   2  -3  -2  643.60    5.77
   2  -3  -1  276.95    4.52
   2  -3  -1  279.36    3.46
  -2   3   1  278.68    3.02
   2  -3   0  323.97    3.49
   2  -3   0  323.82    3.65
  -2   3   0  328.50    3.08
   2  -3   0  325.83    4.28
  -2   3   0  329.27    5.07
   2  -3   0  335.16    3.54
   2  -3   1  303.21    3.28
   2  -3   1  326.66    5.33
  -2   3  -1  291.55    6.40
   2  -3   1  328.86    4.06
  -2   3  -1  299.14    4.01
   2  -3   1  291.27    3.74
  -2   3  -2  784.59    6.35
   2  -3   2  783.30    6.05
   2  -3   2  789.80    5.20
   2  -3   3   14.54    0.85
  -2   3  -3   12.02    3.86
   2  -3   3   15.89    1.09
   2  -3   3   13.12    1.17
   2  -3   4 1777.63   10.47
   2  -3   4 1737.17    9.80
  -2   3  -5    2.03    0.30
   2  -3   5    1.96    0.84
   2  -3   5    2.37    0.84
  -2   3  -6  332.11    2.62
   2  -3   6  348.75    4.95
   2  -3   7  872.90    8.20
  -2   3  -7  881.92    4.93
   2  -3   8    4.18    0.90
   2  -3   8    5.06    0.96
  -2   3  -8    5.07    0.61
   2  -3   9 1364.52   11.48
  -2   3  -9 1374.82    7.62
   2  -3   9 1384.06   10.27
  -2   3 -10    1.65    0.72
   2  -3  10    0.07    0.98
  -2   3 -10    3.42    4.38
   2  -3  10   -0.61    0.89
  -2   3 -11  320.83    4.37
   2  -3  11  317.40    6.09
   2  -3  11  324.06    5.19
   2  -3  12  234.28    4.54
  -2   3 -12  235.08    4.02
   2  -3  13  116.94    3.36
  -2   3 -13  118.77    3.10
   2  -3  13  112.19    4.11
   2  -3  14  217.65   11.36
   2  -3  14  223.21    5.89
   2  -3  14  231.65    4.84
  -2   3 -14  224.26    4.40
   2  -3  15  120.23    4.61
   2  -3  15  124.41    3.77
   2  -3  15  125.56    9.44
   2  -3  16   20.30    2.45
   2  -3  16   16.44    1.73
   2  -3  17    4.59    1.75
   2  -3  17    4.14    1.33
   2  -3  18   86.22    4.39
   2  -3  18   89.75    3.52
   2  -3  18   93.16    7.88
   2  -3  19    6.48    4.05
   2  -3  19    8.03    2.07
   2  -3  19    0.86    1.21
   2  -3  20   89.57    3.82
   2  -3  20   79.88    4.52
   2  -3  21    1.37    1.73
   2  -3  21    1.18    1.34
   2  -3  22    8.13    1.94
   2  -3  22    6.78    2.21
   2  -3  23   35.38    3.62
   2  -3  23   42.05    3.19
   2  -3  24    8.19    2.45
   2  -3  24    5.88    1.96
   2  -3  25   30.56    3.08
   2  -3  25   17.57    3.03
   2  -2 -23    9.36    4.97
  -2   2  23   12.14    2.52
   2  -2 -23   11.61    4.12
   2  -2 -22    7.60    4.95
   2  -2 -22   11.09    3.99
  -2   2  22   11.75    2.65
   2  -2 -21   -2.19    4.41
  -2   2  21    2.89    1.84
   2  -2 -21    4.26    3.62
   2  -2 -20   -1.41    3.31
   2  -2 -20    3.11    4.71
  -2   2  20    1.82    1.75
   2  -2 -19   22.27    4.29
   2  -2 -19   18.43    5.18
  -2   2  19   26.06    2.72
   2  -2 -18    1.50    2.76
   2  -2 -18   10.52    4.50
  -2   2  18    8.18    1.90
   2  -2 -17   14.27    4.66
  -2   2  17   16.88    2.11
   2  -2 -17   15.39    3.48
   2  -2 -16    4.23    2.74
   2  -2 -16    6.99    3.72
  -2   2  16    8.52    1.57
  -2   2  15   39.51    2.56
   2  -2 -15   42.40    5.53
   2  -2 -15   49.80    4.77
   2  -2 -14    6.27    2.60
   2  -2 -14    8.71    3.52
  -2   2  14    6.53    1.46
   2  -2 -13   19.91    3.14
  -2   2  13   21.19    1.86
   2  -2 -13   19.94    4.15
  -2   2  12   97.66    3.33
   2  -2 -12  102.78    6.90
   2  -2 -12  111.83    5.52
   2  -2 -11   11.09    2.55
  -2   2  11   13.61    1.37
   2  -2 -10   60.95    3.86
   2  -2 -10   58.46    4.82
  -2   2  10   59.10    2.37
   2  -2  -9  349.27    8.03
   2  -2  -9  343.75   10.01
  -2   2   8  287.83    4.58
   2  -2  -8  287.22    8.66
   2  -2  -7   34.06    3.07
   2  -2  -7   26.97    3.52
  -2   2   7   31.94    1.74
   2  -2  -6   71.03    3.08
   2  -2  -6   72.35    4.15
  -2   2   6   68.13    2.09
   2  -2  -5   65.14    2.67
   2  -2  -5   74.97    3.93
  -2   2   4   31.35    1.15
   2  -2  -4   32.45    2.51
   2  -2  -4   26.75    1.64
   2  -2  -3   54.15    1.94
  -2   2   3   56.75    1.17
   2  -2  -2  174.64    2.87
   2  -2  -2  176.05    1.95
  -2   2   2  179.64    1.87
   2  -2  -2  175.86    3.90
  -2   2   1 1864.74   11.35
   2  -2  -1 1939.98    6.30
   2  -2  -1 1885.11    8.32
   2  -2  -1 1890.34   10.71
  -2   2   1 1940.95    7.07
   2  -2   0 1493.68    7.07
  -2   2   0 1495.22    8.58
  -2   2   0 1472.48    8.90
   2  -2   0 1504.64   10.81
   2  -2   0 1469.52    6.87
   2  -2   0 1516.11    7.20
  -2   2   0 1505.54    6.96
   2  -2   0 1453.44    8.44
  -2   2  -1 2573.88   15.96
   2  -2   1 2644.83   10.40
  -2   2  -1 2789.76    6.74
  -2   2  -1 2639.47   10.39
  -2   2  -1 2698.60   11.72
   2  -2   1 2722.59   13.41
   2  -2   1 2620.88    8.88
   2  -2   1 2620.68   11.01
  -2   2  -2  165.07    3.08
   2  -2   2  151.20    2.26
   2  -2   2  164.96    2.81
  -2   2  -2  161.11    5.57
   2  -2   2  155.70    2.84
   2  -2   3 2752.70   11.72
   2  -2   3 2792.68   12.20
   2  -2   4 2055.62   10.58
   2  -2   4 2033.80   10.97
  -2   2  -5  133.70    1.73
   2  -2   5  130.02    3.02
   2  -2   5  129.84    2.78
   2  -2   6  674.75    6.39
   2  -2   6  661.60    7.02
   2  -2   7  184.82    3.46
   2  -2   7  181.72    3.94
  -2   2  -7  185.40    2.59
   2  -2   8  202.57    3.72
  -2   2  -8  191.07    2.88
   2  -2   8  197.32    4.30
  -2   2  -9  200.65    3.24
   2  -2   9  199.27    4.65
   2  -2   9  212.92    3.90
  -2   2  -9  203.51   11.25
   2  -2  10    2.63    1.21
  -2   2 -10    3.50    0.83
   2  -2  10    4.48    1.02
  -2   2 -10    0.51    3.91
   2  -2  11  286.66    5.91
  -2   2 -11  297.01    4.46
   2  -2  11  282.79    4.78
   2  -2  12    1.70    0.90
  -2   2 -12    2.67    0.89
   2  -2  12    2.25    1.14
   2  -2  13   14.53    3.75
   2  -2  13   14.45    1.86
   2  -2  13   18.60    1.65
  -2   2 -13   15.22    1.35
   2  -2  14   20.30    2.08
   2  -2  14   21.87    1.75
  -2   2 -14   22.32    1.69
   2  -2  15   48.11    2.43
   2  -2  15   48.50    3.06
   2  -2  15   48.07    6.16
  -2   2 -15   41.47    2.25
   2  -2  16    9.73    1.46
   2  -2  16   12.08    2.03
   2  -2  16    6.75    4.15
   2  -2  17    1.73    1.03
   2  -2  17    0.56    1.46
   2  -2  17    2.21    3.98
   2  -2  18    7.44    1.89
   2  -2  18    7.86    3.98
   2  -2  18    5.23    1.35
   2  -2  19    0.43    1.30
   2  -2  19    5.14    1.87
   2  -2  20    7.68    1.61
   2  -2  20    8.89    2.14
   2  -2  21   18.26    2.76
   2  -2  21   22.66    2.35
   2  -2  22    3.71    1.87
   2  -2  22    4.41    1.69
   2  -2  23    6.06    1.82
   2  -2  23    4.64    2.26
   2  -2  24    8.01    2.60
   2  -2  24    8.63    2.16
  -2   1  25    1.78    2.30
   2  -1 -24   -4.54    4.41
   2  -1 -24    5.34    6.33
  -2   1  24    2.17    2.06
   2  -1 -23    7.48    5.84
   2  -1 -23    8.94    4.32
  -2   1  23    6.65    2.28
  -2   1  22    7.72    2.26
   2  -1 -22    4.81    3.77
   2  -1 -21   49.74    5.62
[truncated: 1,390,104 more chars]
